# Supplementary material for: Coffee drinking and cancer risk: an umbrella review of meta-analyses of observational studies
Source: Springer Nature journal article supplement (doi:10.1186/s12885-020-6561-9), 2020-02-05
Supplement: MOESM2 [file 17641414]

# Supplementary figure 1, Leukemia, H/L

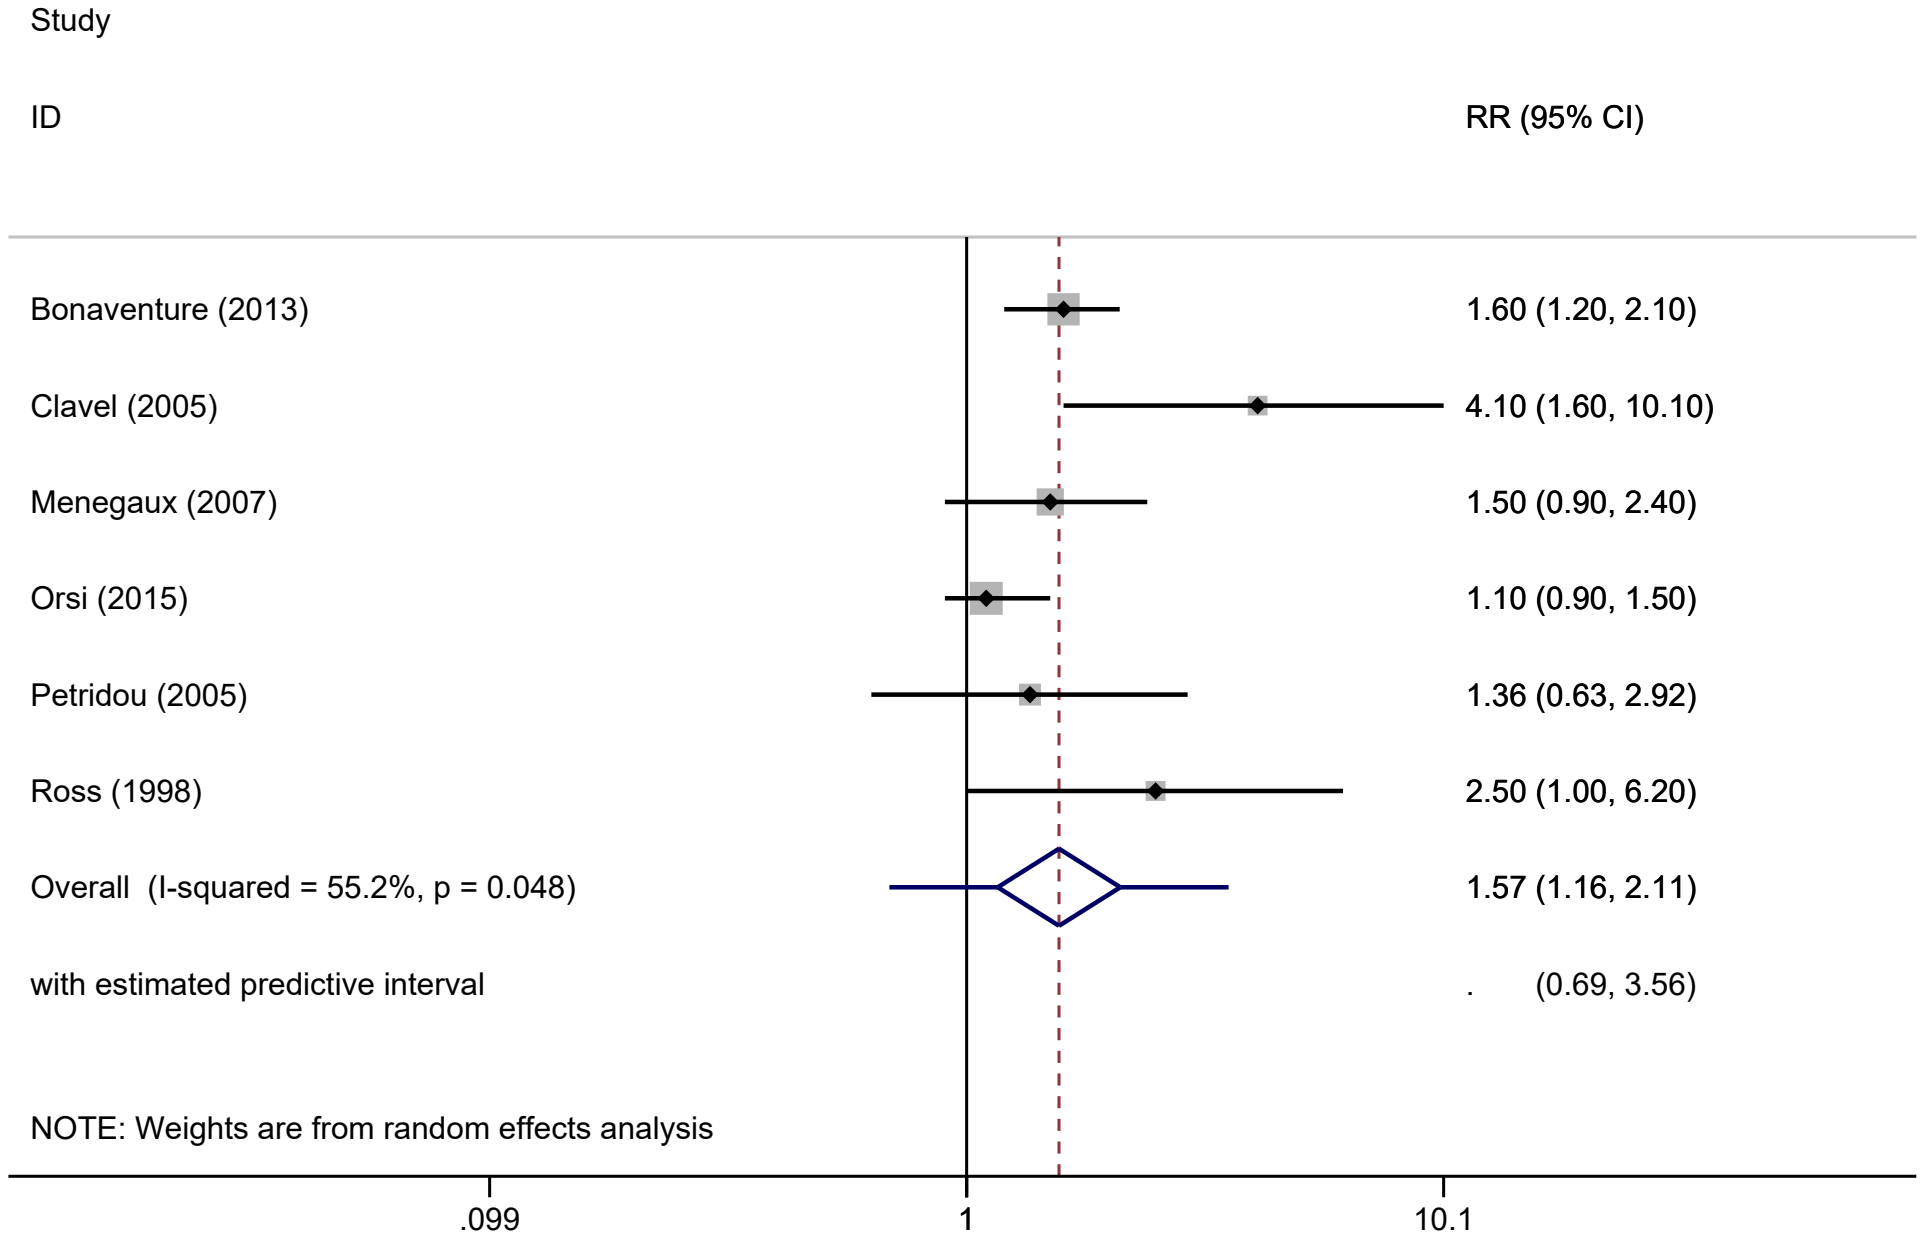

# Supplementary figure 2, Acute lymphocytic leukemia, H/L

Study

ID

RR (95% CI)

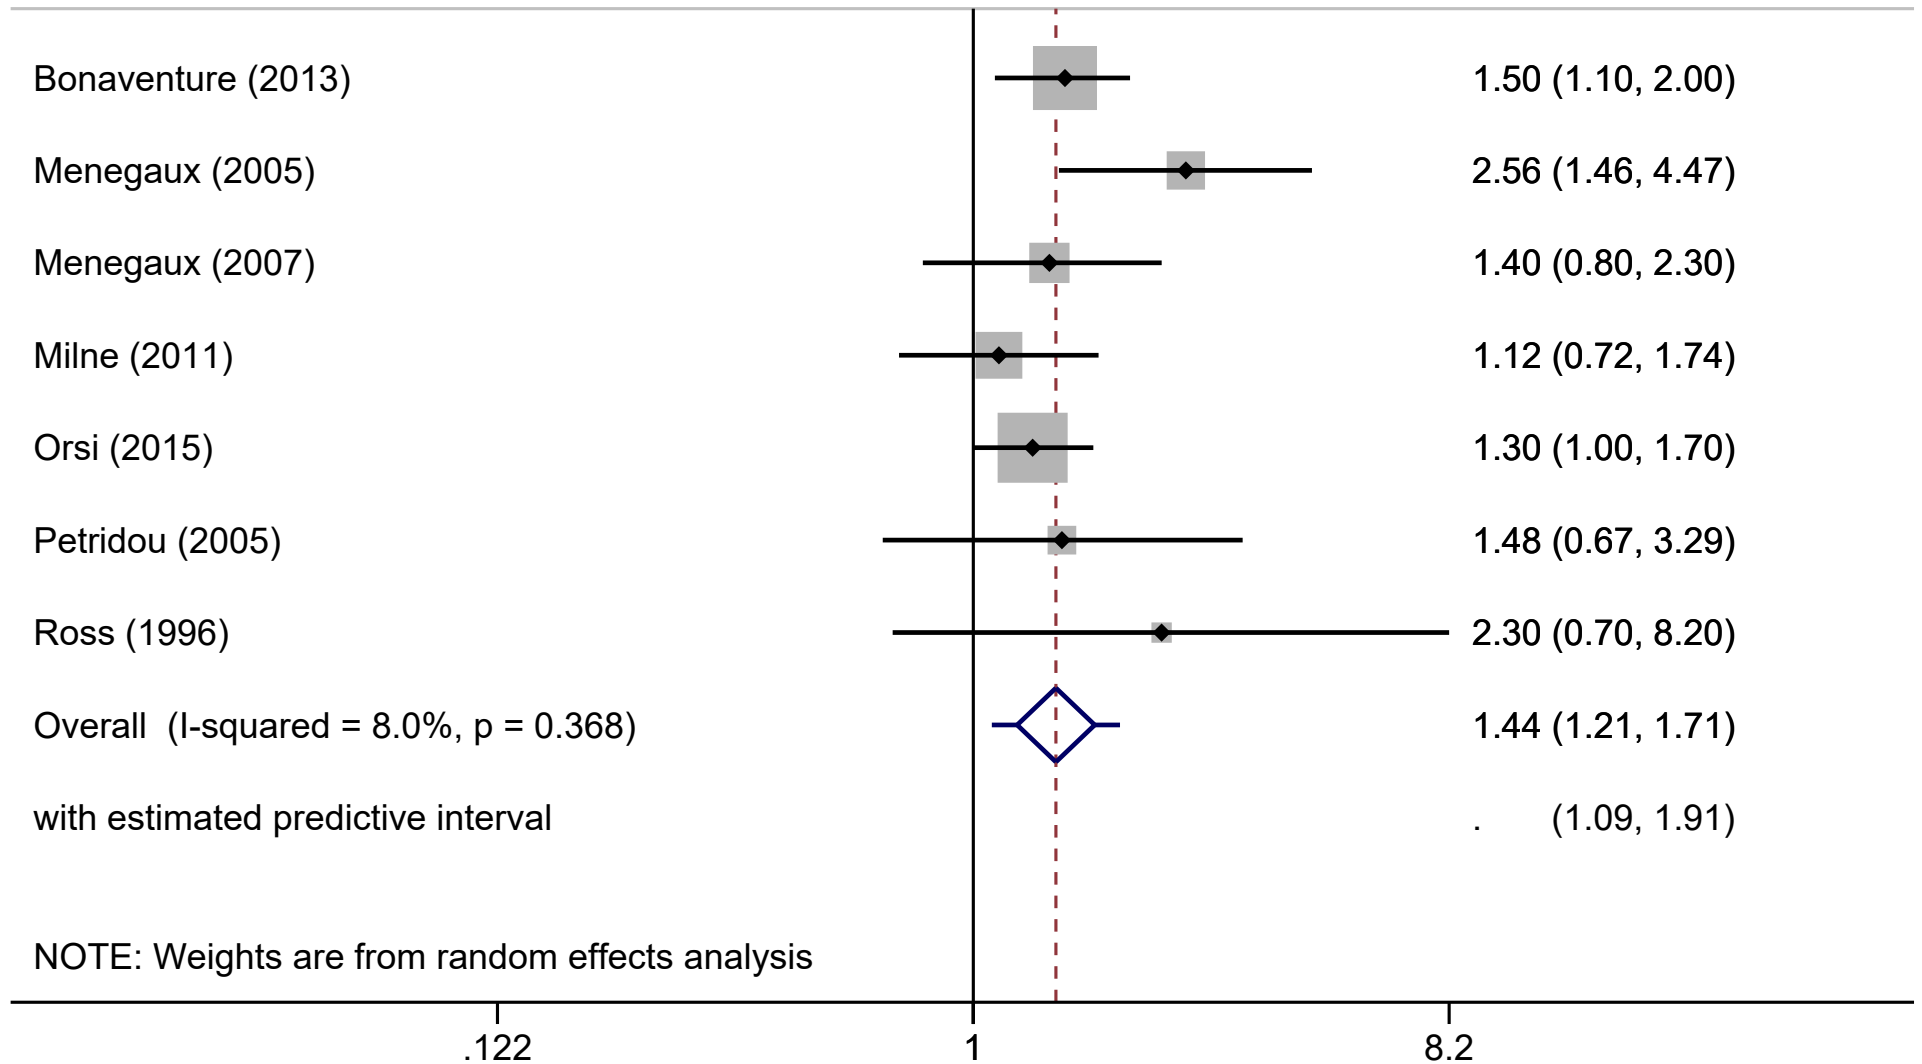

# Supplementary figure 3, Acute myelogenous leukemia, H/L

Study

ID

RR (95% CI)

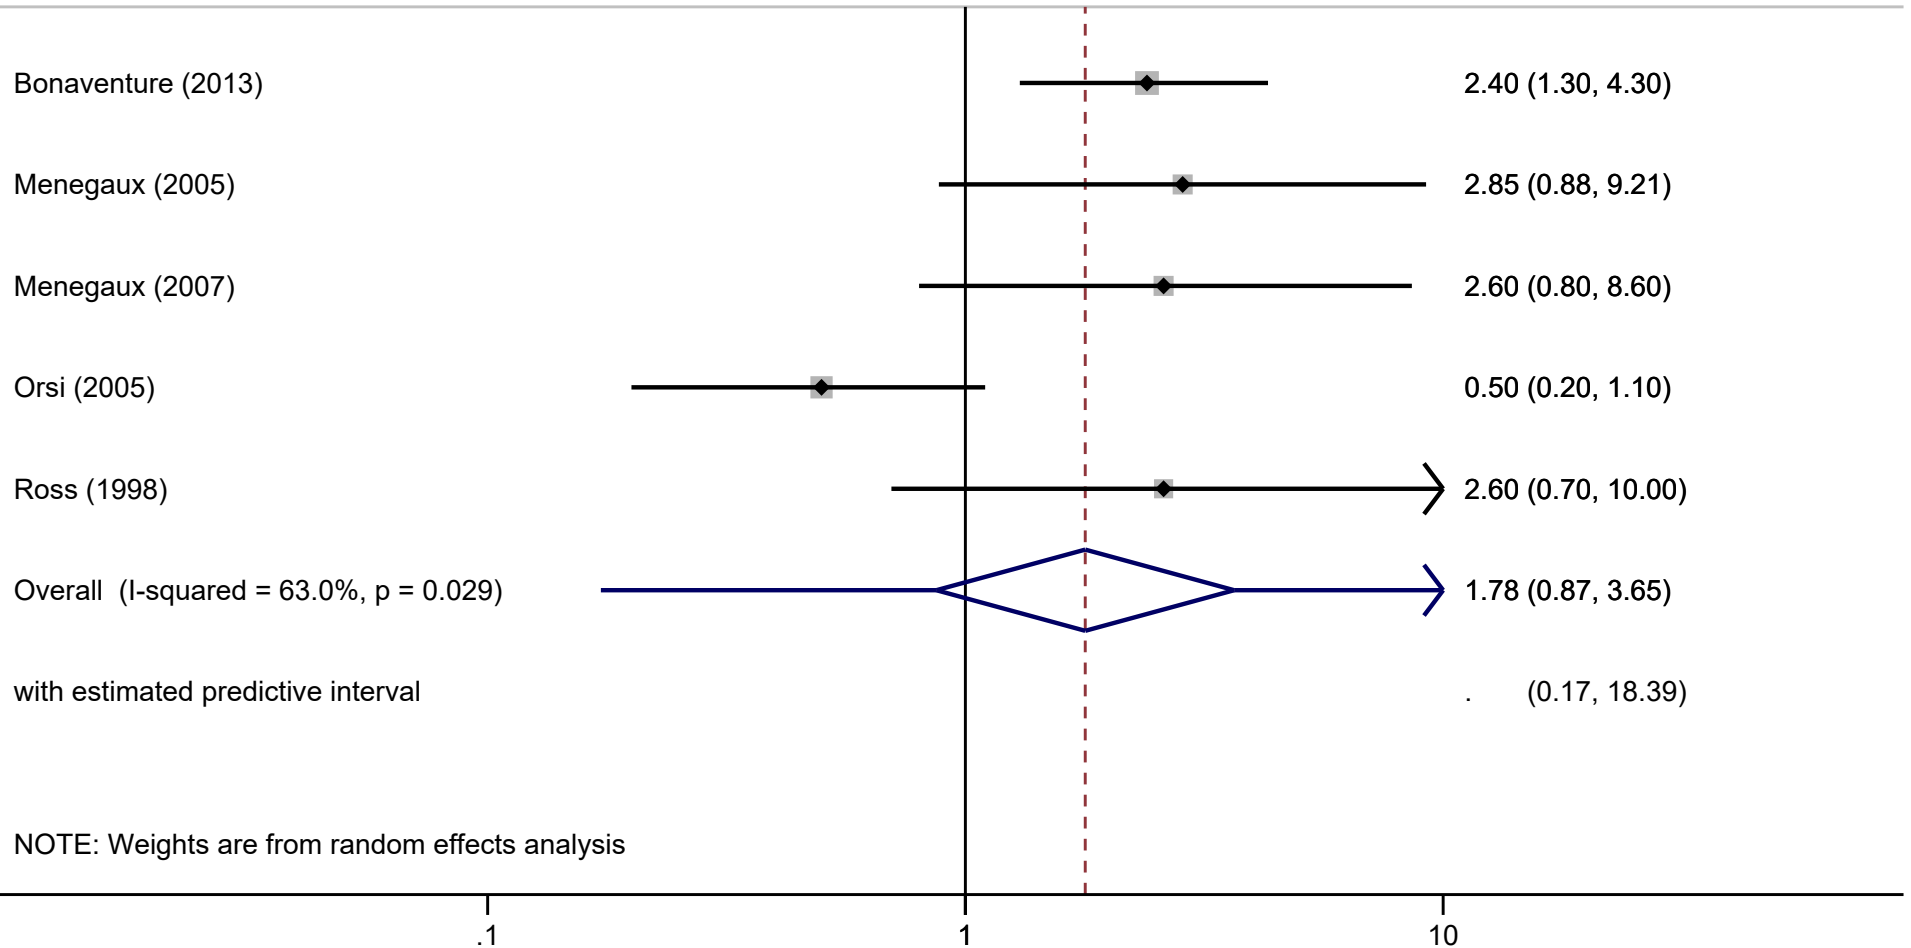

NOTE: Weights are from random effects analysis

# Supplementary figure 4, Bladder cancer, H/L

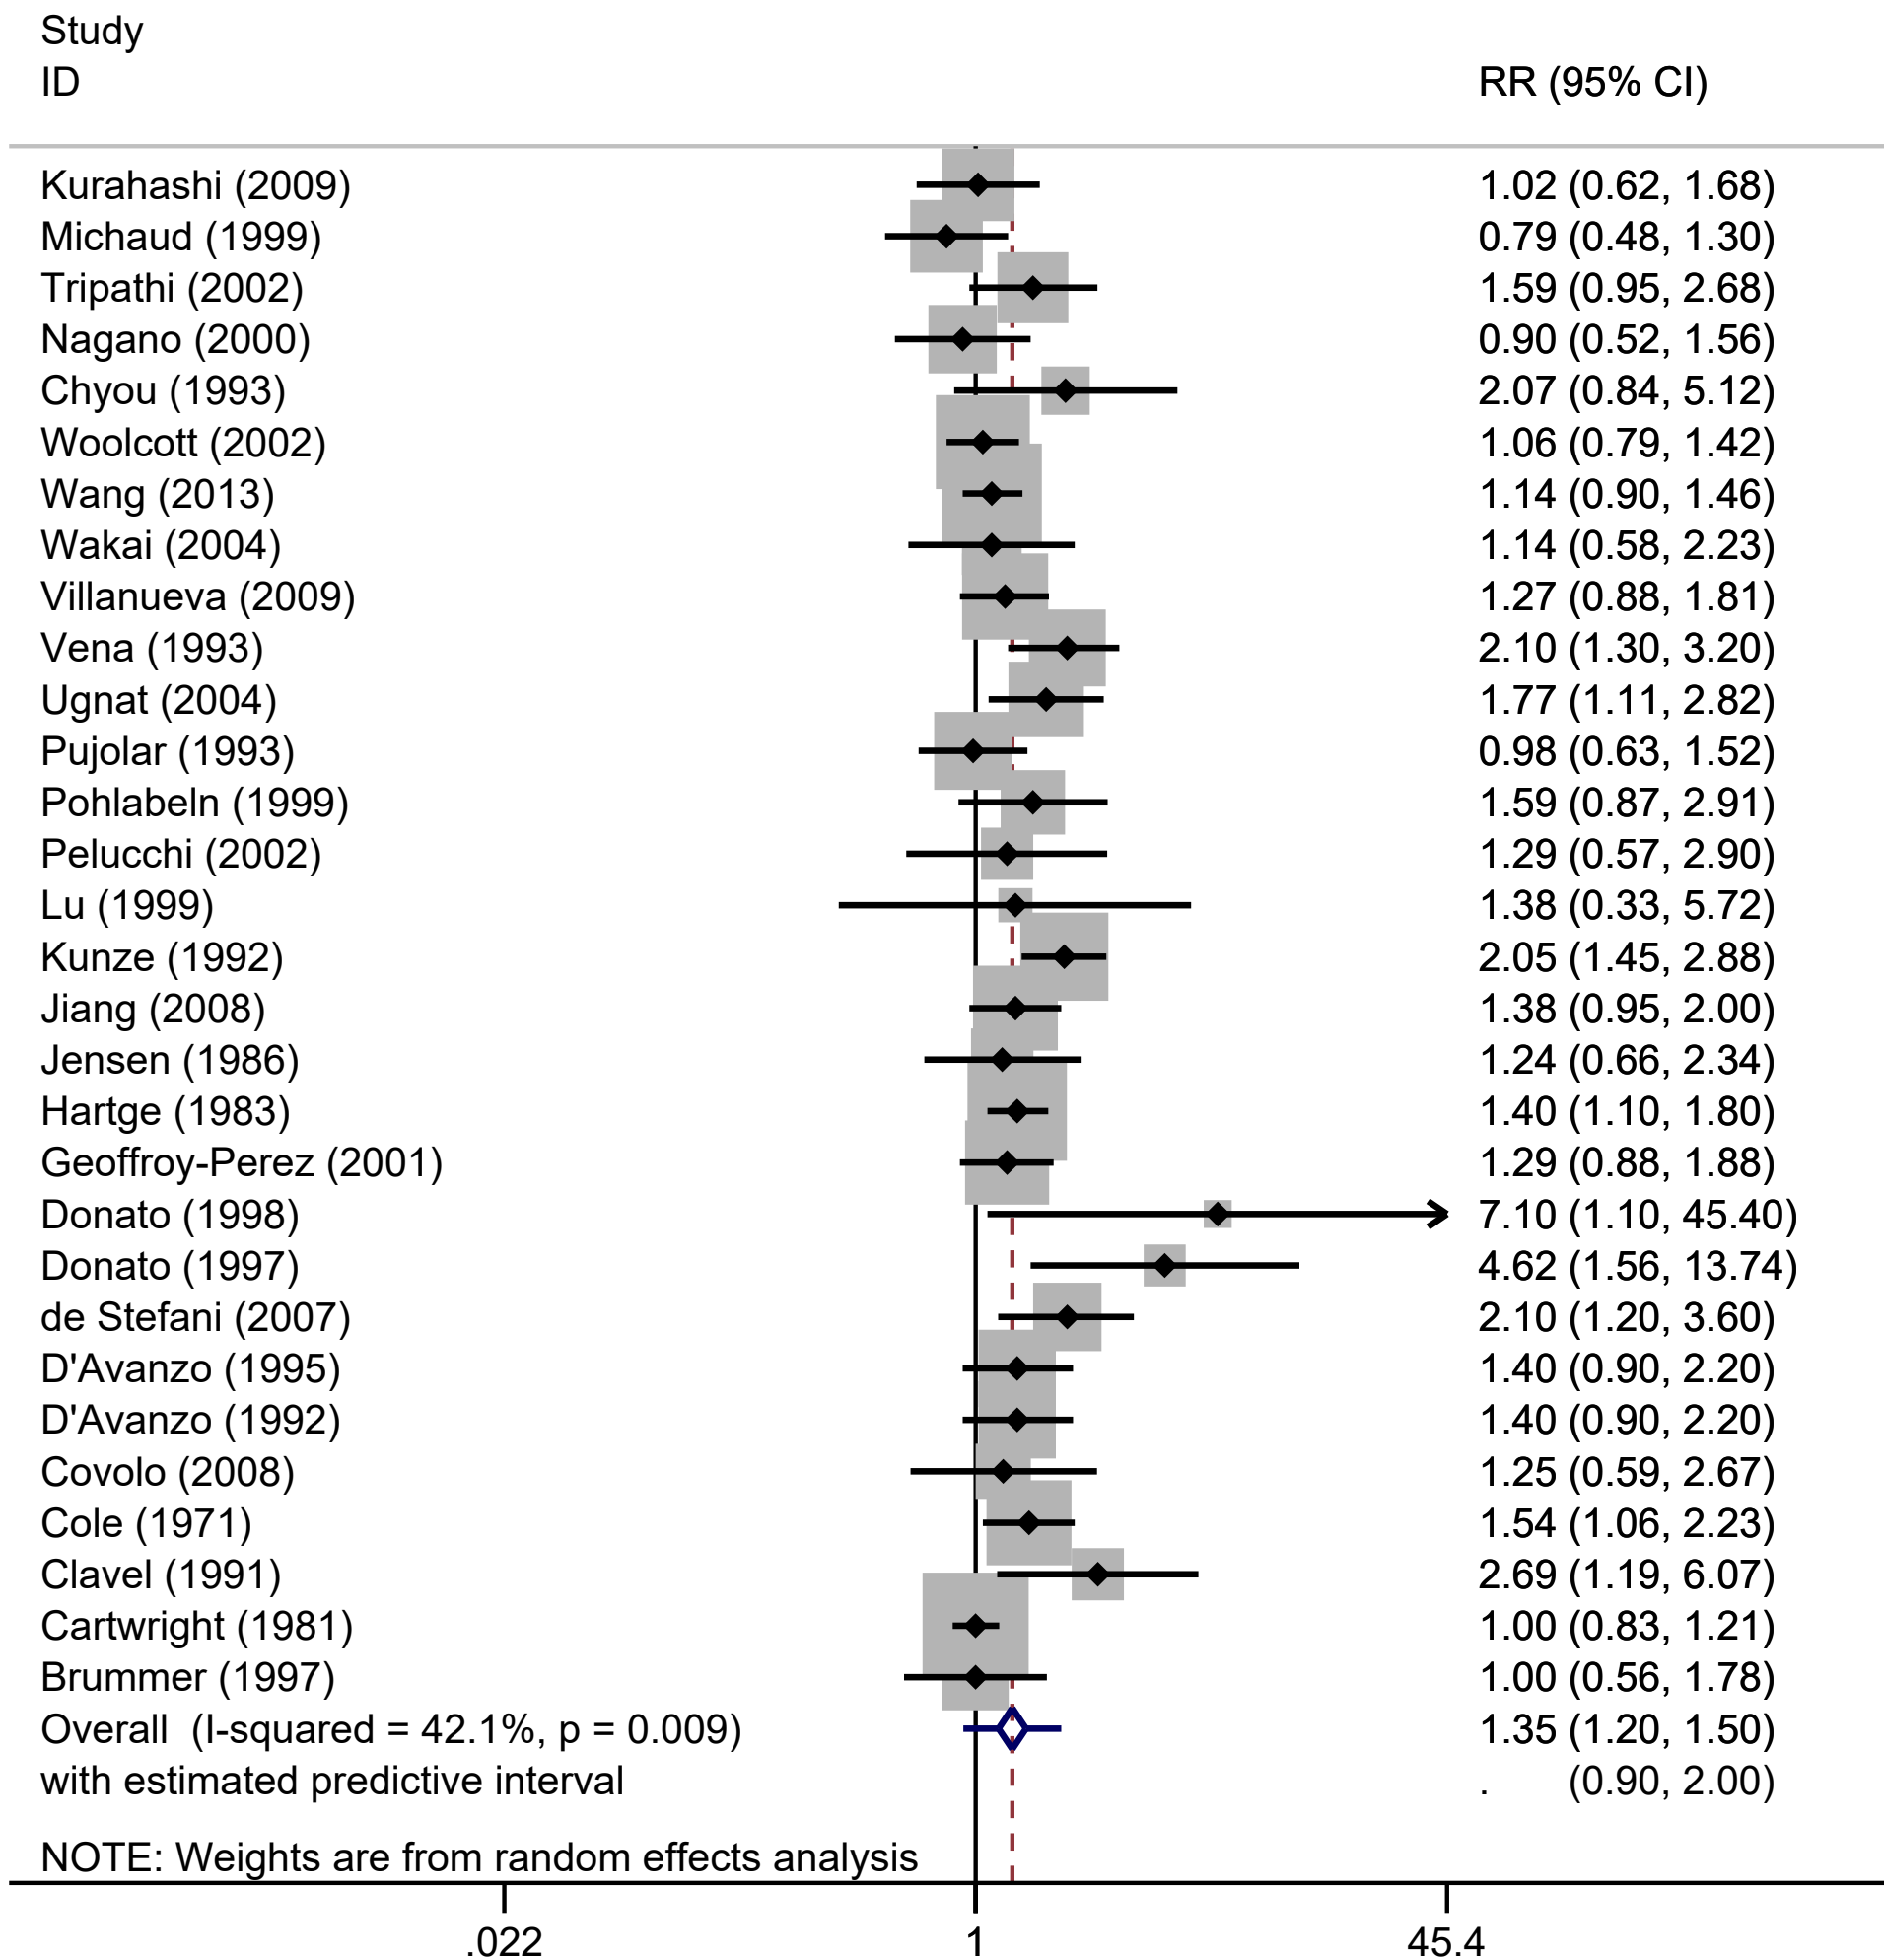

# Supplementary figure 5, Breast cancer, H/L

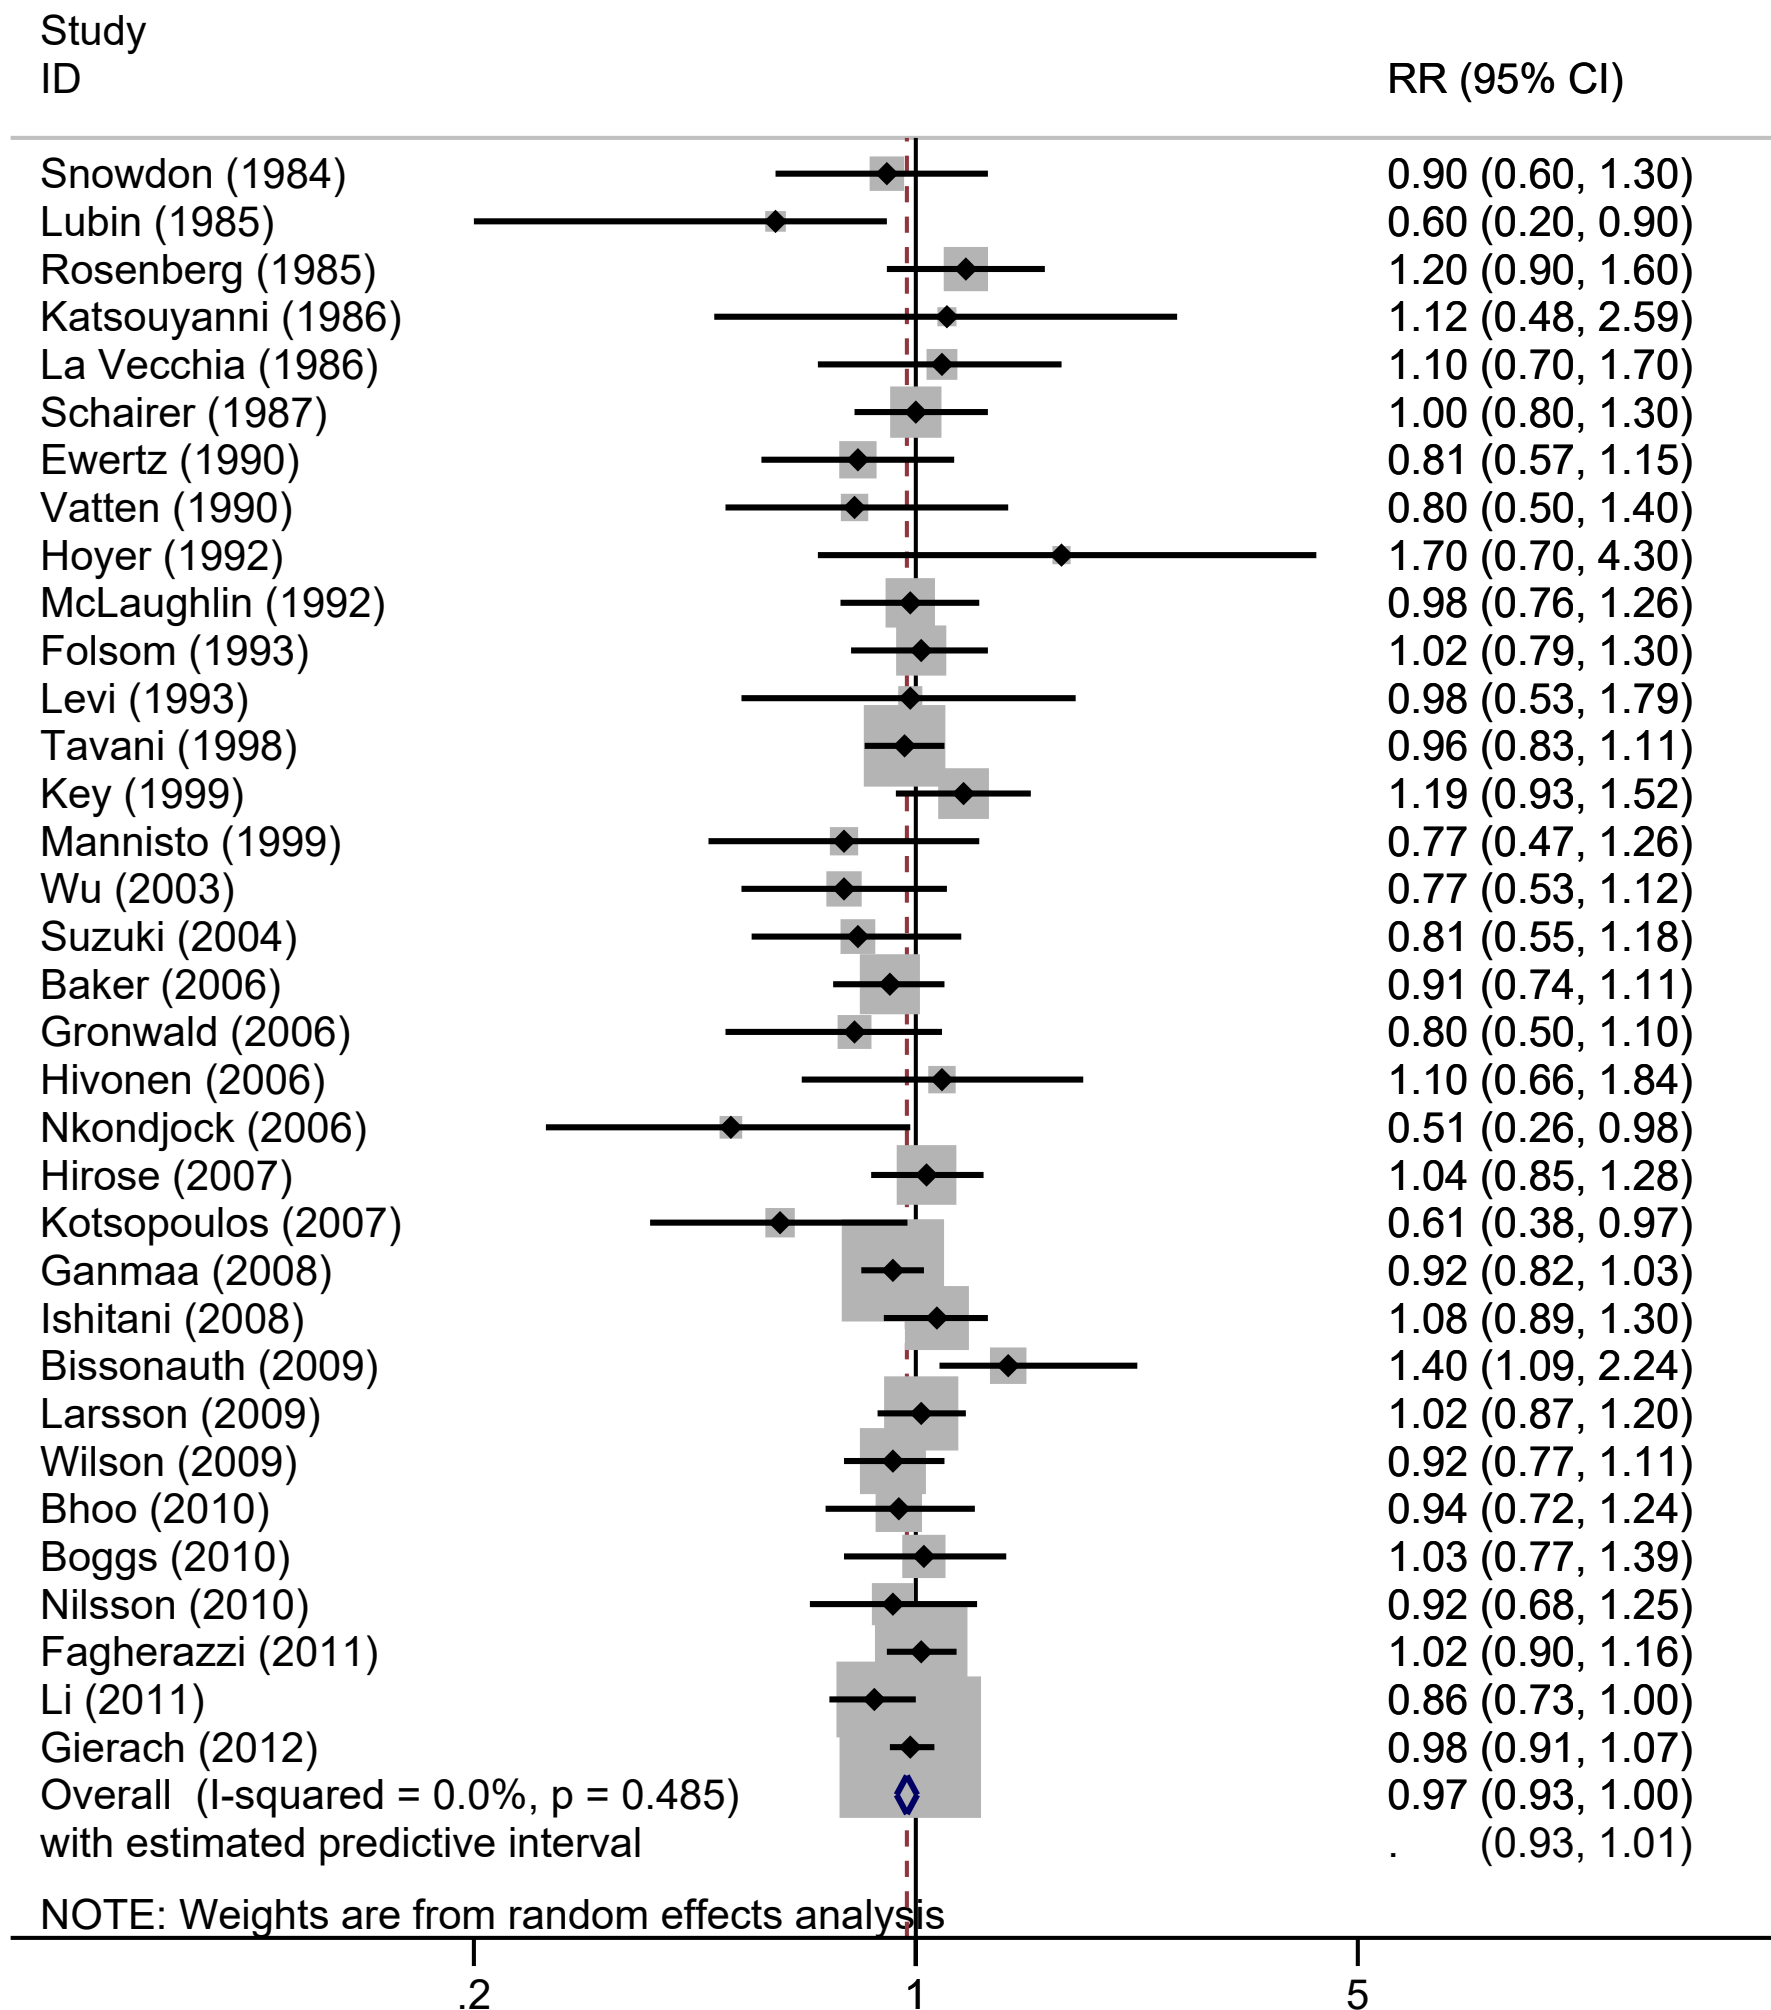

# Supplementary figure 6, Breast cancer, Per 1 cup

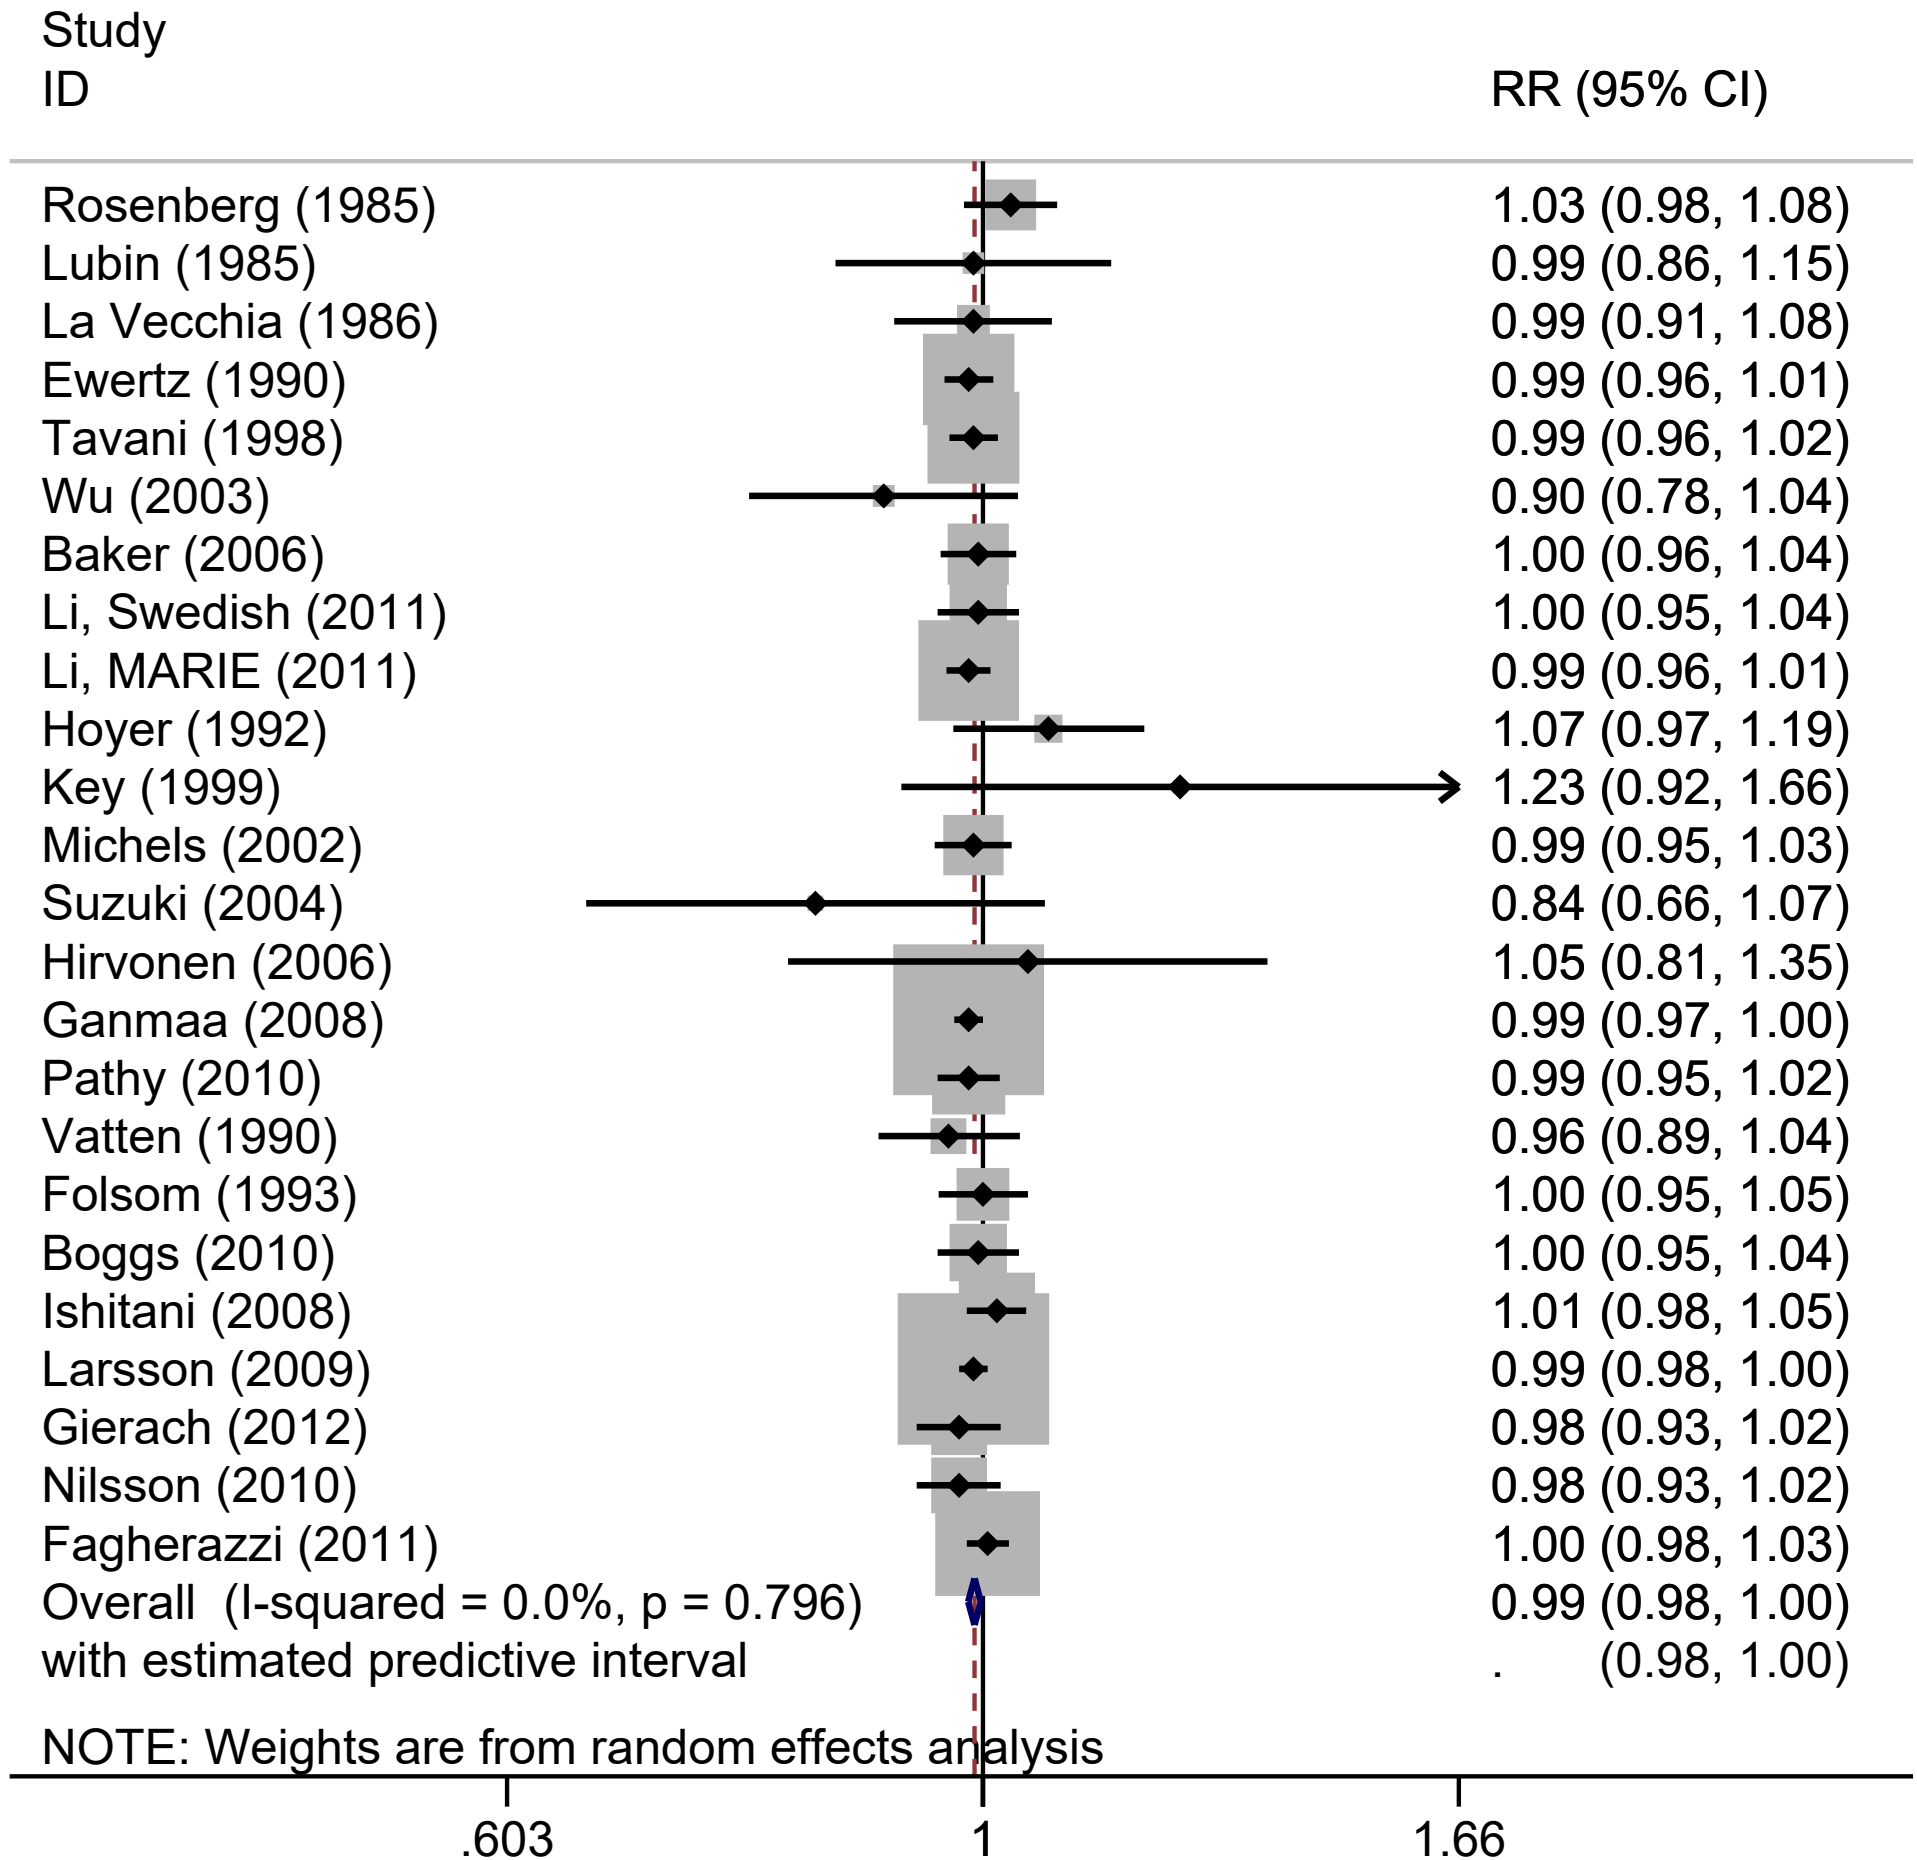

# Supplementary figure 7, Colon cancer, H/L

Study

ID

RR (95% CI)

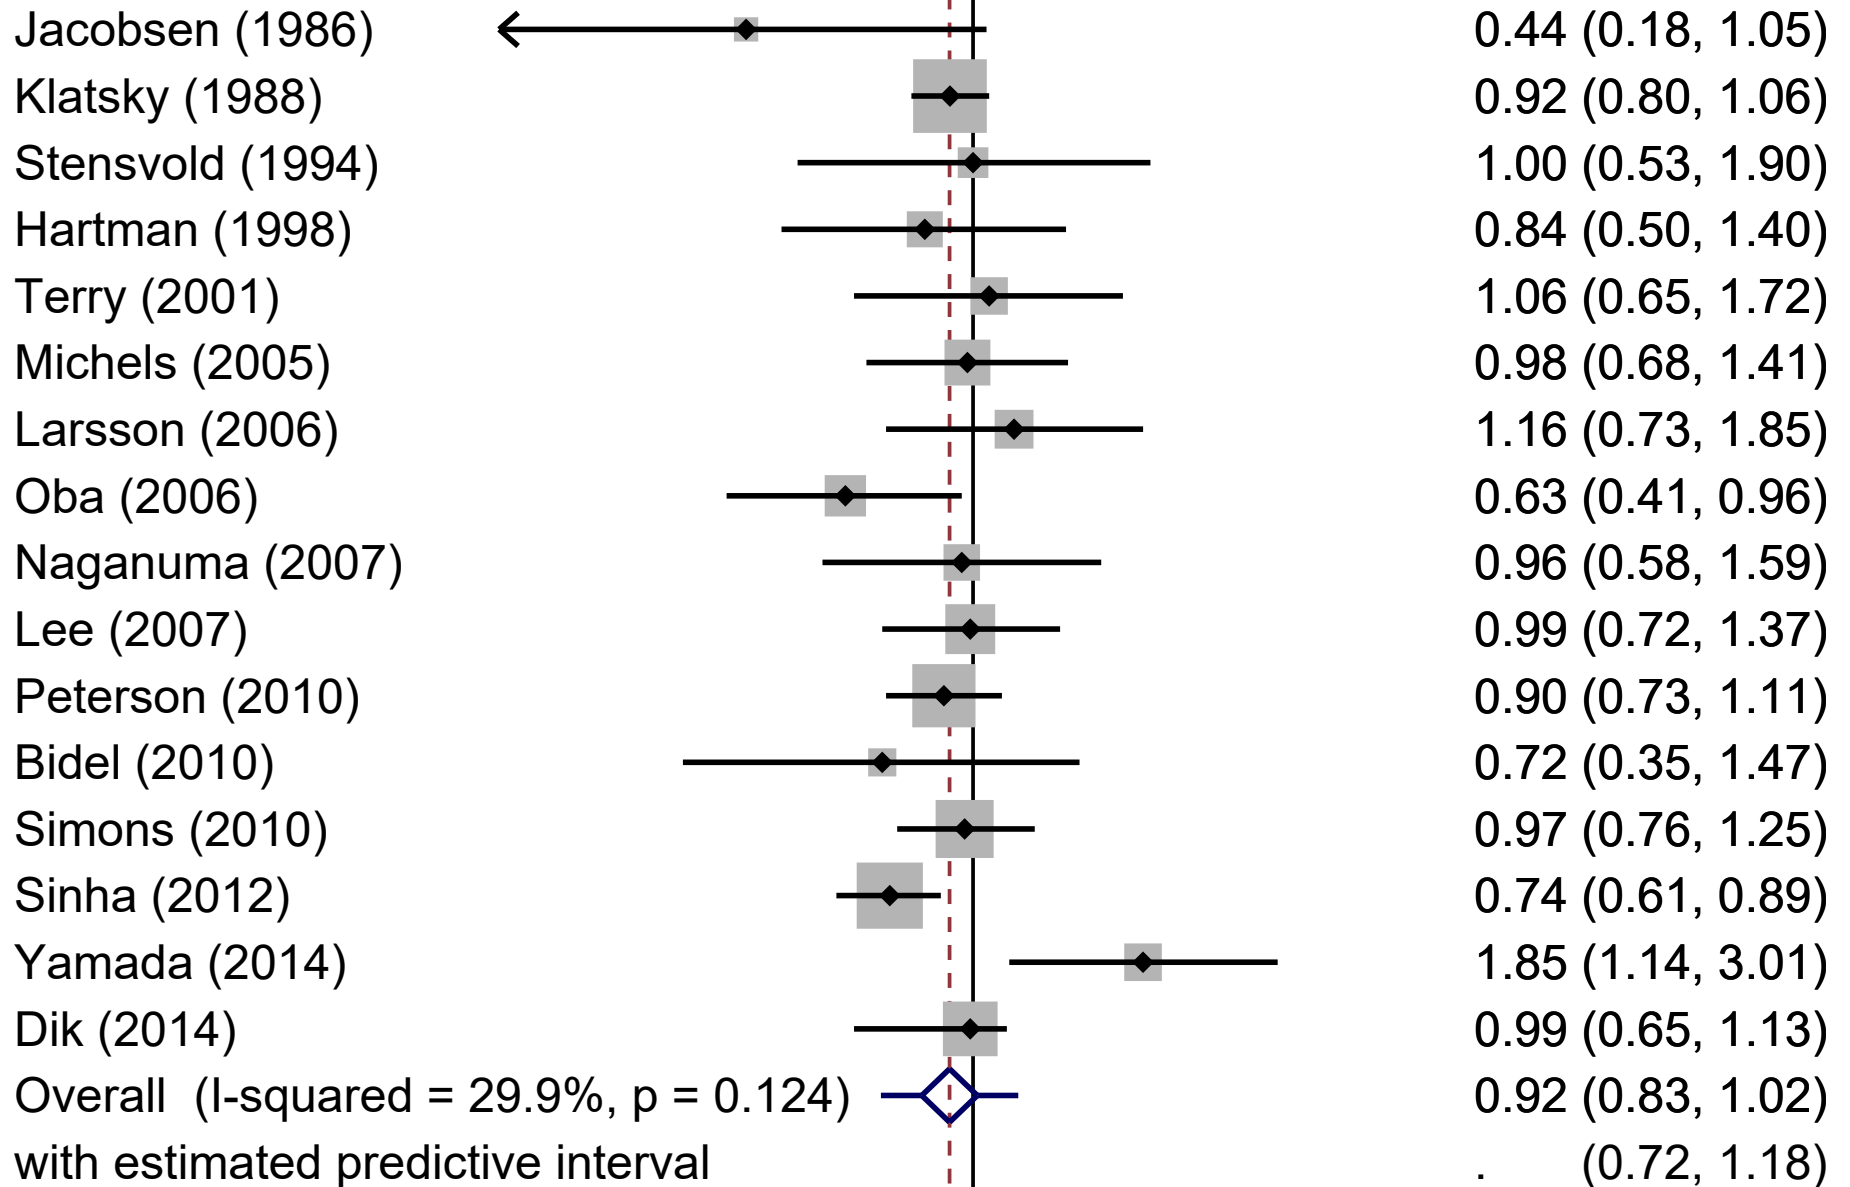

NOTE: Weights are from random effects analysis

.18

1

5.56

# Supplementary figure 8, Colon cancer, Per 1 cup

Study

ID

RR (95% CI)

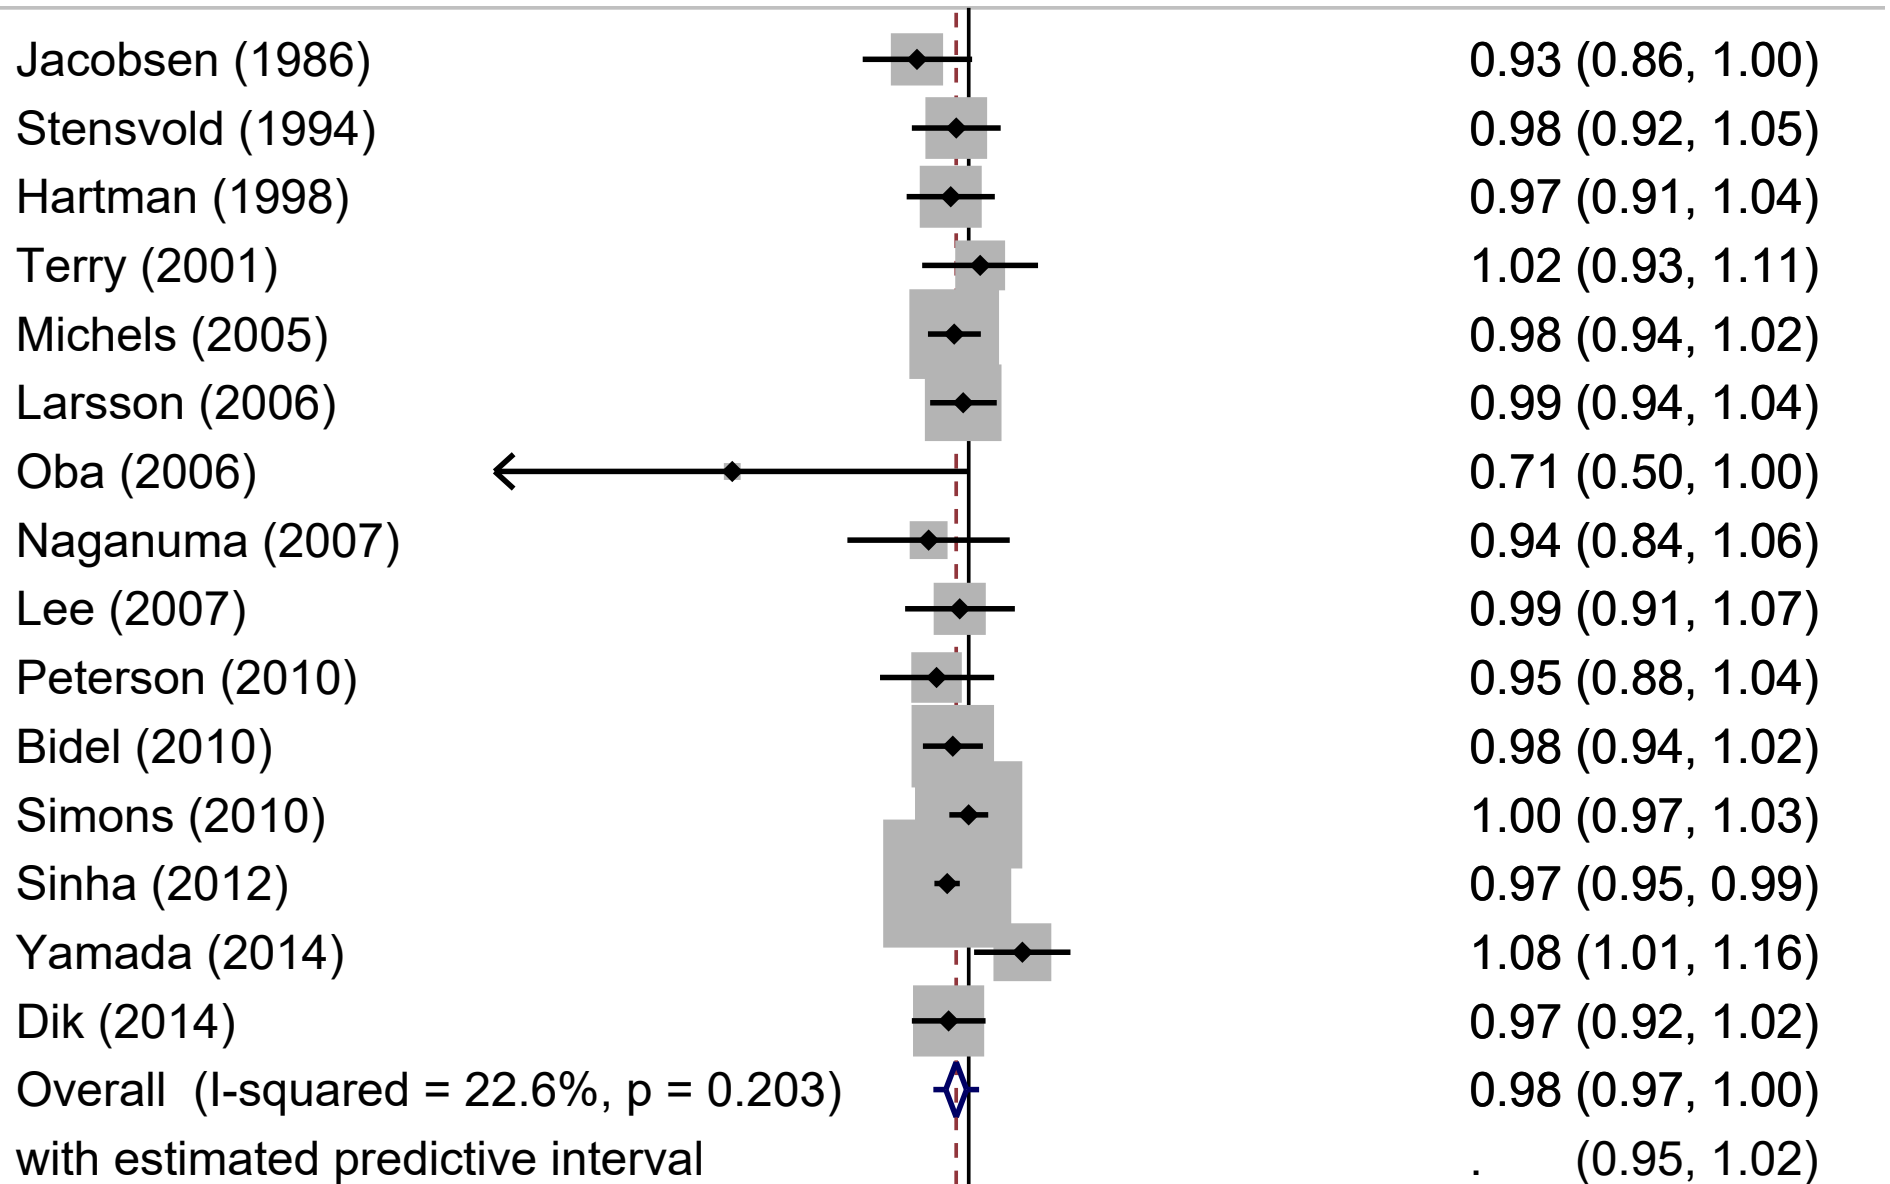

NOTE: Weights are from random effects analysis

.499

1

2



# Supplementary figure 9, Colorectal cancer, H/L

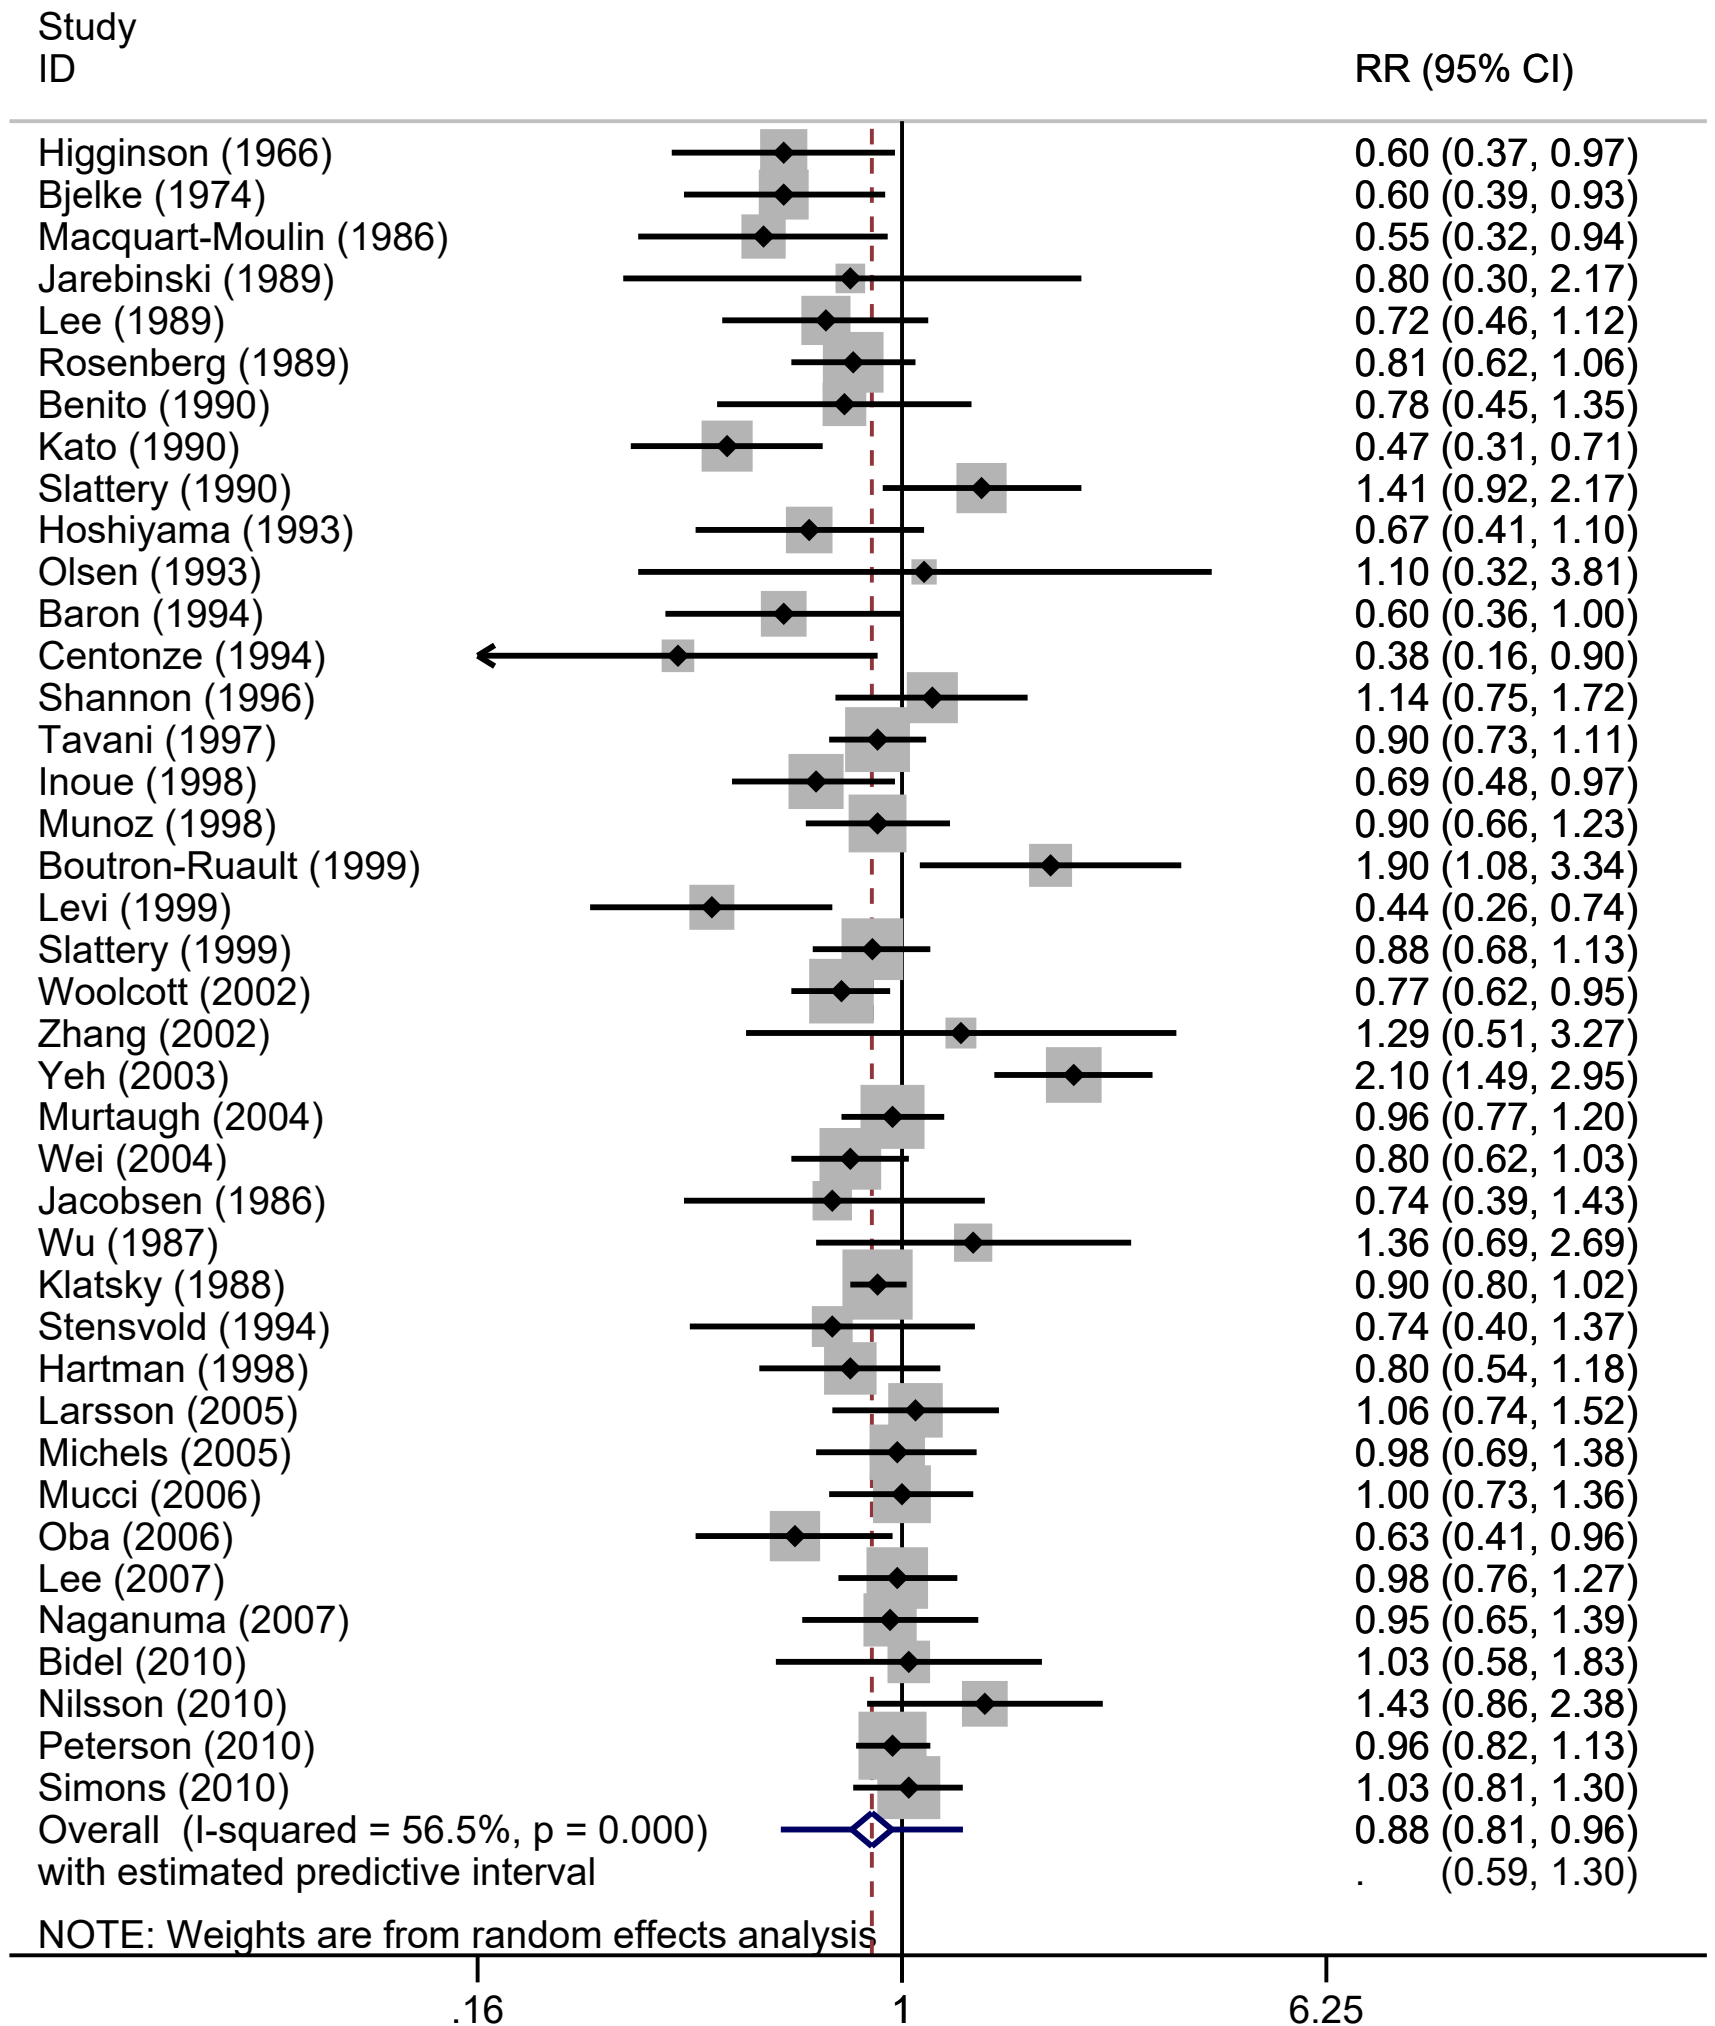

# Supplementary figure 10, Colorectal cancer, Per 1 cup

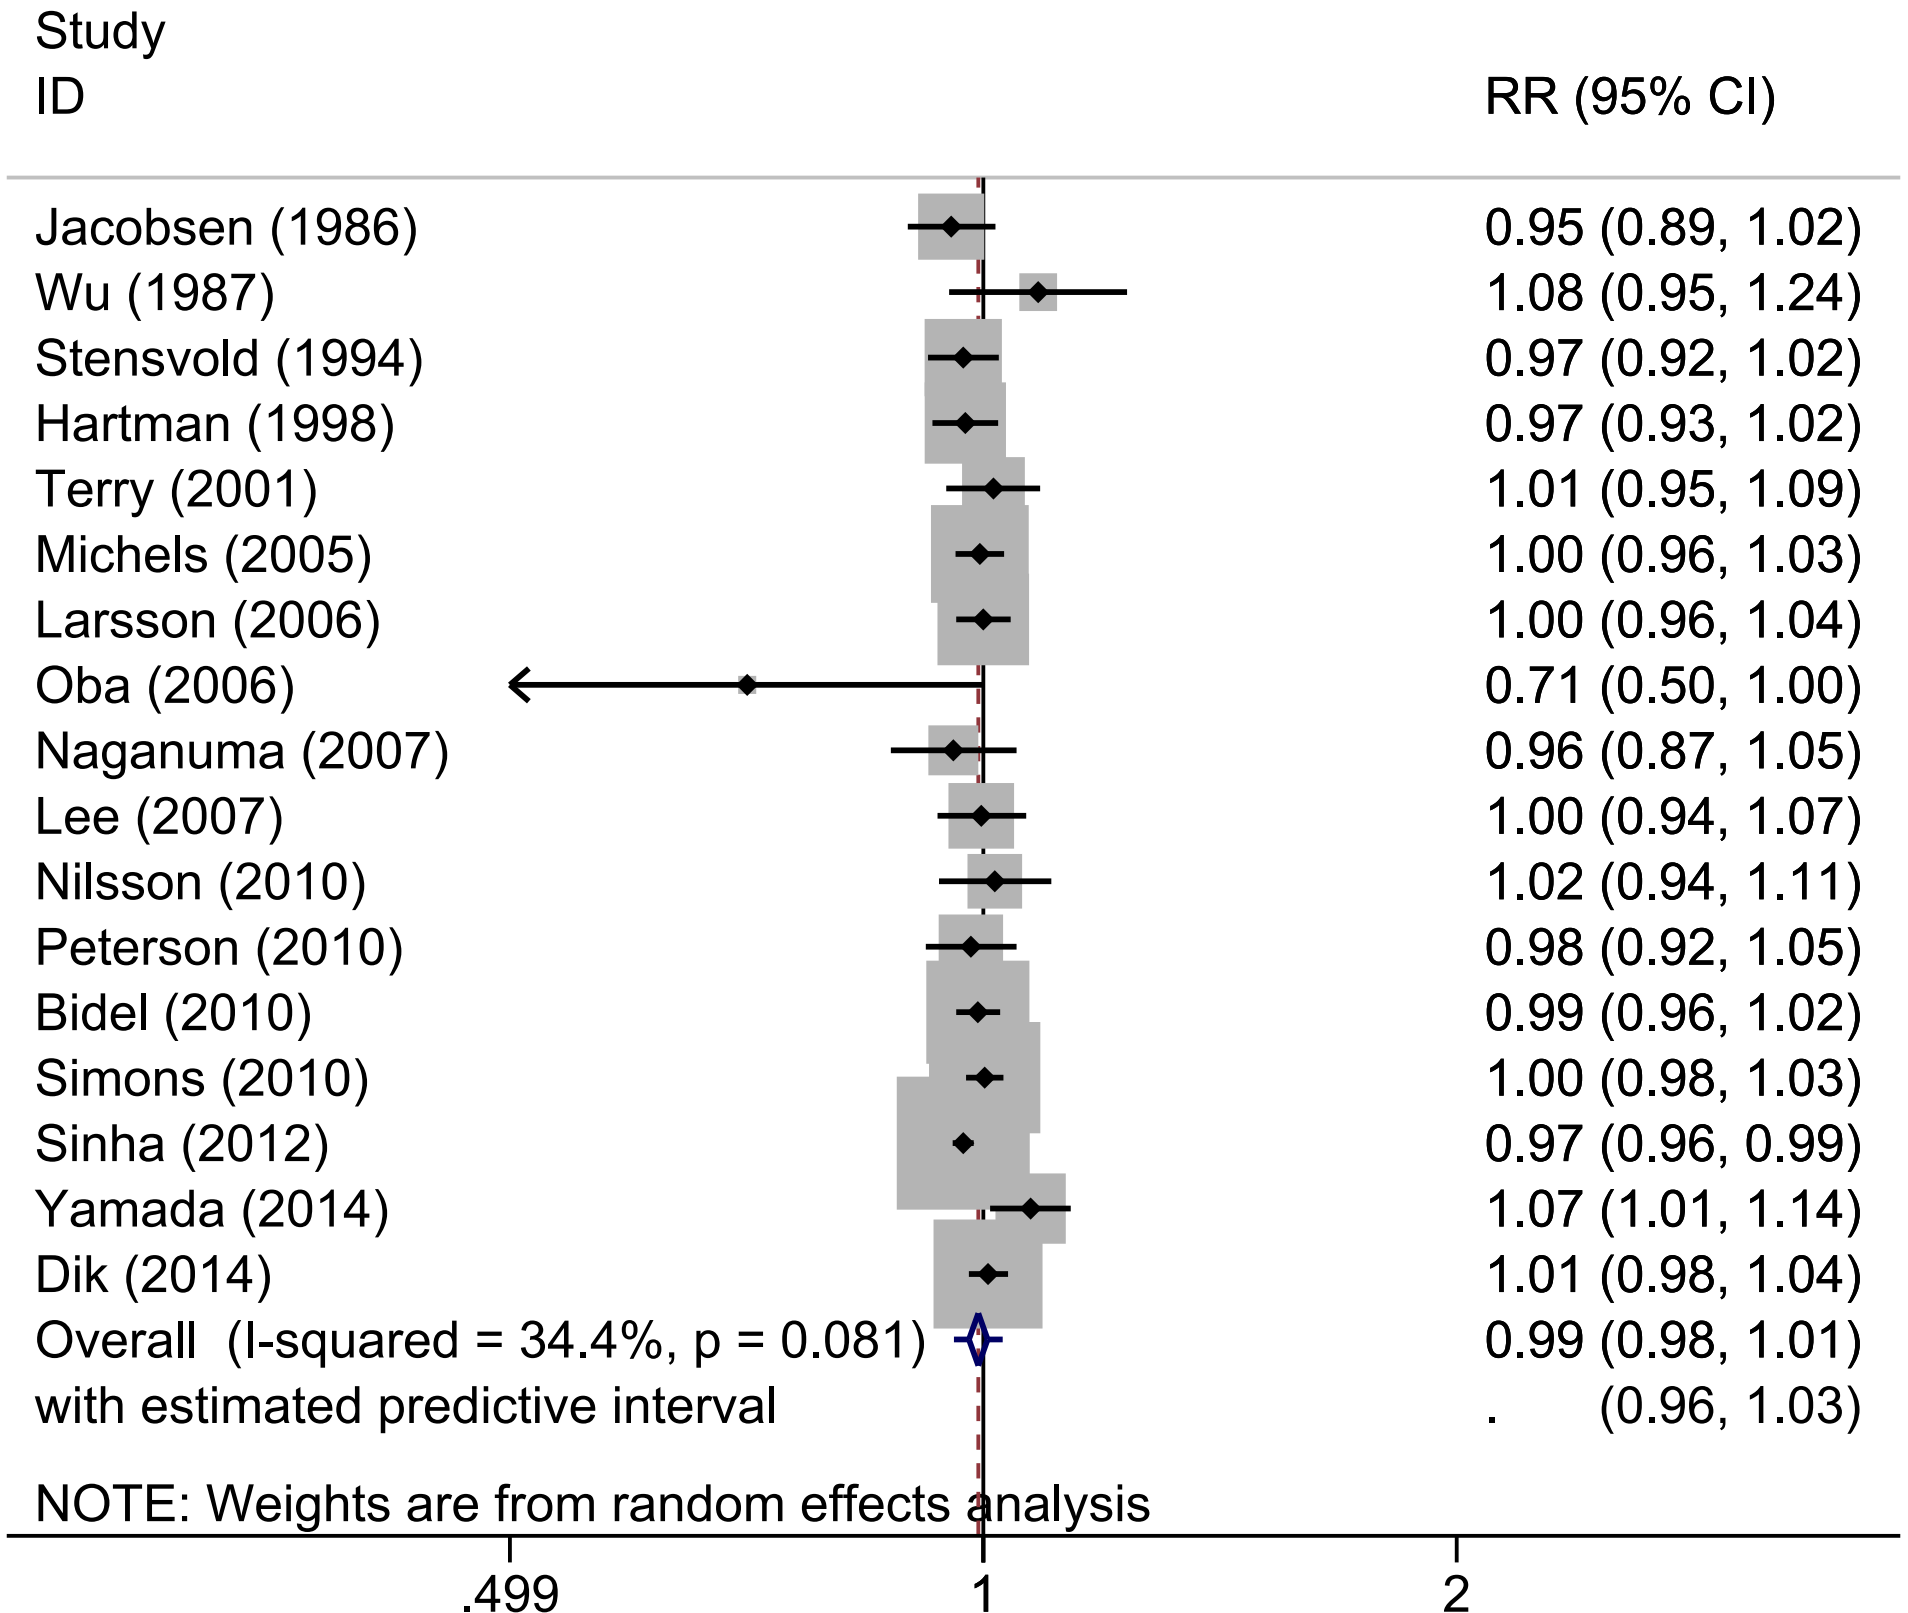

# Supplementary figure 11, Endometrial cancer, H/L

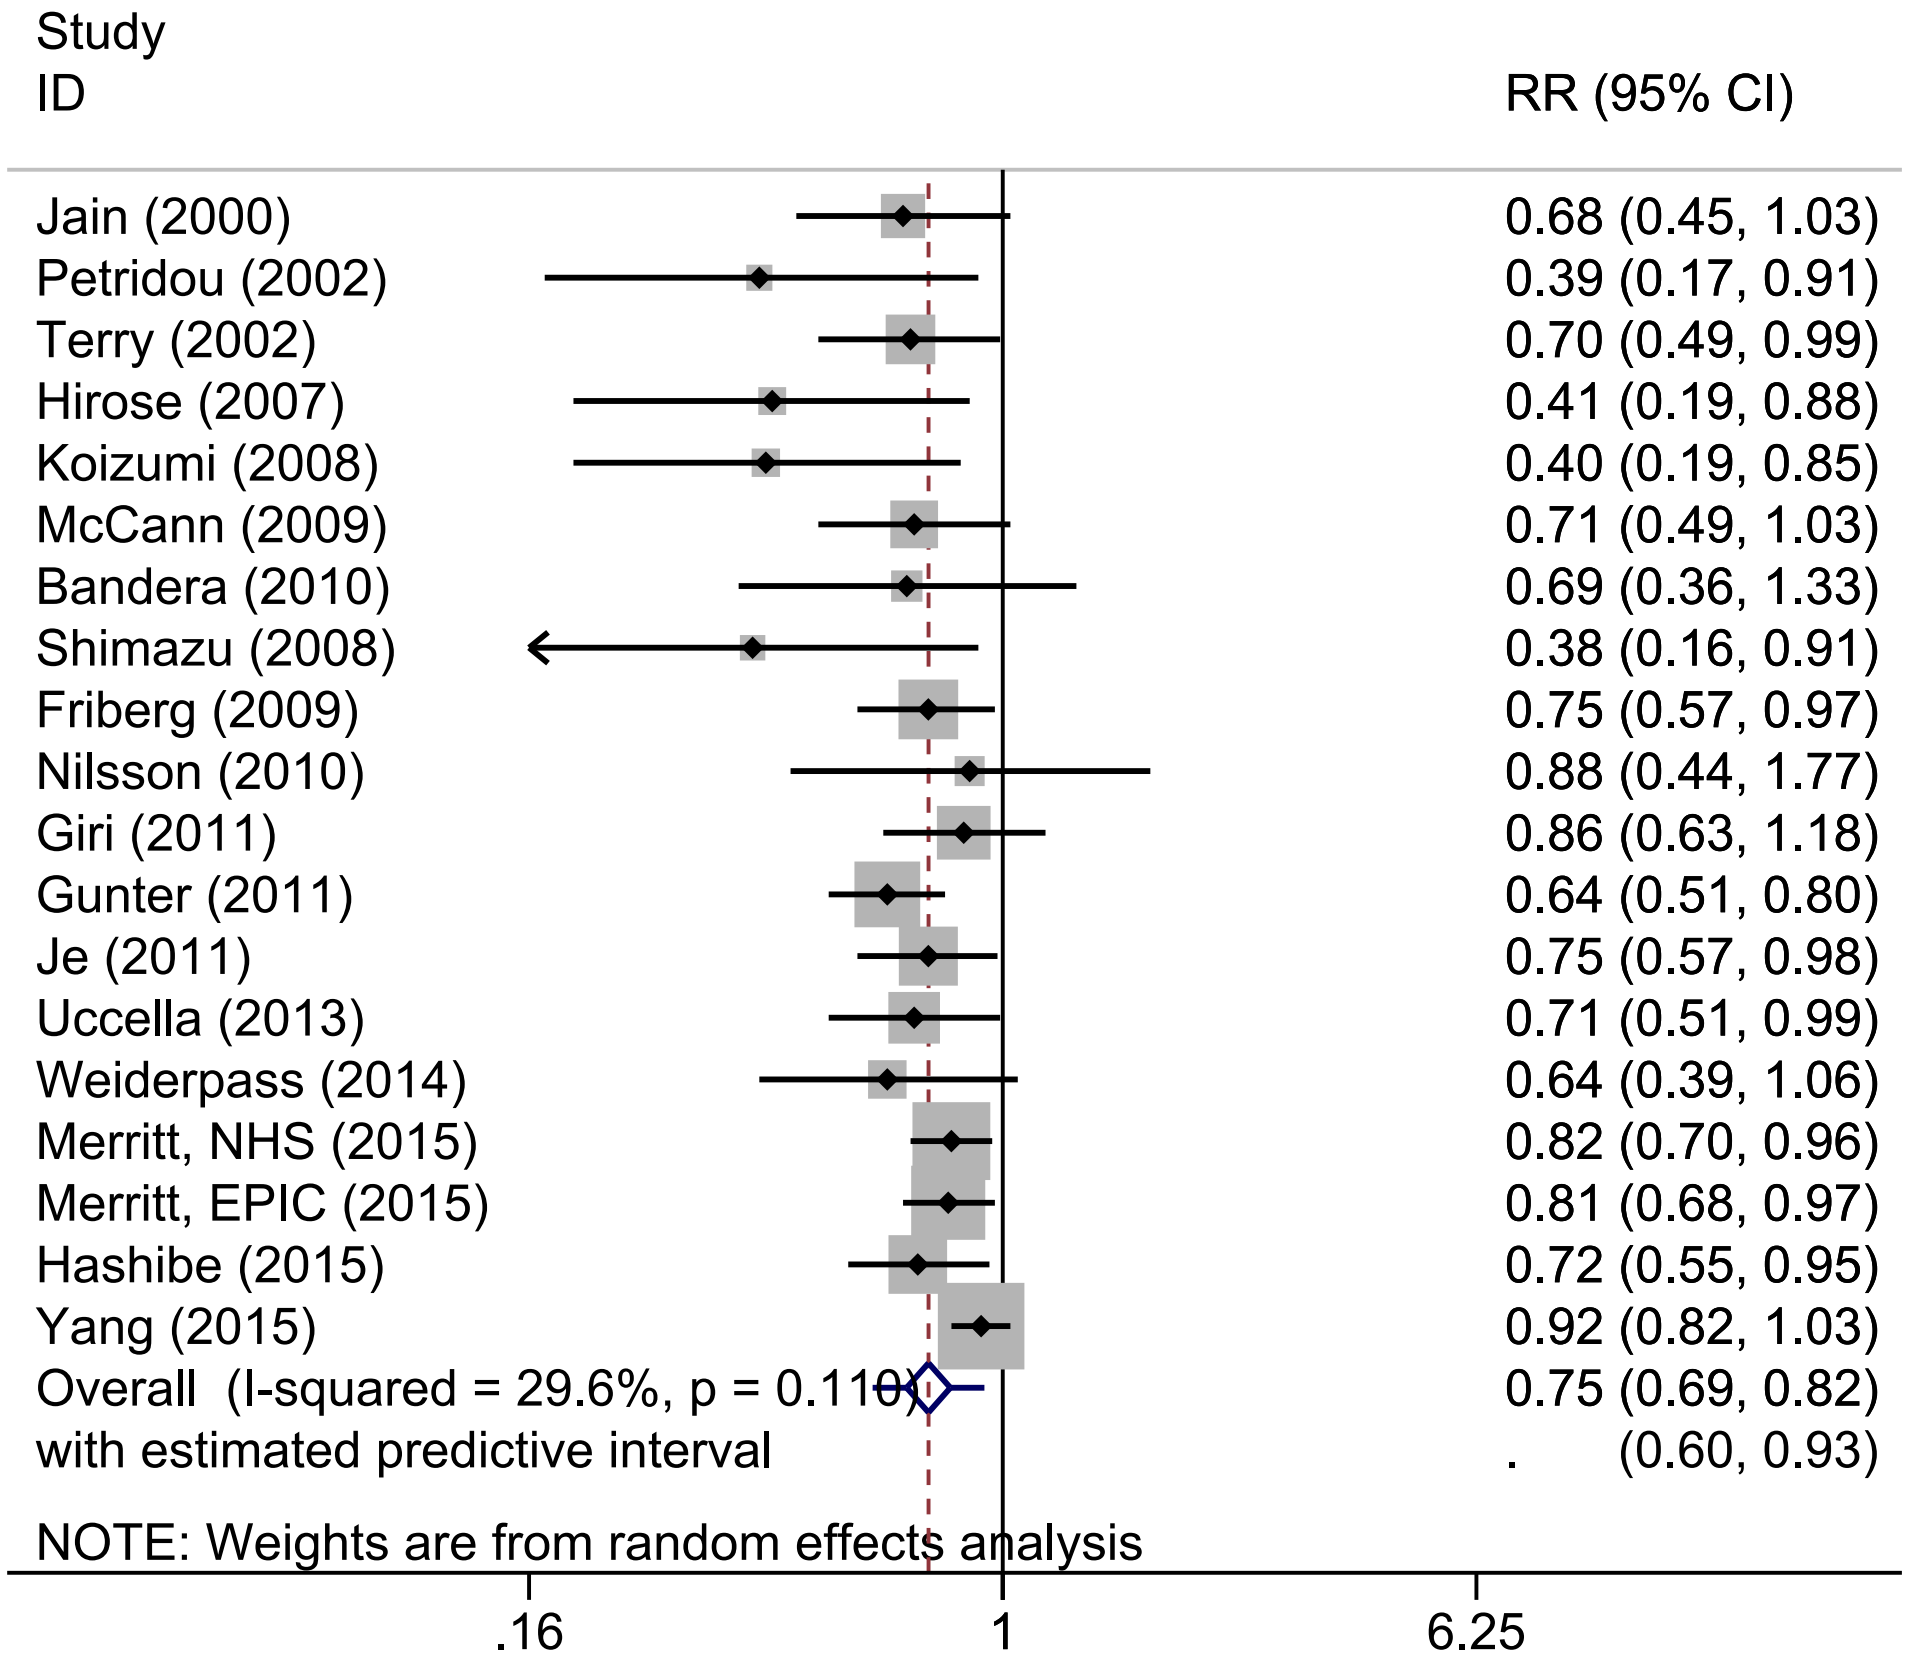

# Supplementary figure 12, Endometrial cancer, Per 1 cup

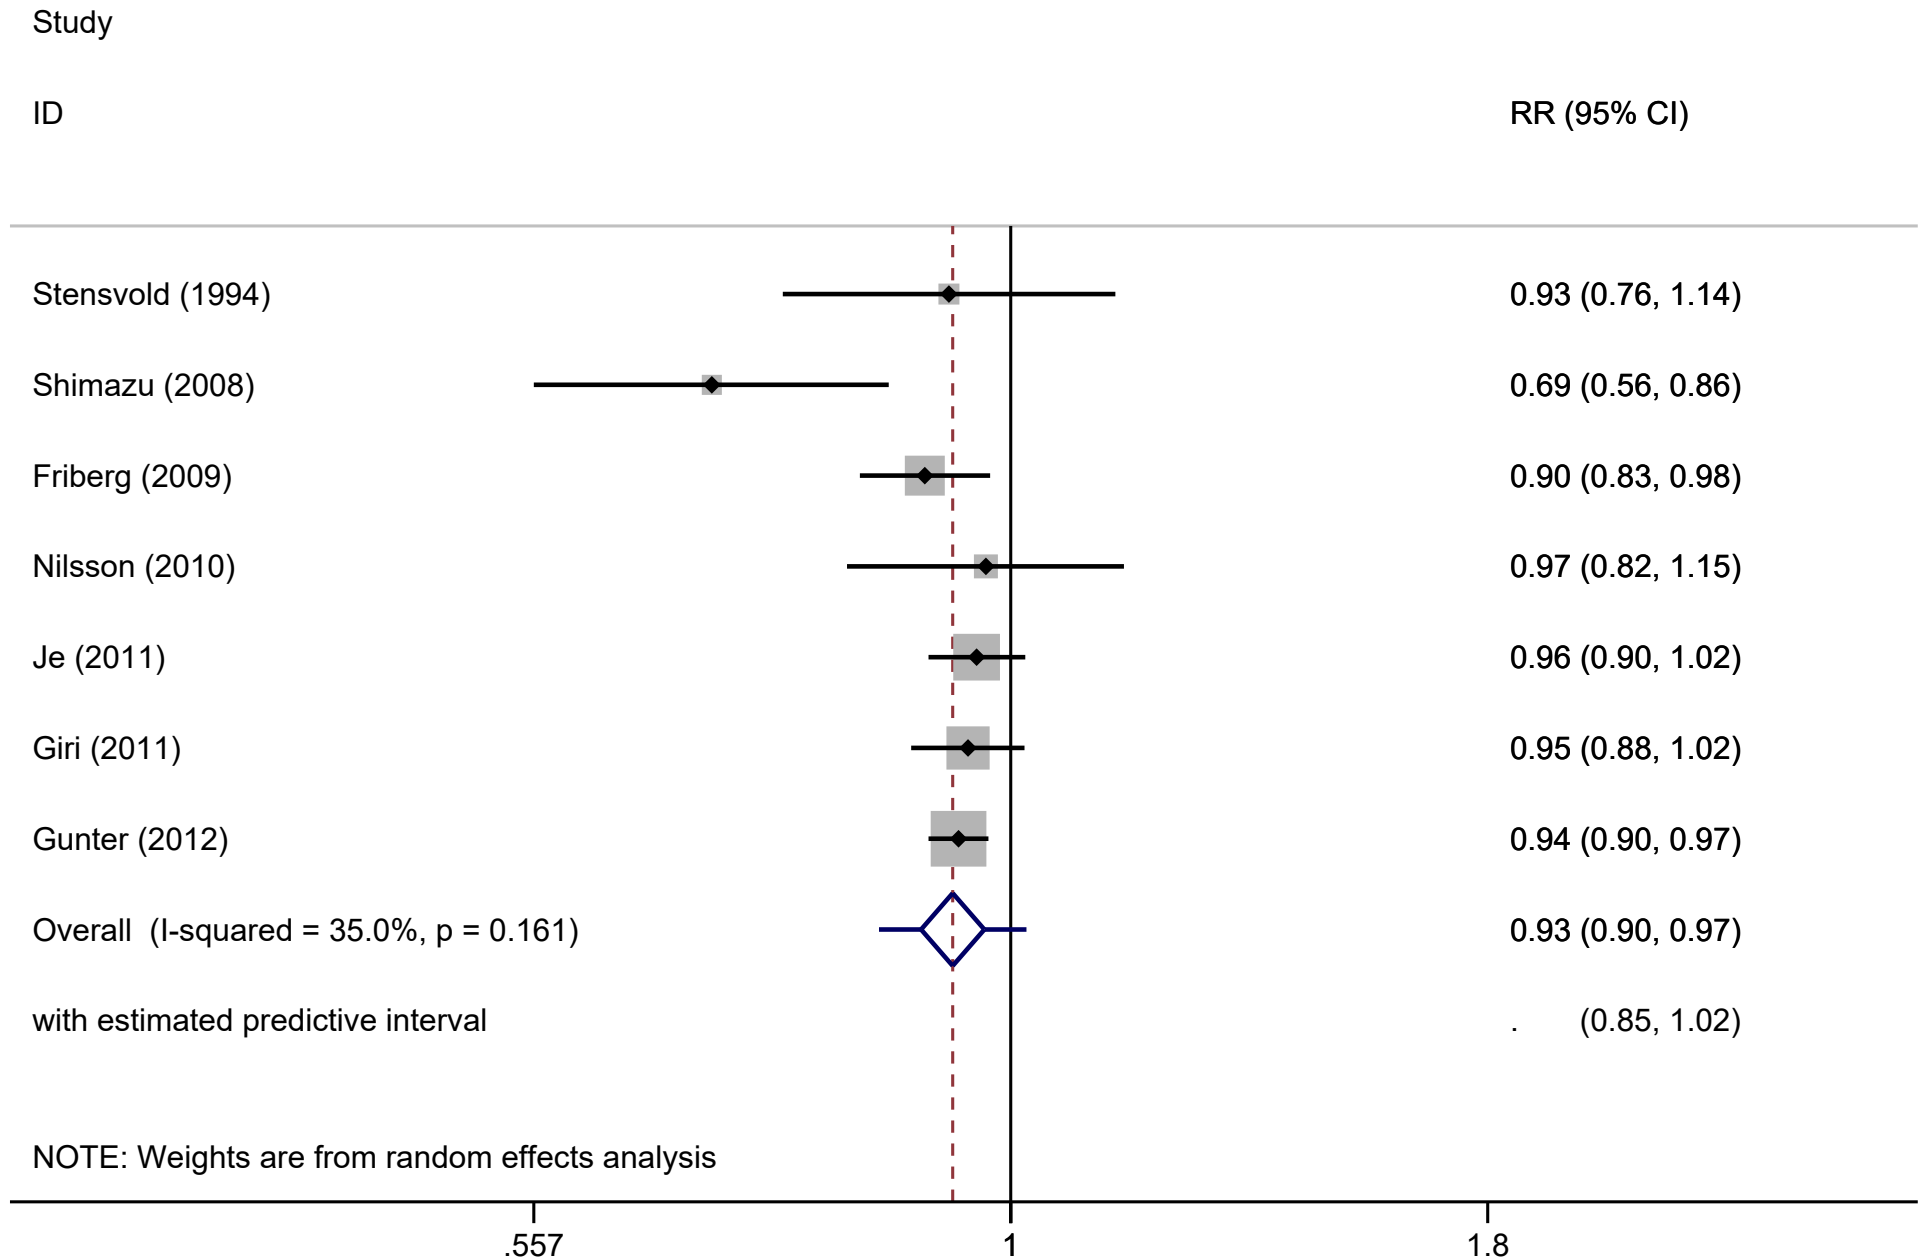

# Supplementary figure 13, Esophageal cancer, H/L

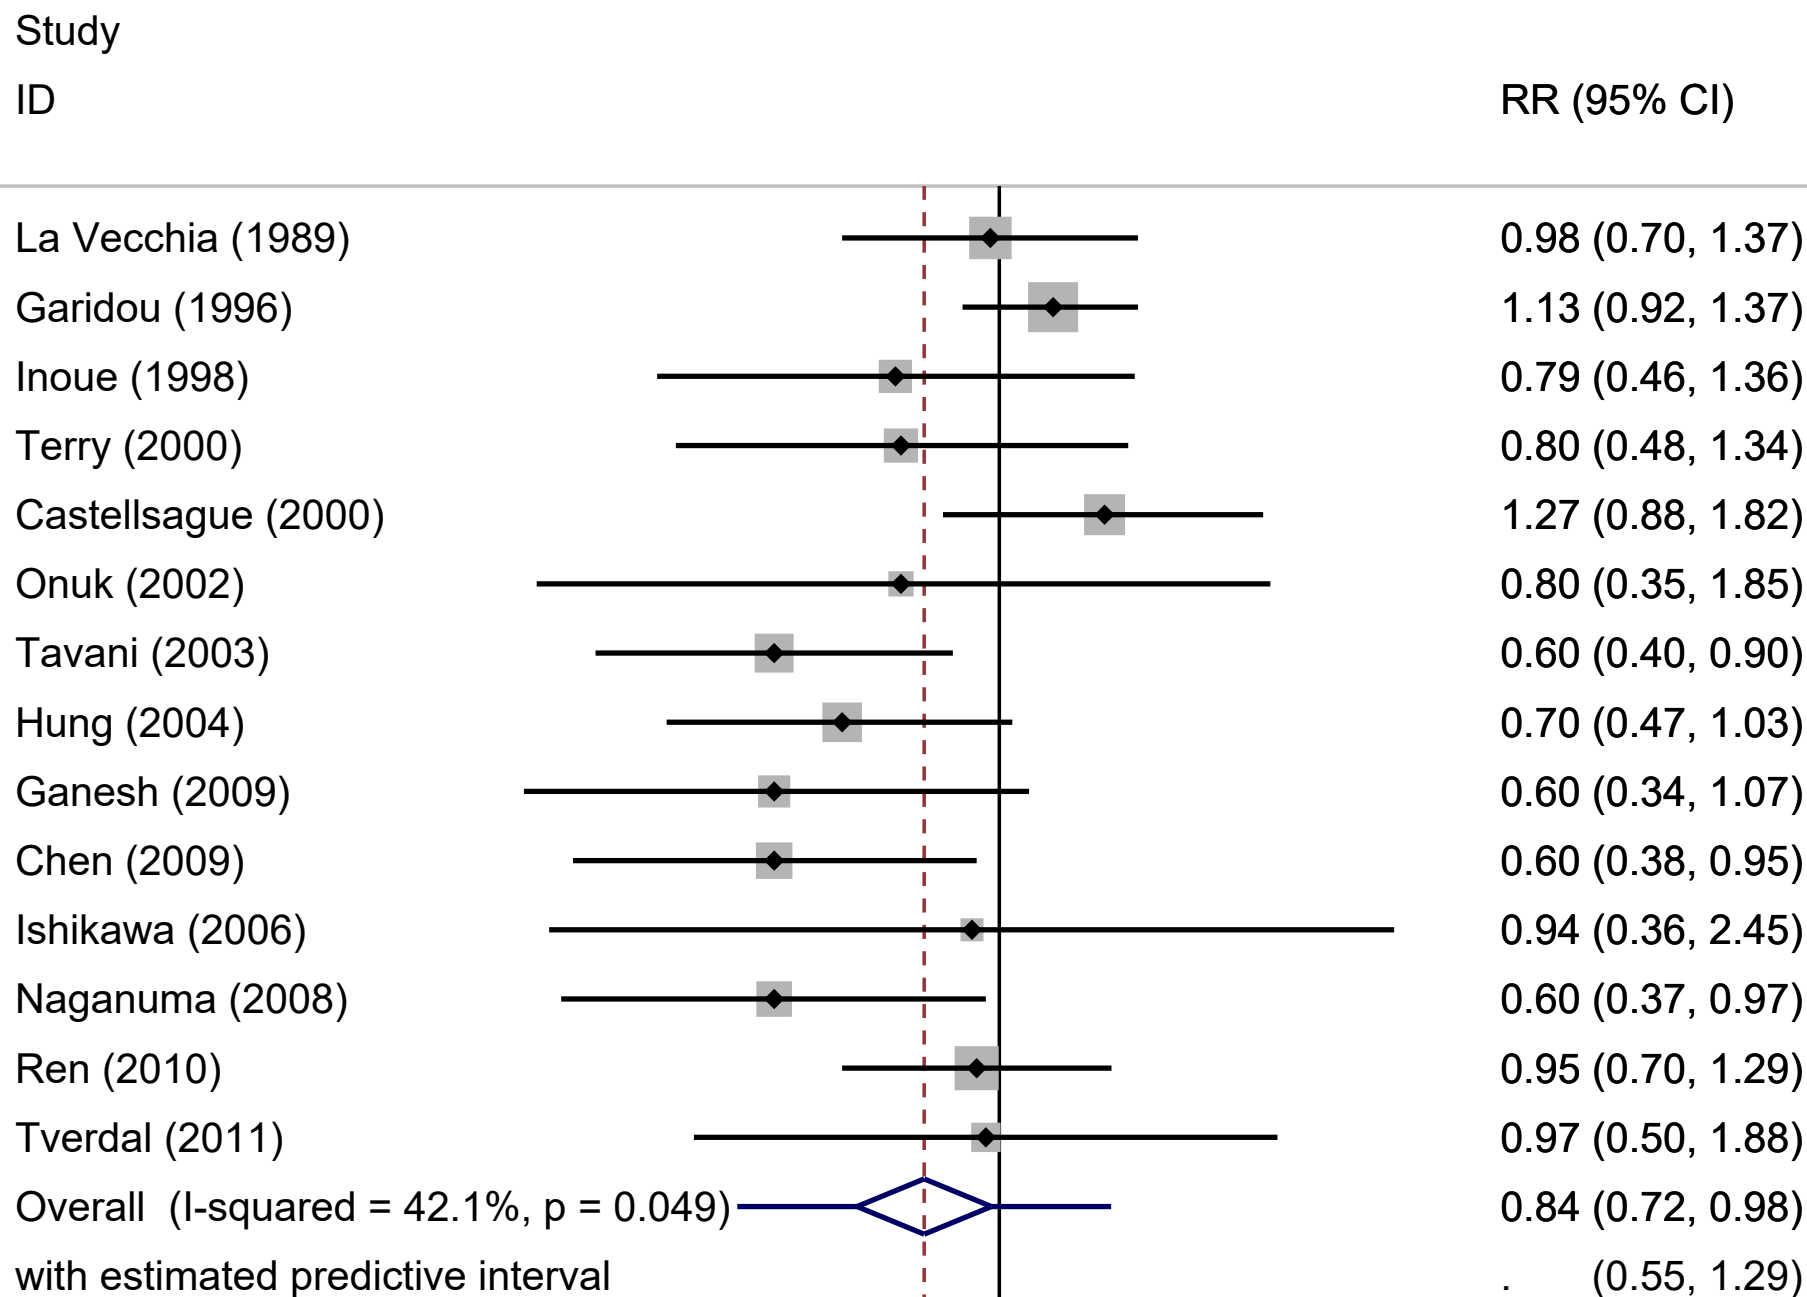

NOTE: Weights are from random effects analysis

# Supplementary figure 14, Gastric cancer, H/L

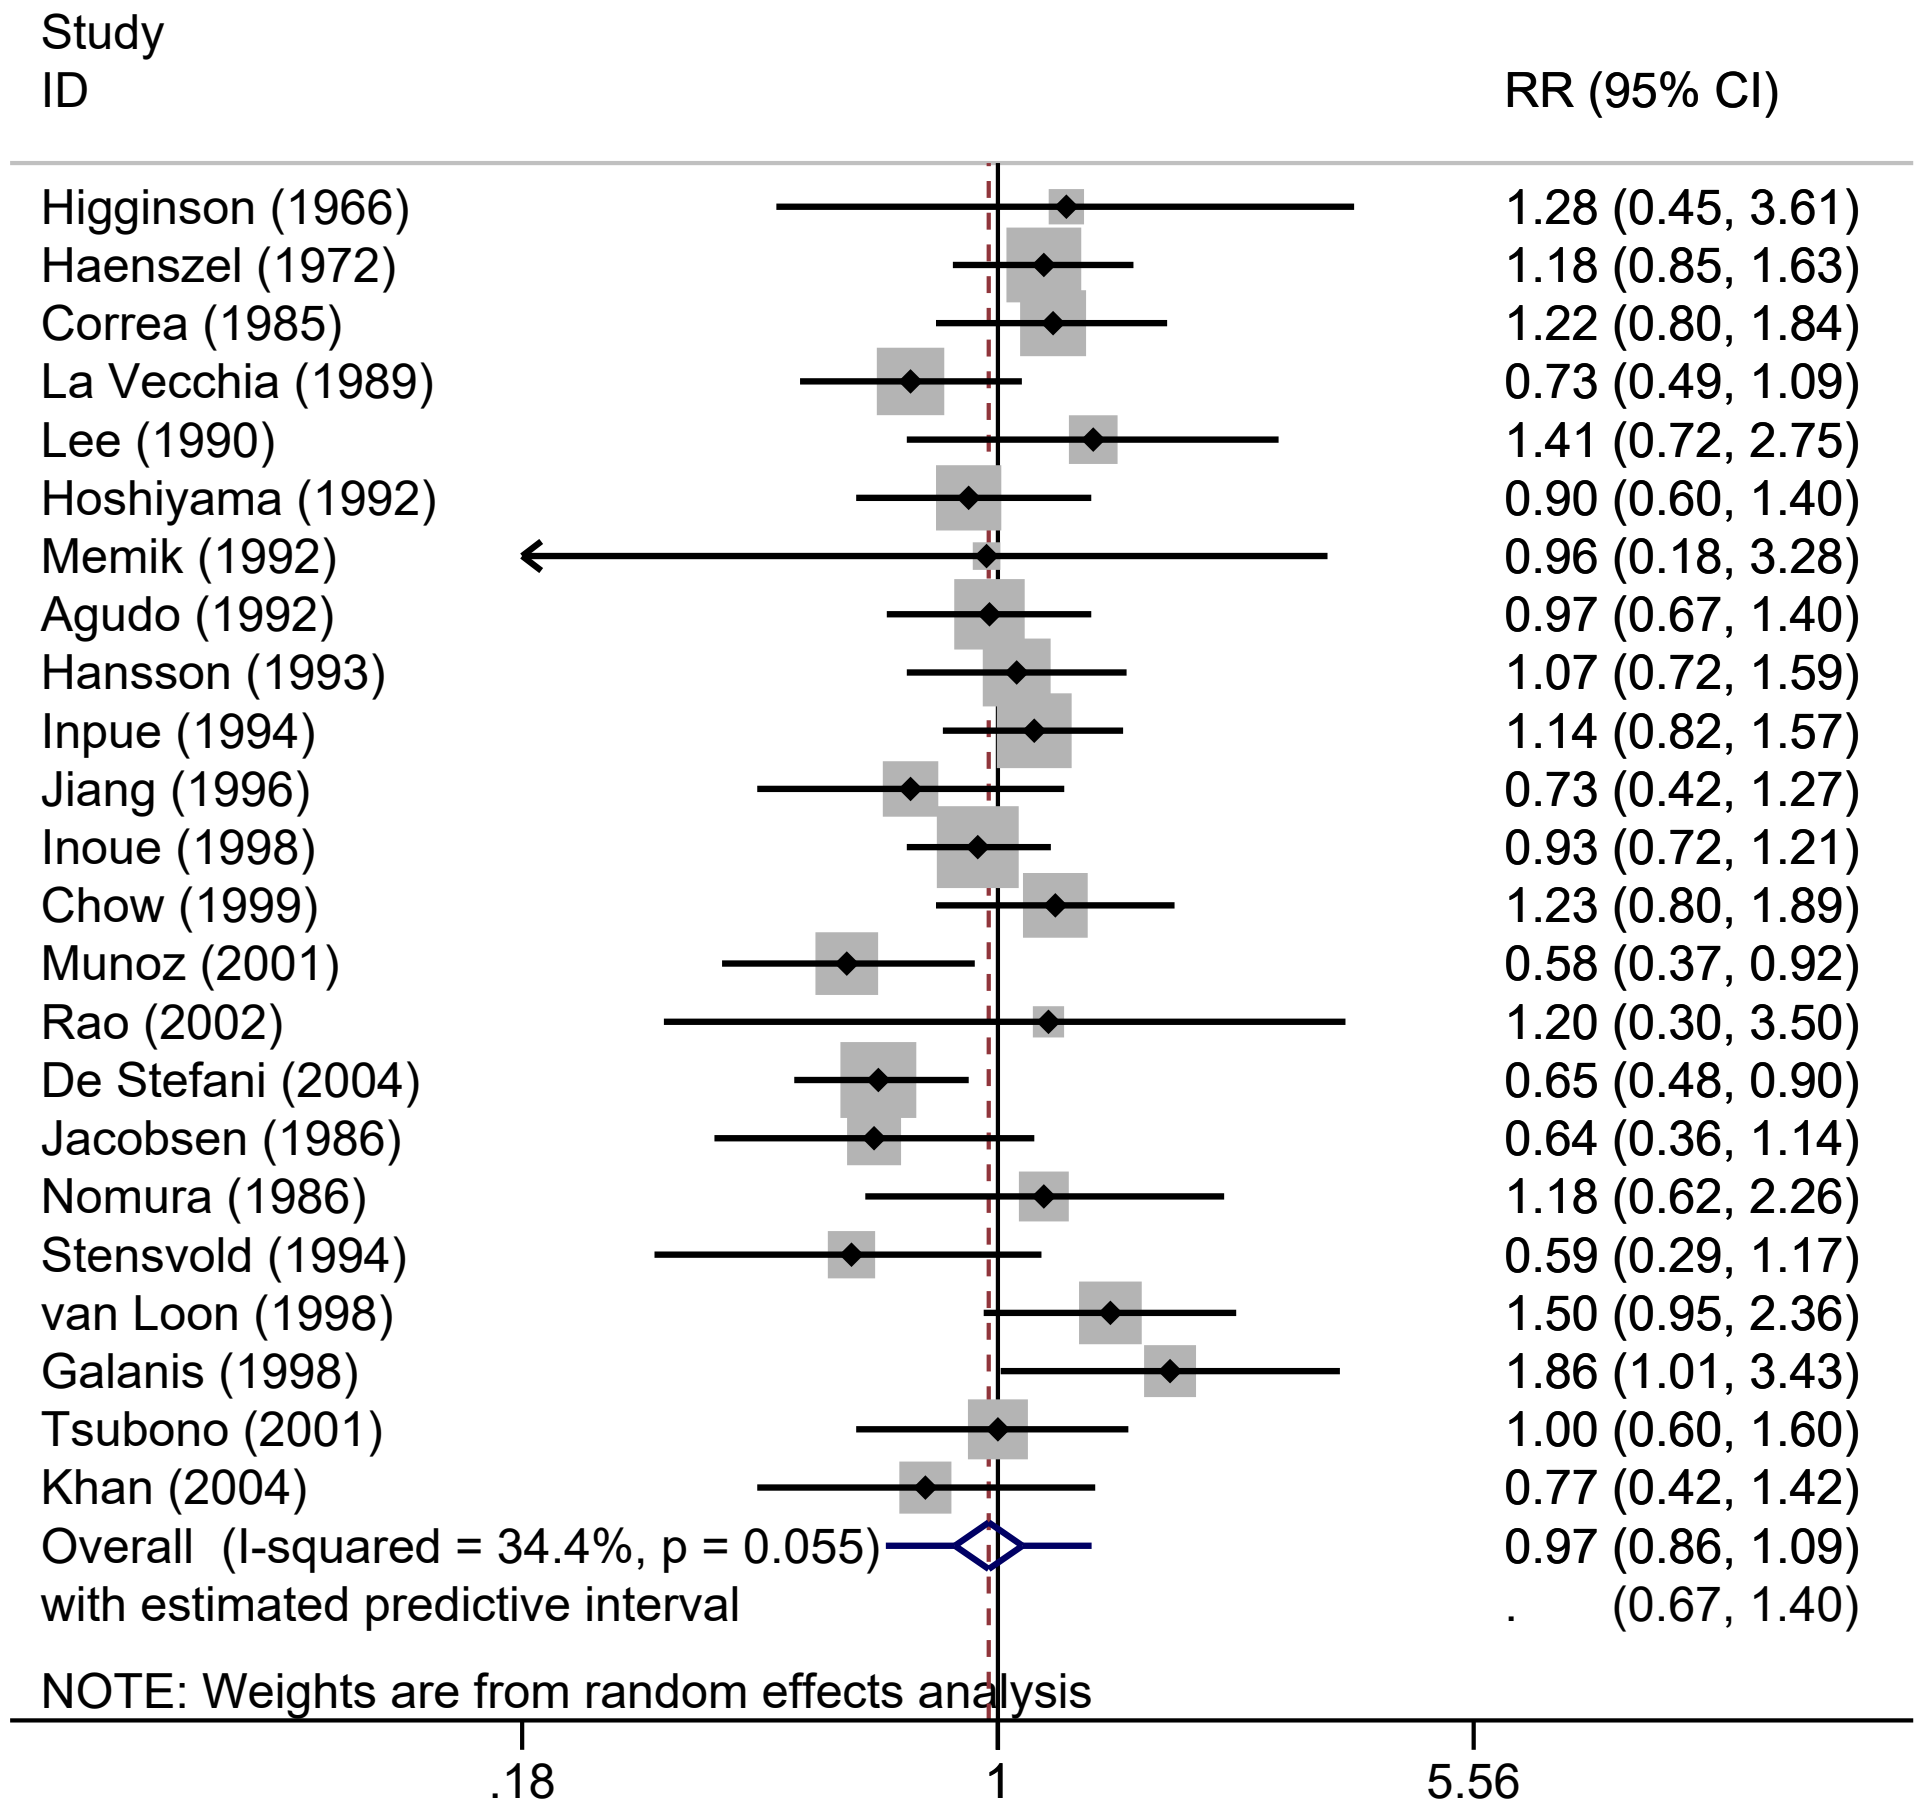

# Supplementary figure 15, Gastric cancer, Per 1 cup

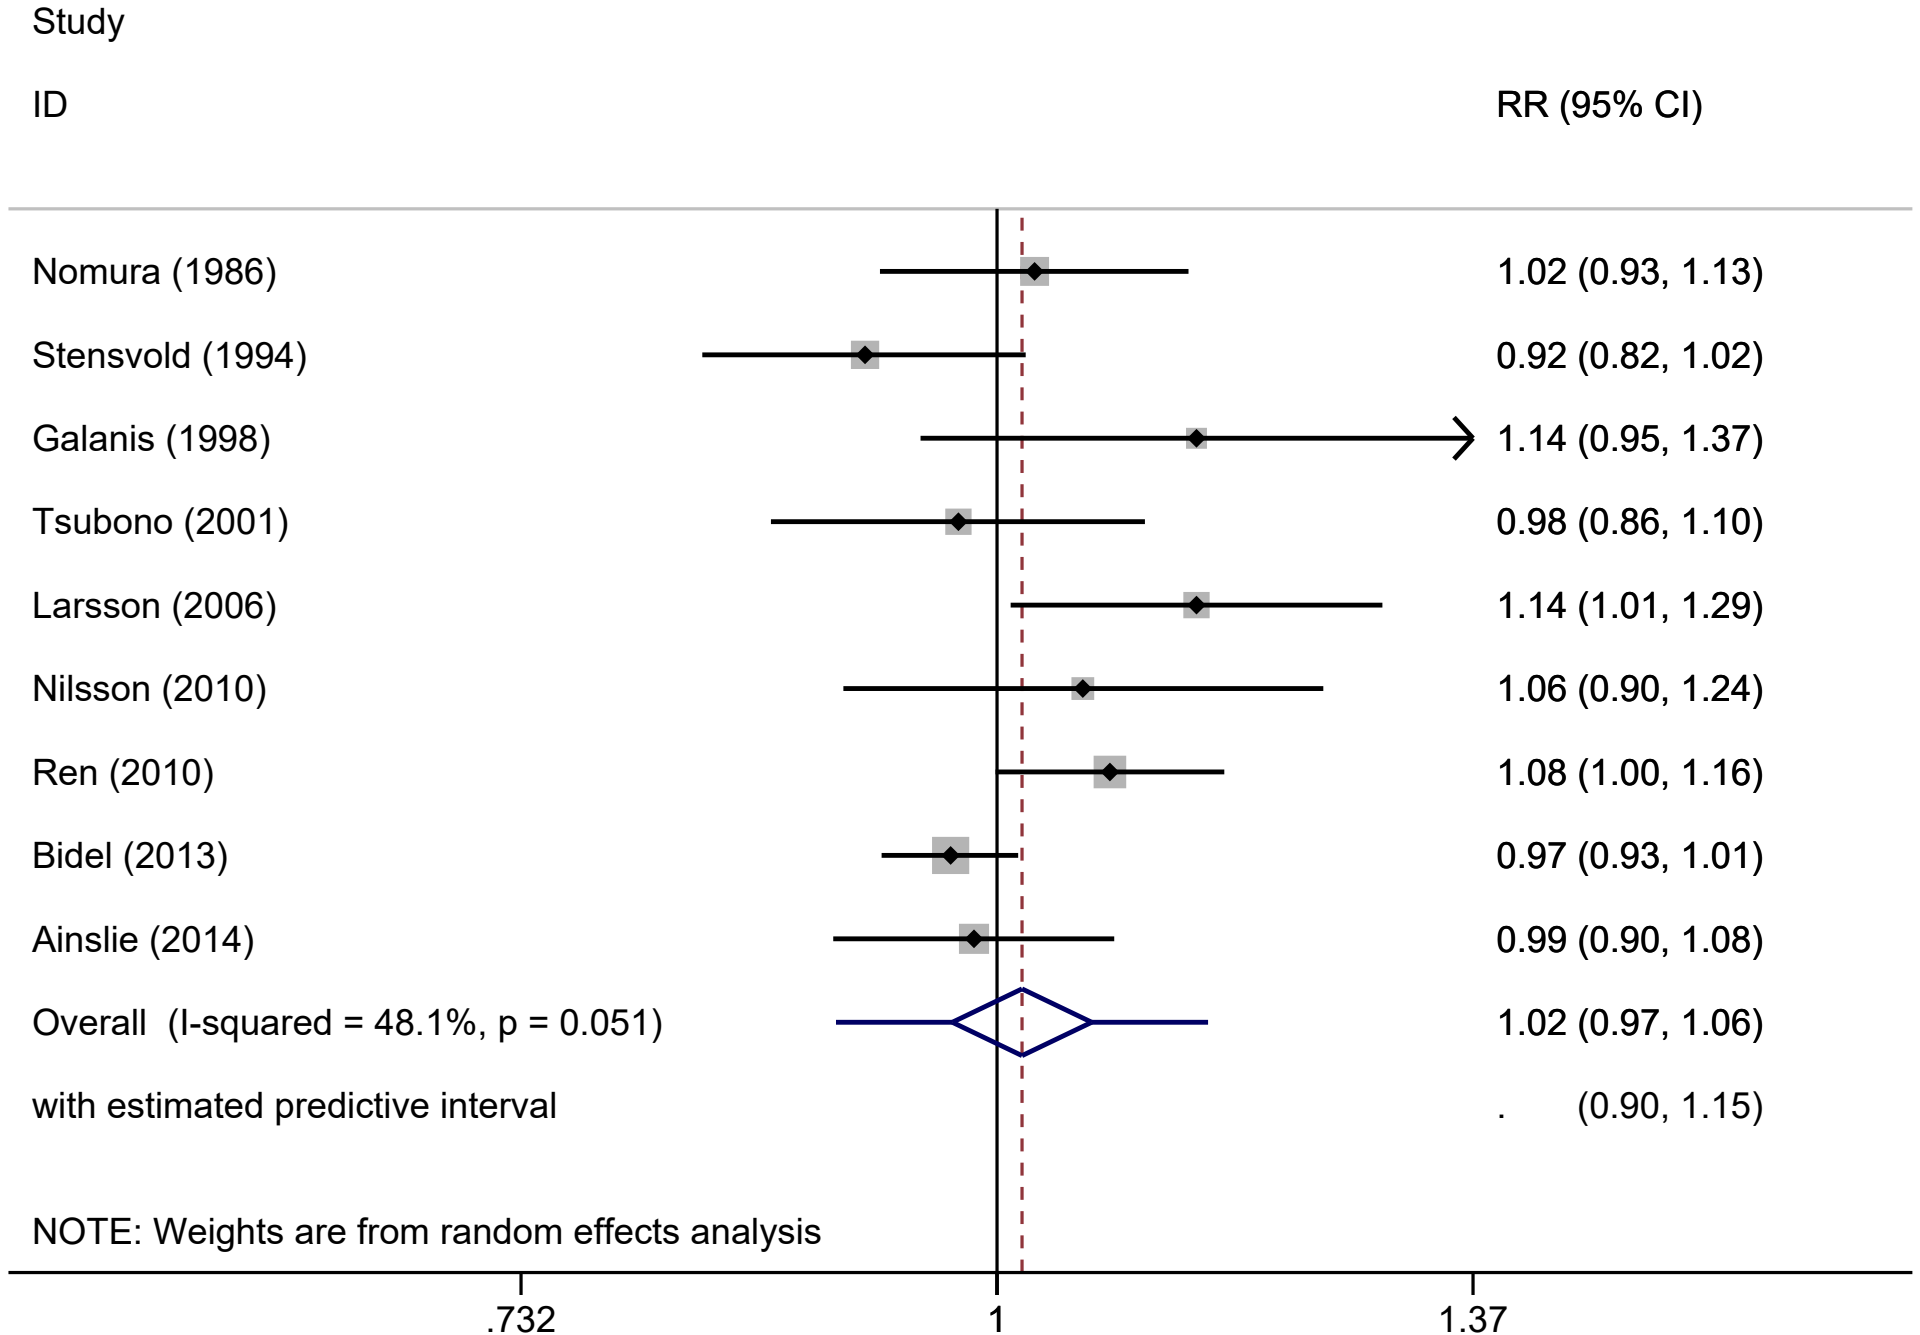

# Supplementary figure 16, Glioma, H/L

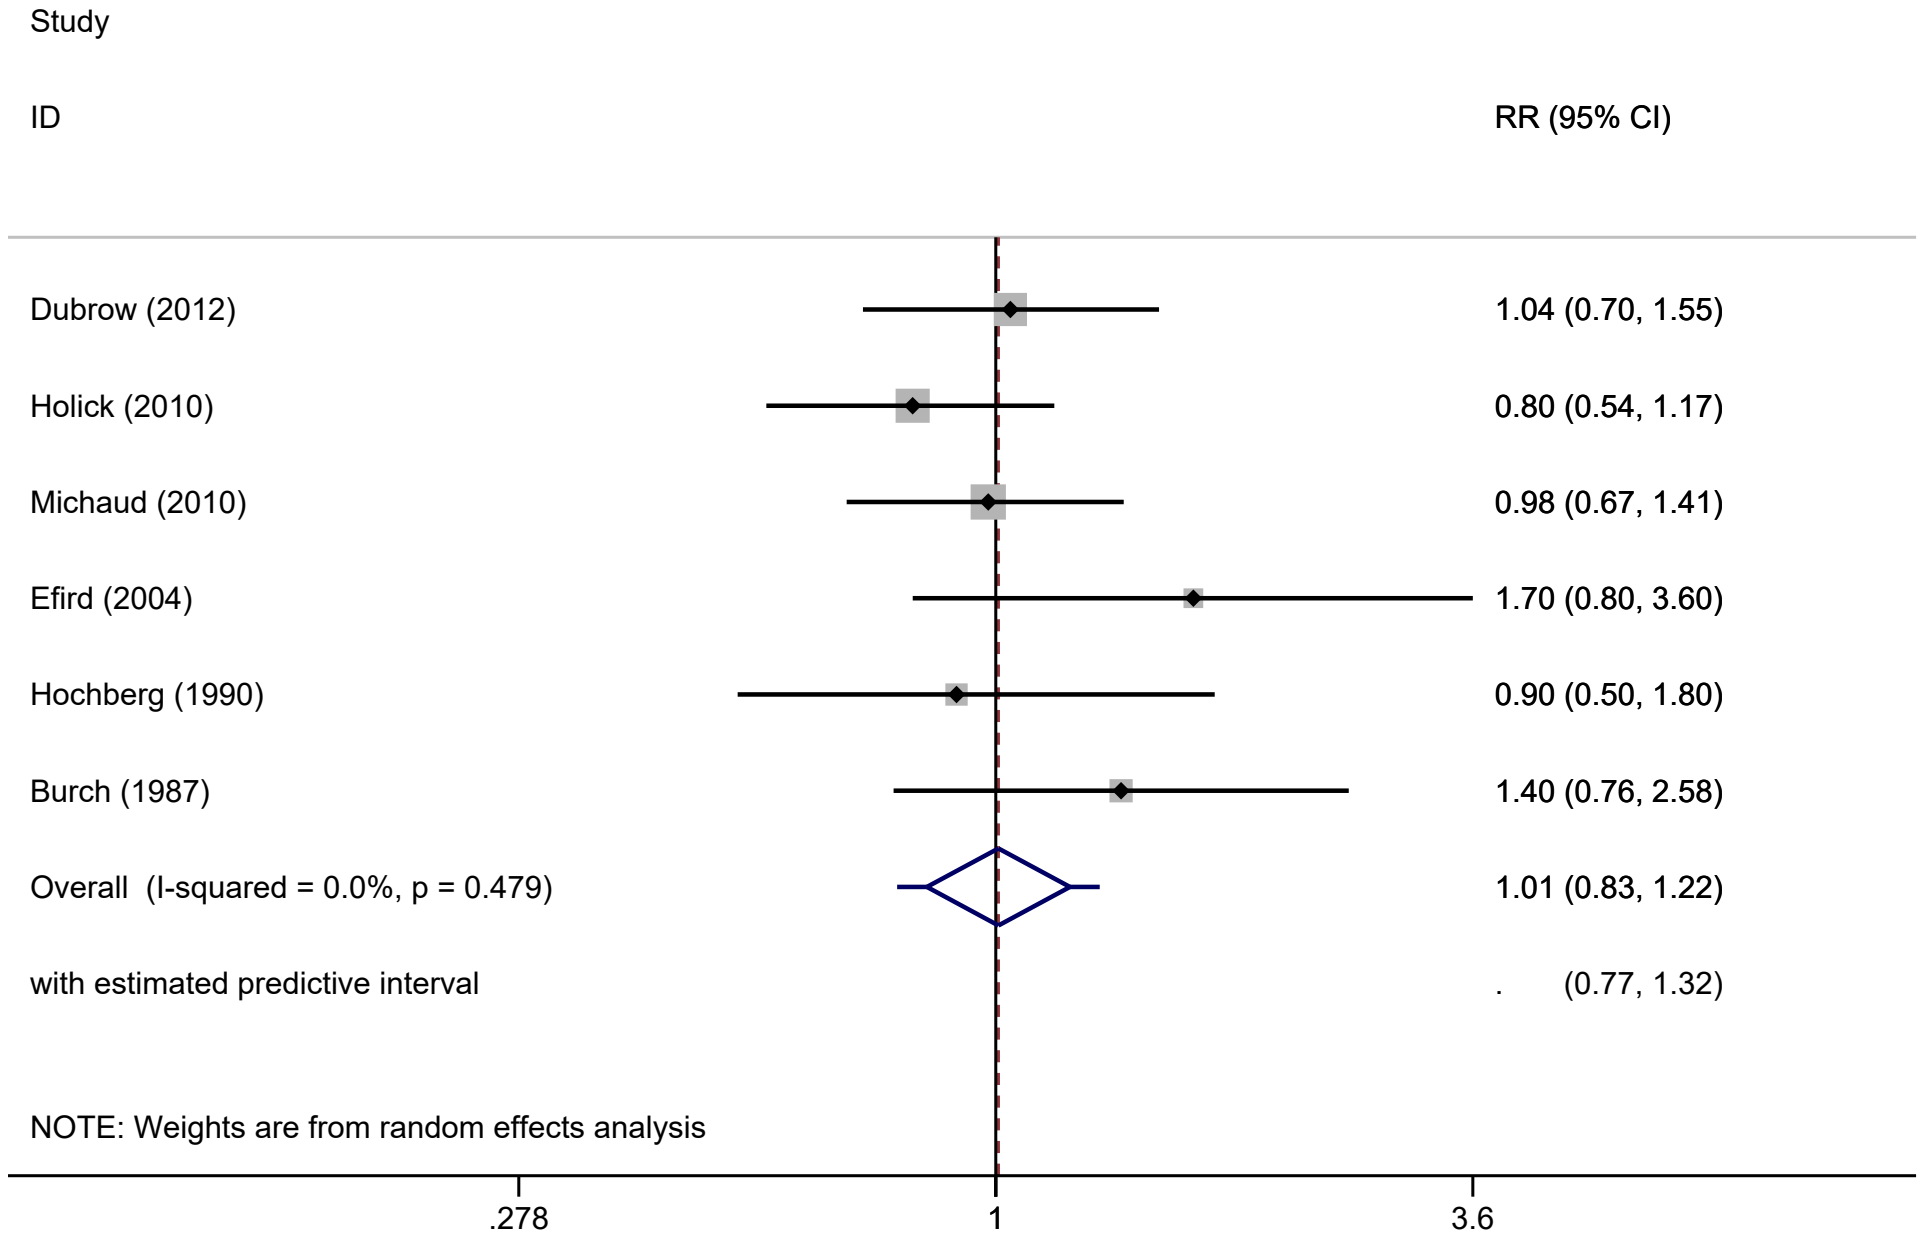



# Supplementary figure 17, Glioma, Per 1 cup

Study

ID

RR (95% CI)

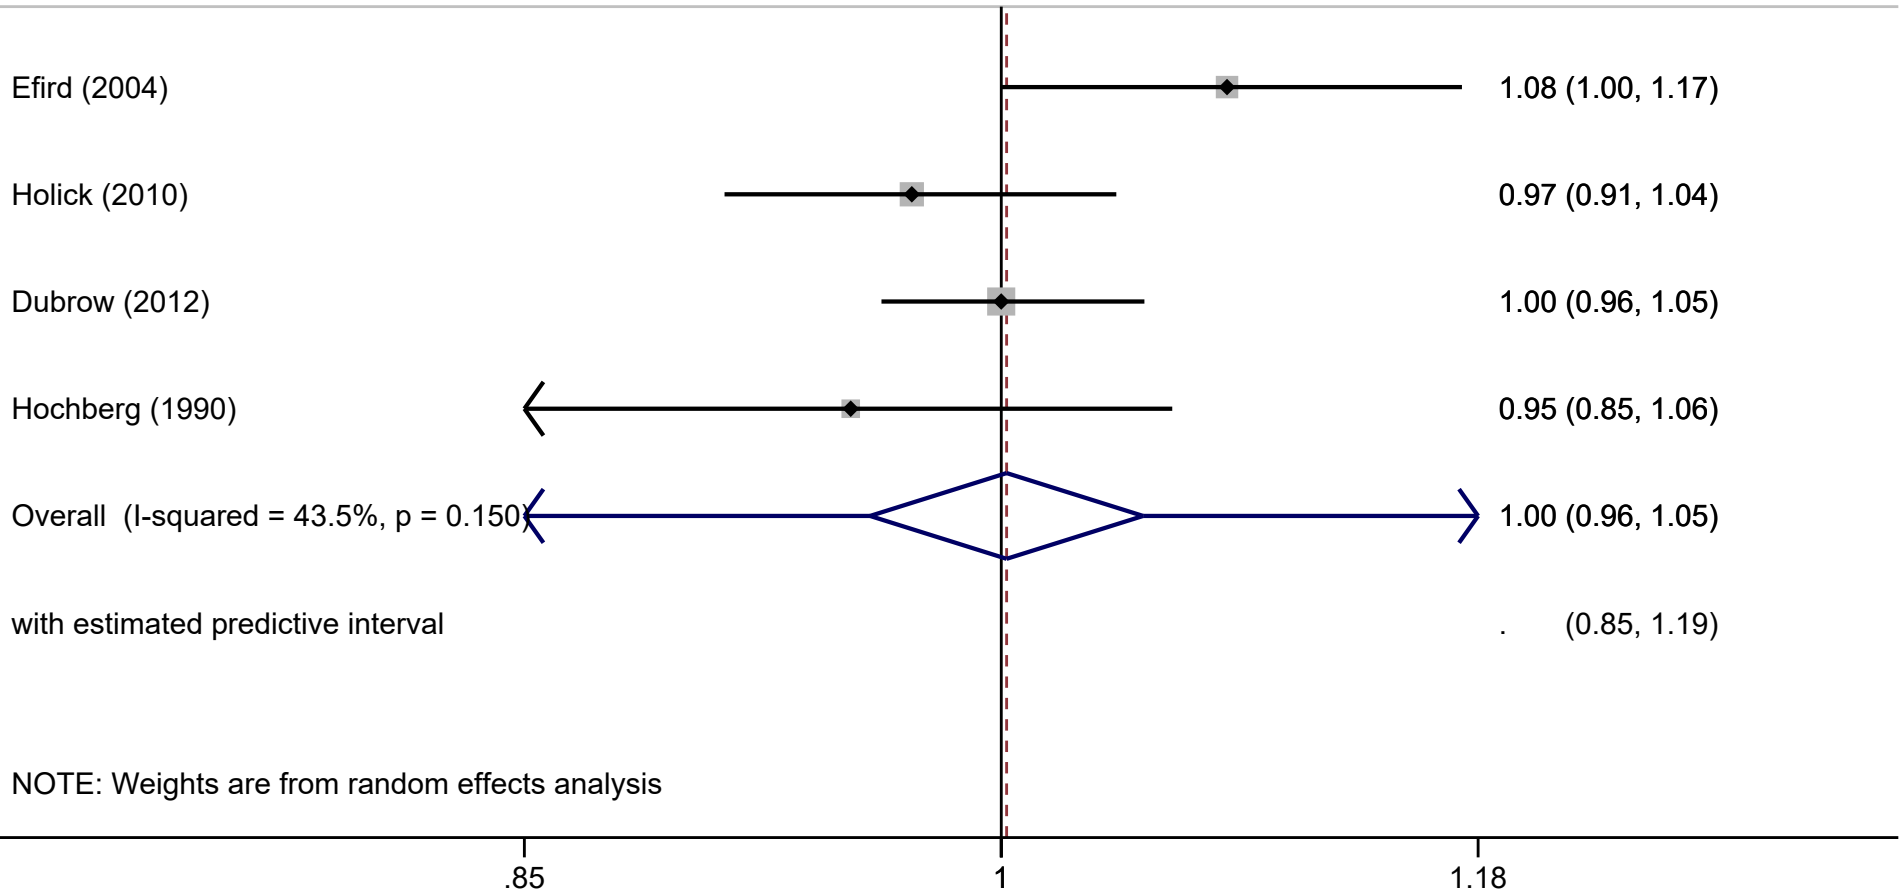

# Supplementary figure 18, Kidney cancer, H/L

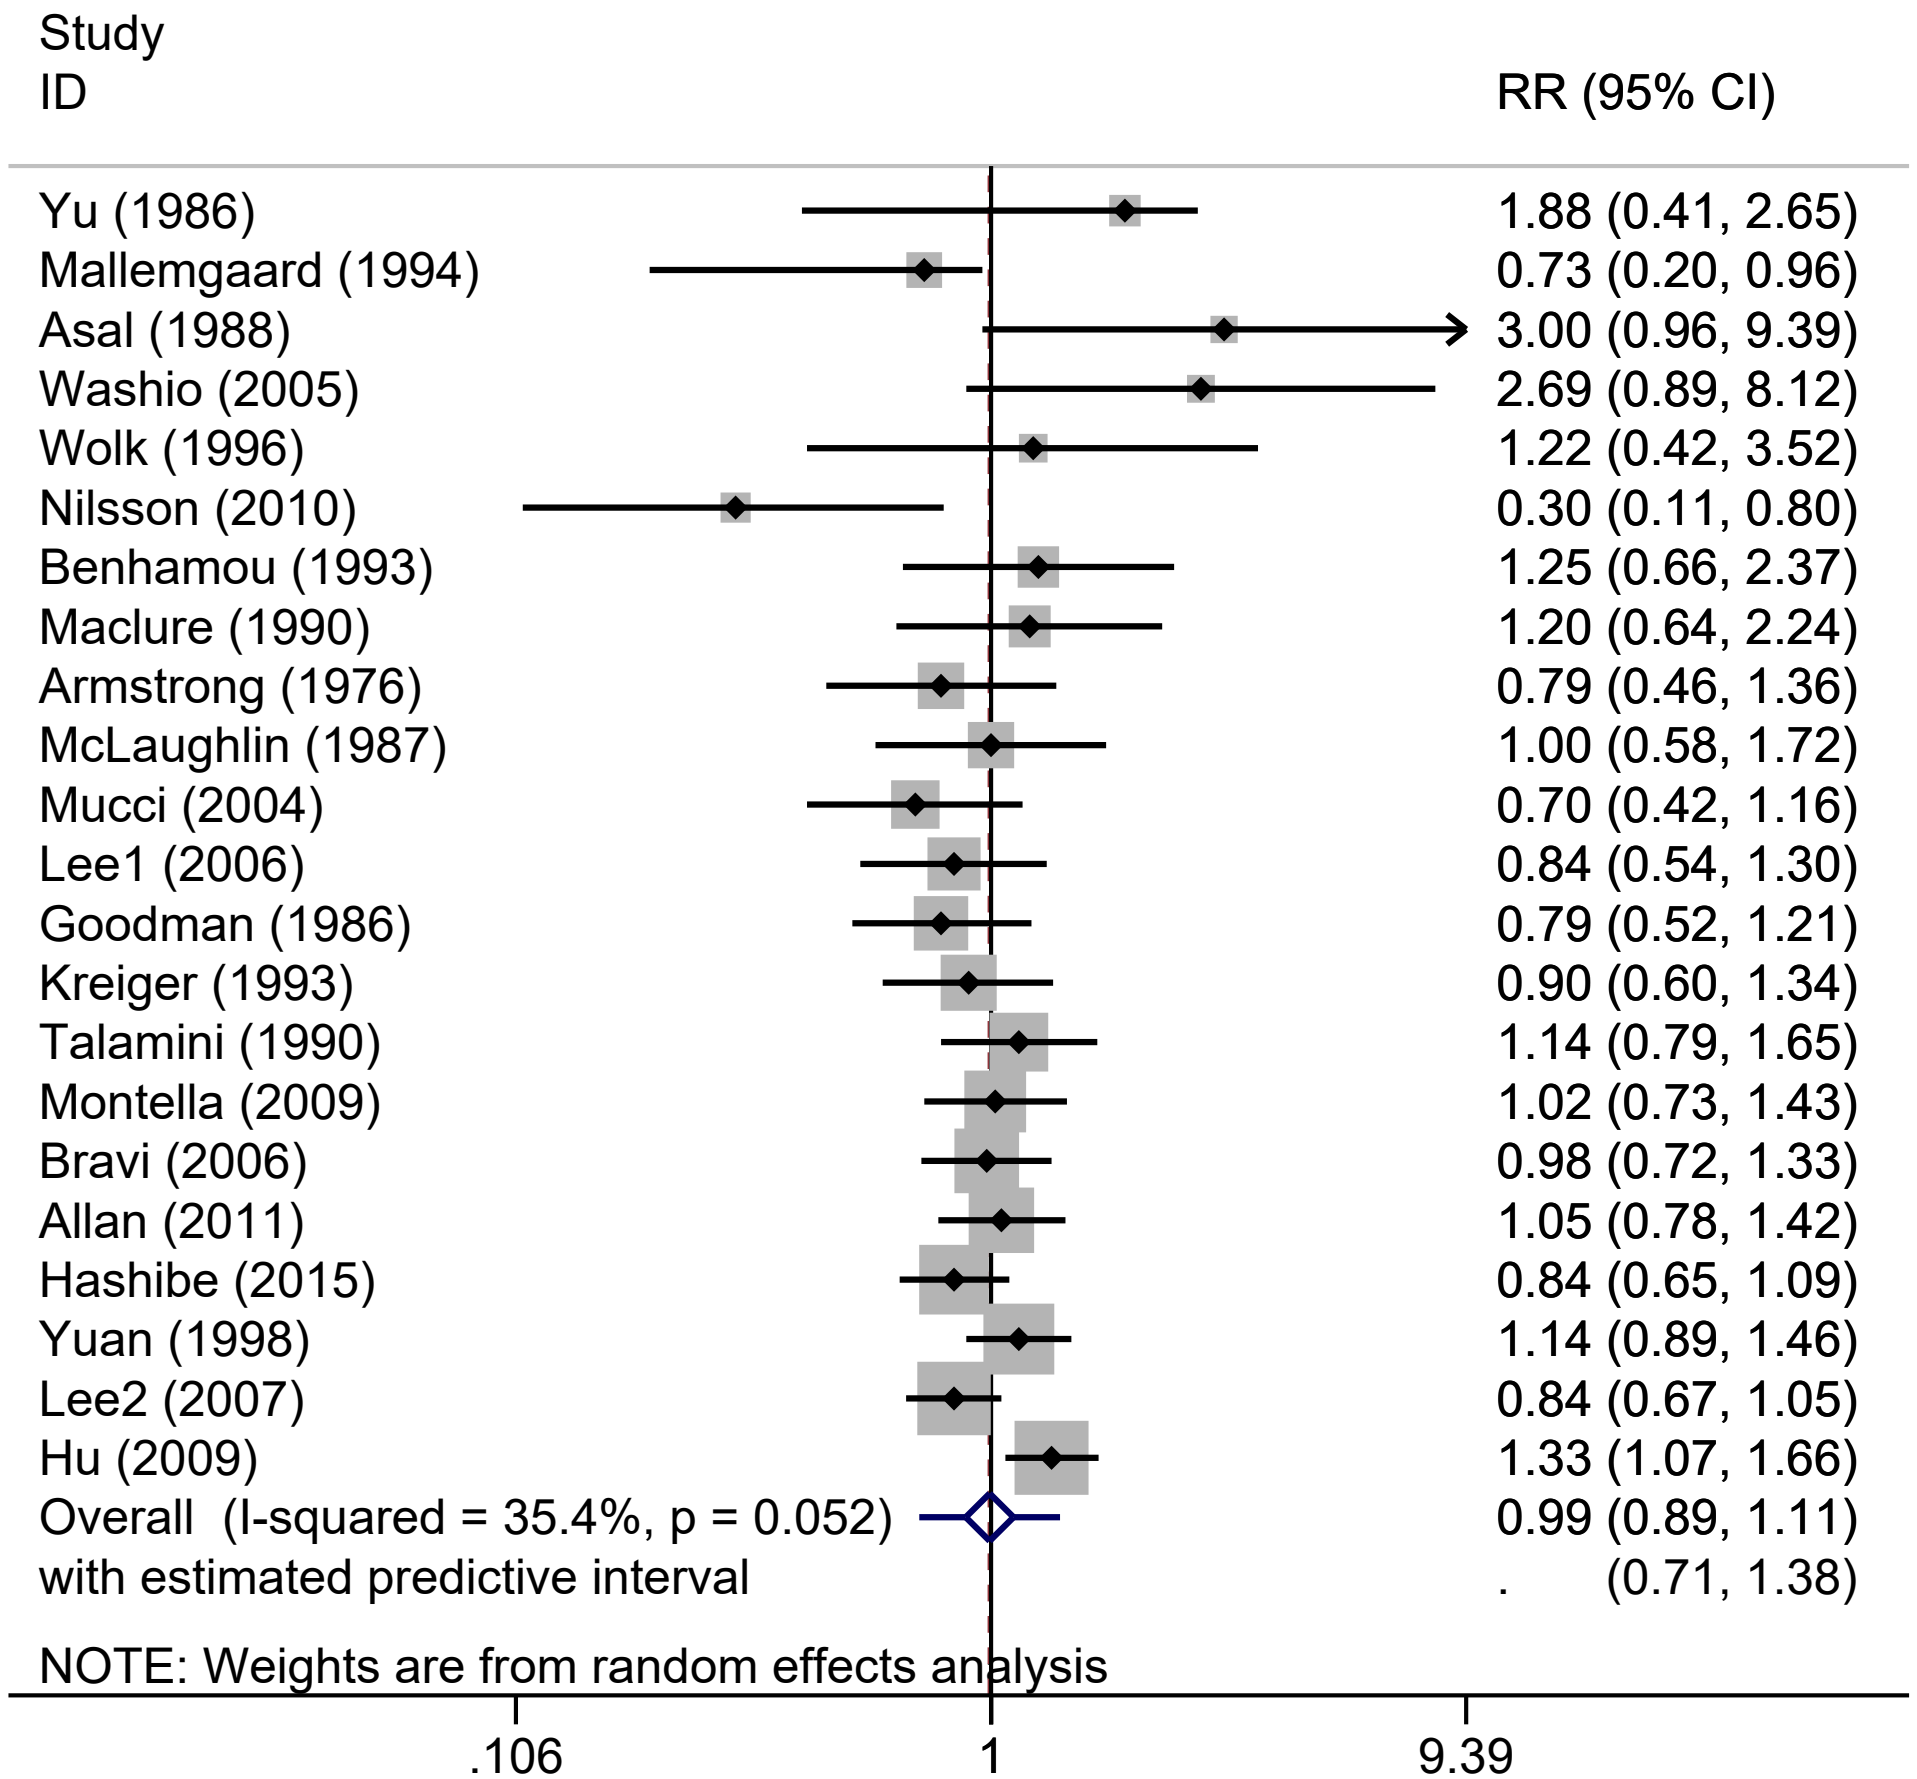

# Supplementary figure 19, Laryngeal cancer, H/L

Study

ID RR (95% CI)

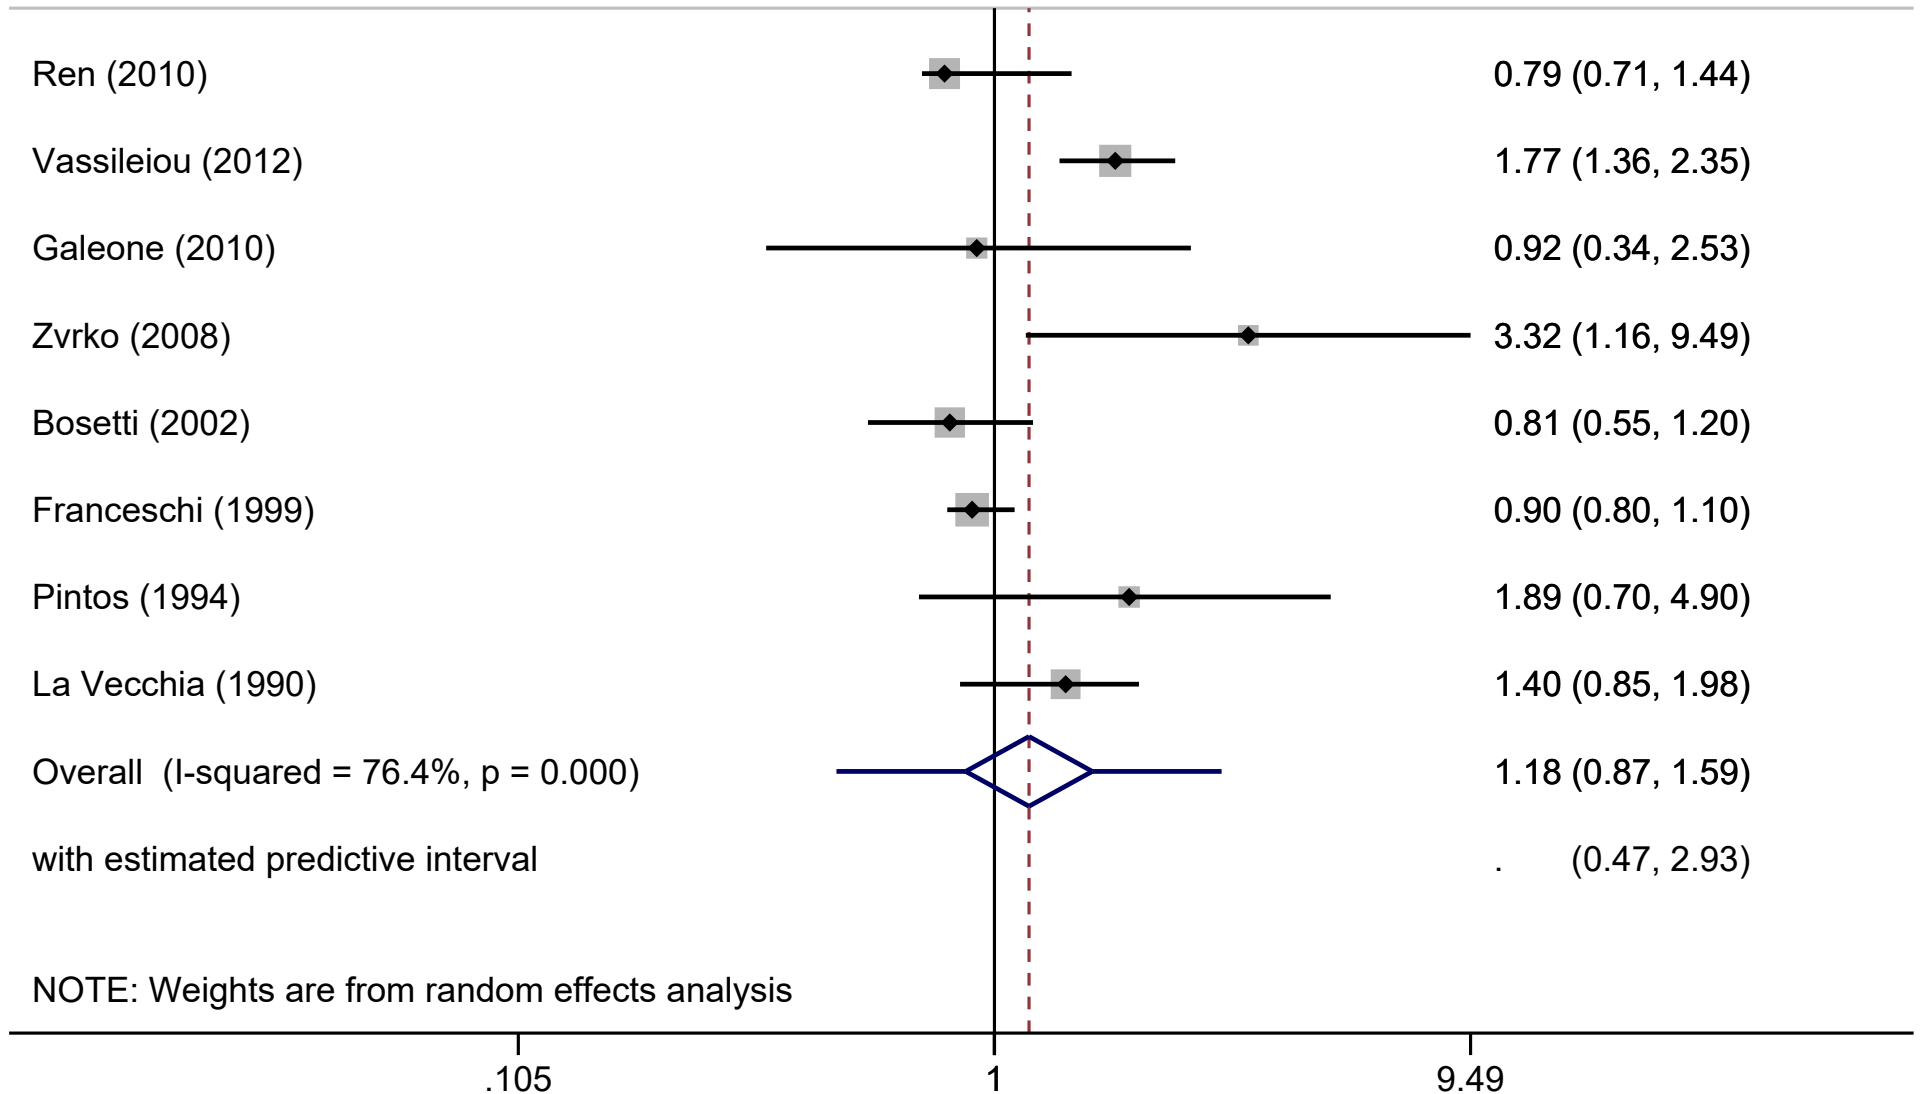

# Supplementary figure 20, Liver cancer, H/L

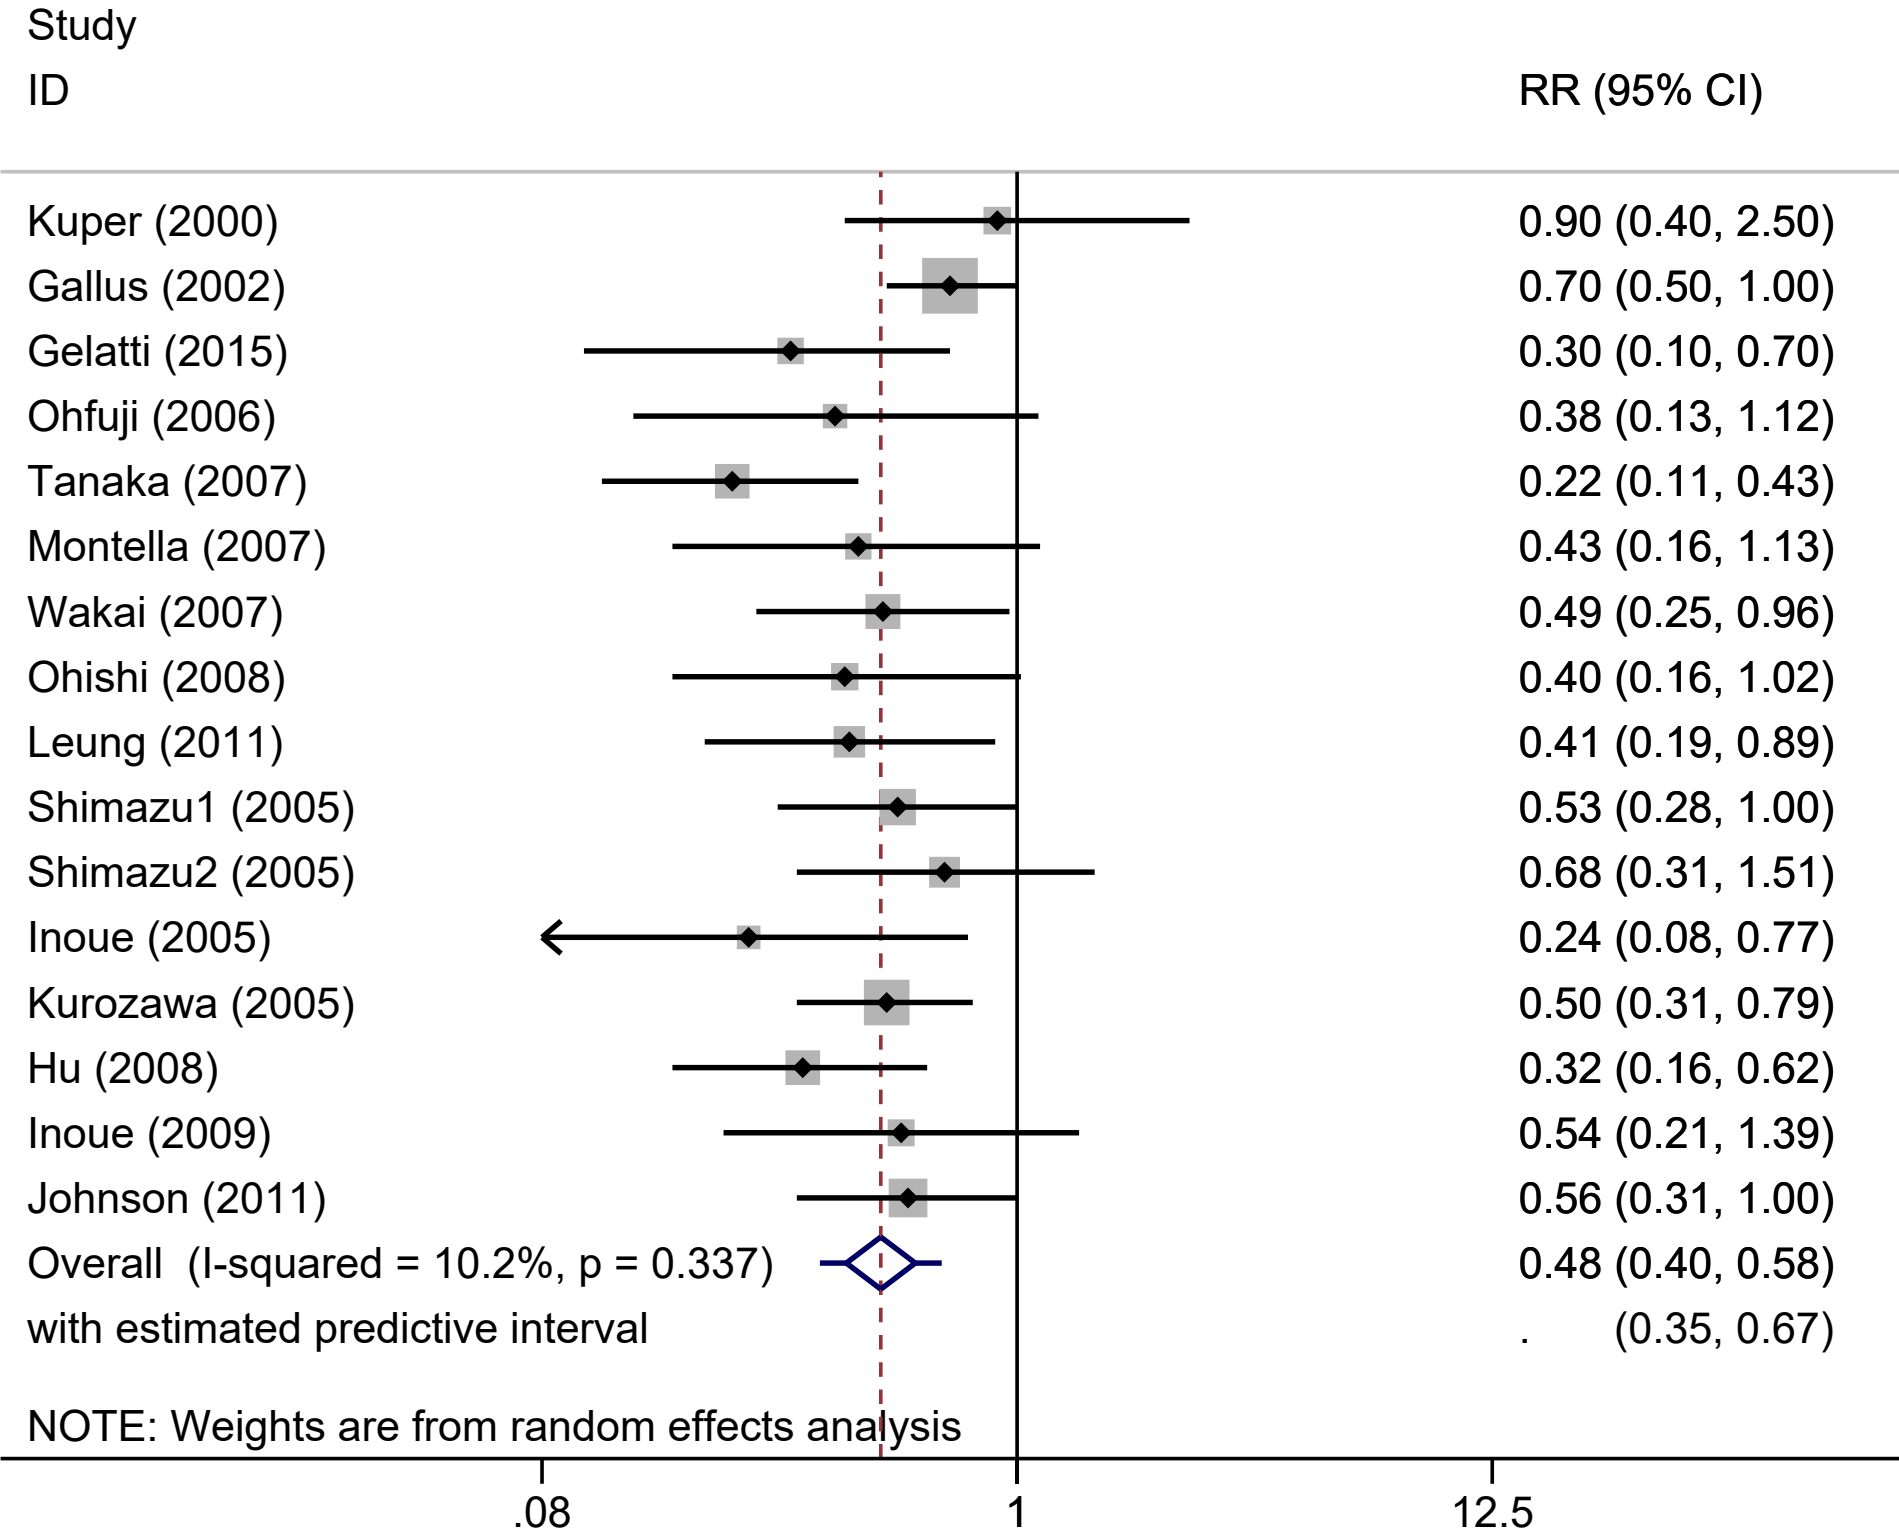

# Supplementary figure 21, Liver cancer, Per 1 cup

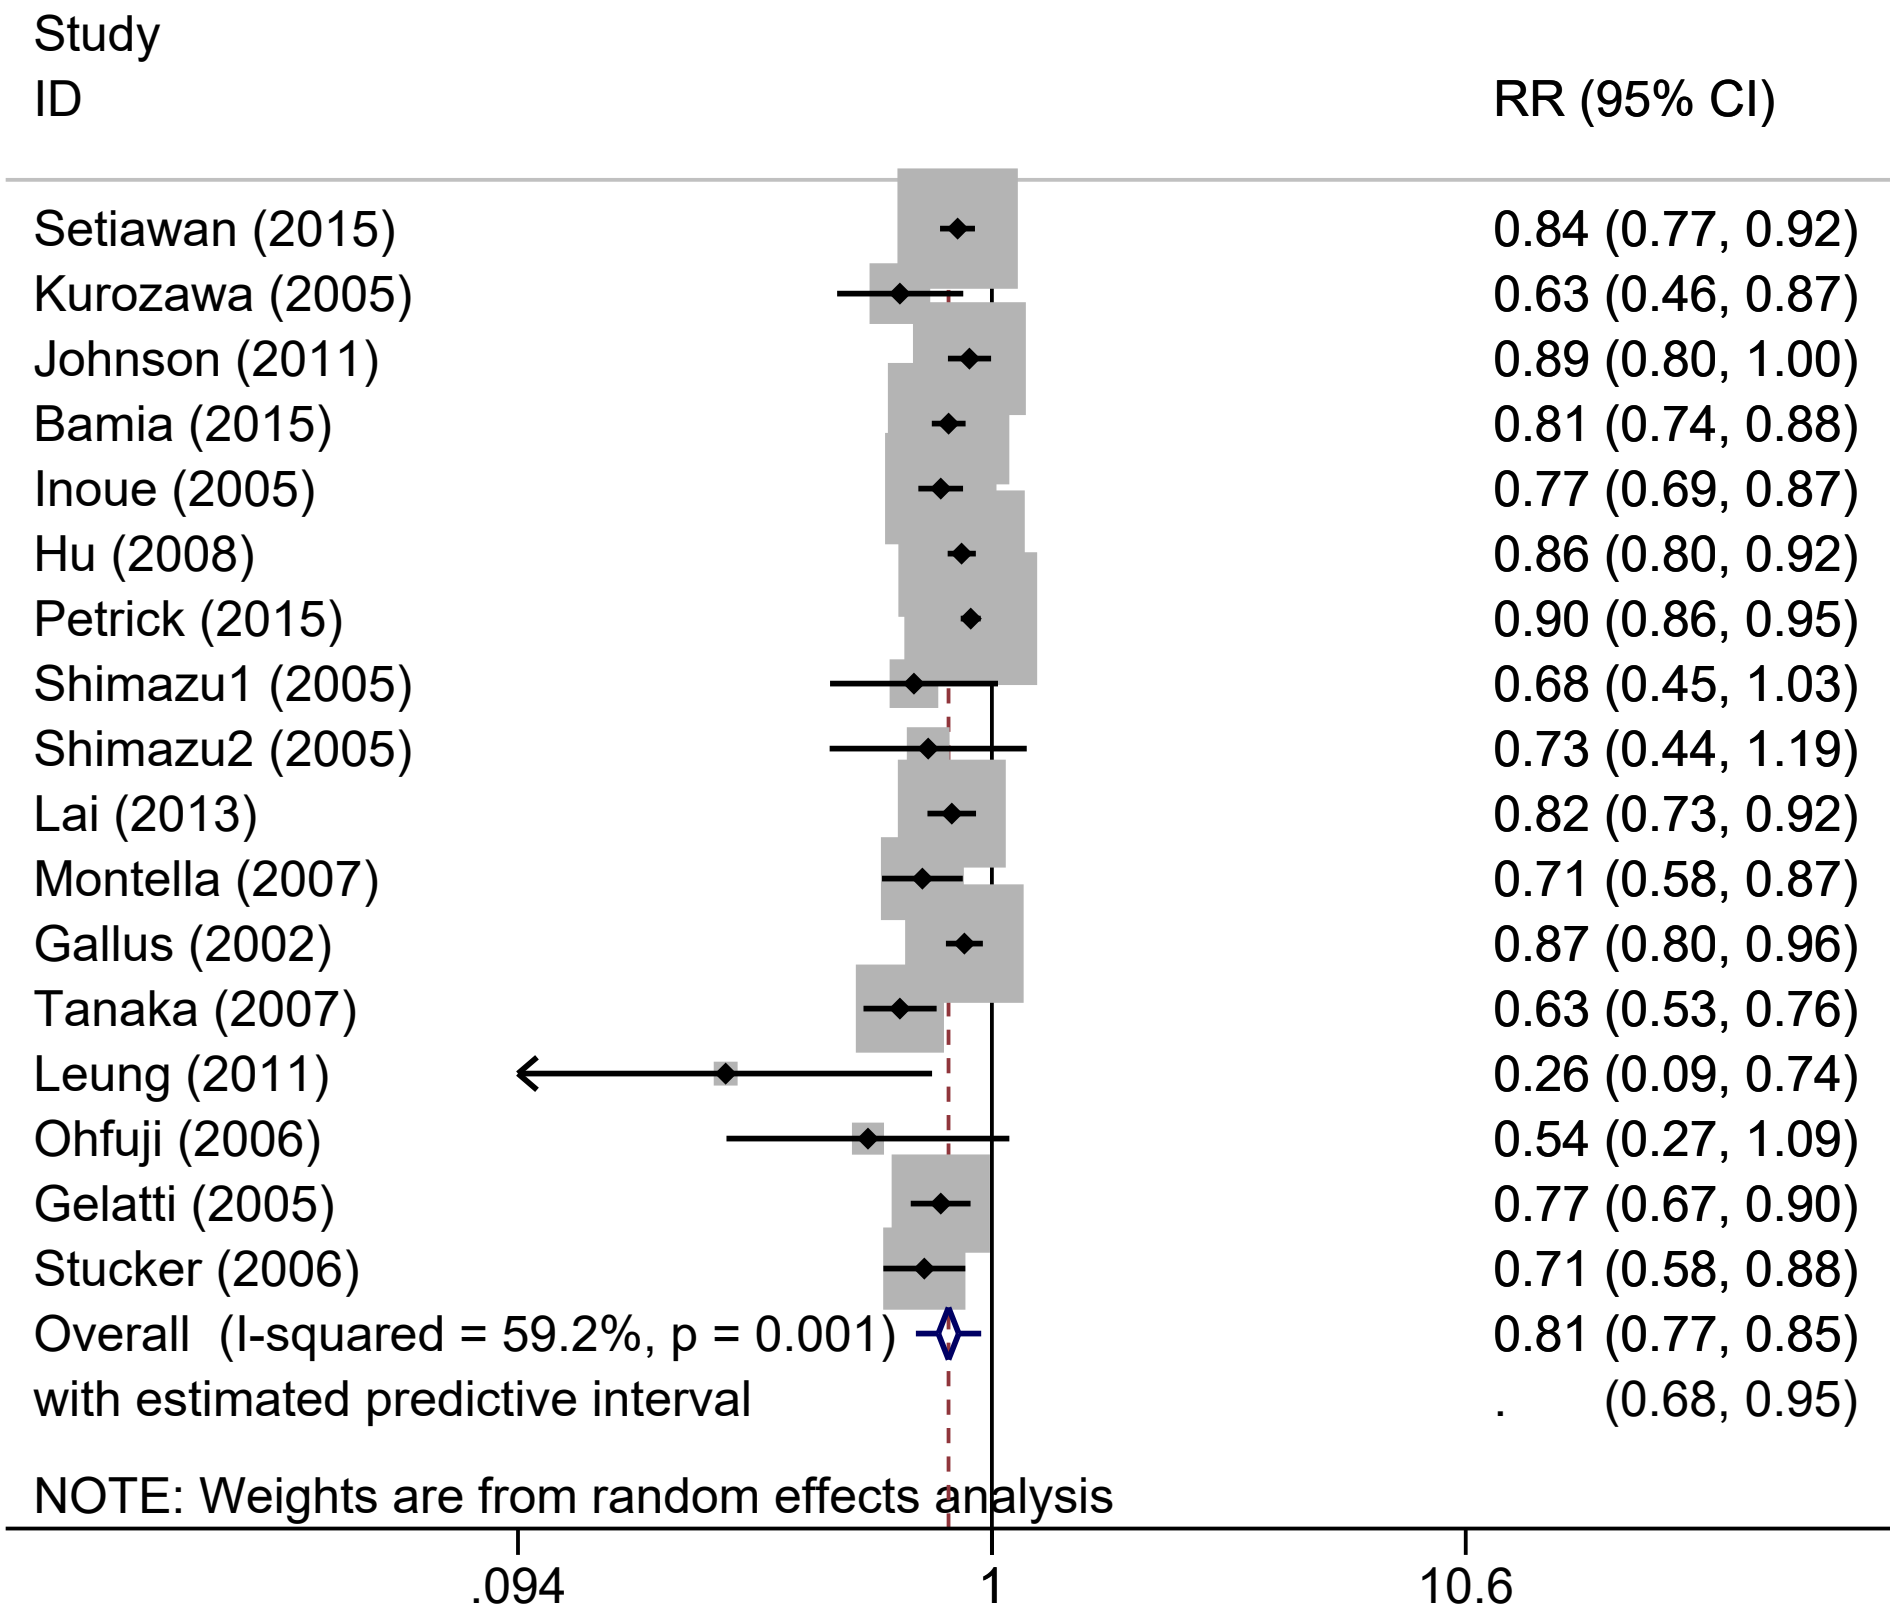

# Supplementary figure 22, Lung cancer, H/L

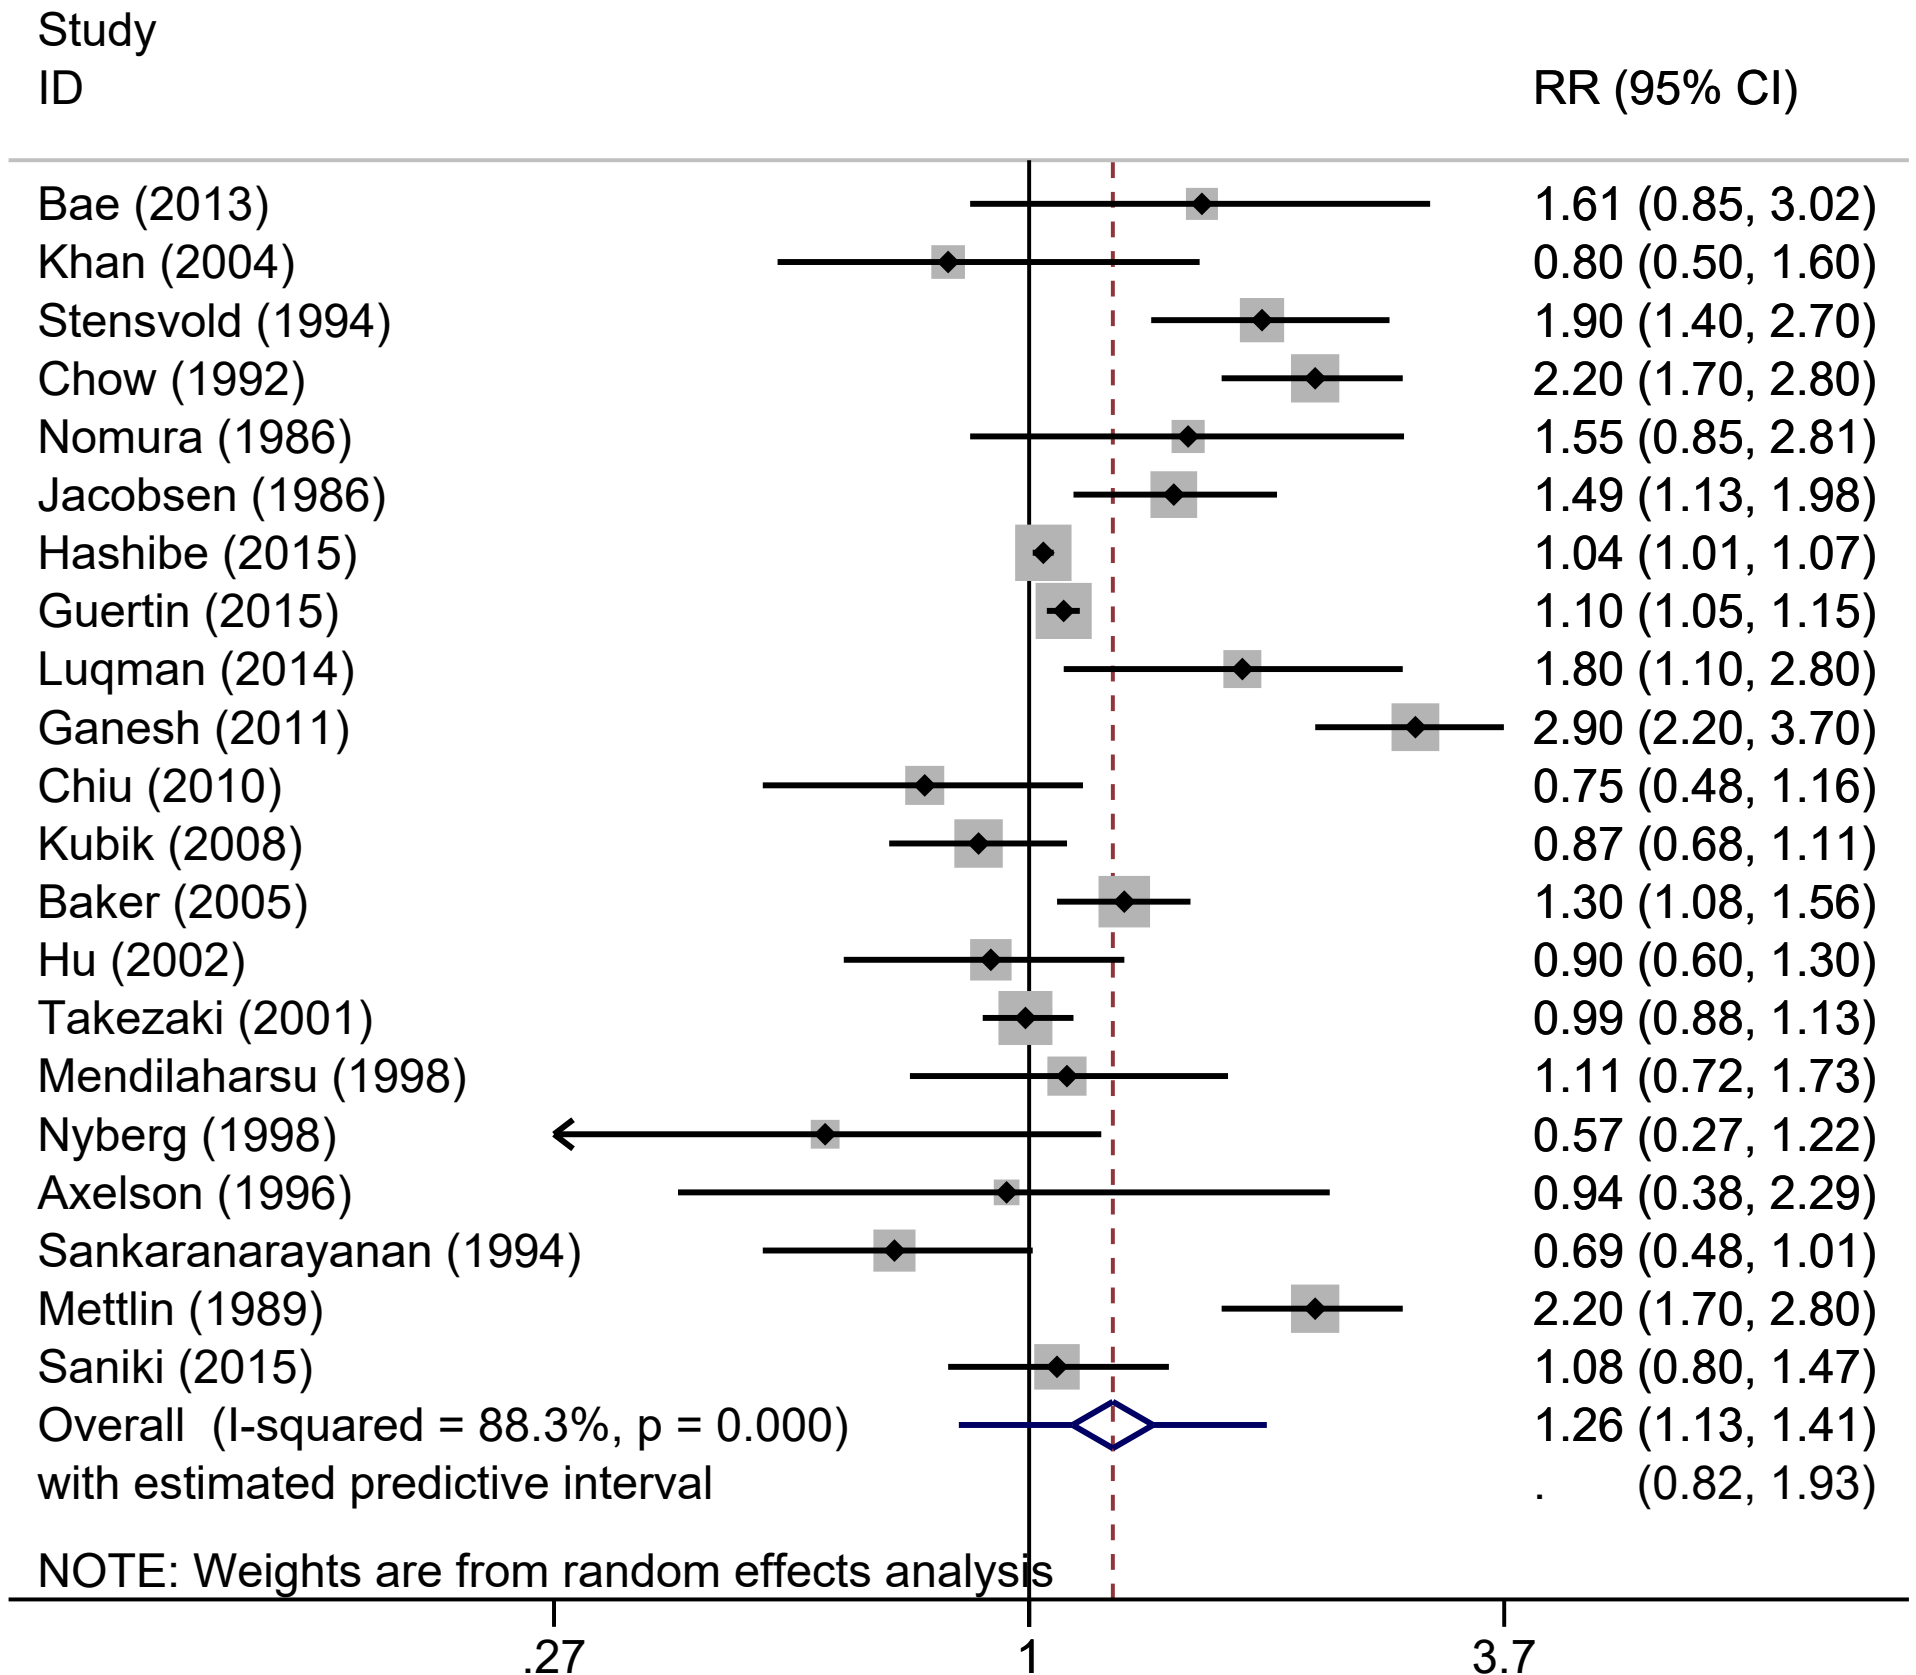

# Supplementary figure 23, Lung cancer, Per 1 cup

Study

ID RR (95% CI)

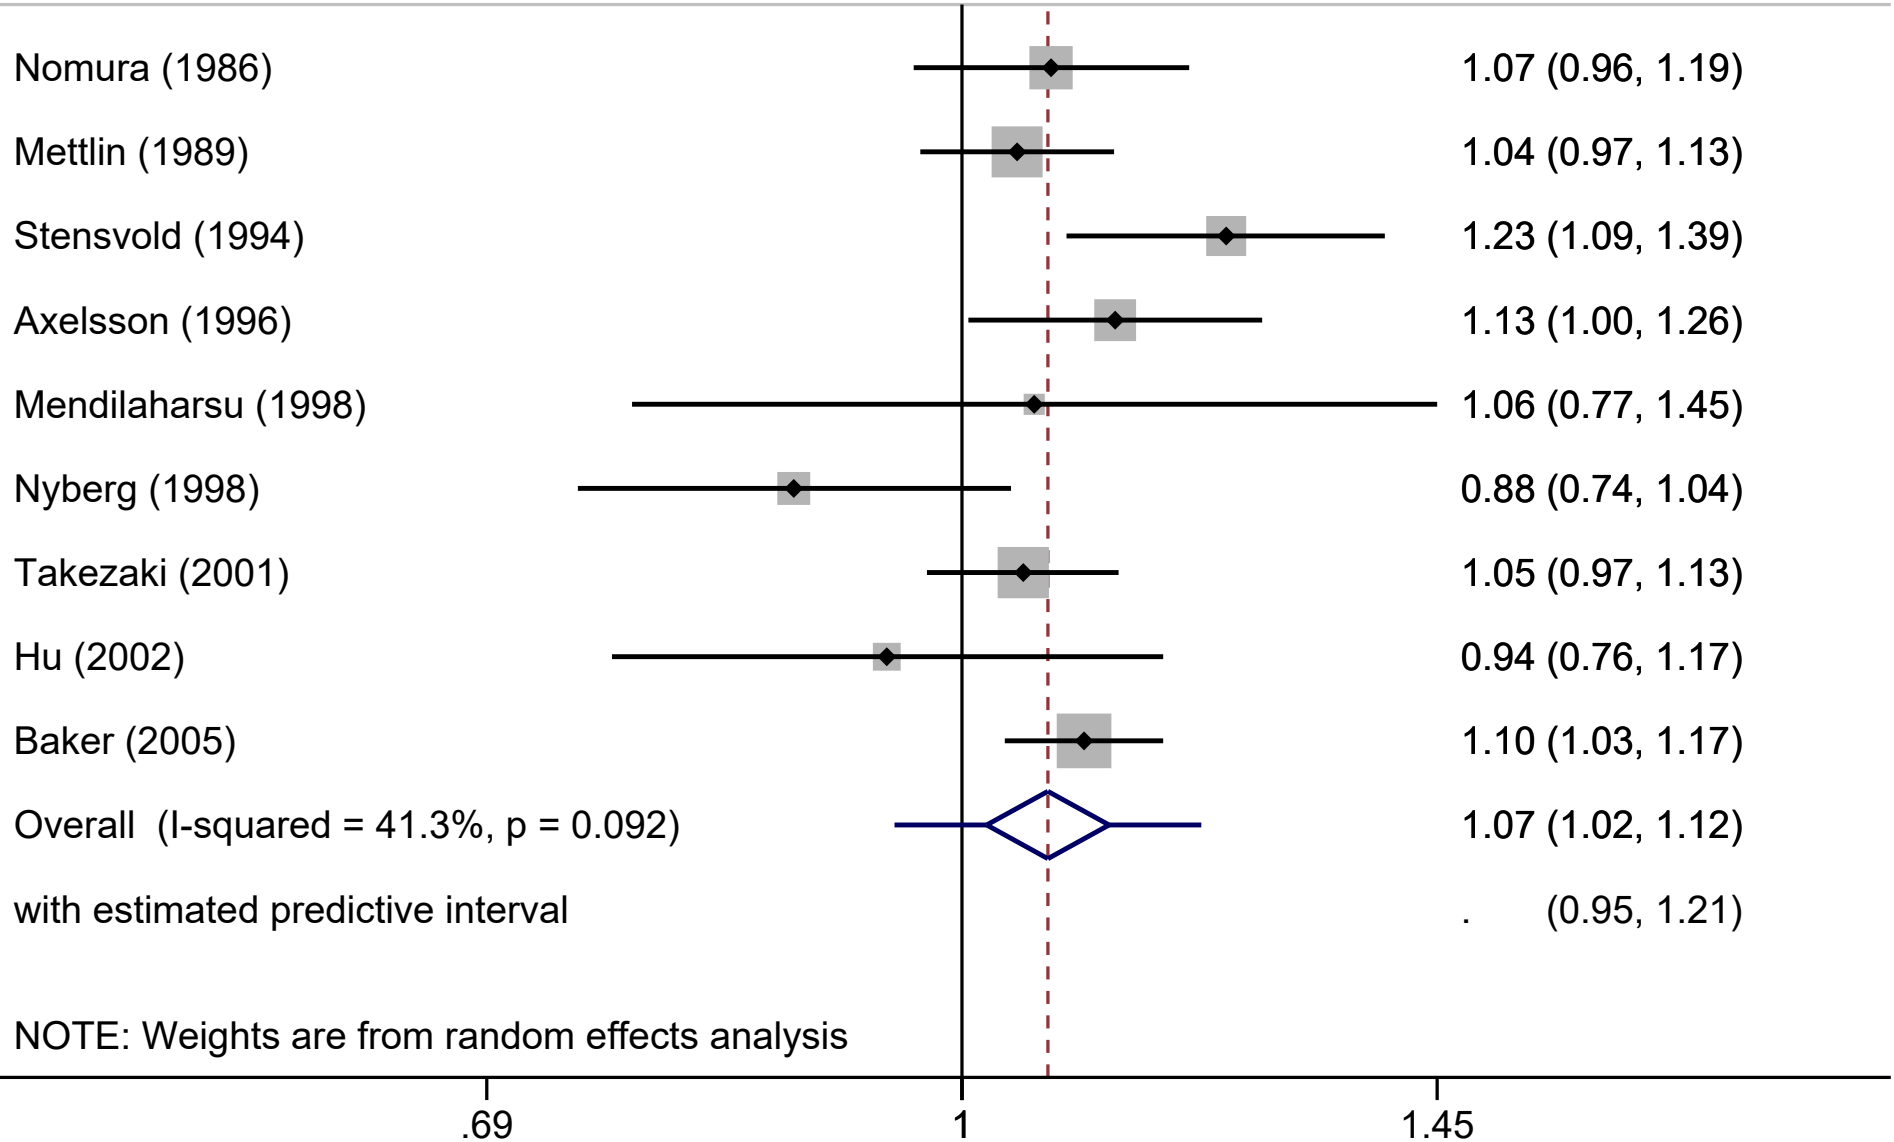

# Supplementary figure 24, Lymphoma, H/L

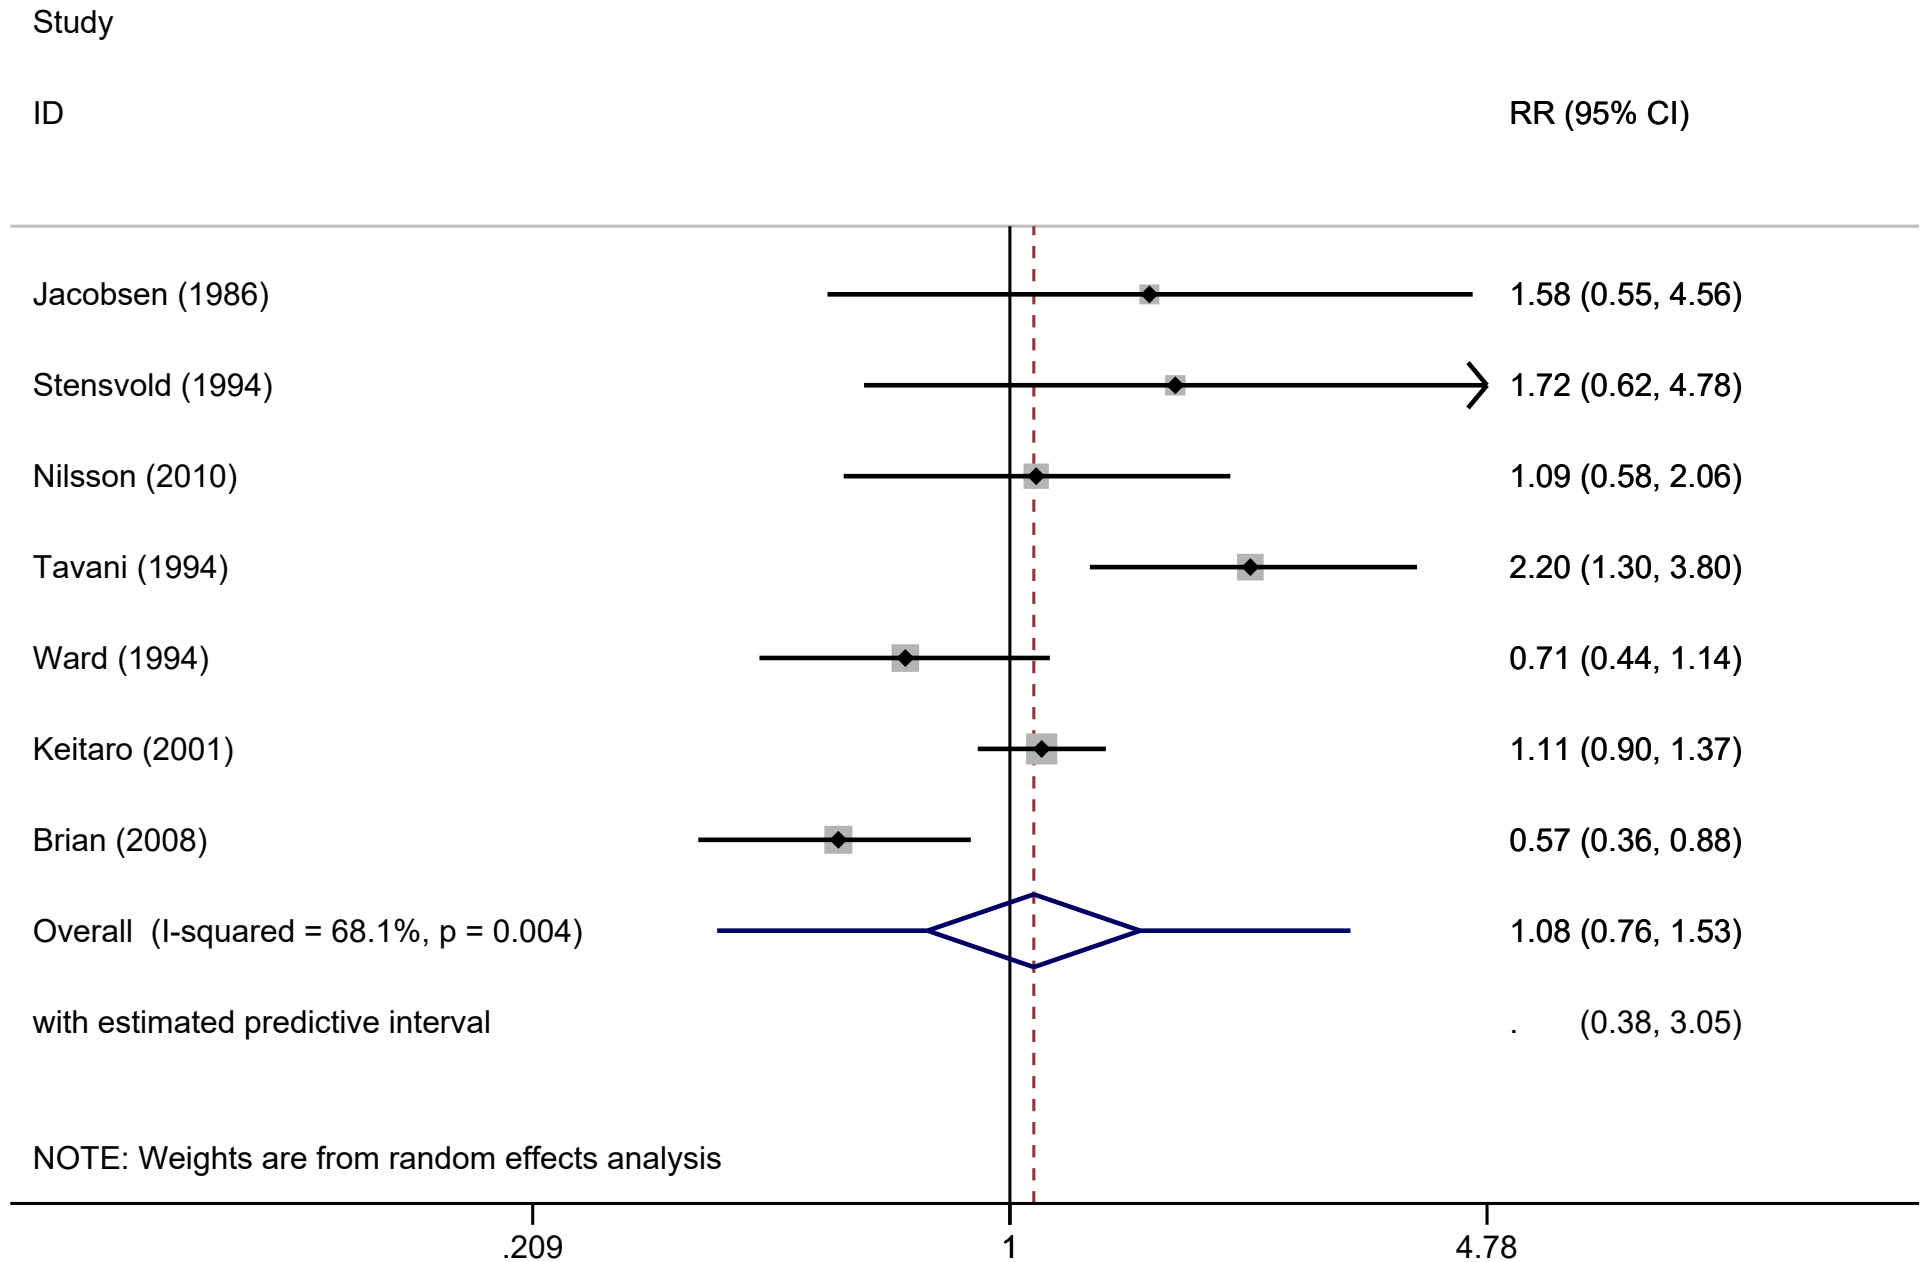



# Supplementary figure 25, Melanoma, H/L

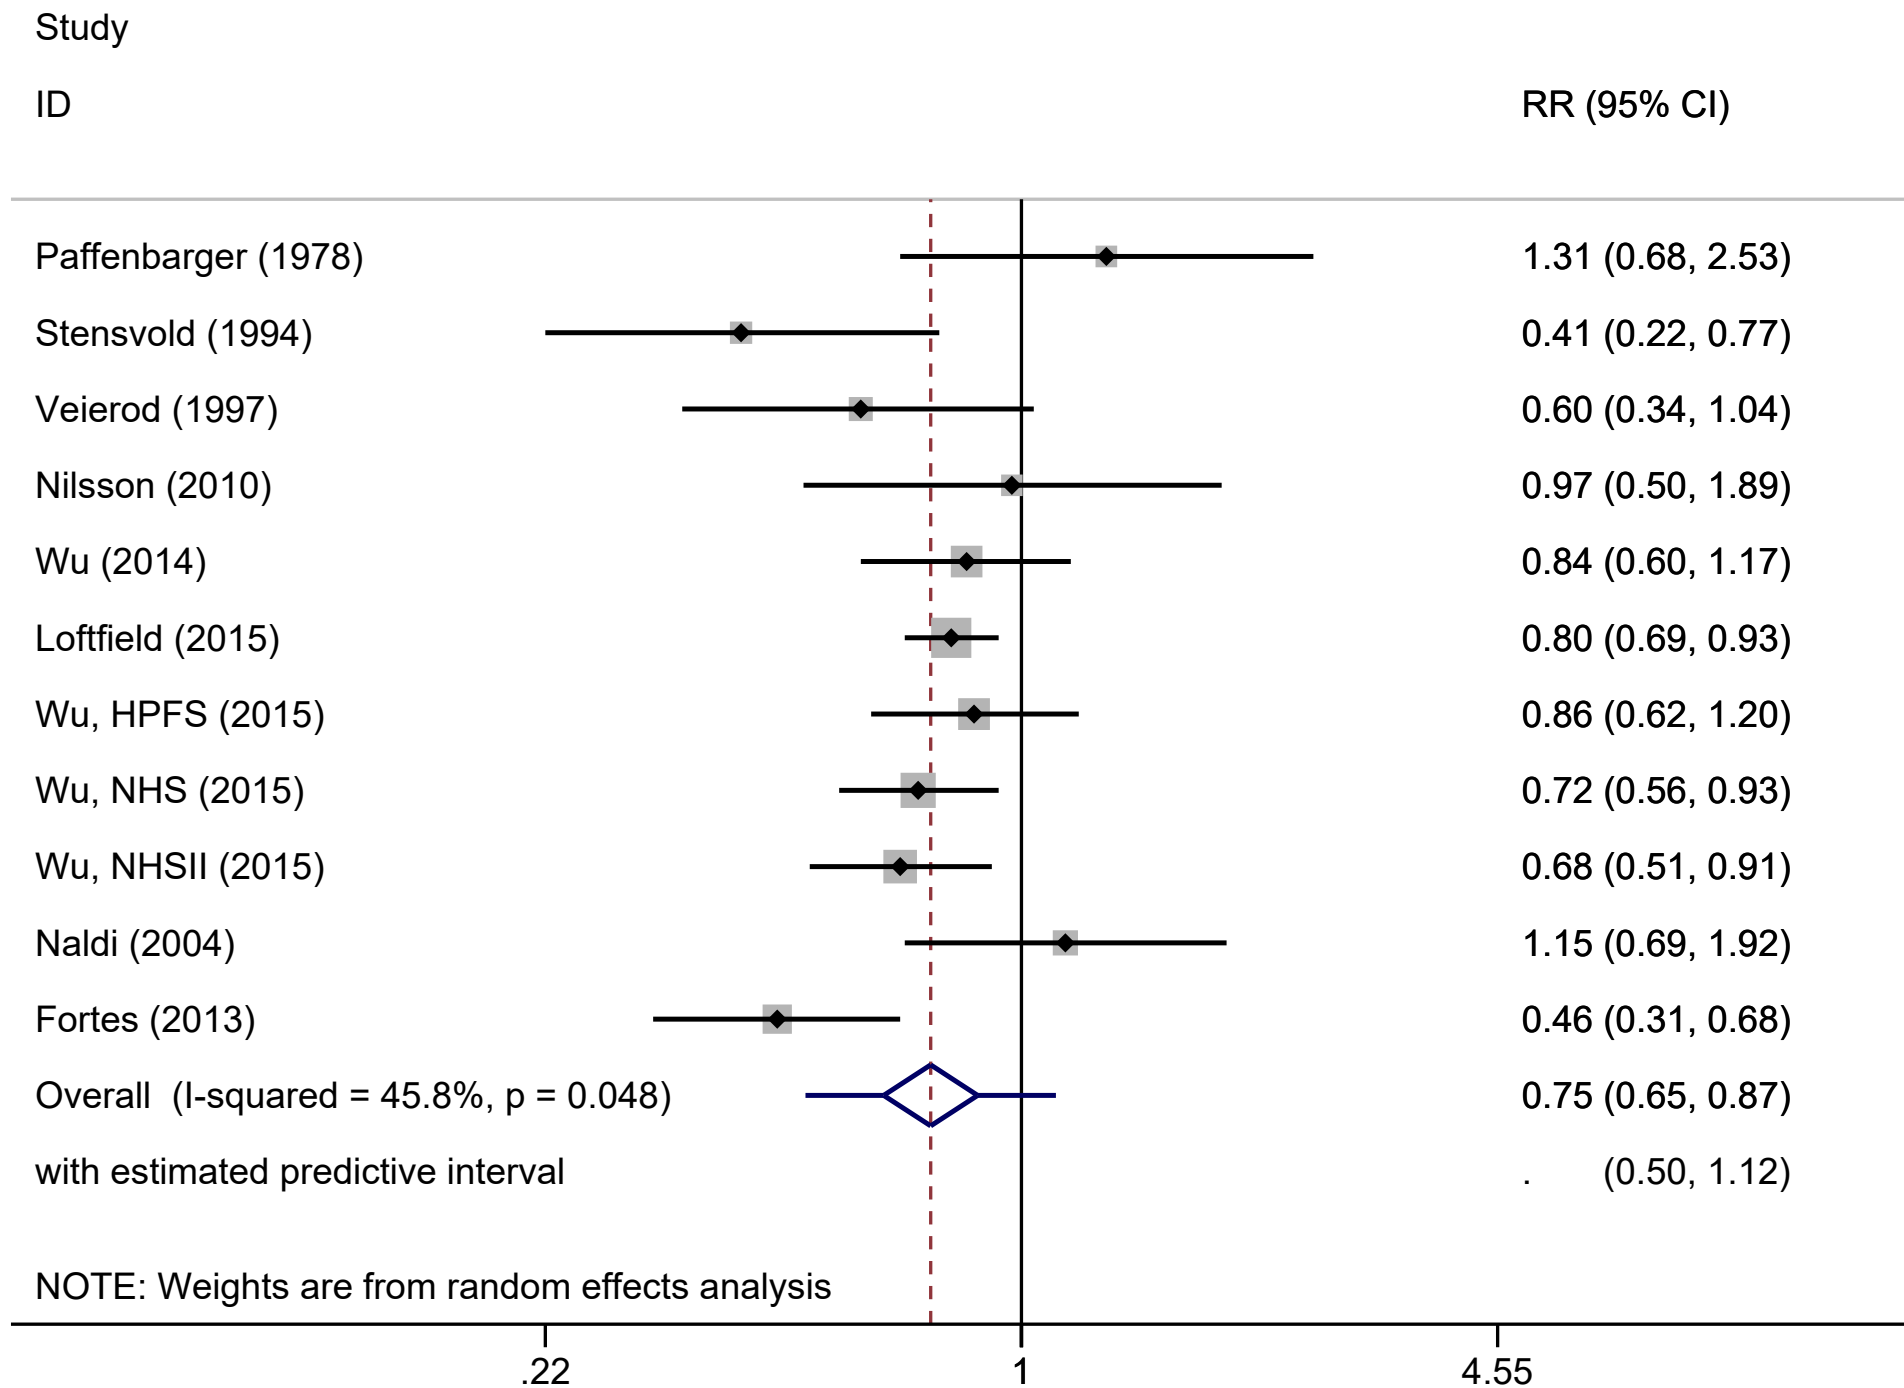

# Supplementary figure 26, Nonmelanoma, H/L

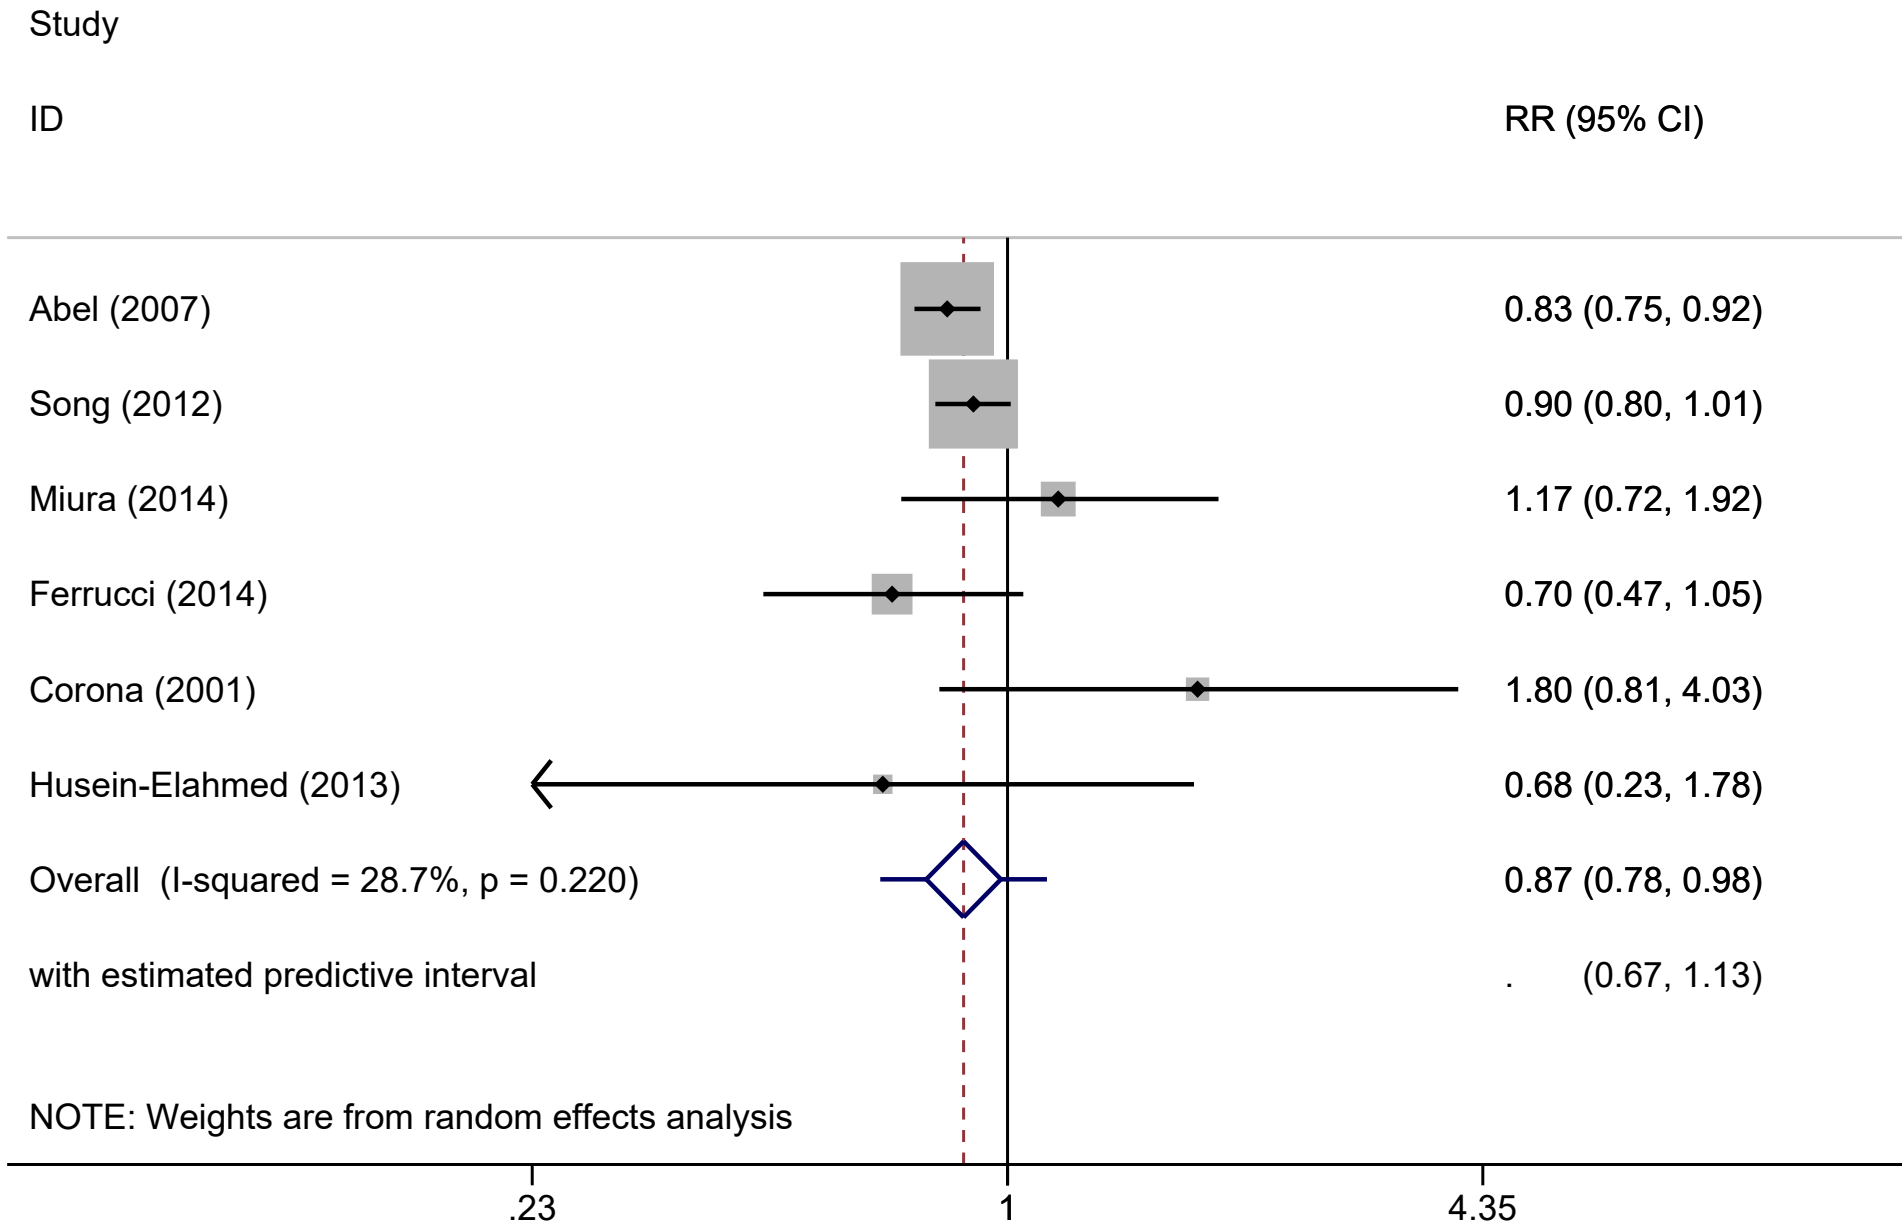

# Supplementary figure 27, Oral cancer, H/L

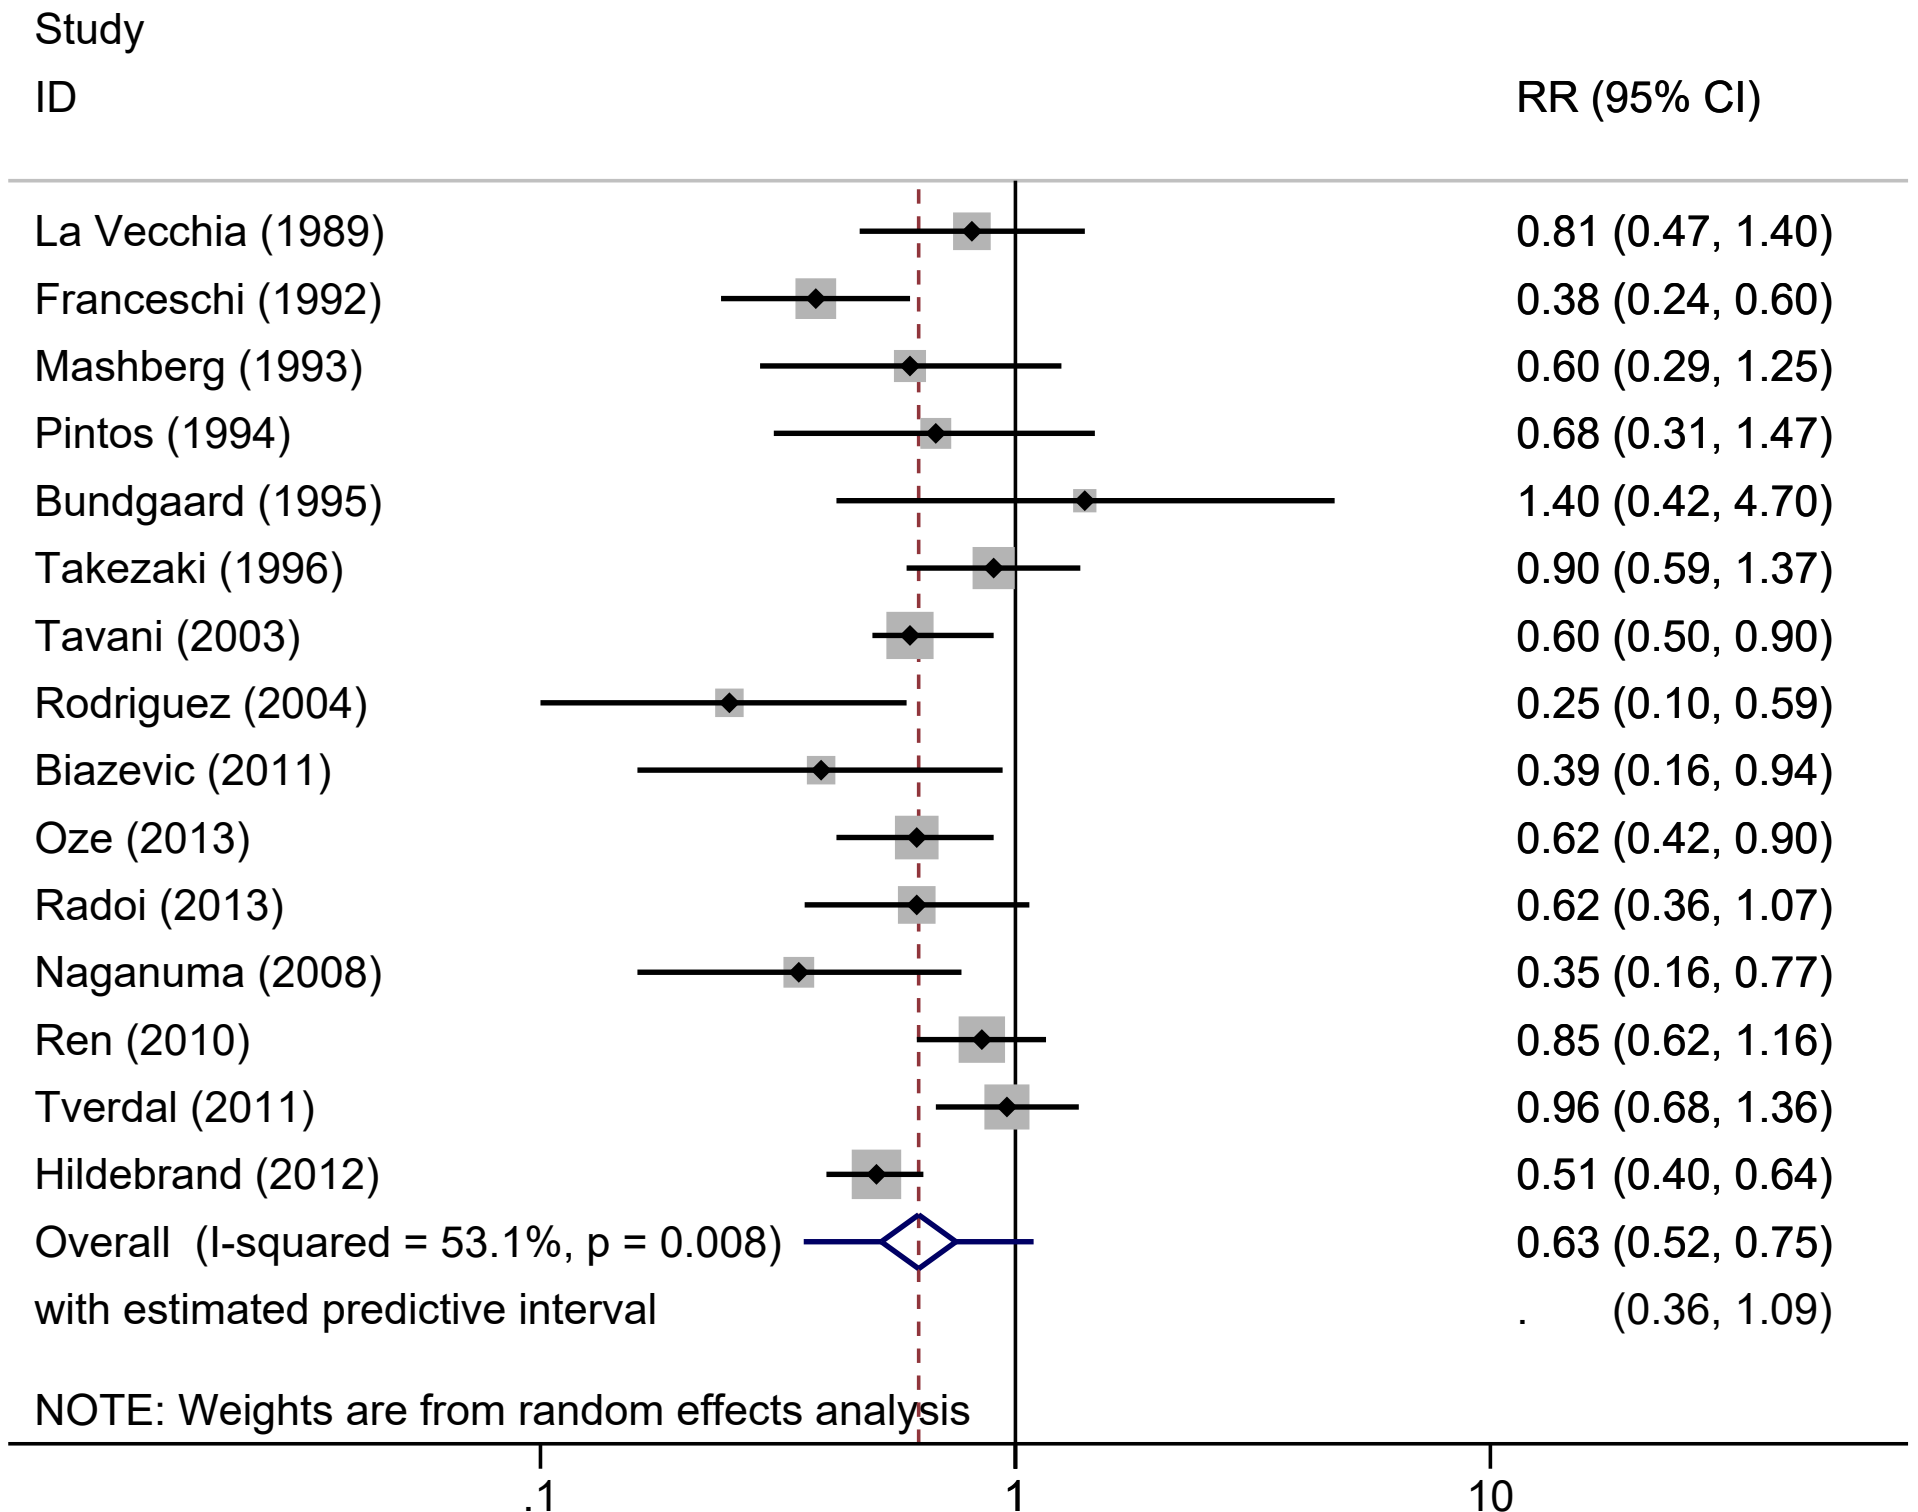

# Supplementary figure 28, Oral/Pharyngeal cancer, H/L

Study

ID

RR (95% CI)

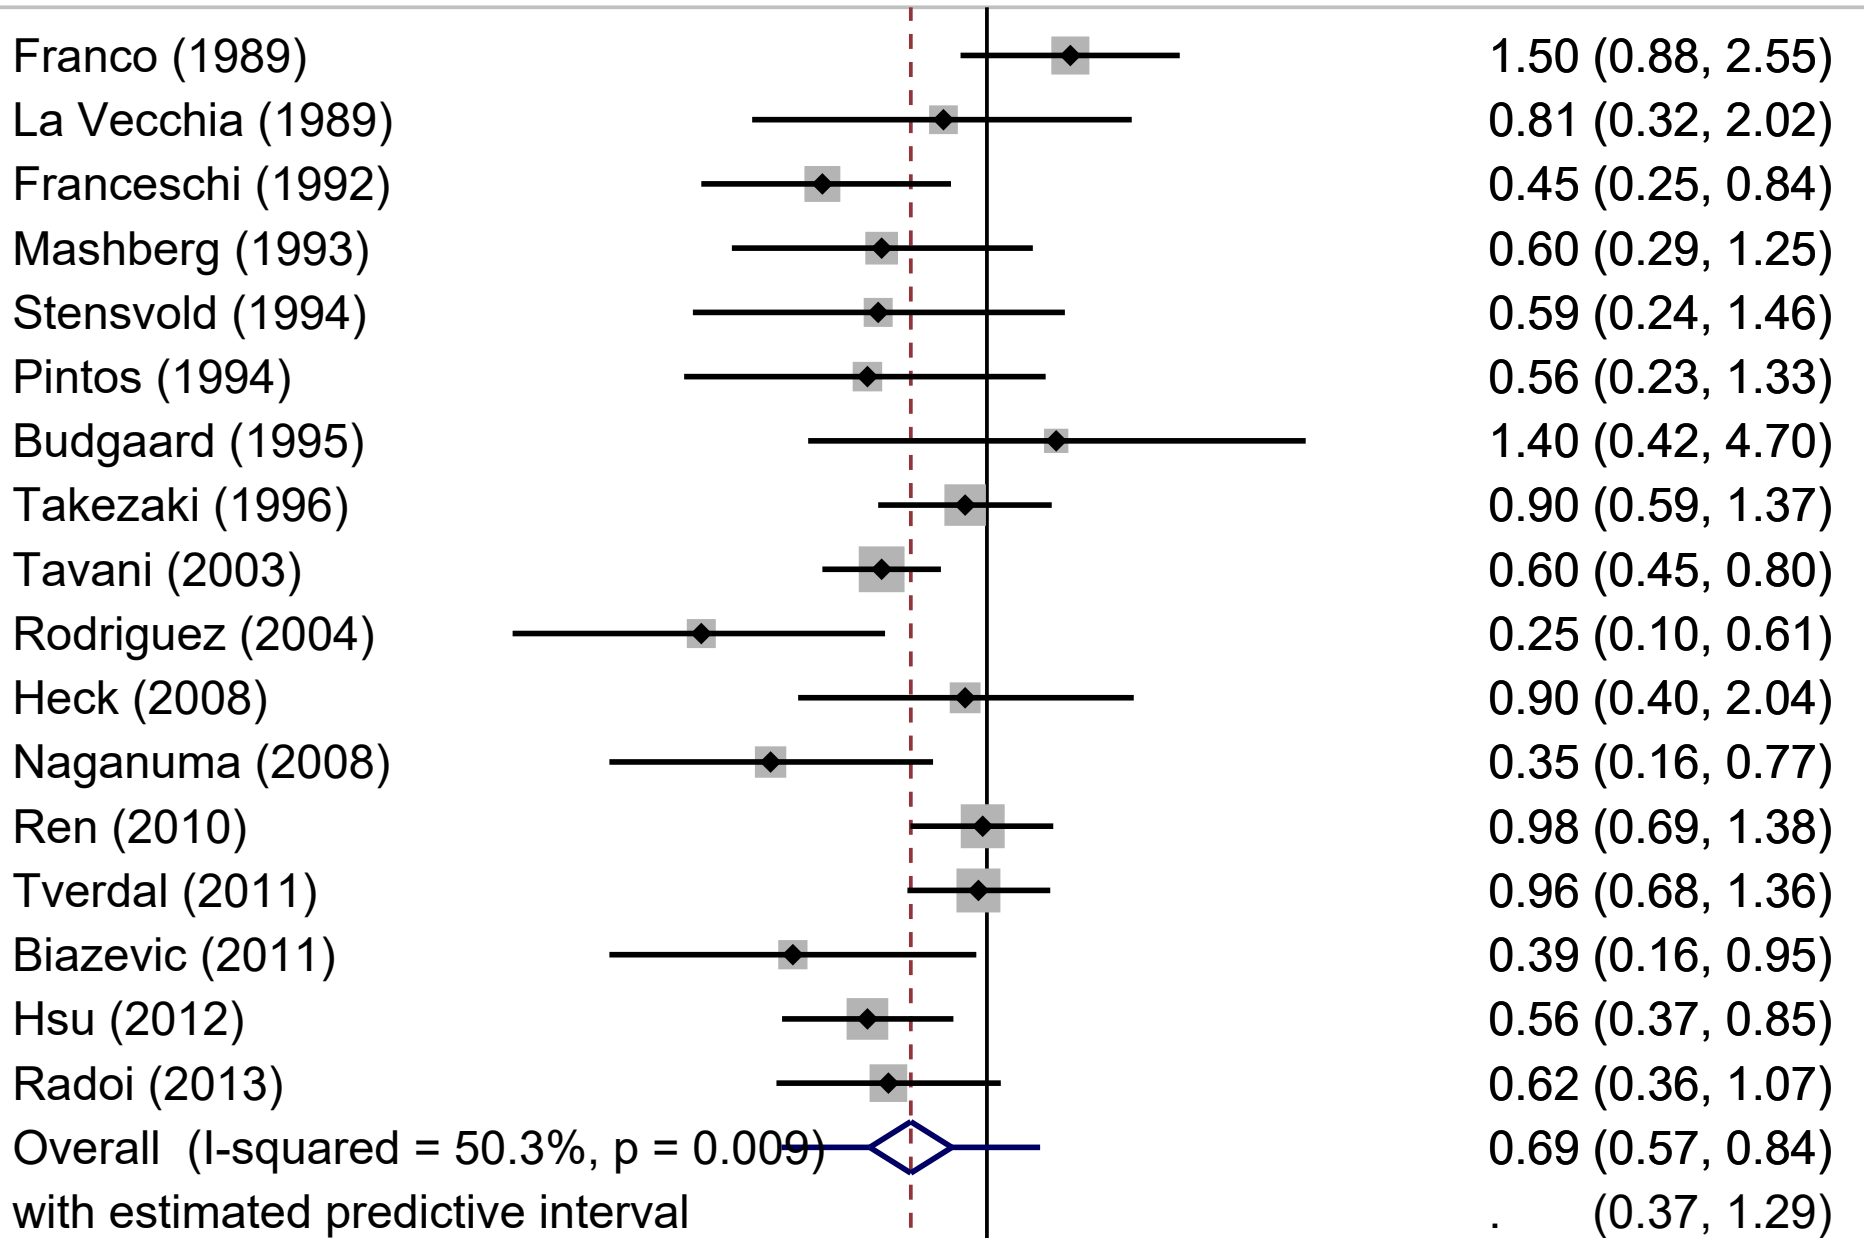

NOTE: Weights are from random effects analysis

# Supplementary figure 29, Ovarian cancer, H/L

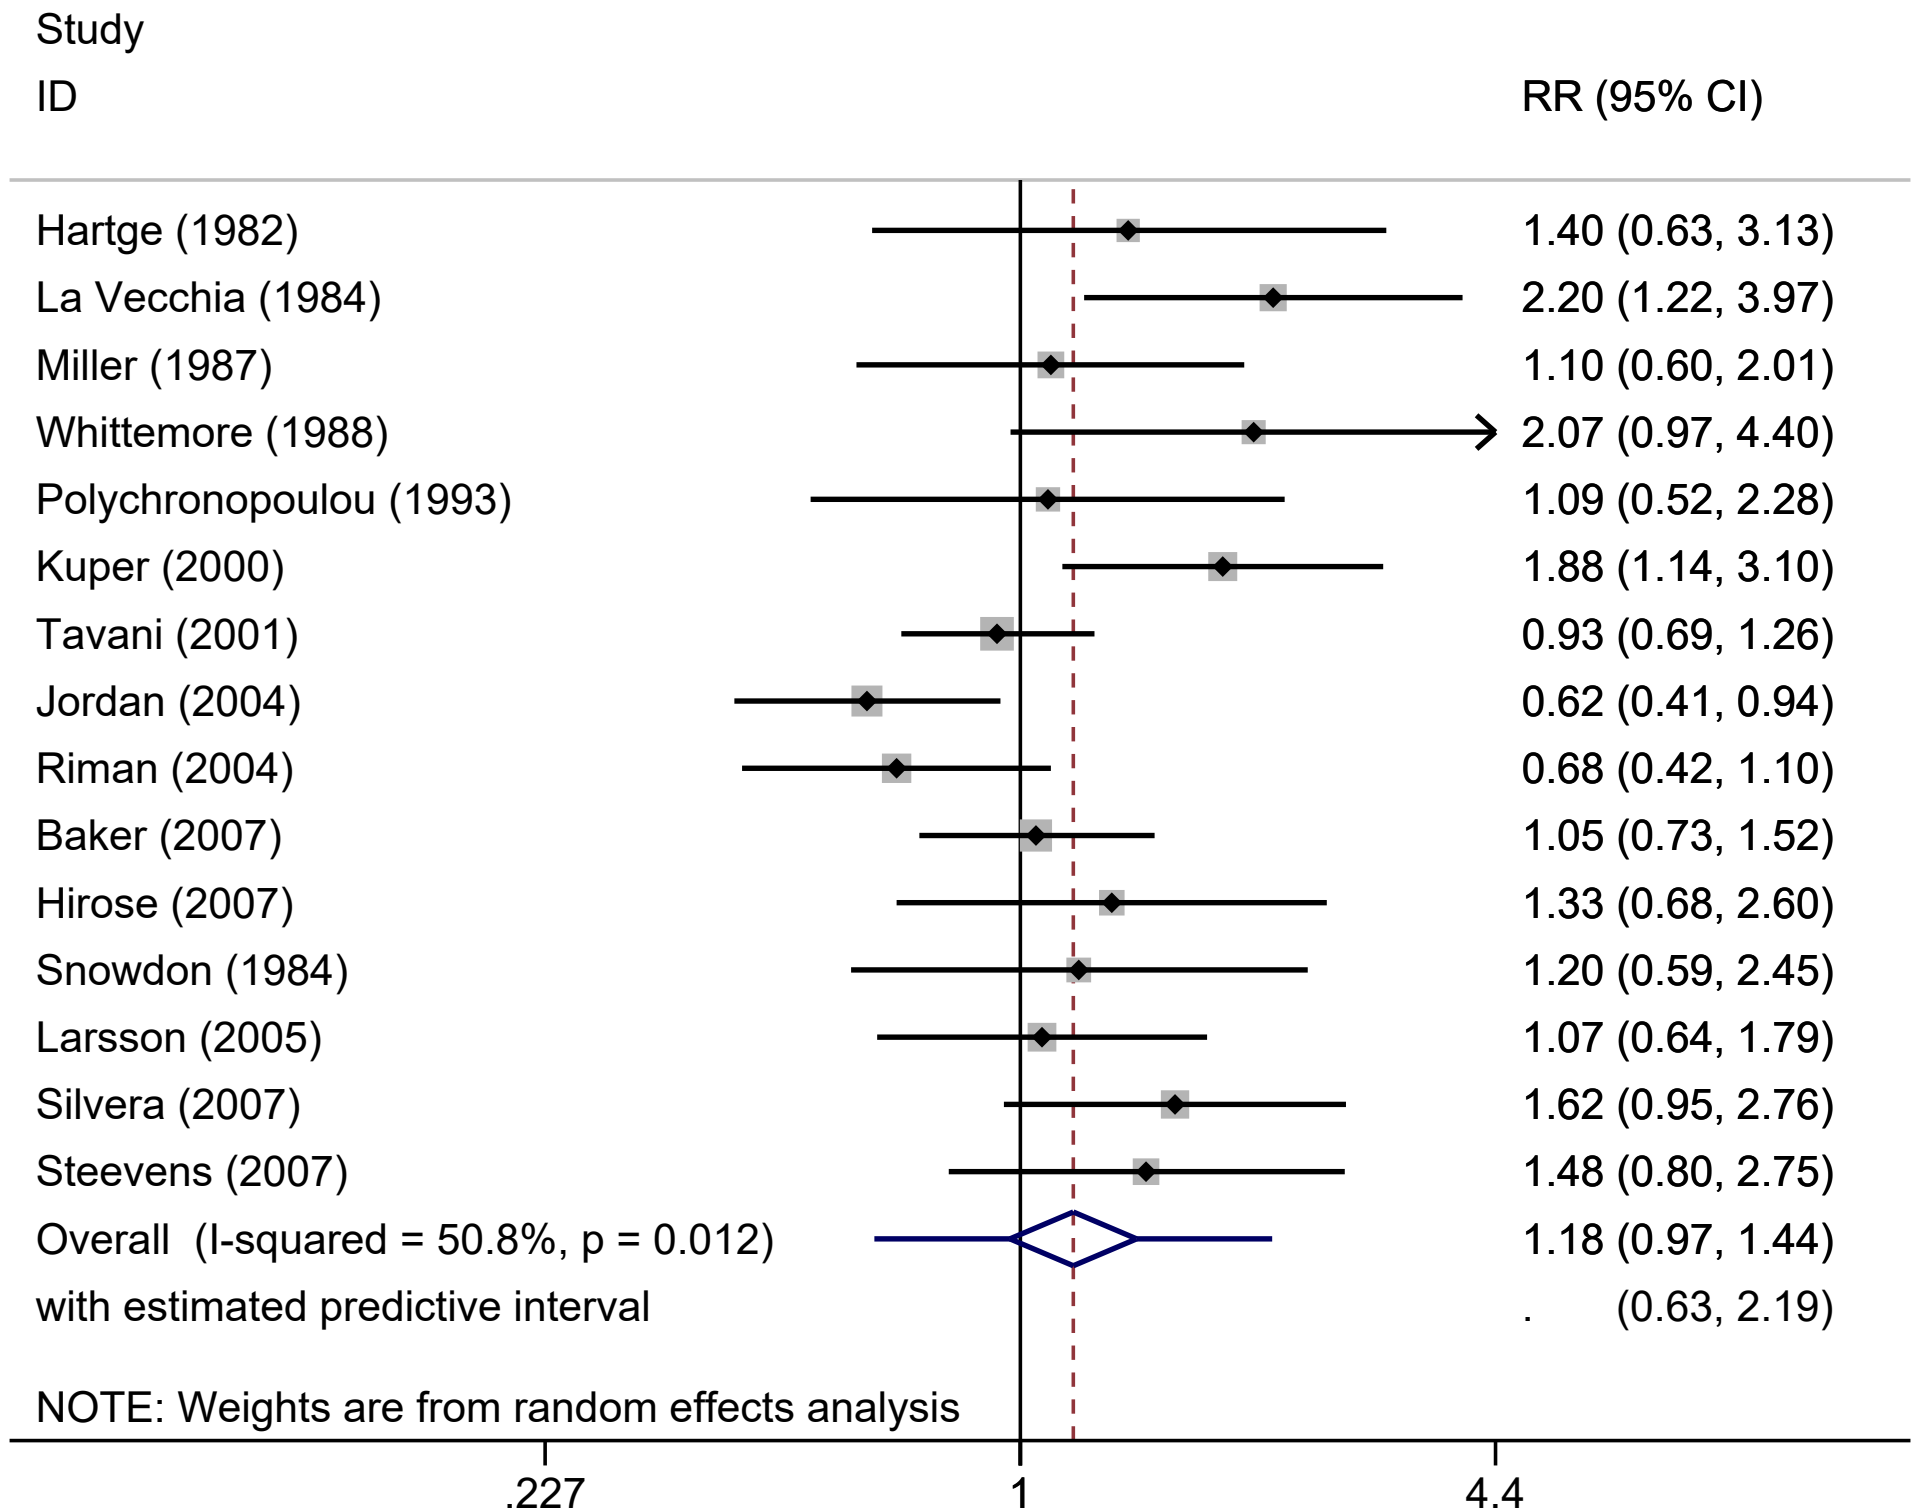

# Supplementary figure 30, Pancreatic cancer, H/L

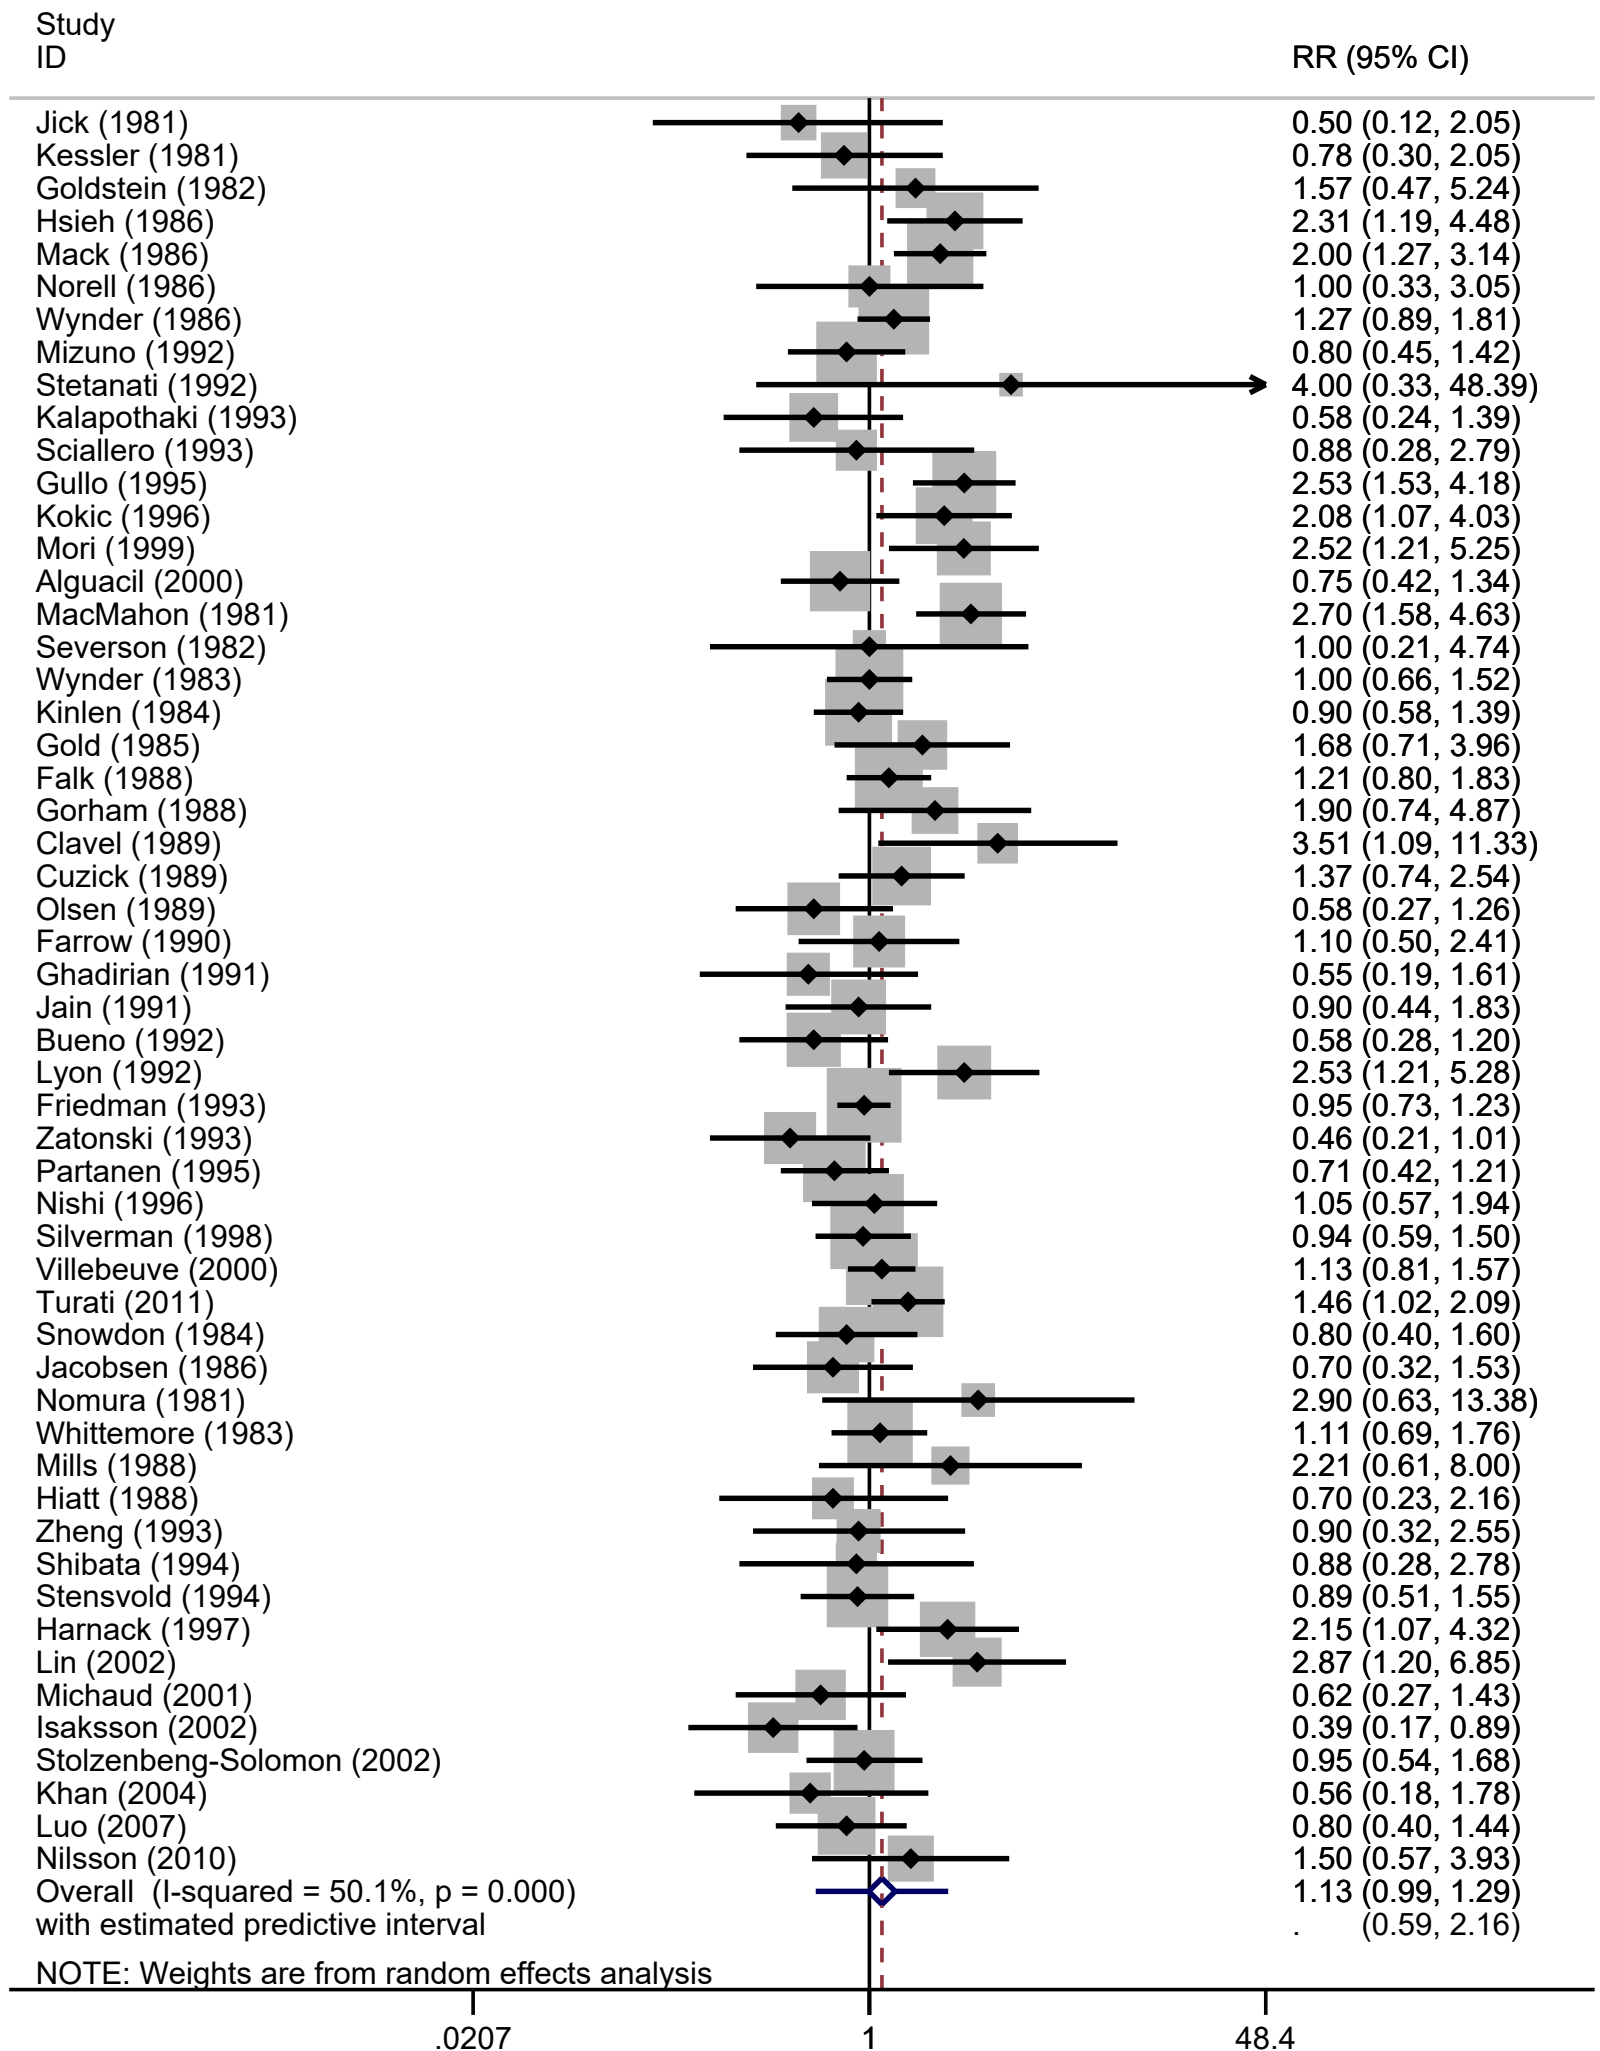

# Supplementary figure 31, Pancreatic cancer, Per 1 cup

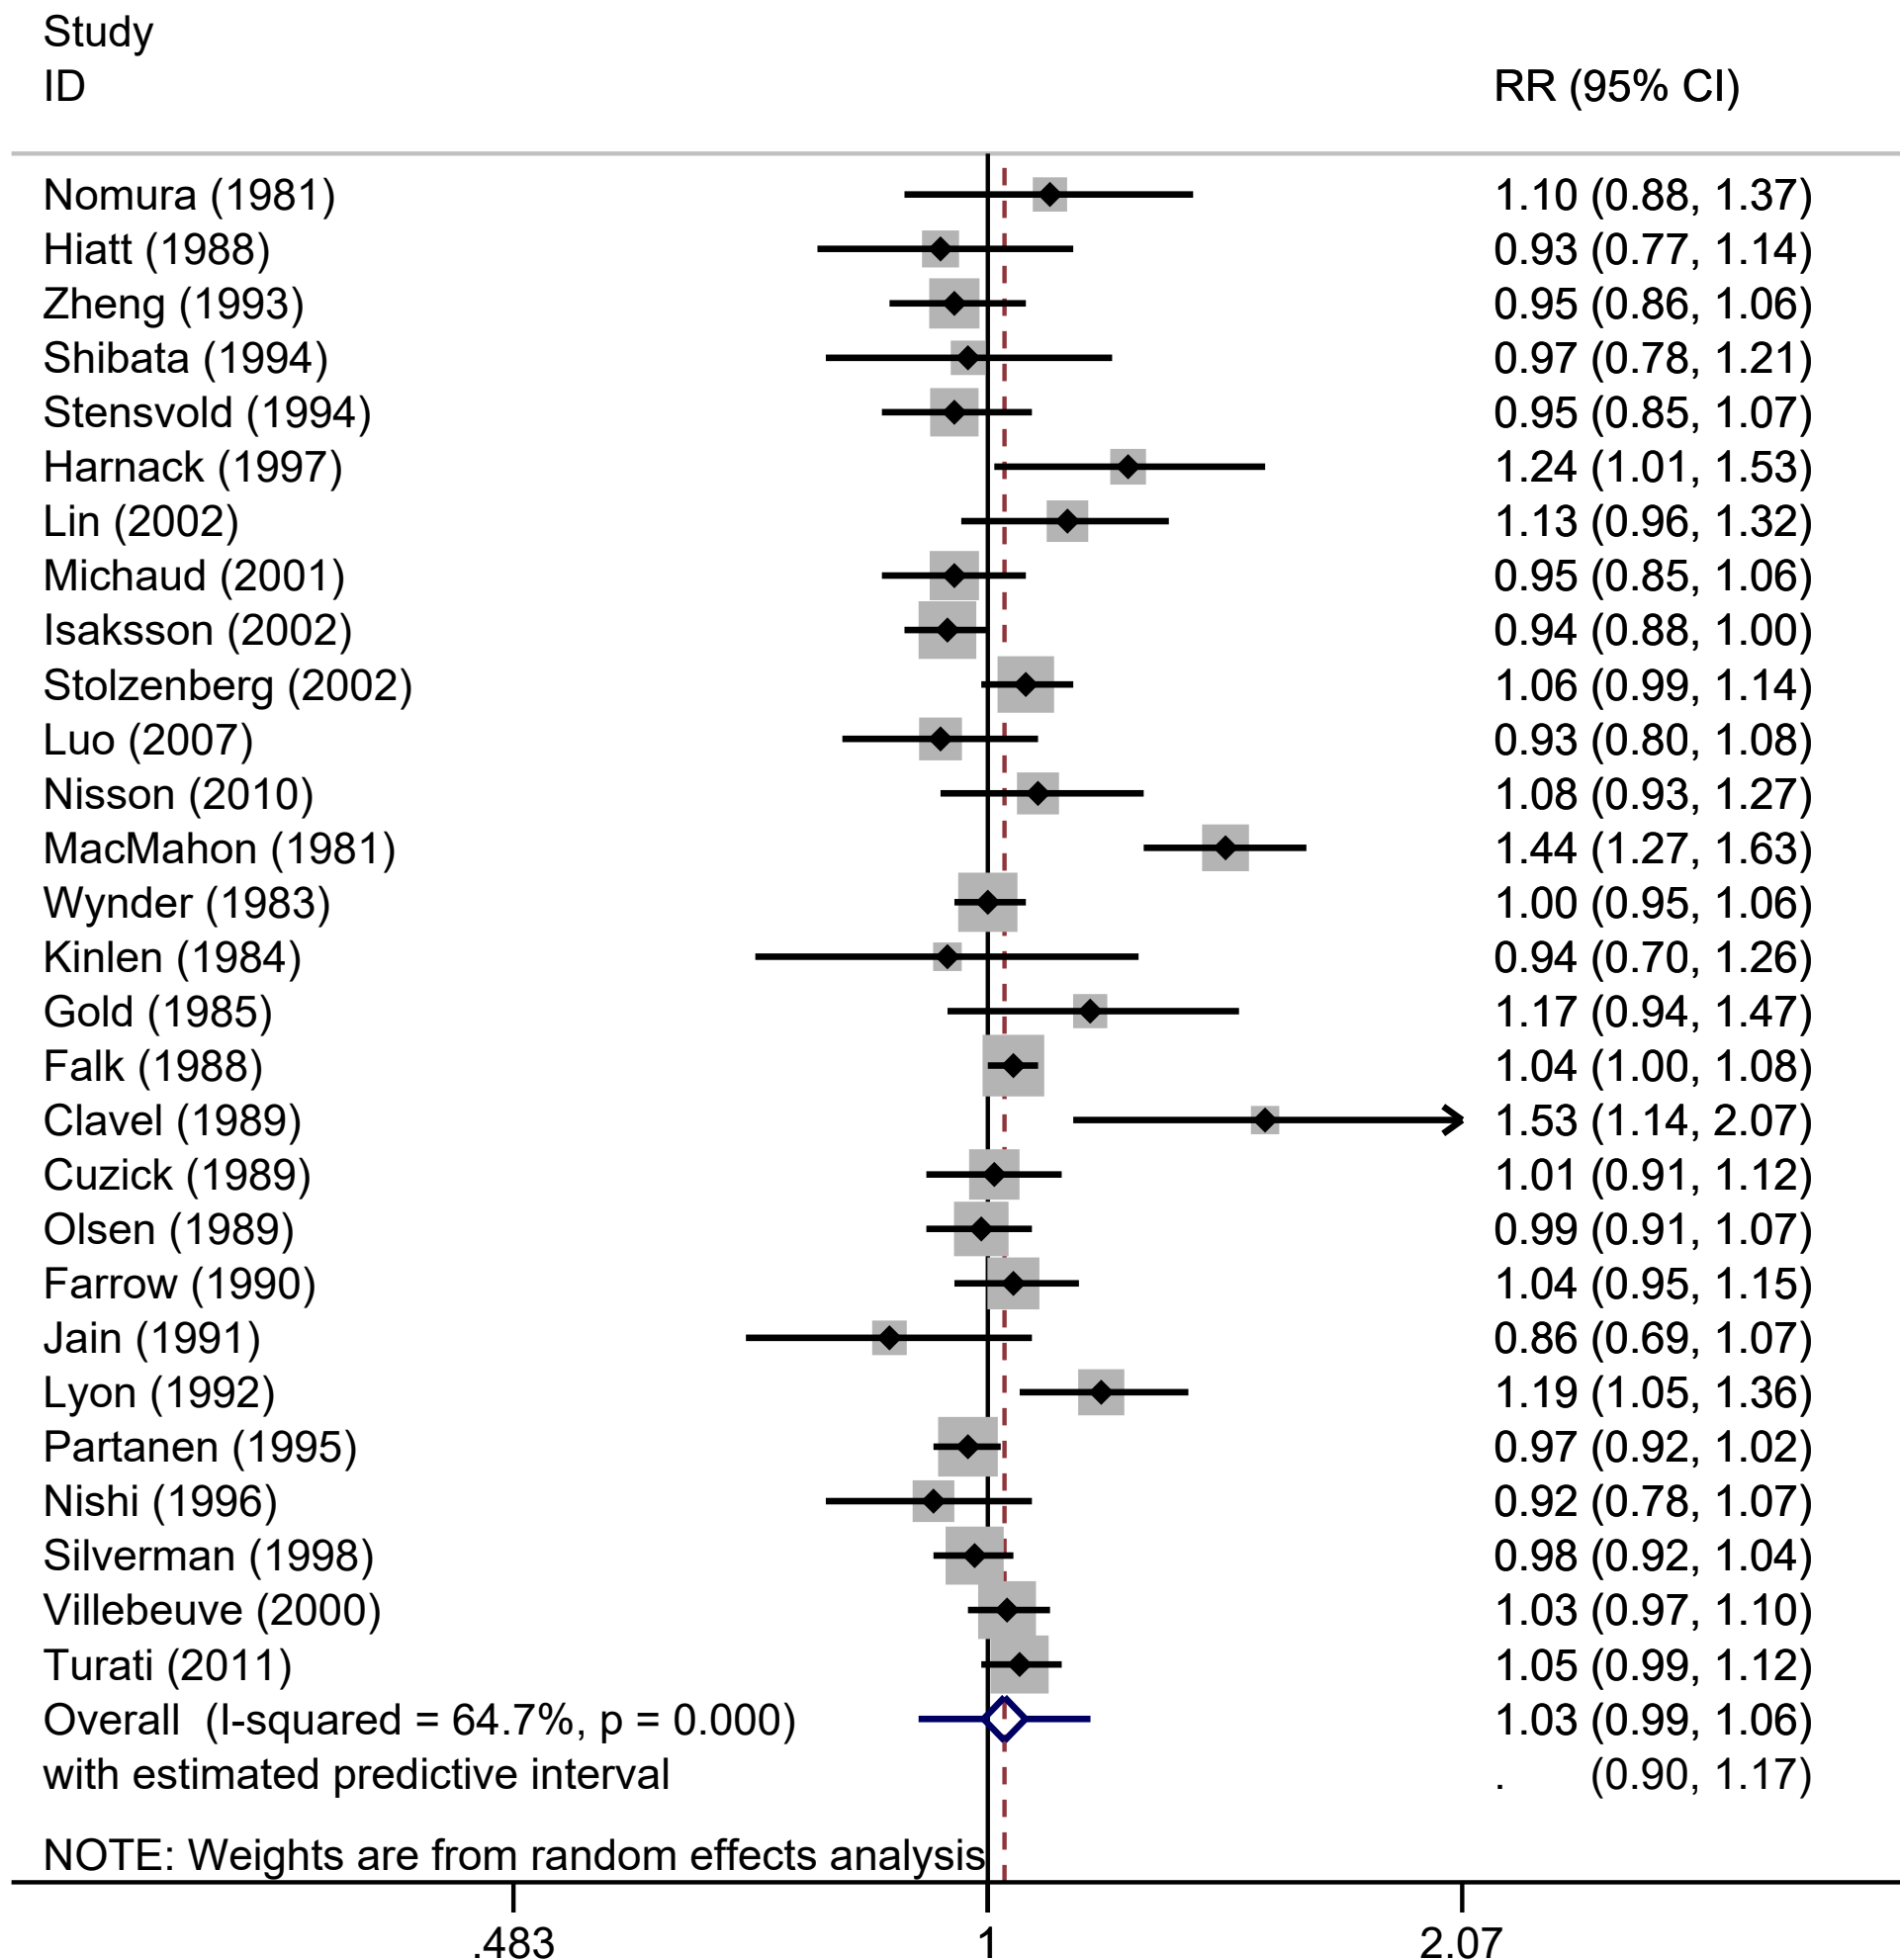

# Supplementary figure 32, Prostate cancer, H/L

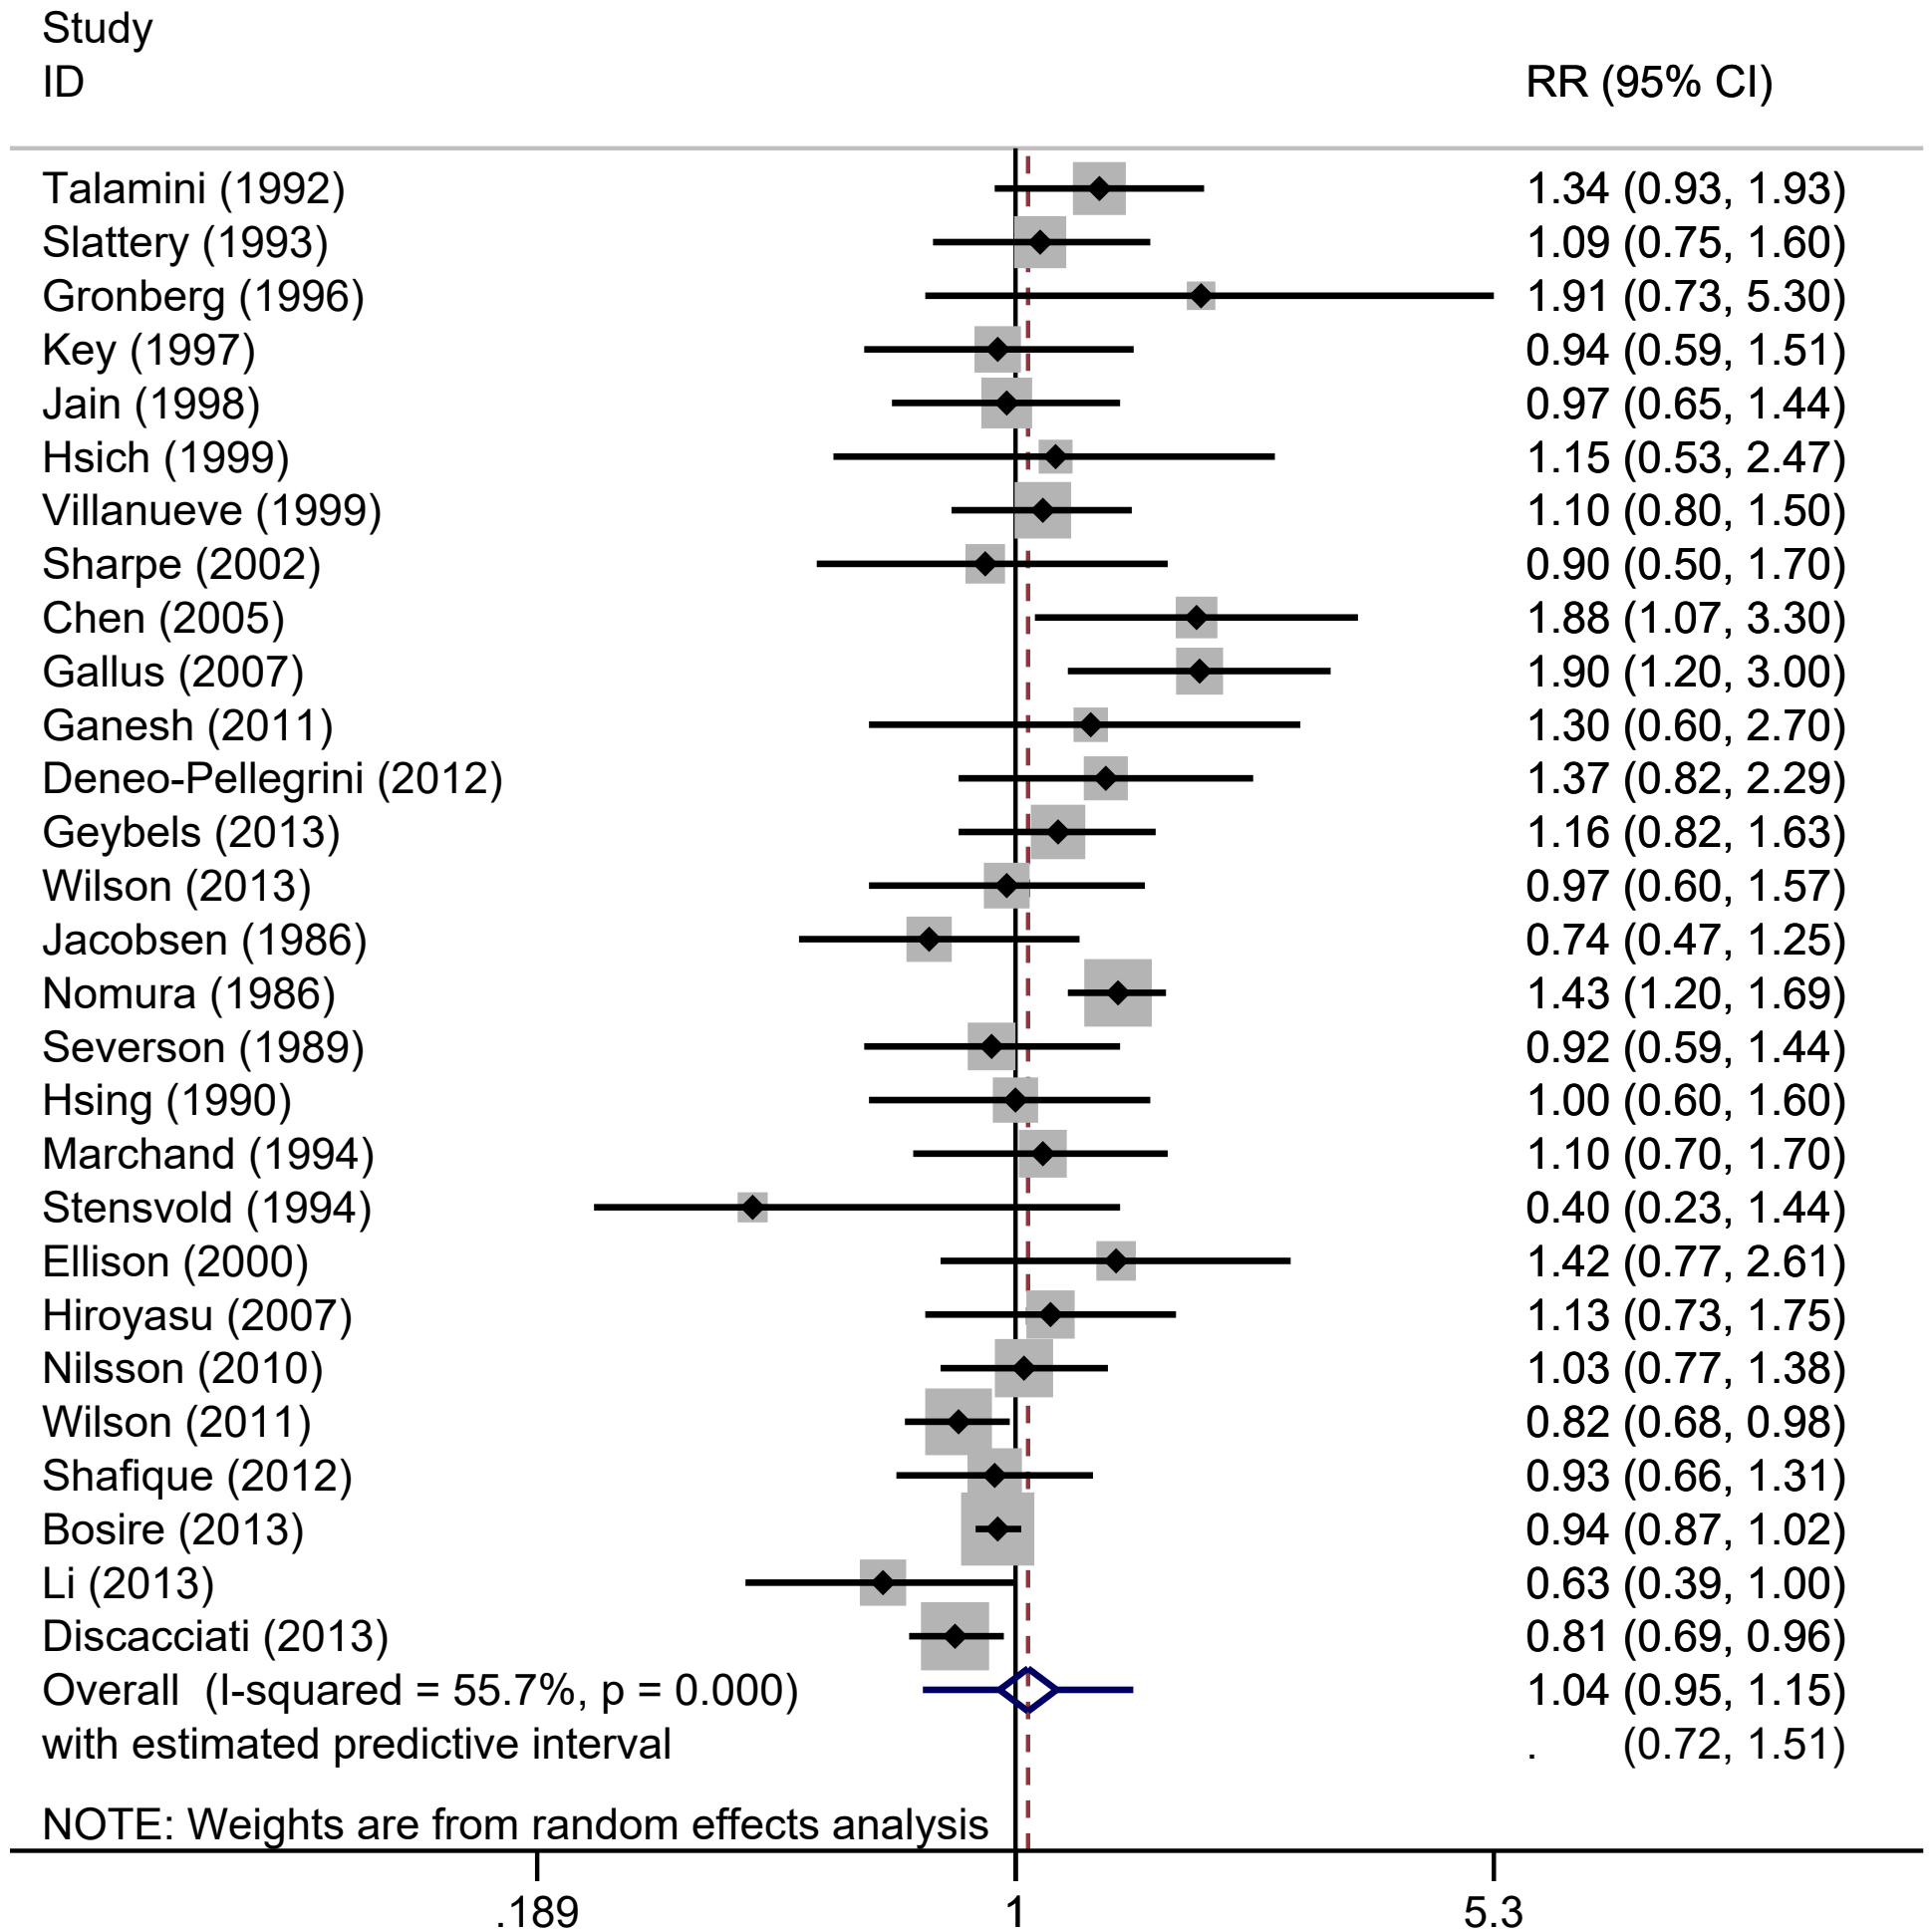



# Supplementary figure 33, Rectal cancer, H/L

Study

ID

RR (95% CI)

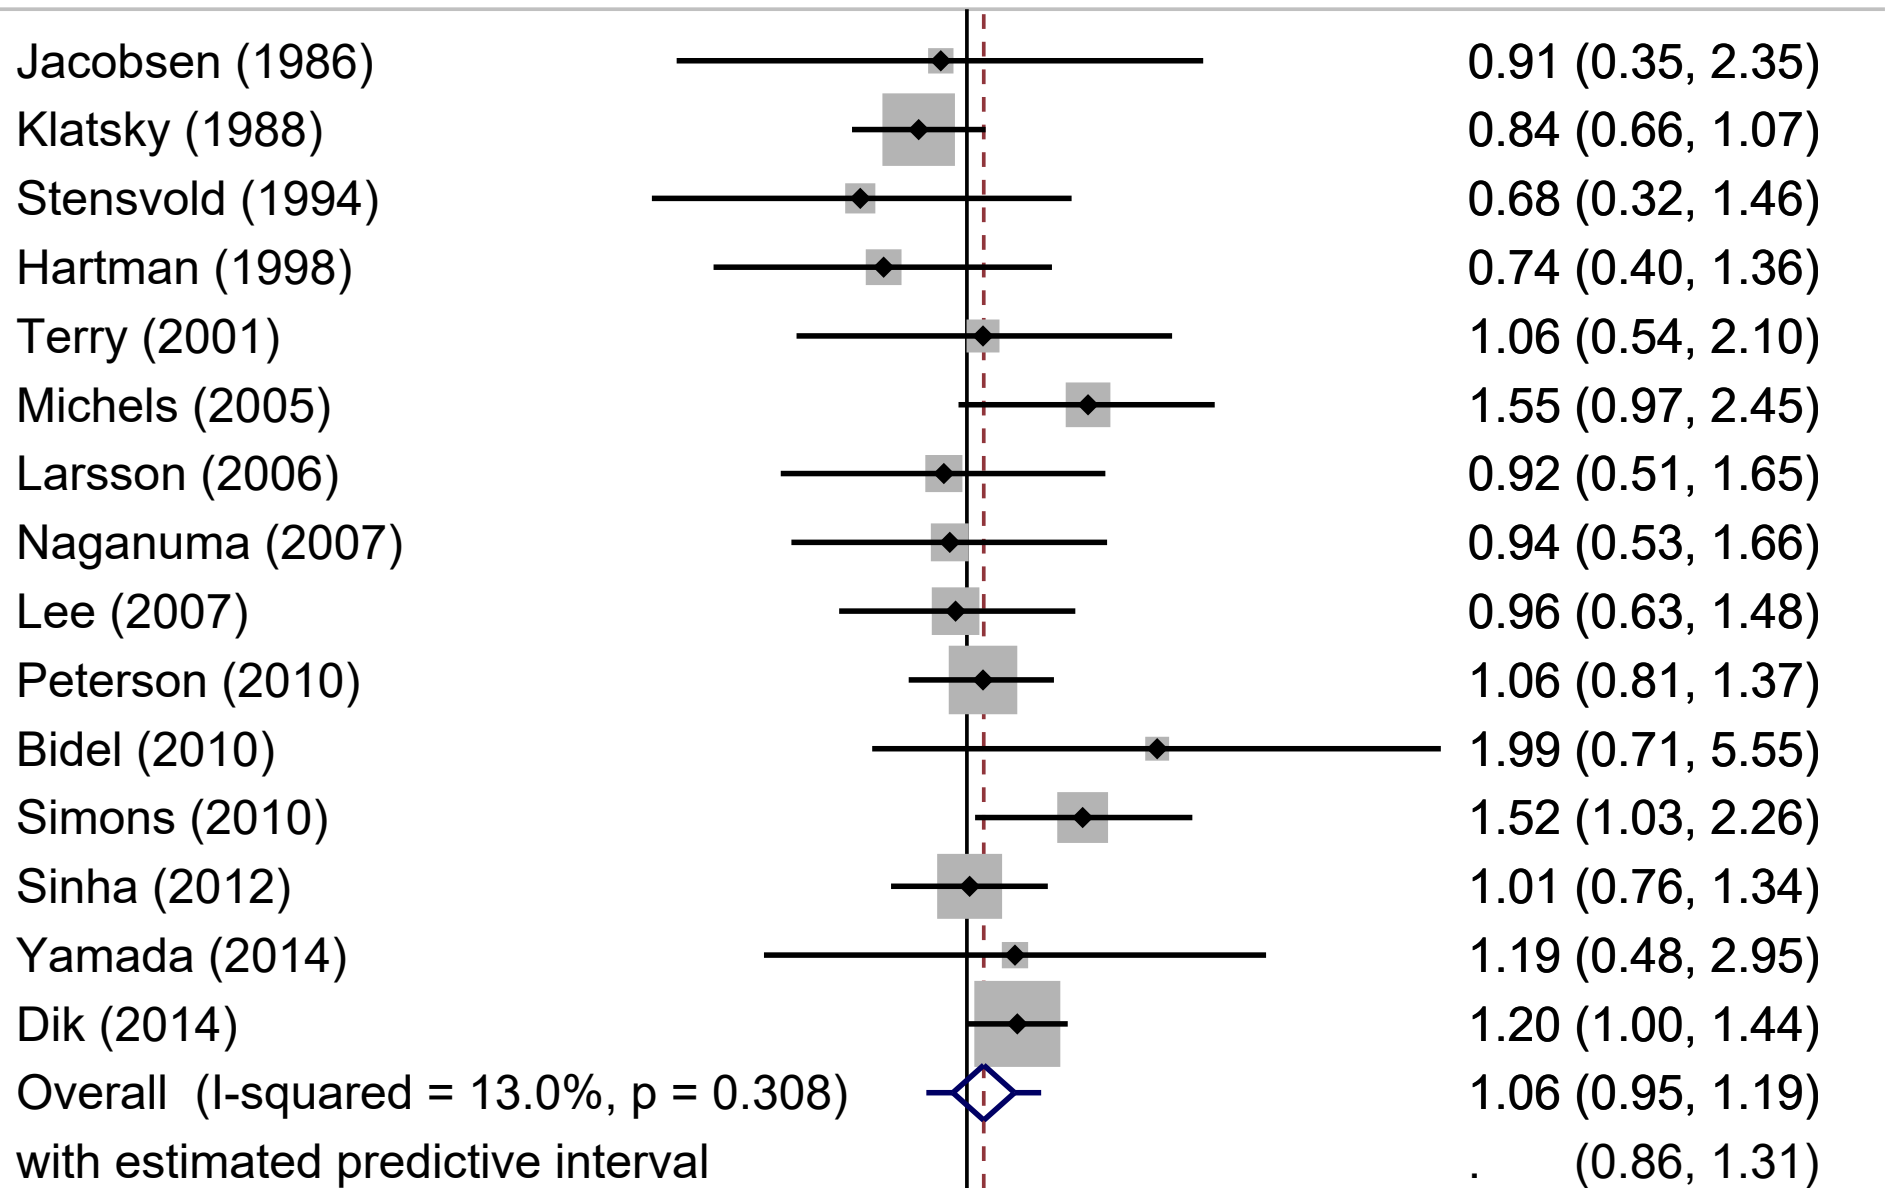

NOTE: Weights are from random effects analysis

.18

1

5.55

# Supplementary figure 34, Rectal cancer, Per 1 cup

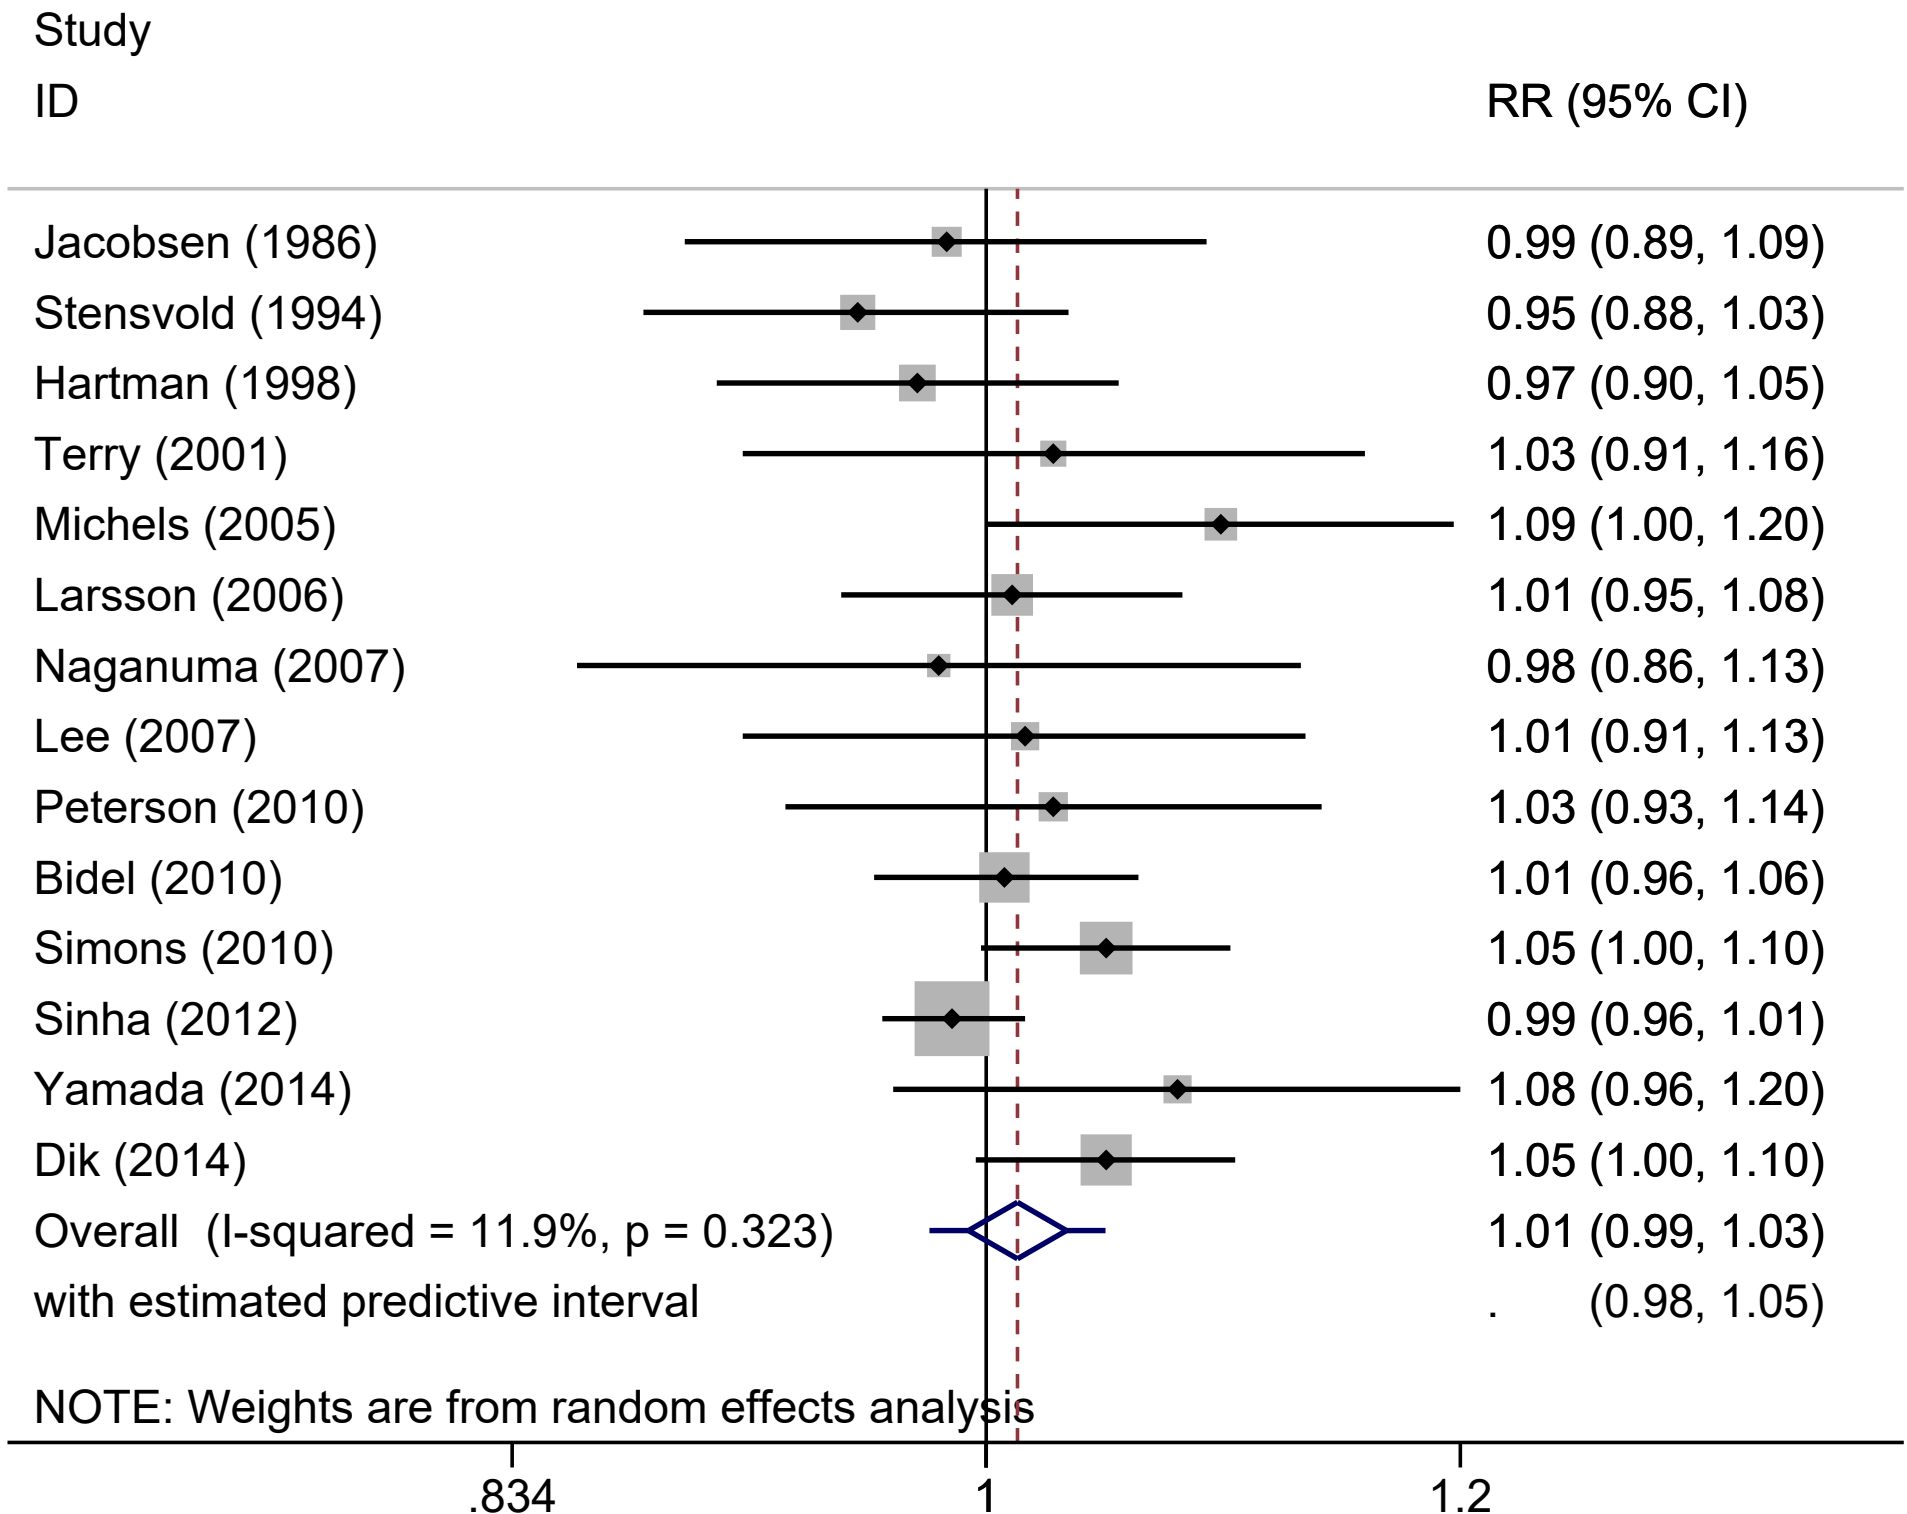

# Supplementary figure 35, Thyroid cancer, H/L

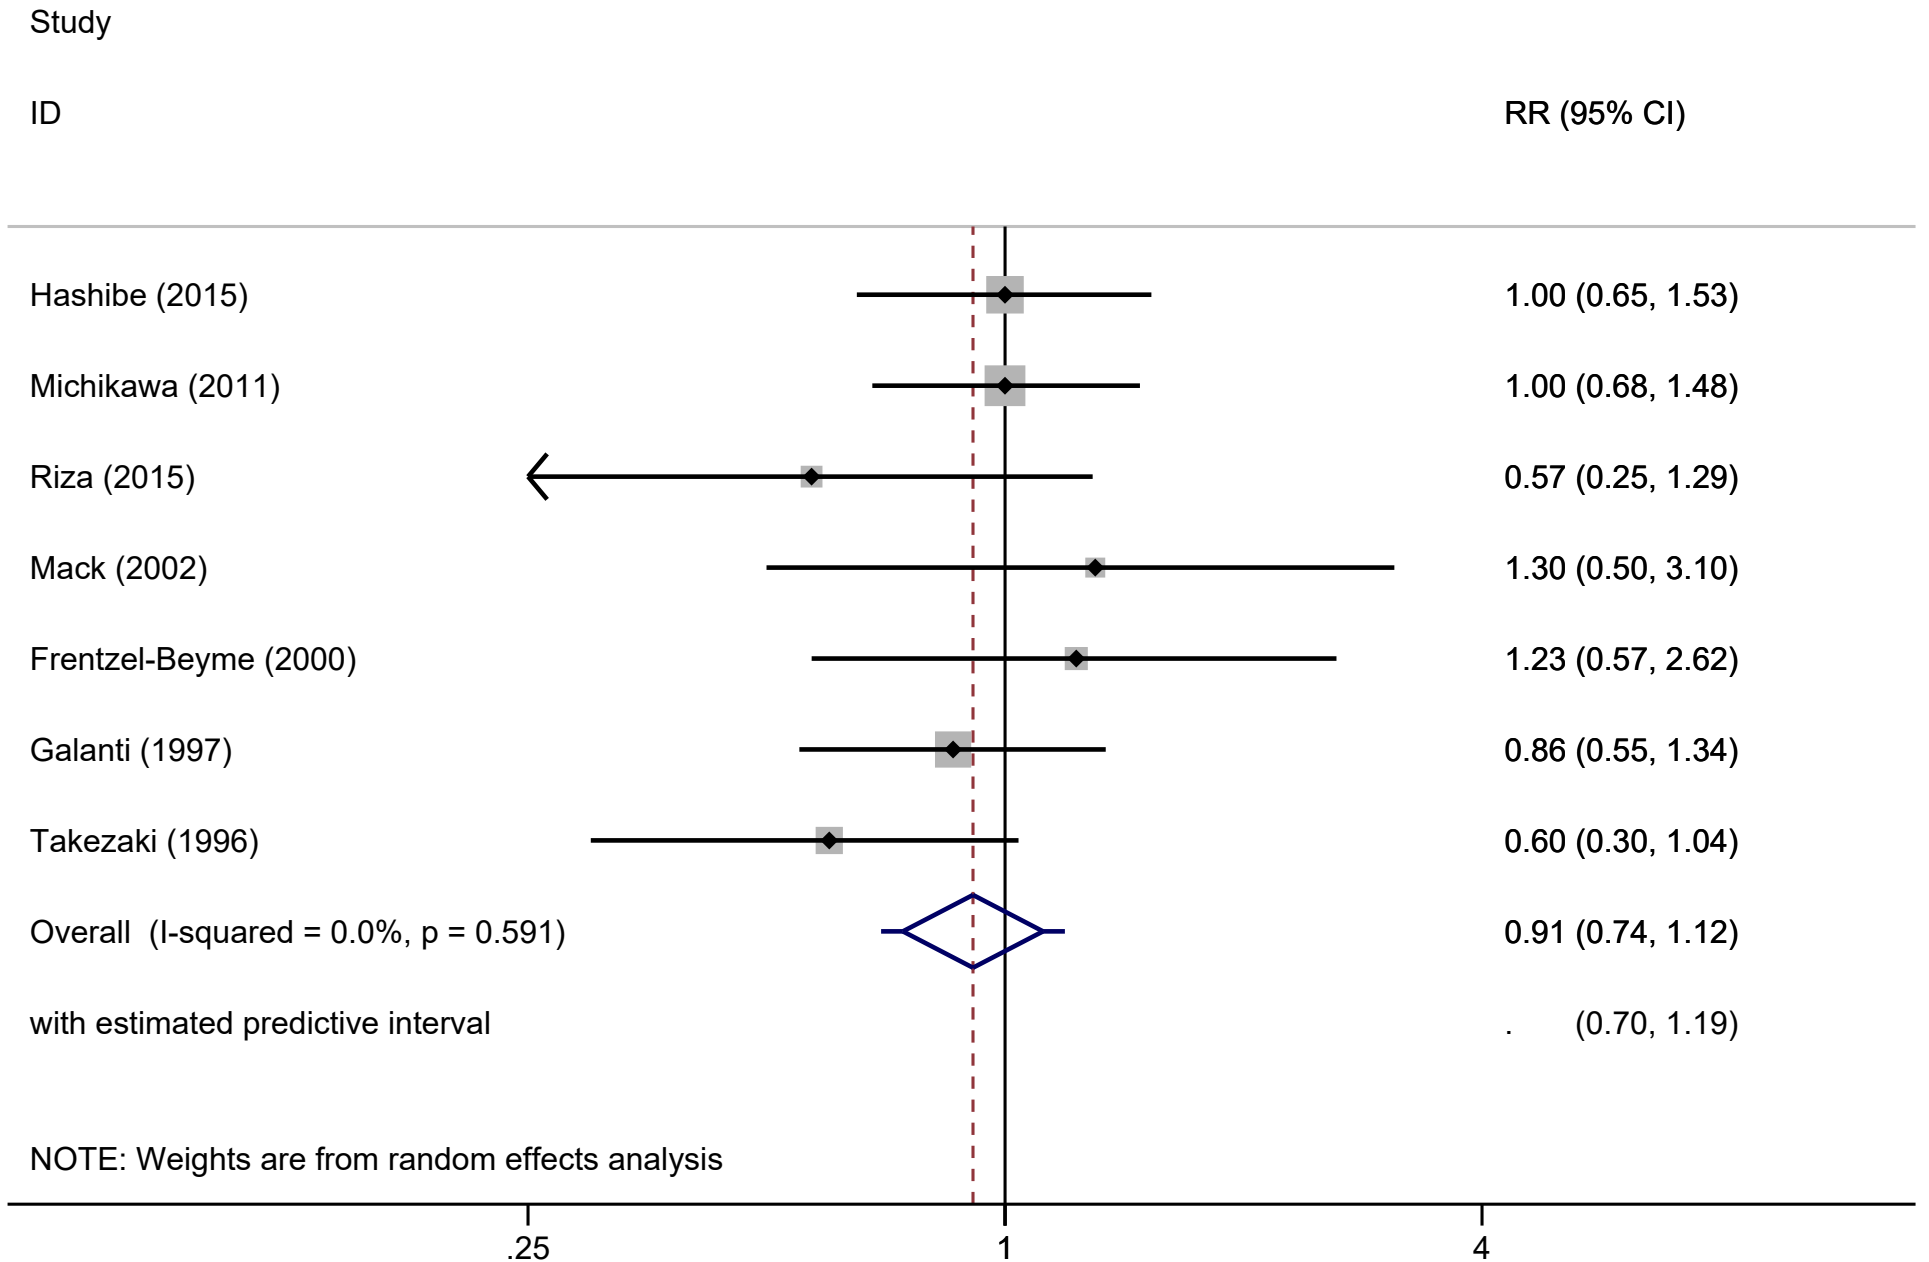

# Supplementary figure 36, Biliary tract cancer, H/L

Study

ID RR (95% CI)

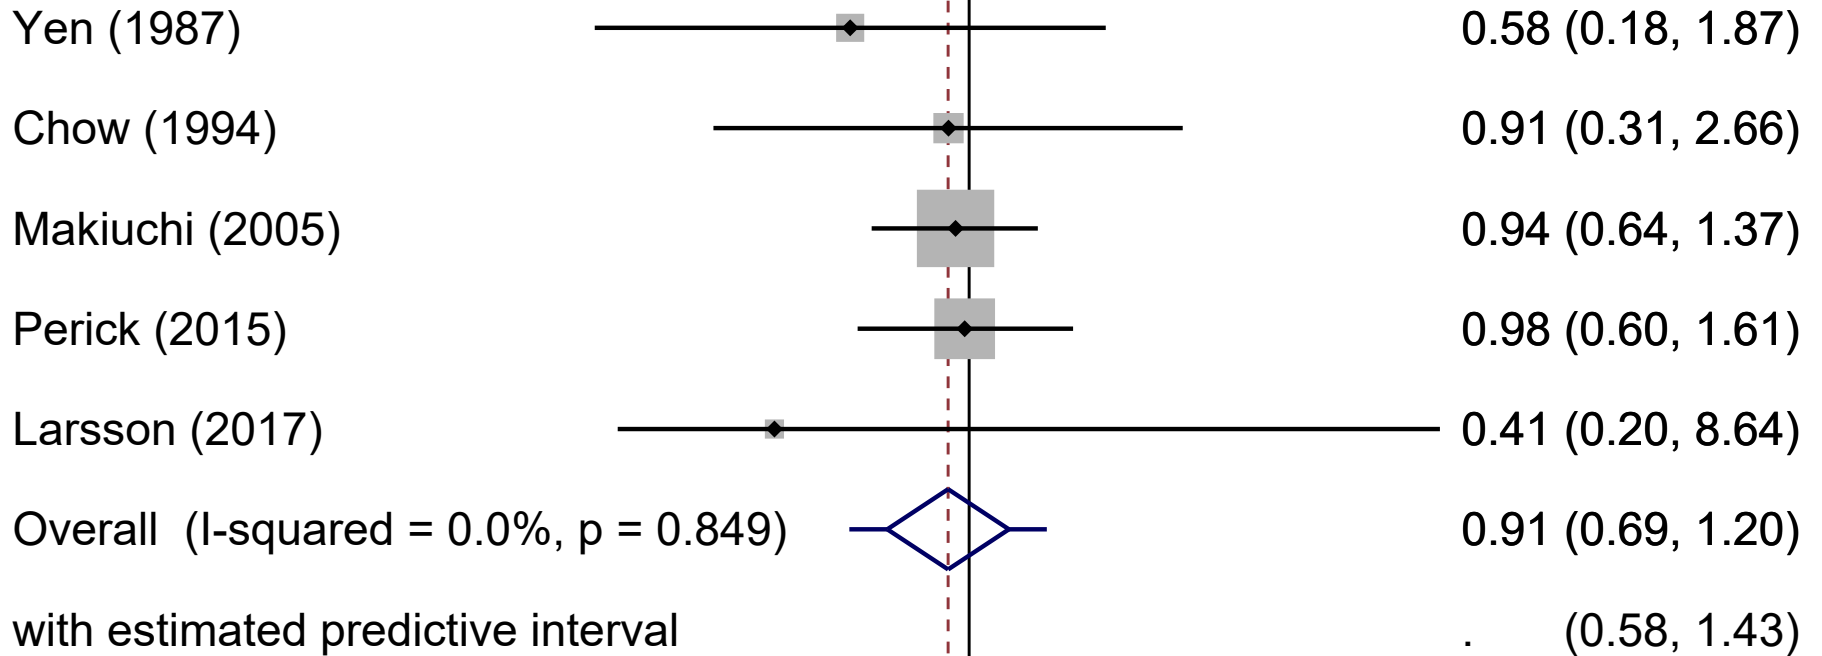

NOTE: Weights are from random effects analysis

# Supplementary figure 37, Bladder cancer, H/L, only cohort studies

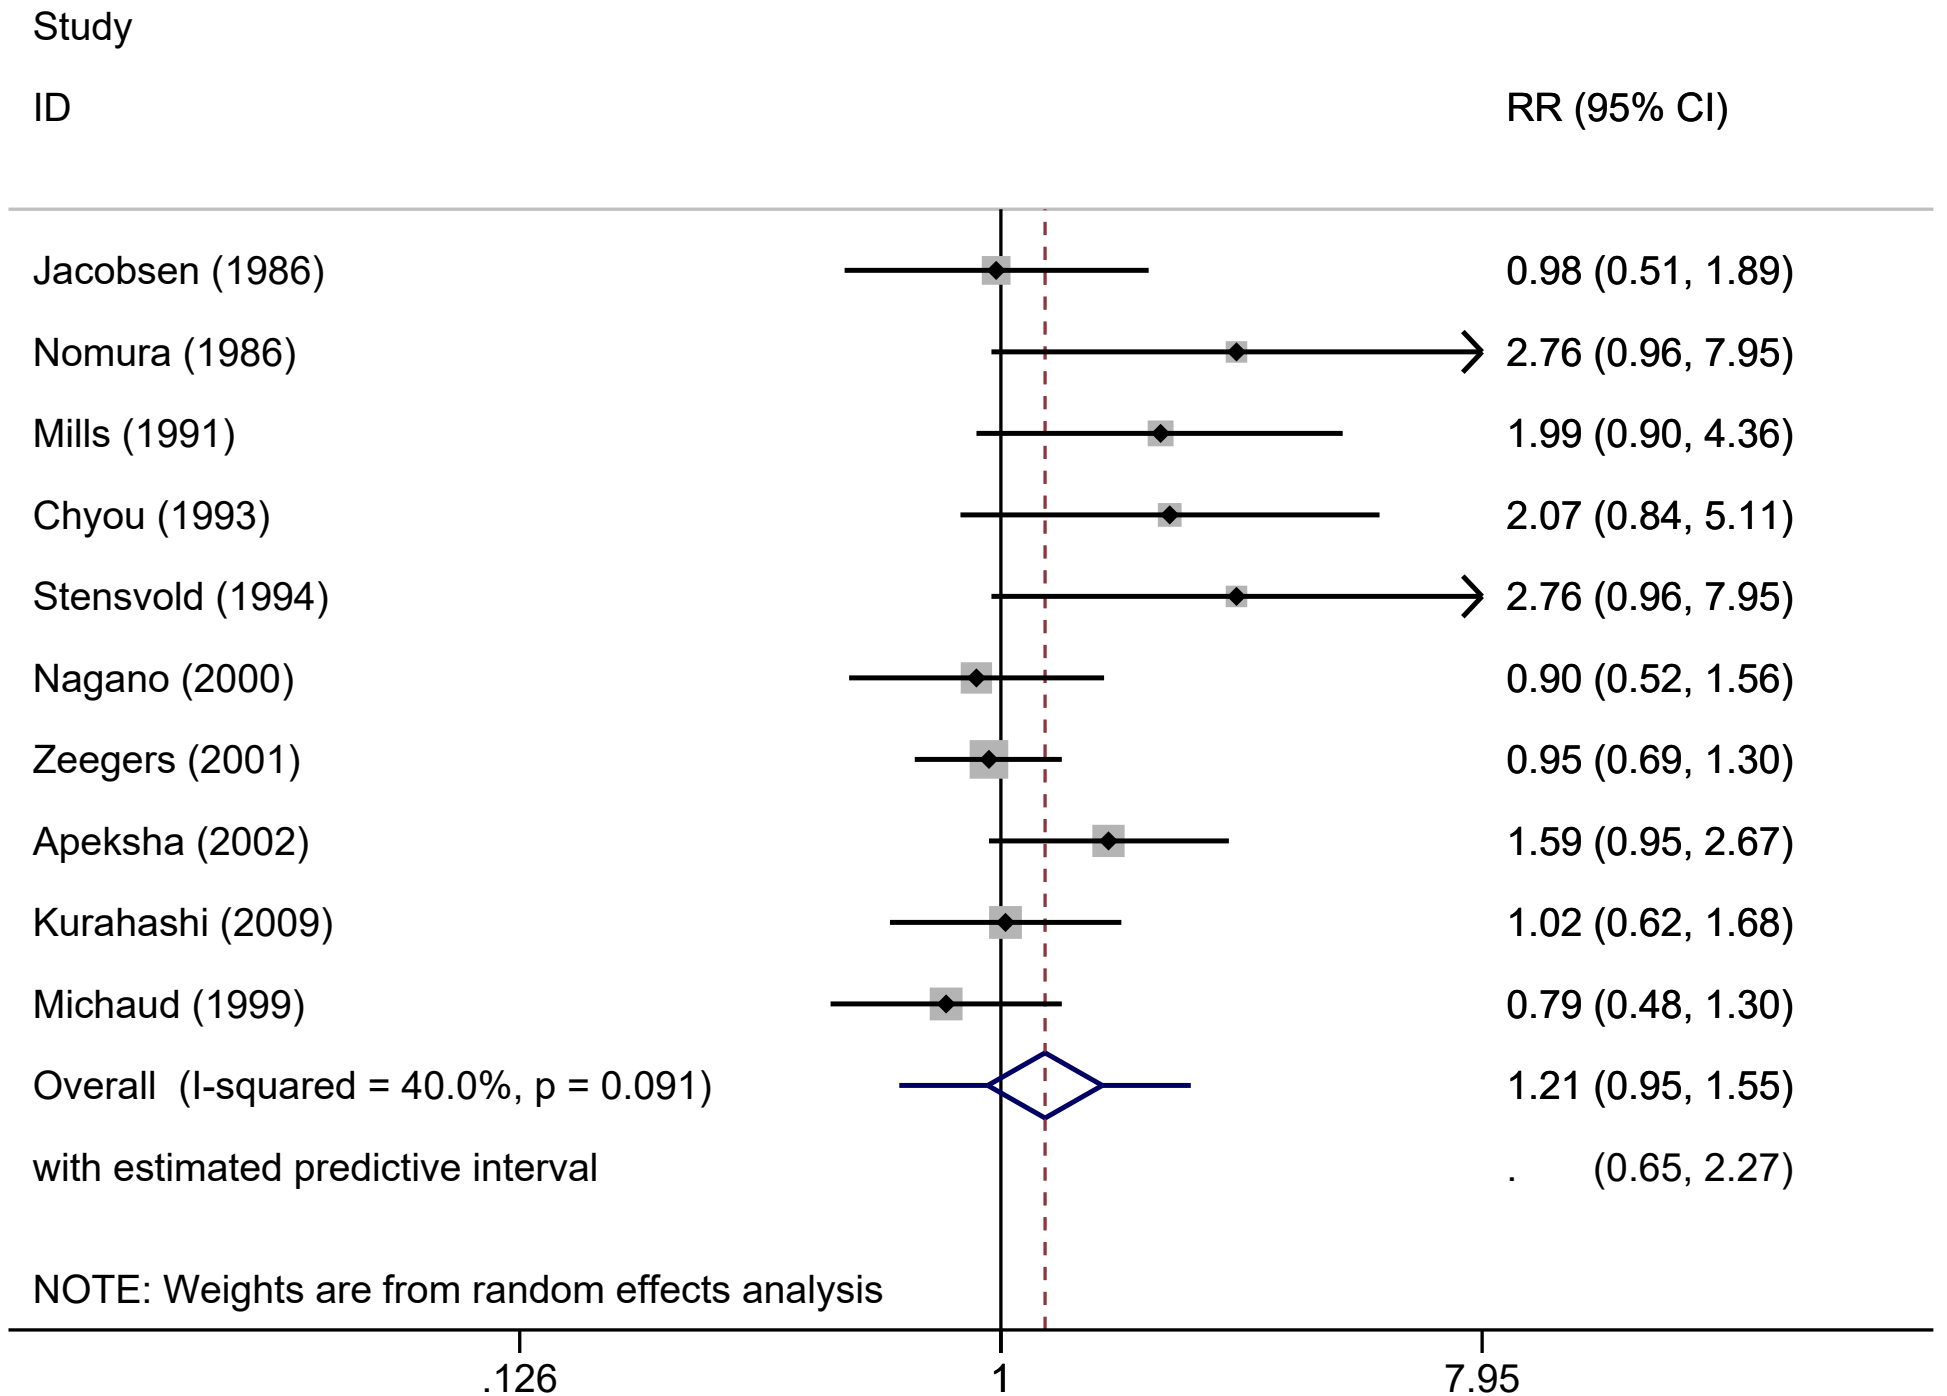

# Supplementary figure 38, Breast cancer, H/L, only cohort studies

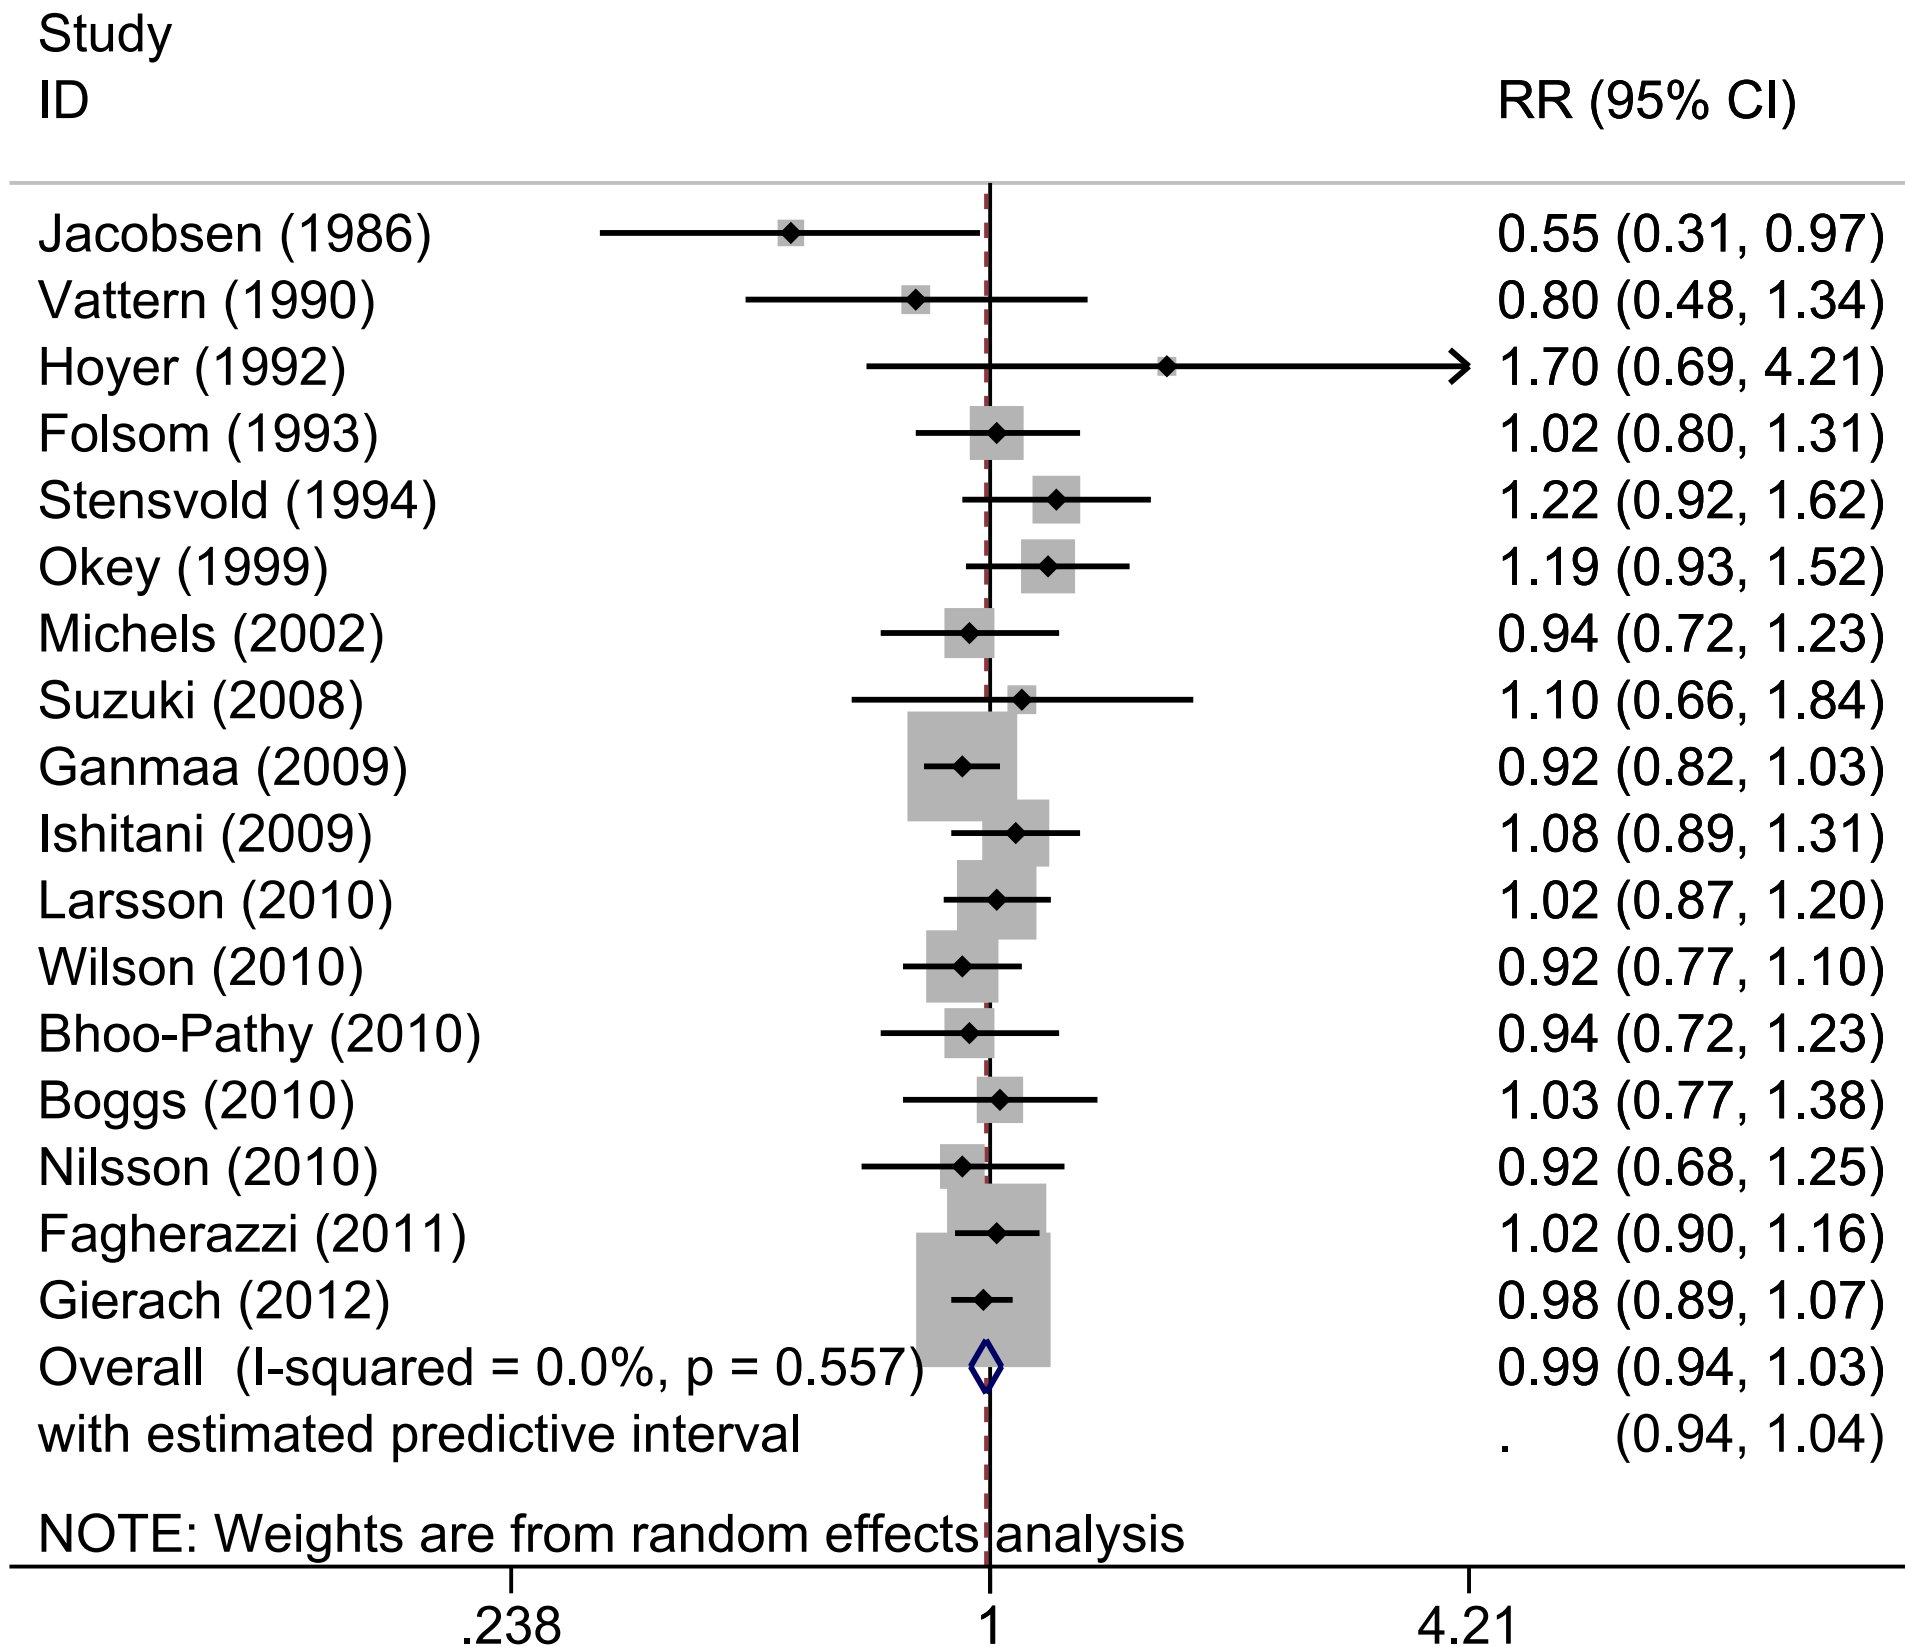

# Supplementary figure 39, Breast cancer, Per 1 cup, only cohort studies

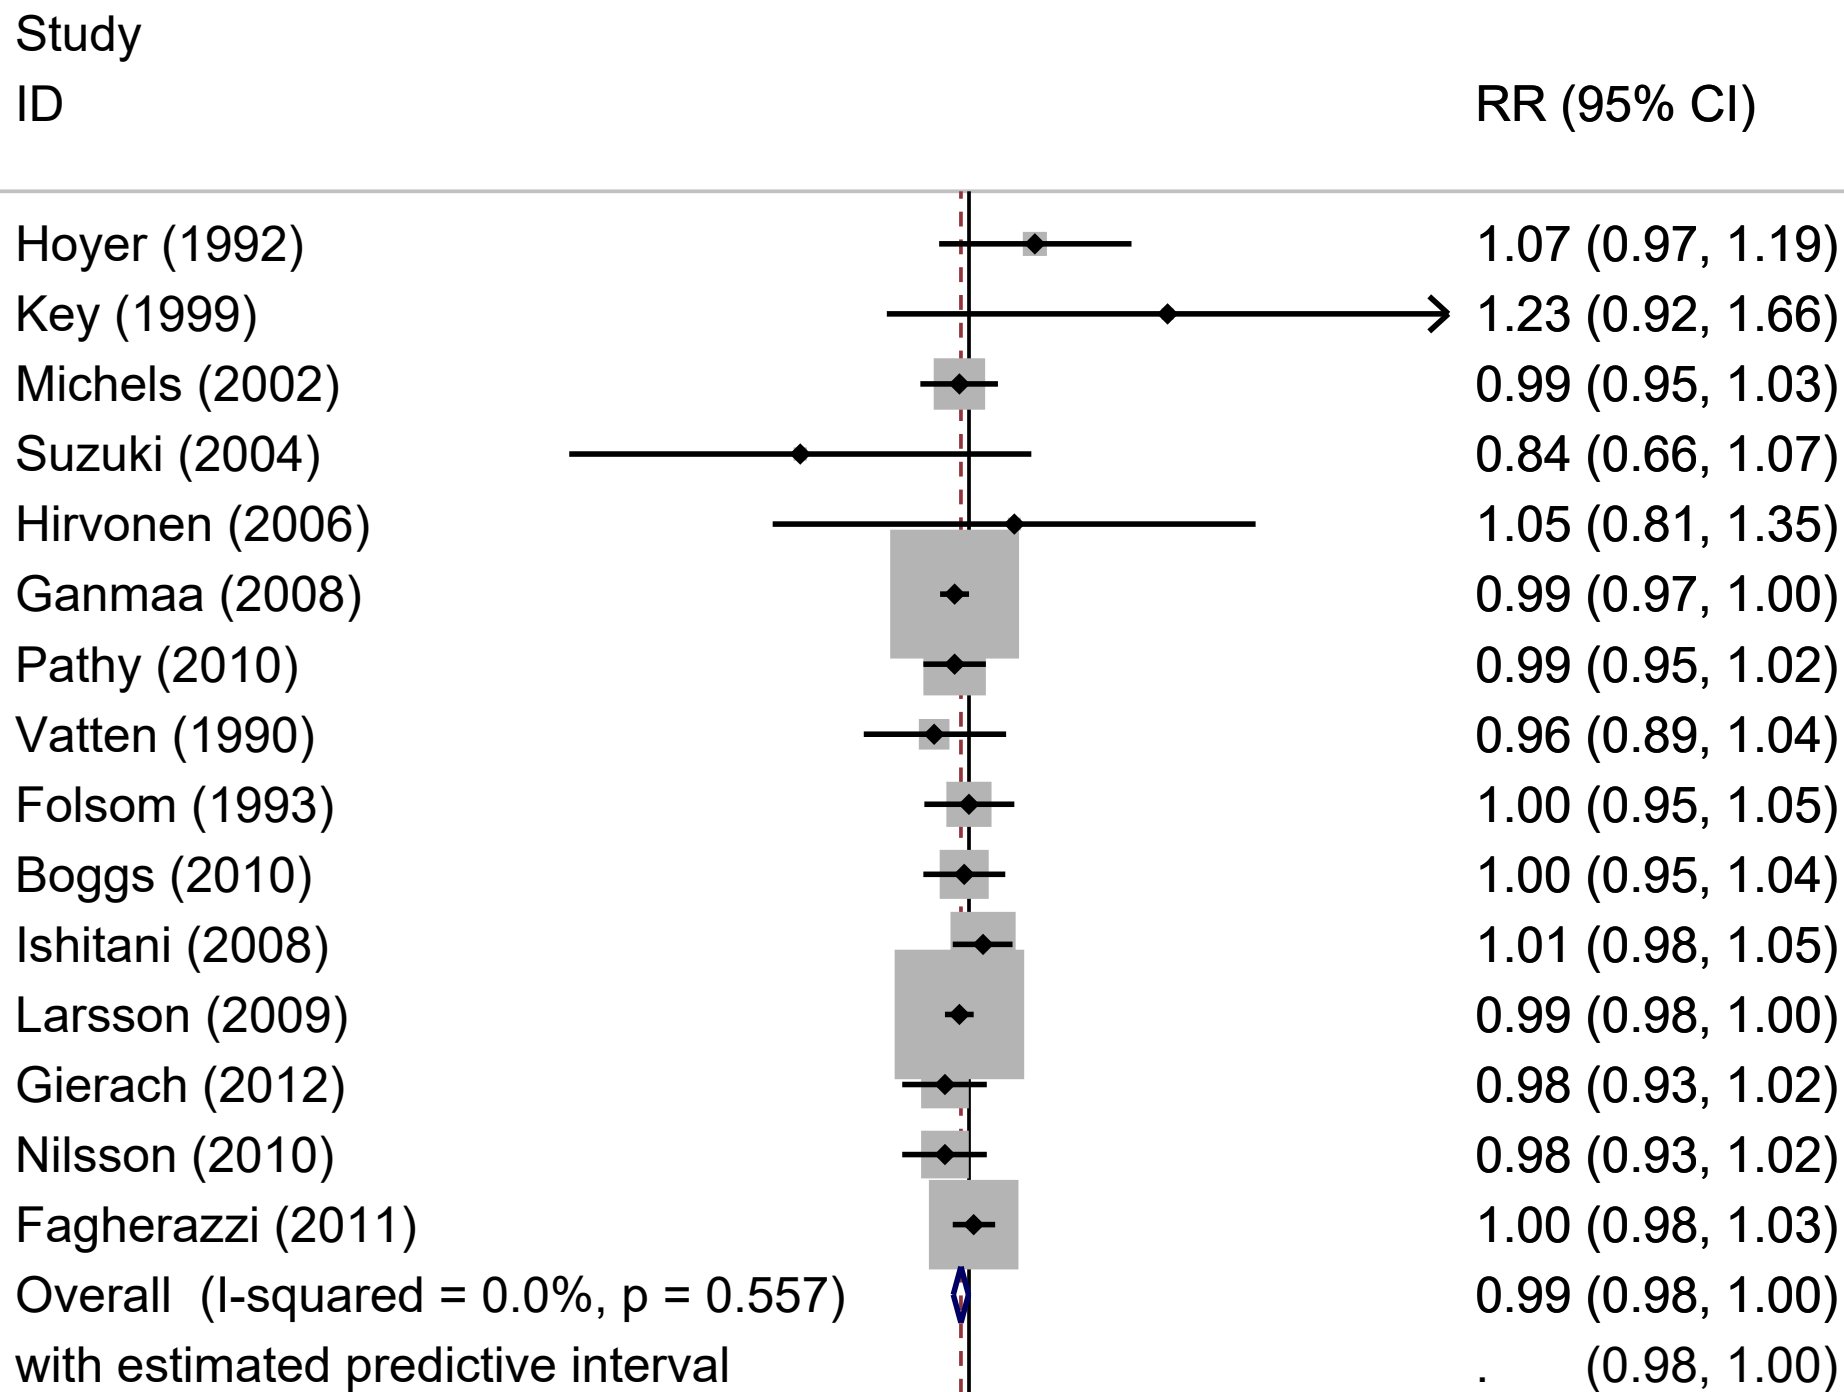

NOTE: Weights are from random effects analysis

.603

1

1.66

# Supplementary figure 40, Colon cancer, H/L, only cohort studies

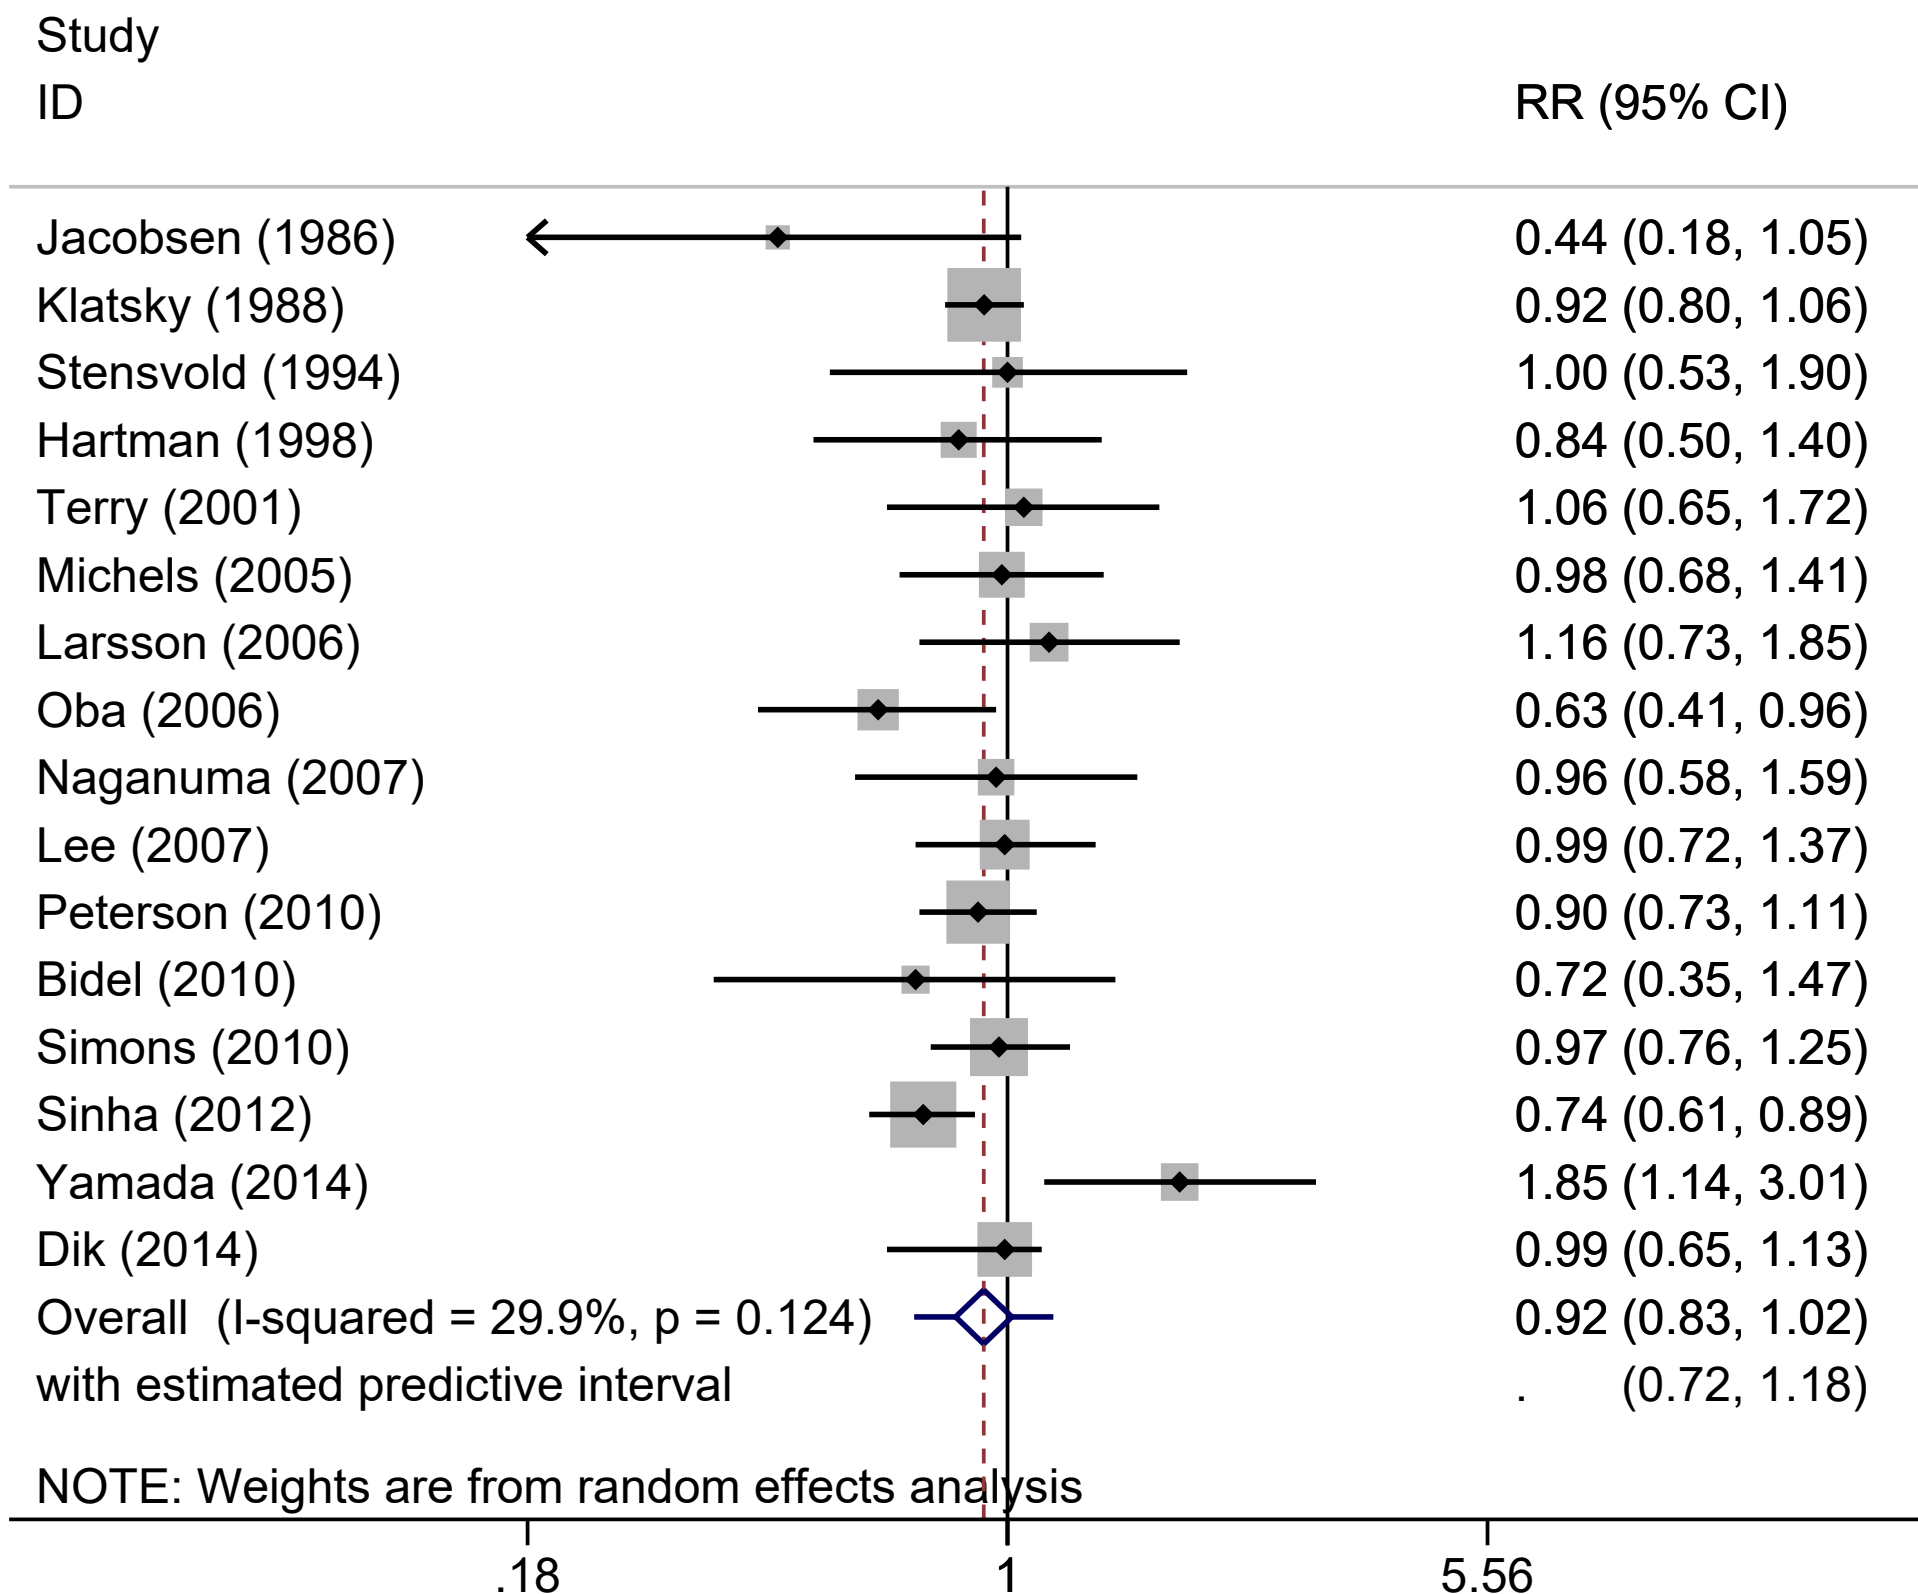



# Supplementary figure 41, Colon cancer, Per 1 cup, only cohort studies

Study

ID

RR (95% CI)

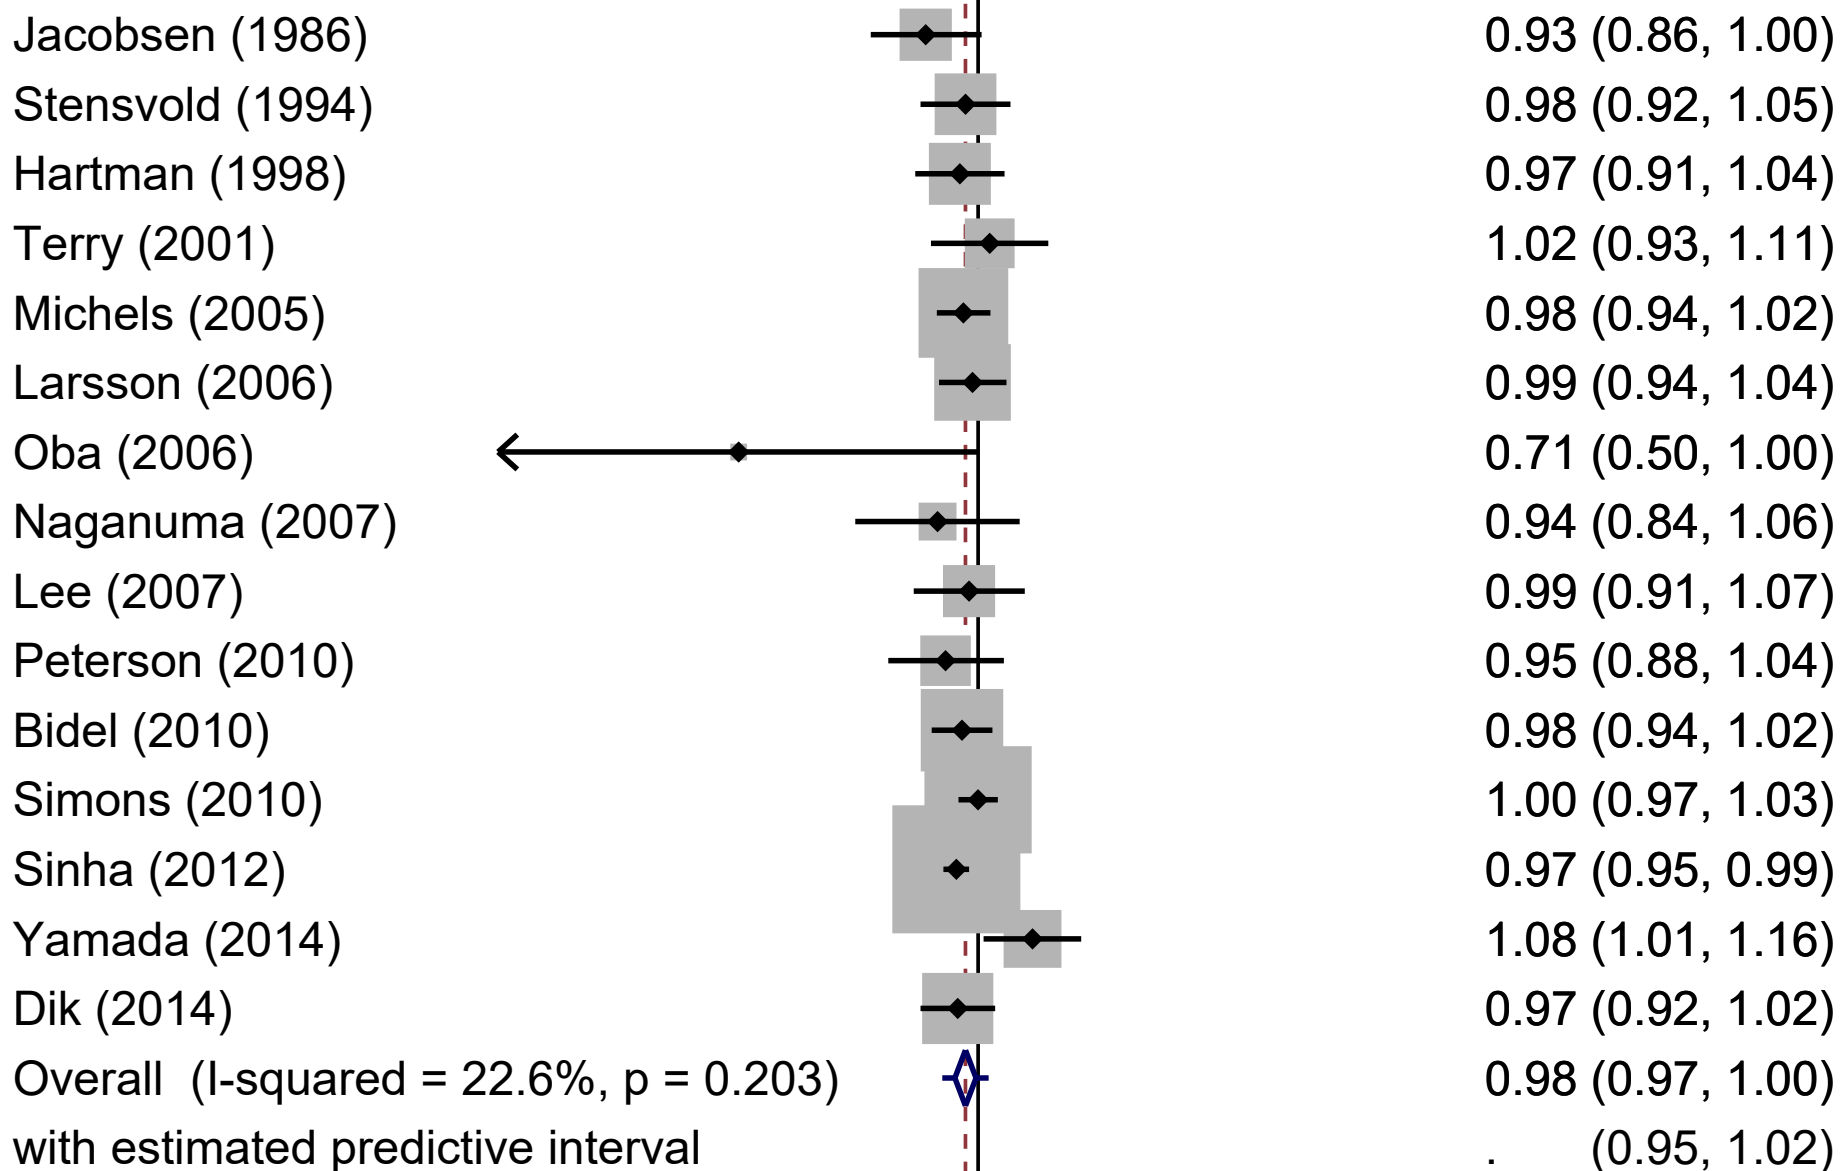

NOTE: Weights are from random effects analysis

.499

1

2

# Supplementary figure 42, Colorectal cancer, H/L, only cohort studies

Study  
ID

RR (95% CI)

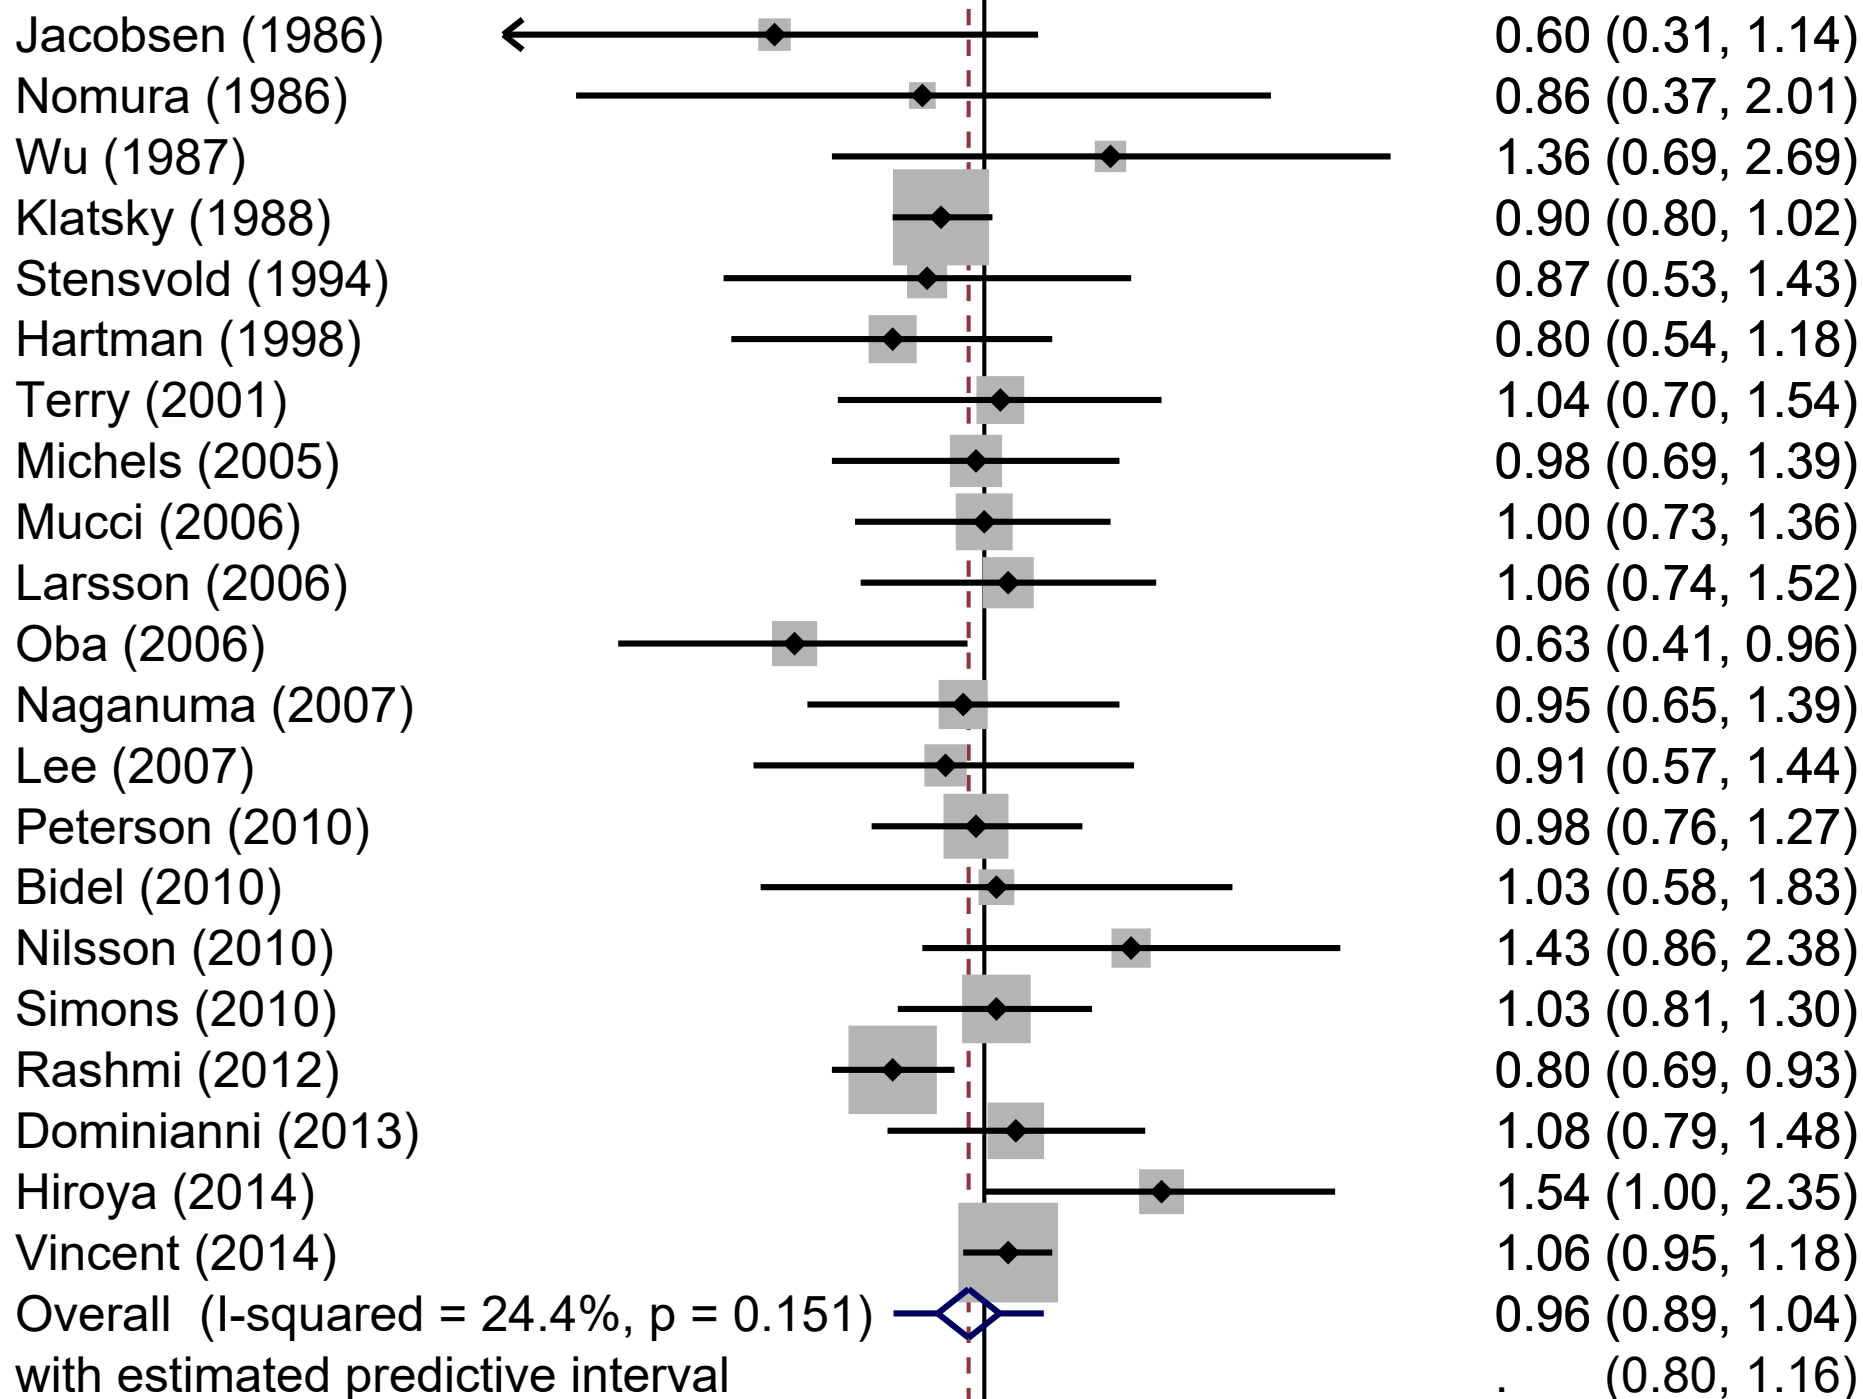

NOTE: Weights are from random effects analysis

.31

1

3.23

# Supplementary figure 43, Colorectal cancer, Per 1 cup, only cohort studies

Study

ID

RR (95% CI)

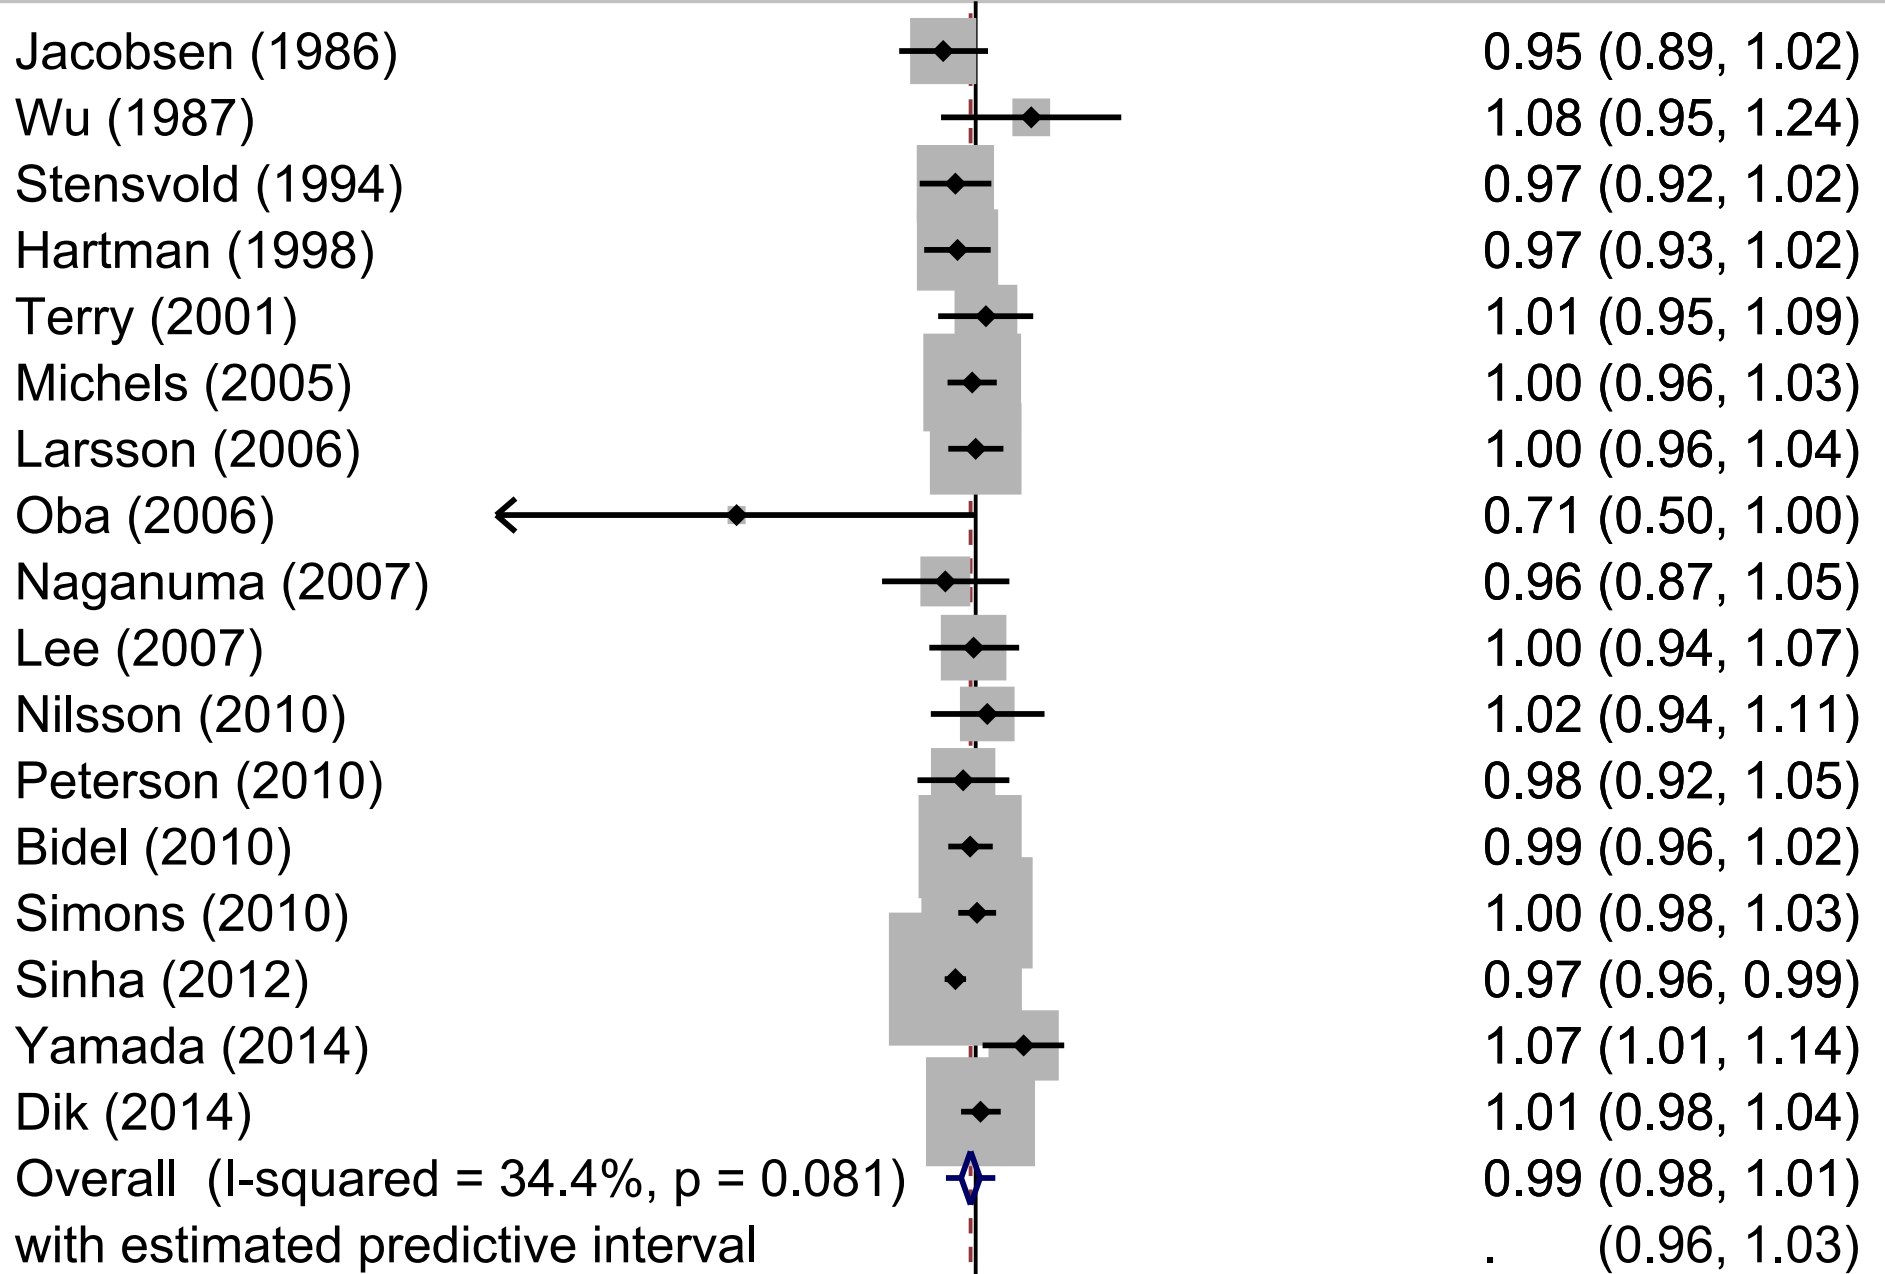

NOTE: Weights are from random effects analysis

.499

1

2

# Supplementary figure 44, Endometrial cancer, H/L, only cohort studies

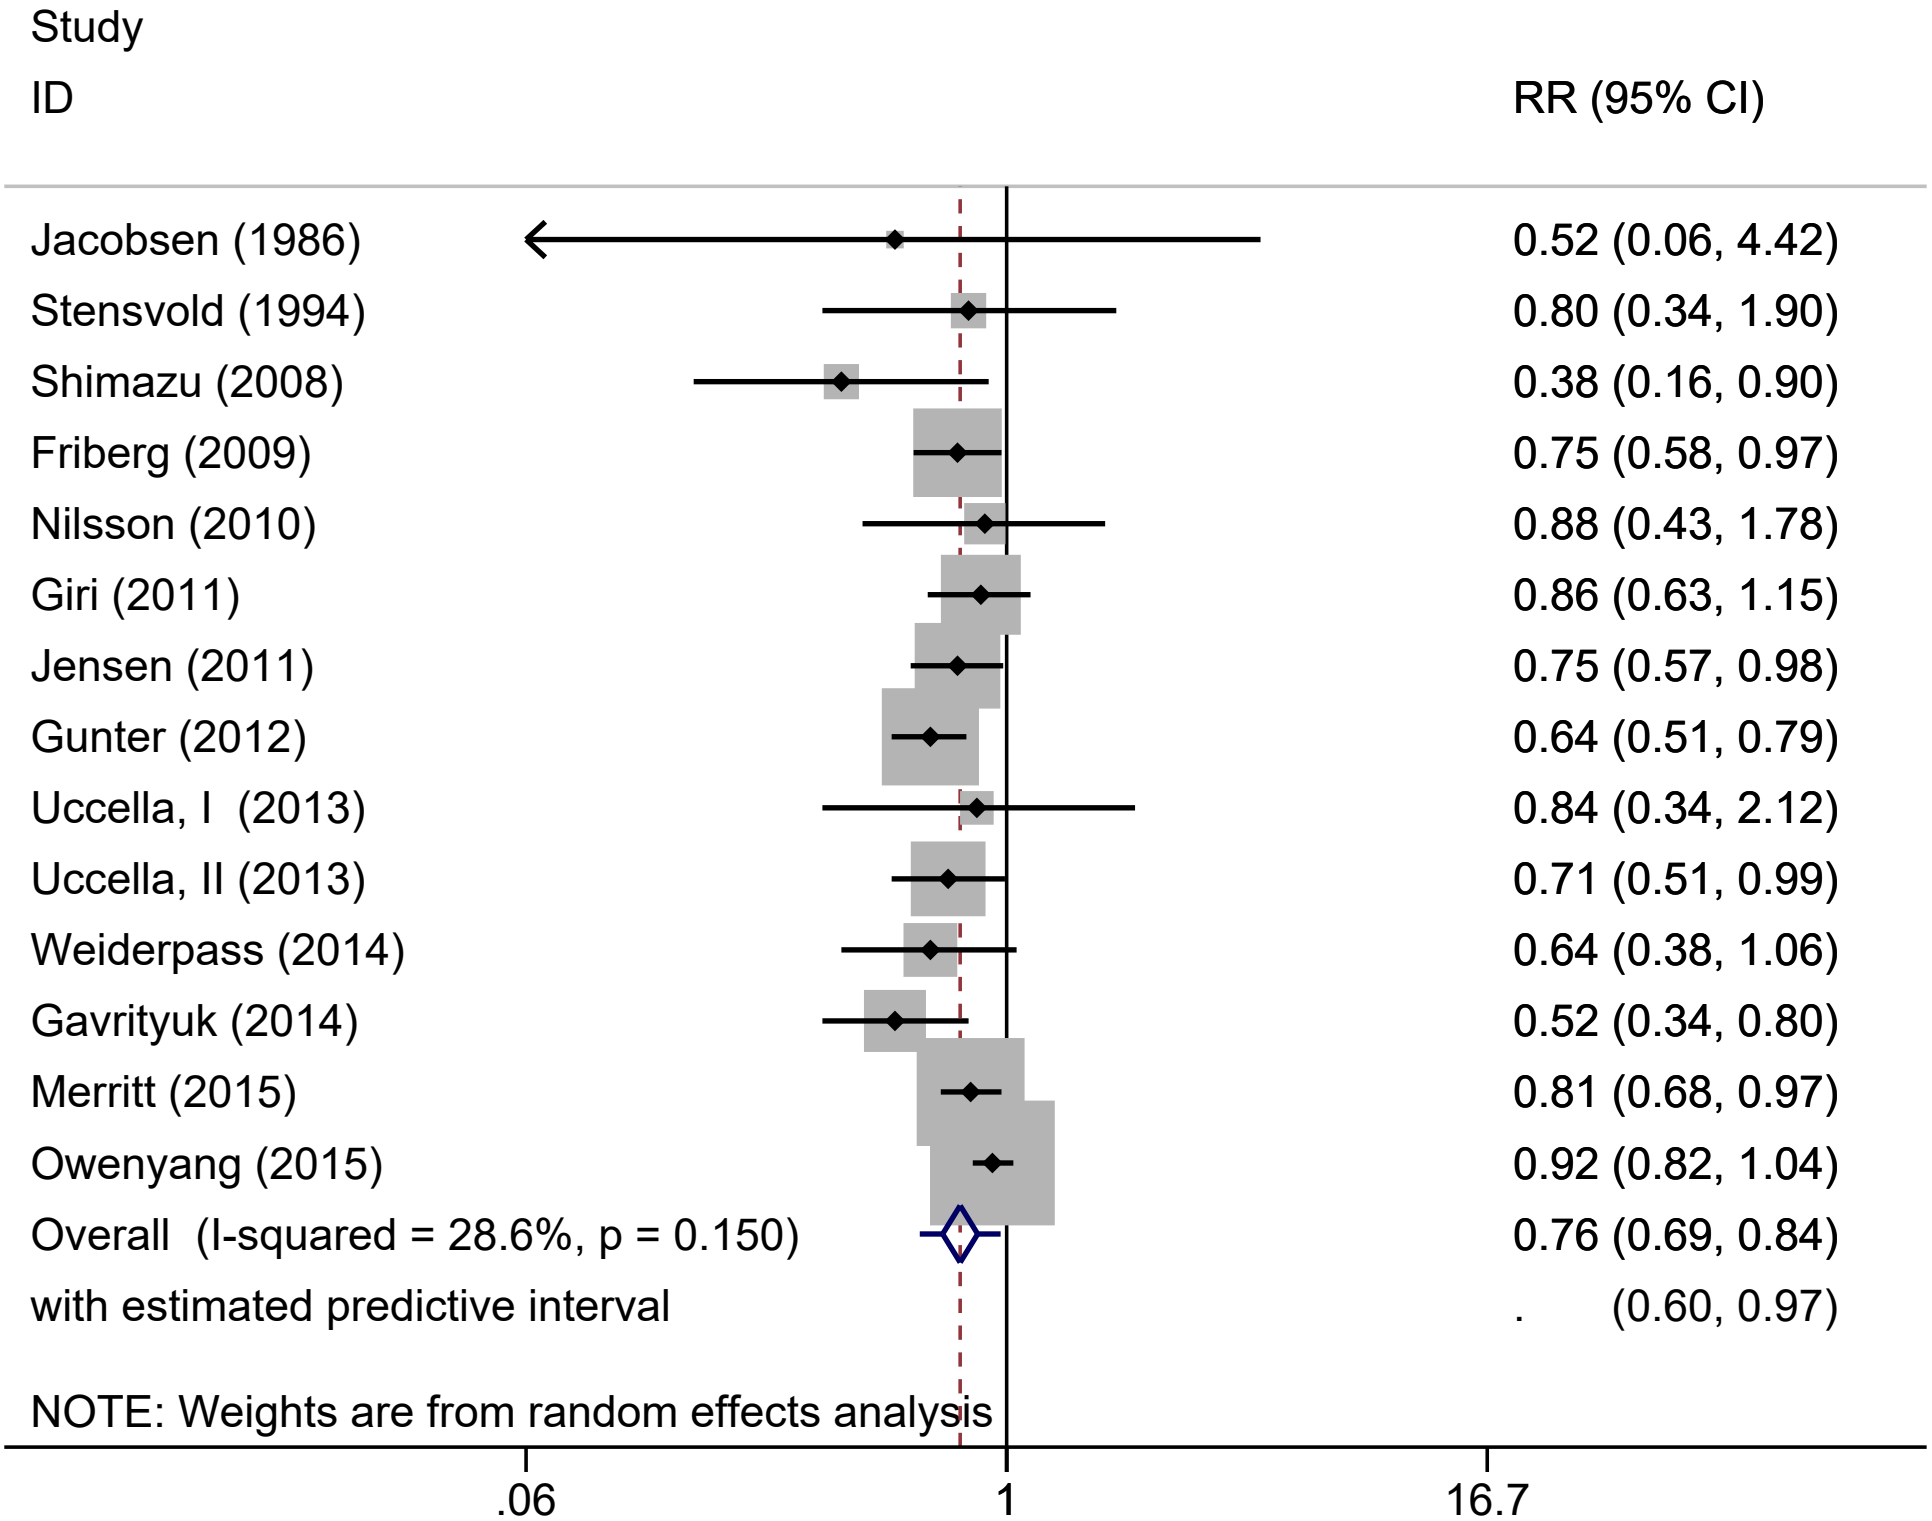

# Supplementary figure 45, Endometrial cancer, Per 1 cup, only cohort studies

Study

ID

RR (95% CI)

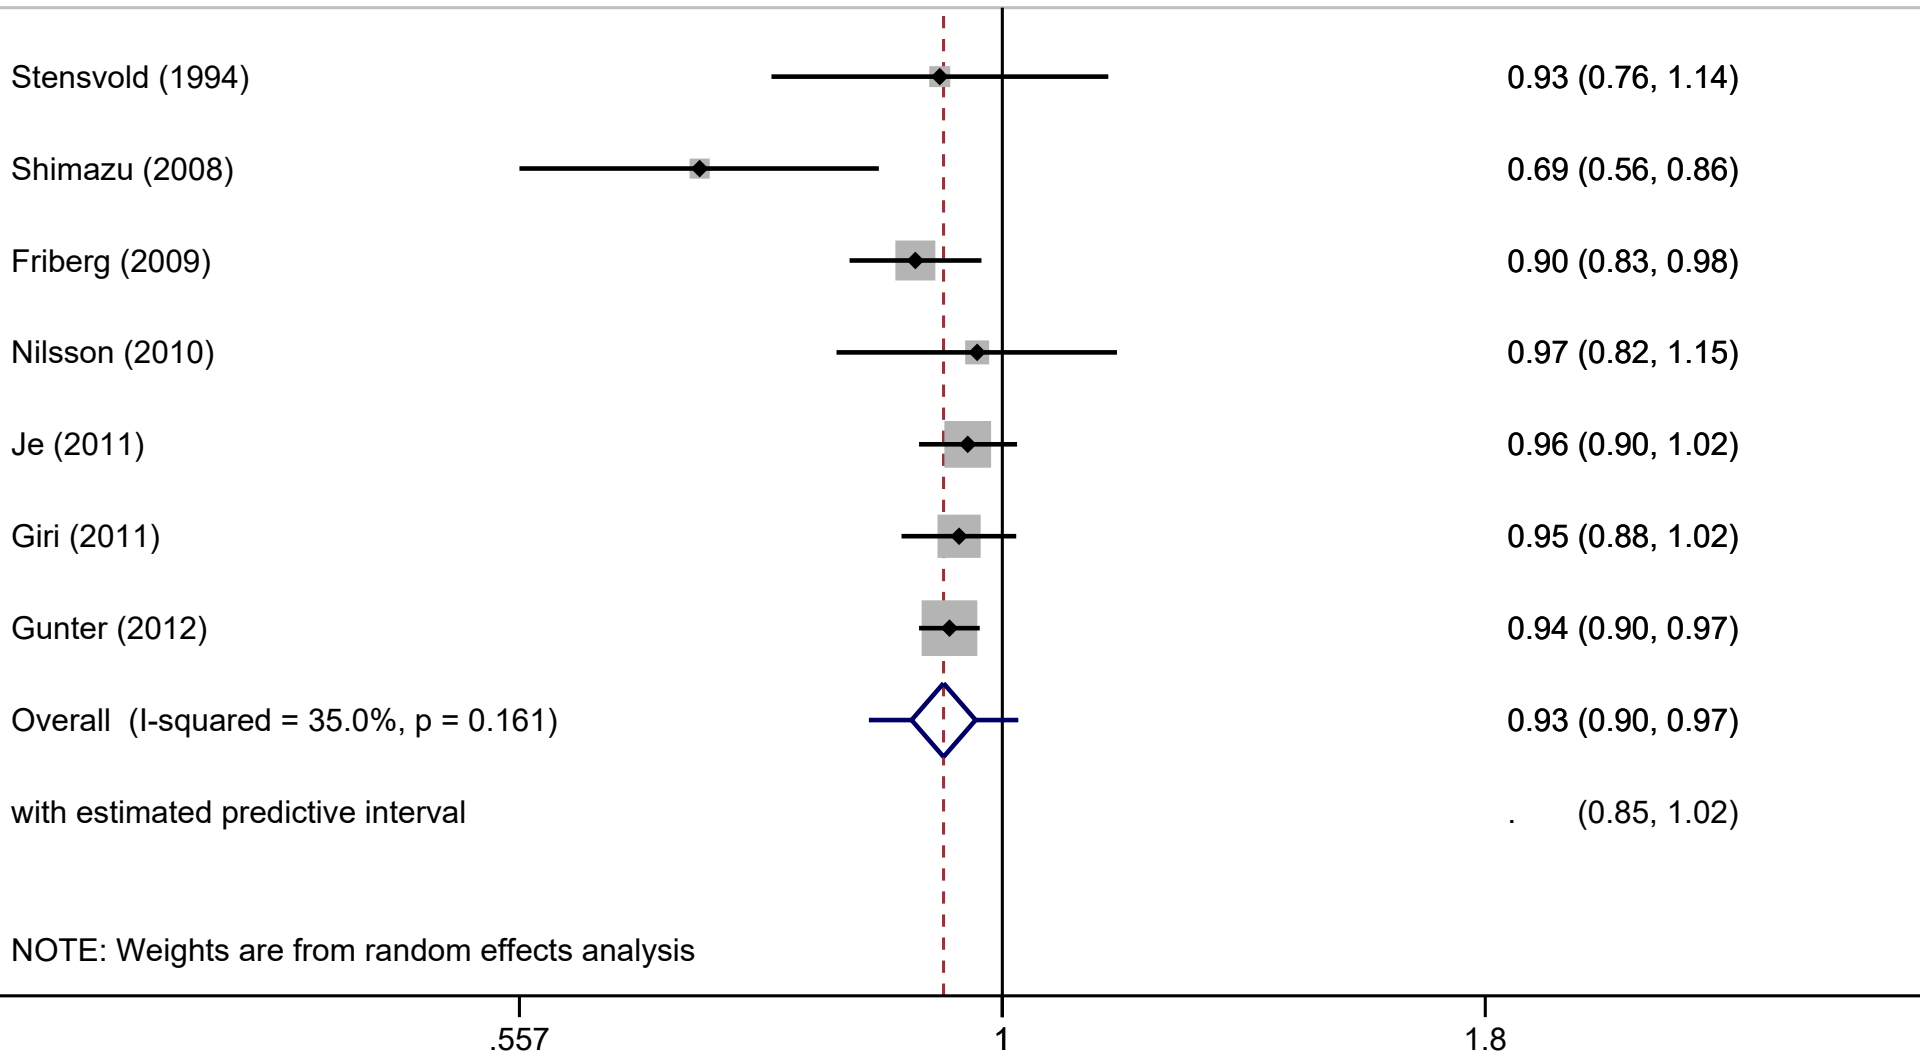

# Supplementary figure 46, Esophageal cancer, H/L, only cohort studies

Study

ID

RR (95% CI)

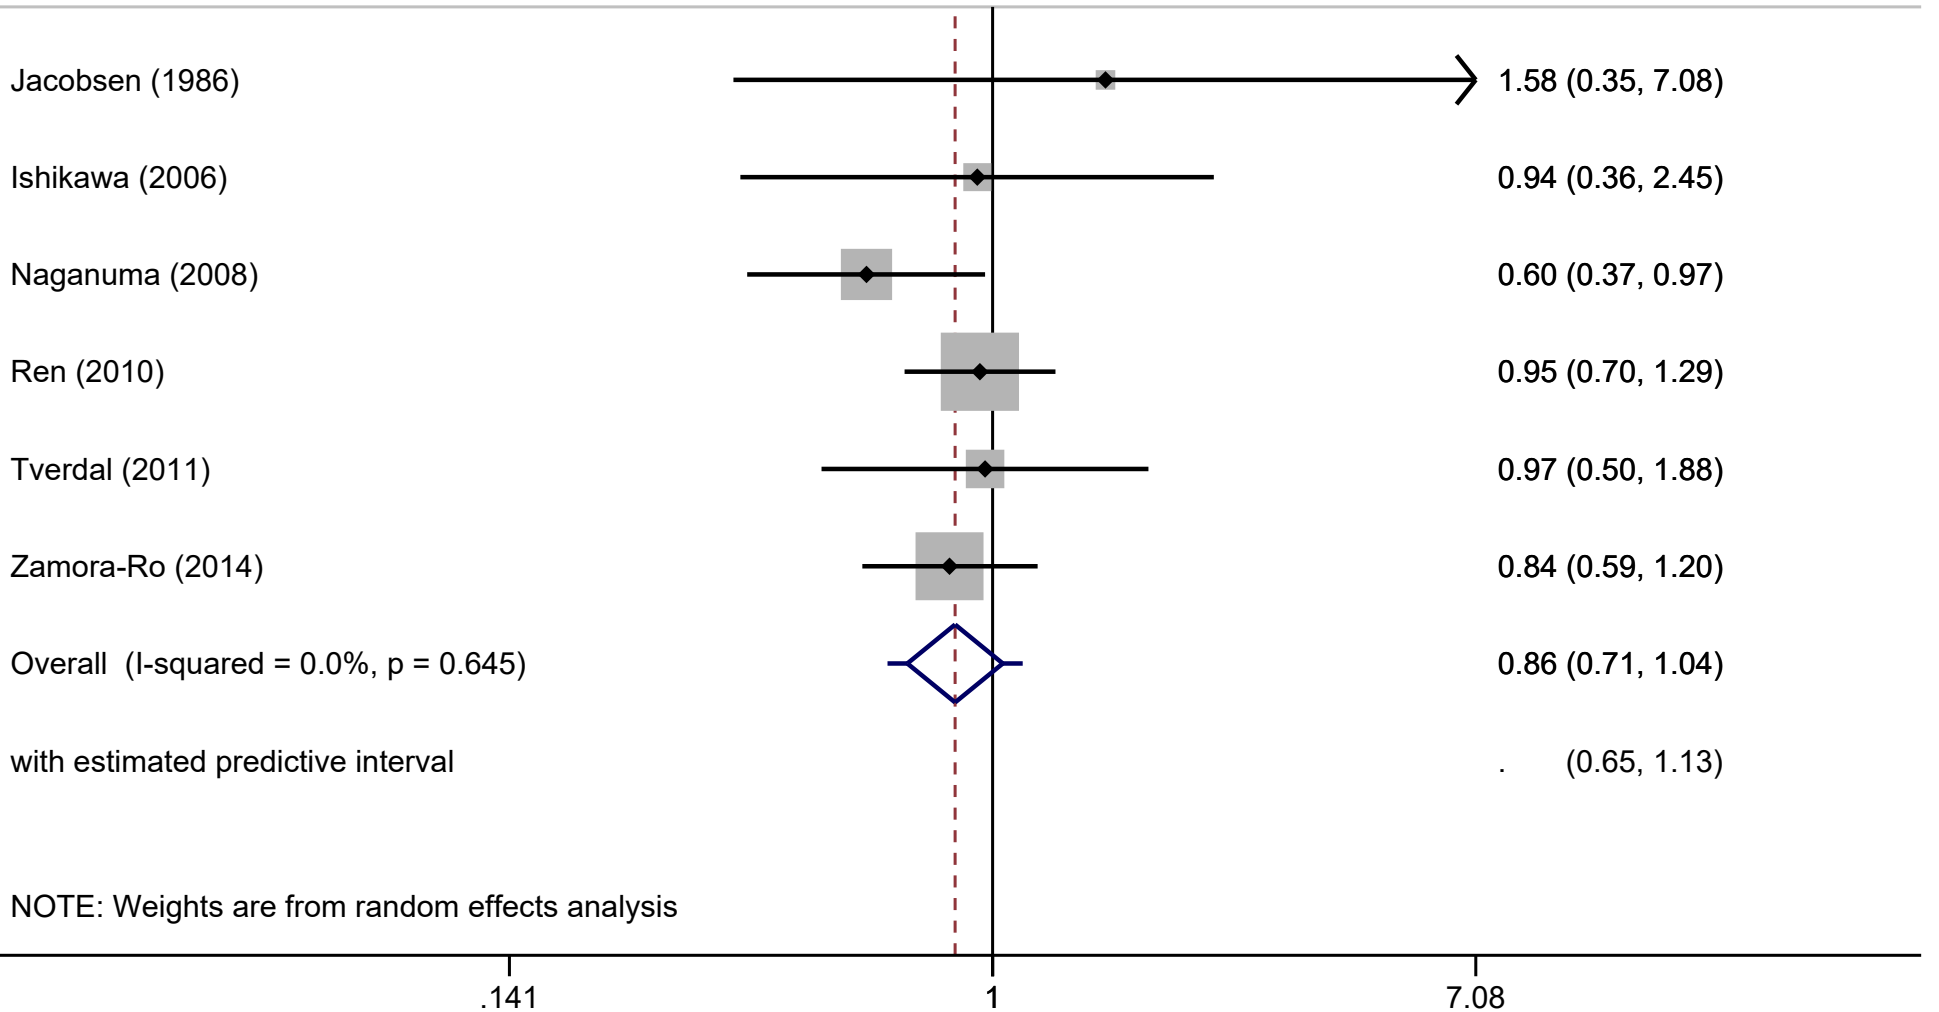

# Supplementary figure 47, Gastric cancer, H/L, only cohort studies

Study

ID RR (95% CI)

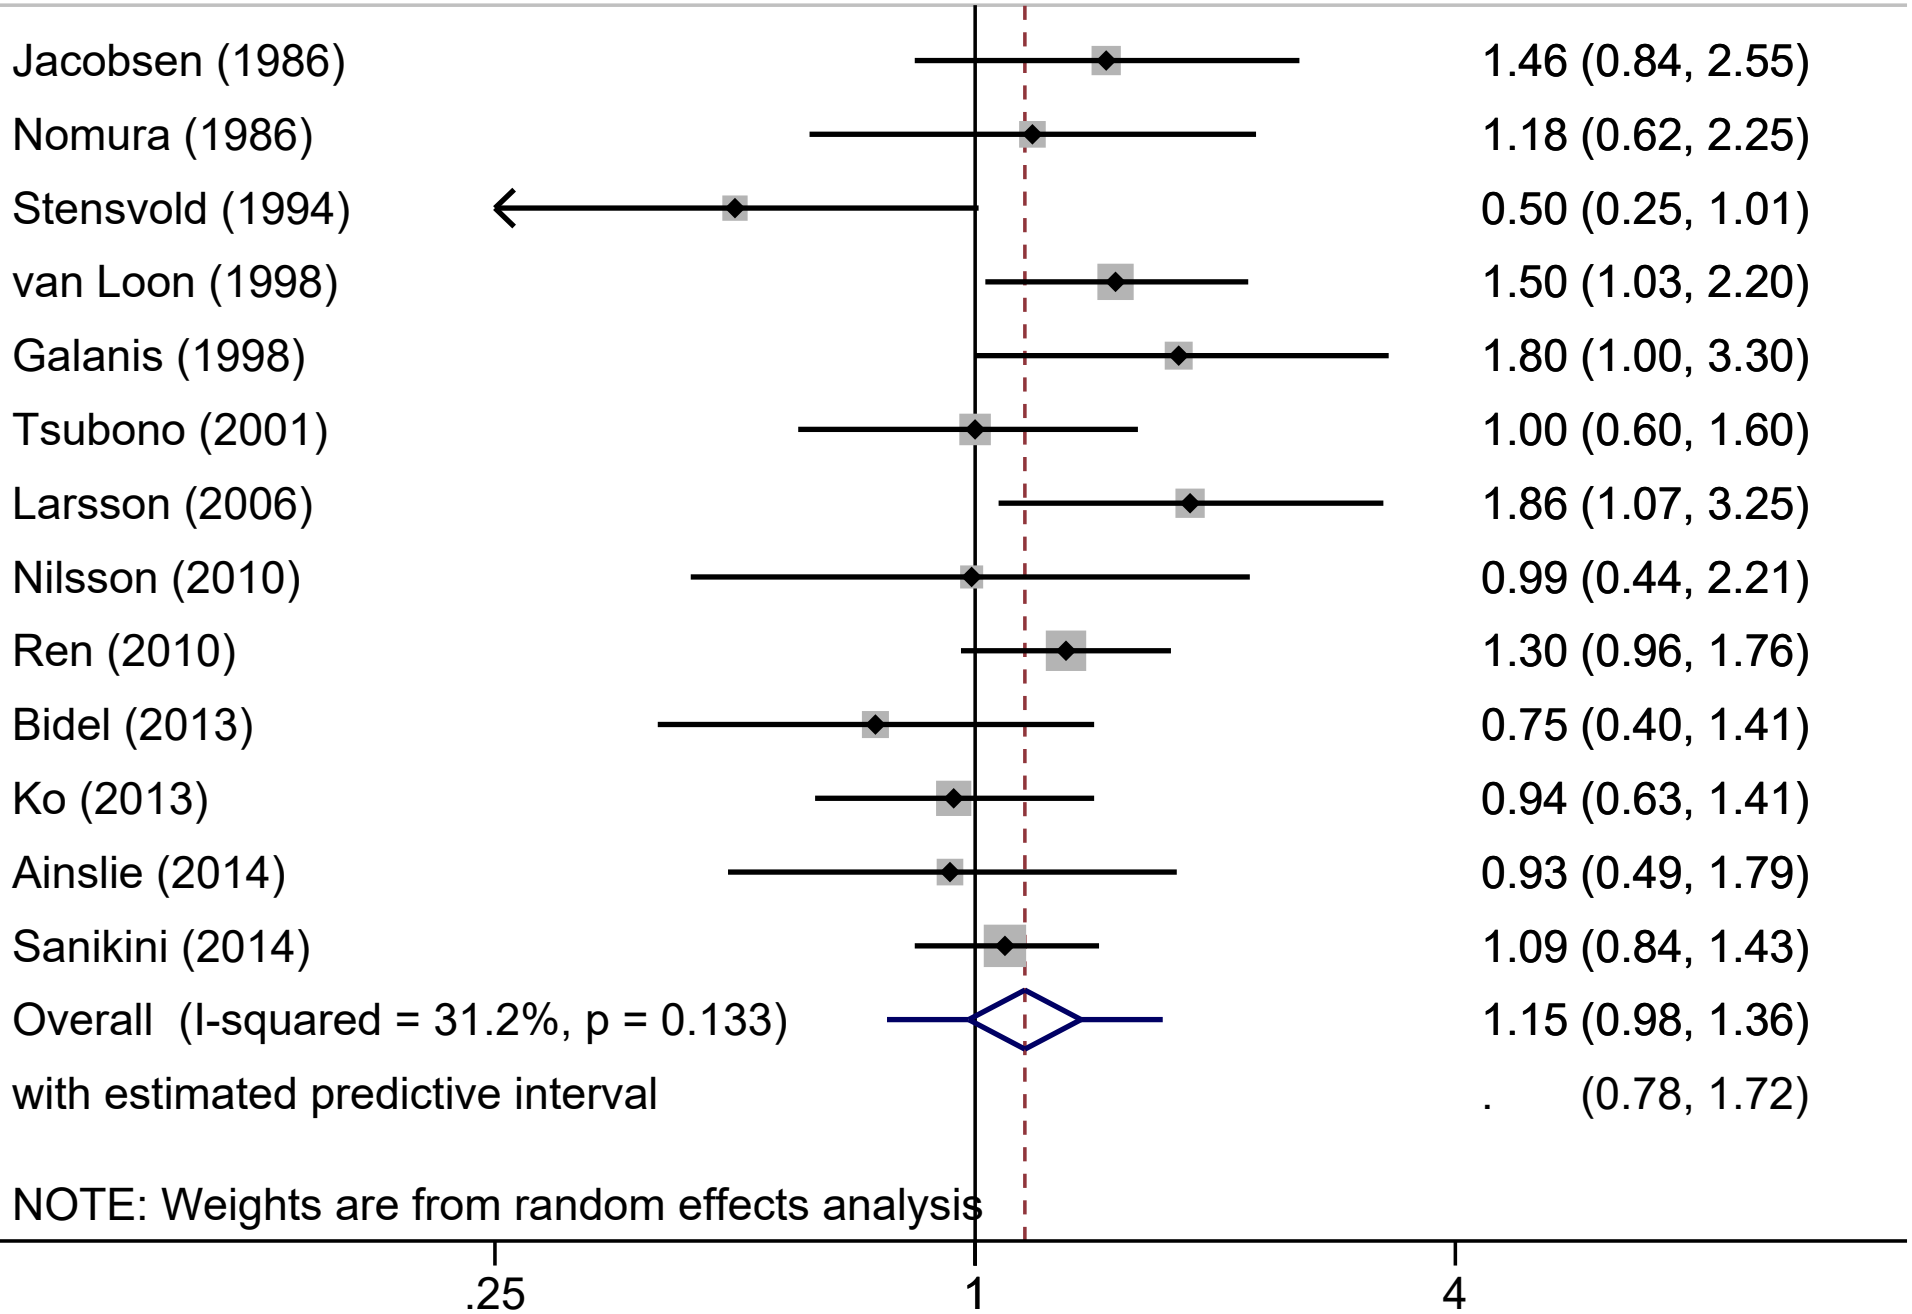

# Supplementary figure 48, Gastric cancer, Per 1 cup, only cohort studies

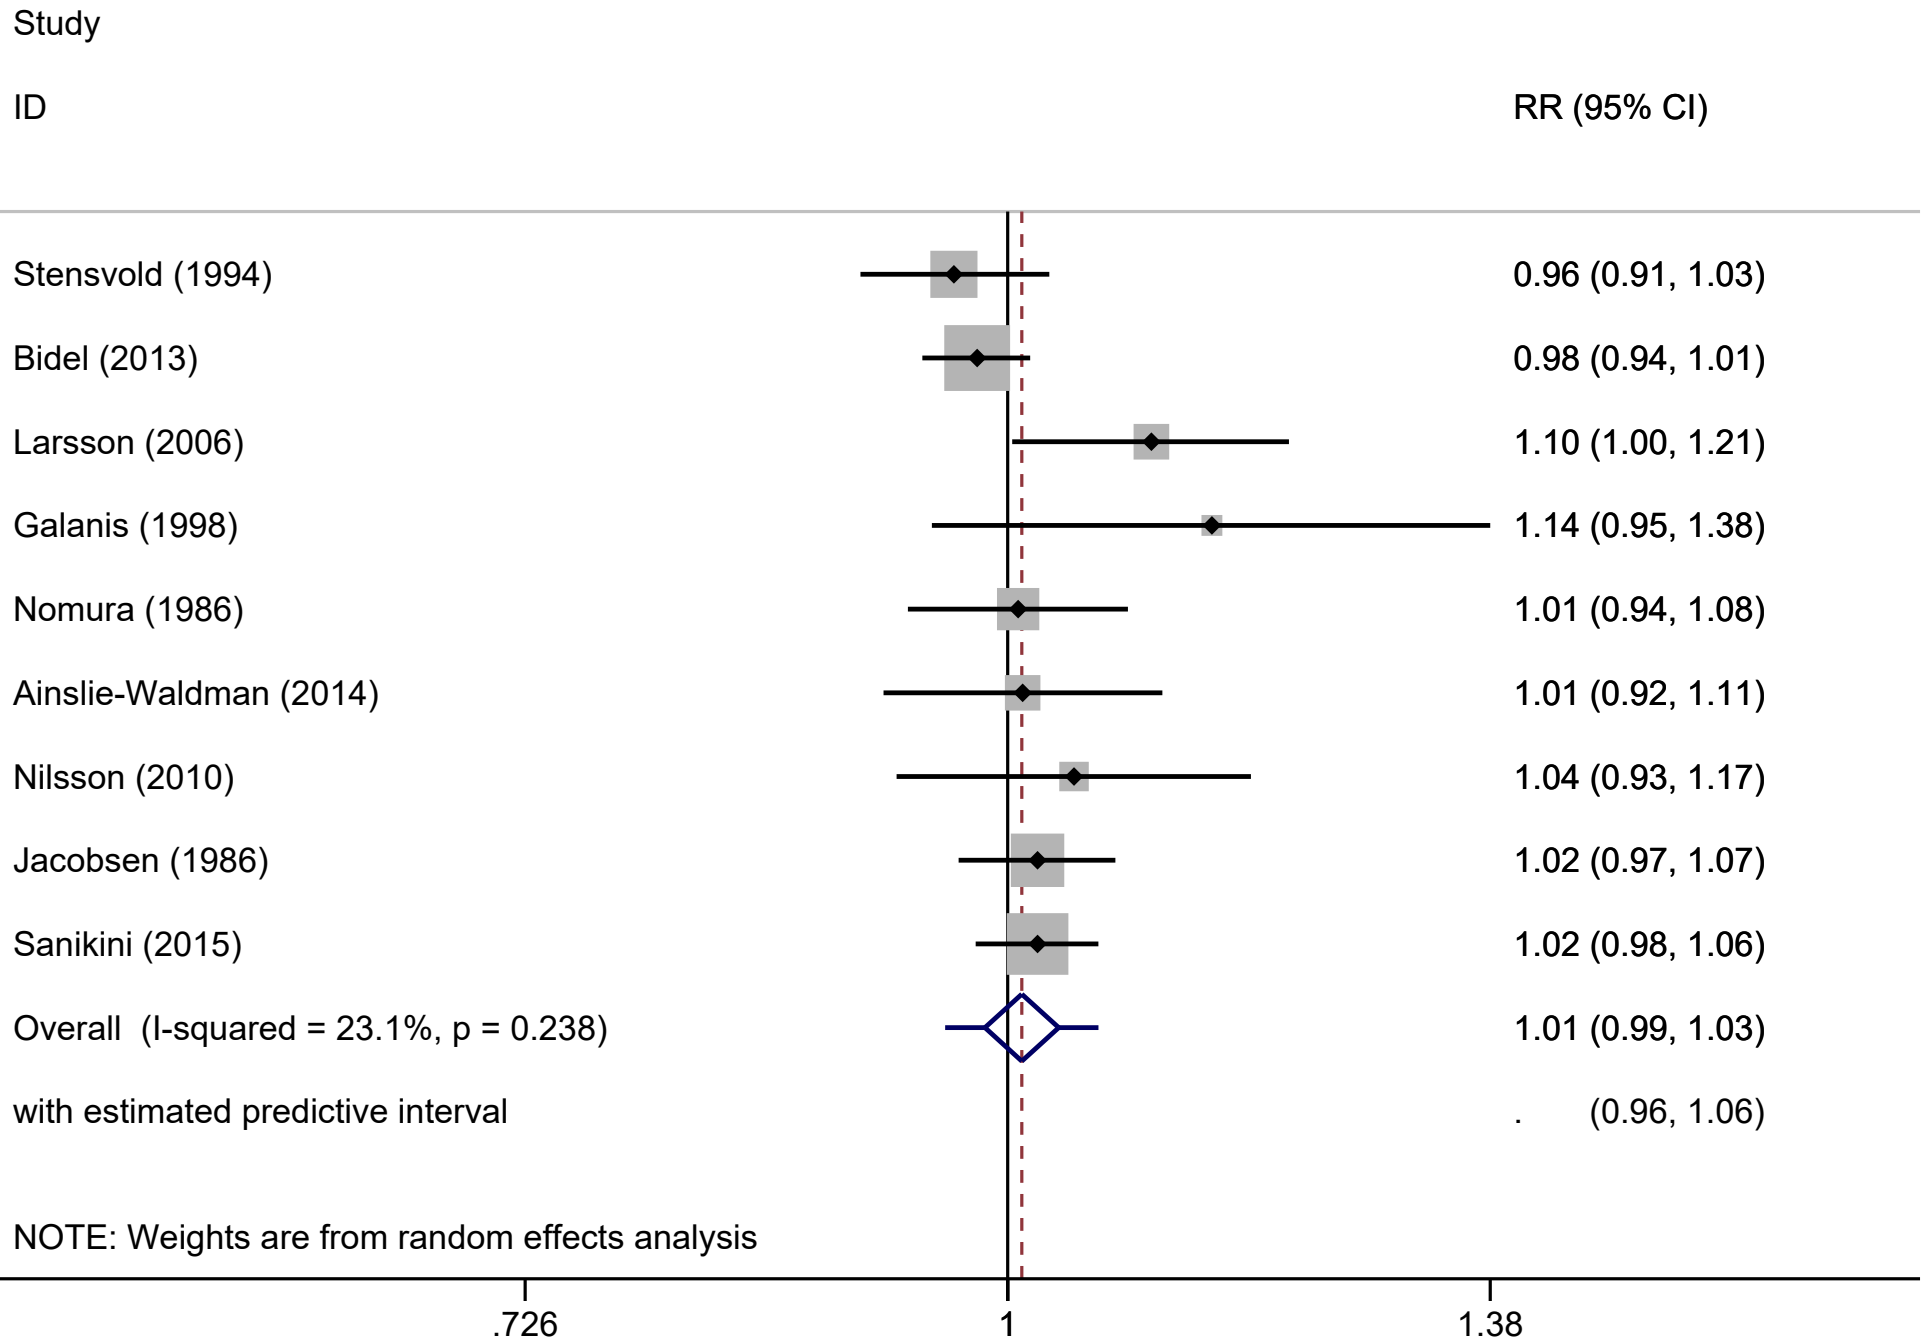



Supplementary figure 49, Glioma, H/L, only cohort studies

Study

ID

RR (95% CI)

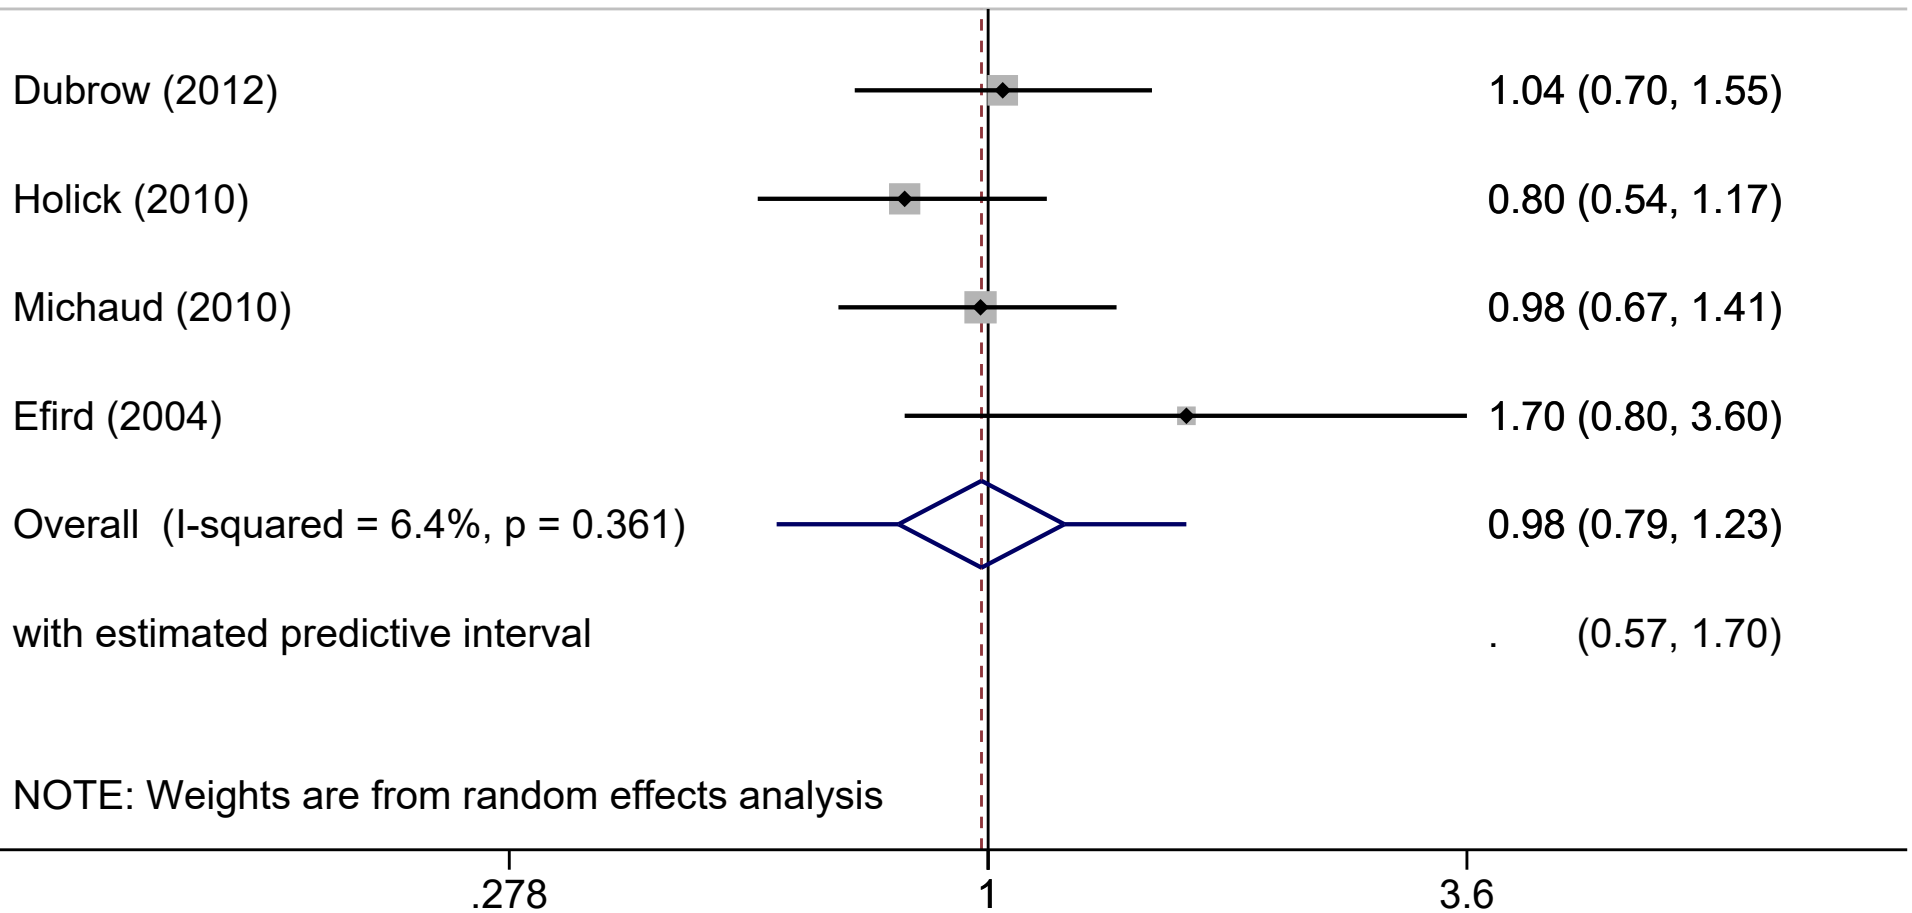

# Supplementary figure 50, Kidney cancer, H/L, only cohort studies

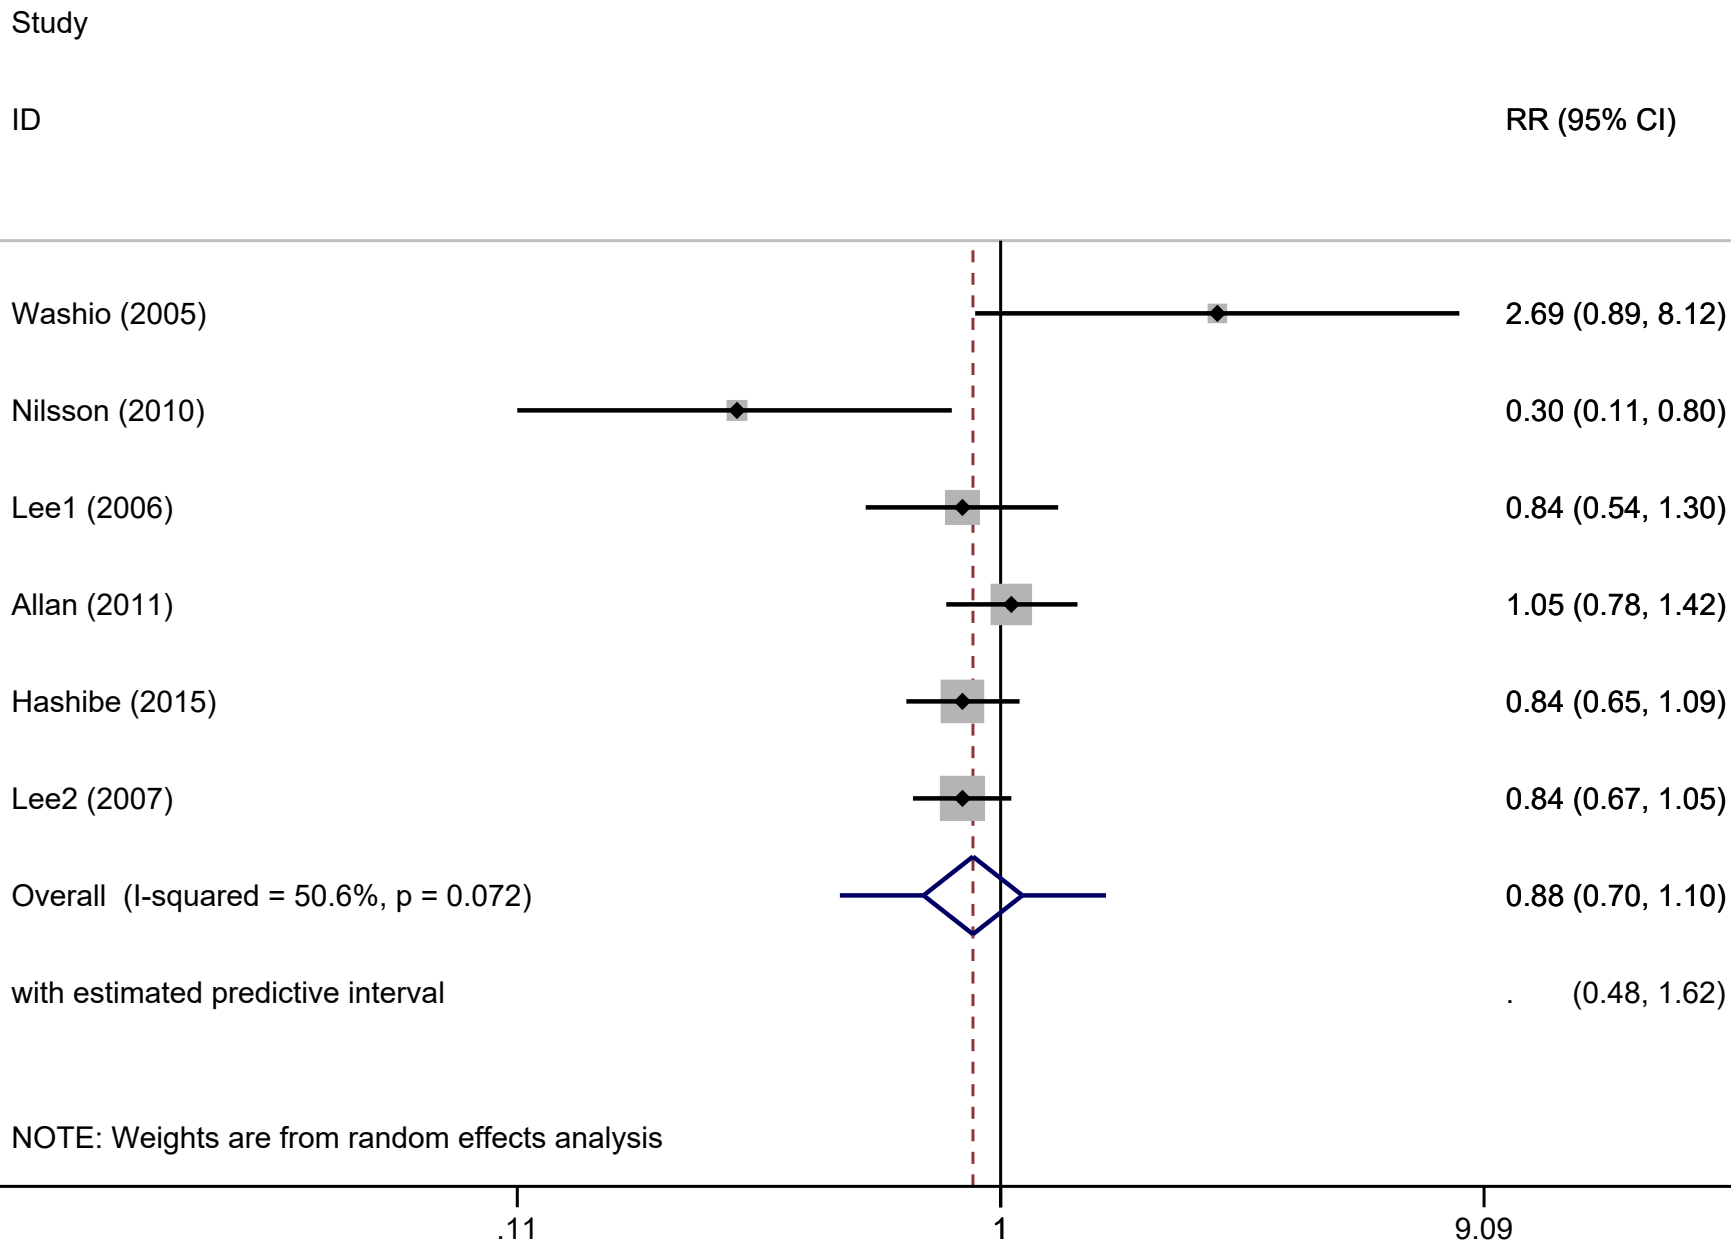

# Supplementary figure 51, Laryngeal cancer, H/L, only cohort studies

Study

ID

RR (95% CI)

Ren (2010)

Overall (I-squared = 100.0%, p = .)

NOTE: Weights are from random effects analysis

.694

1

1.44

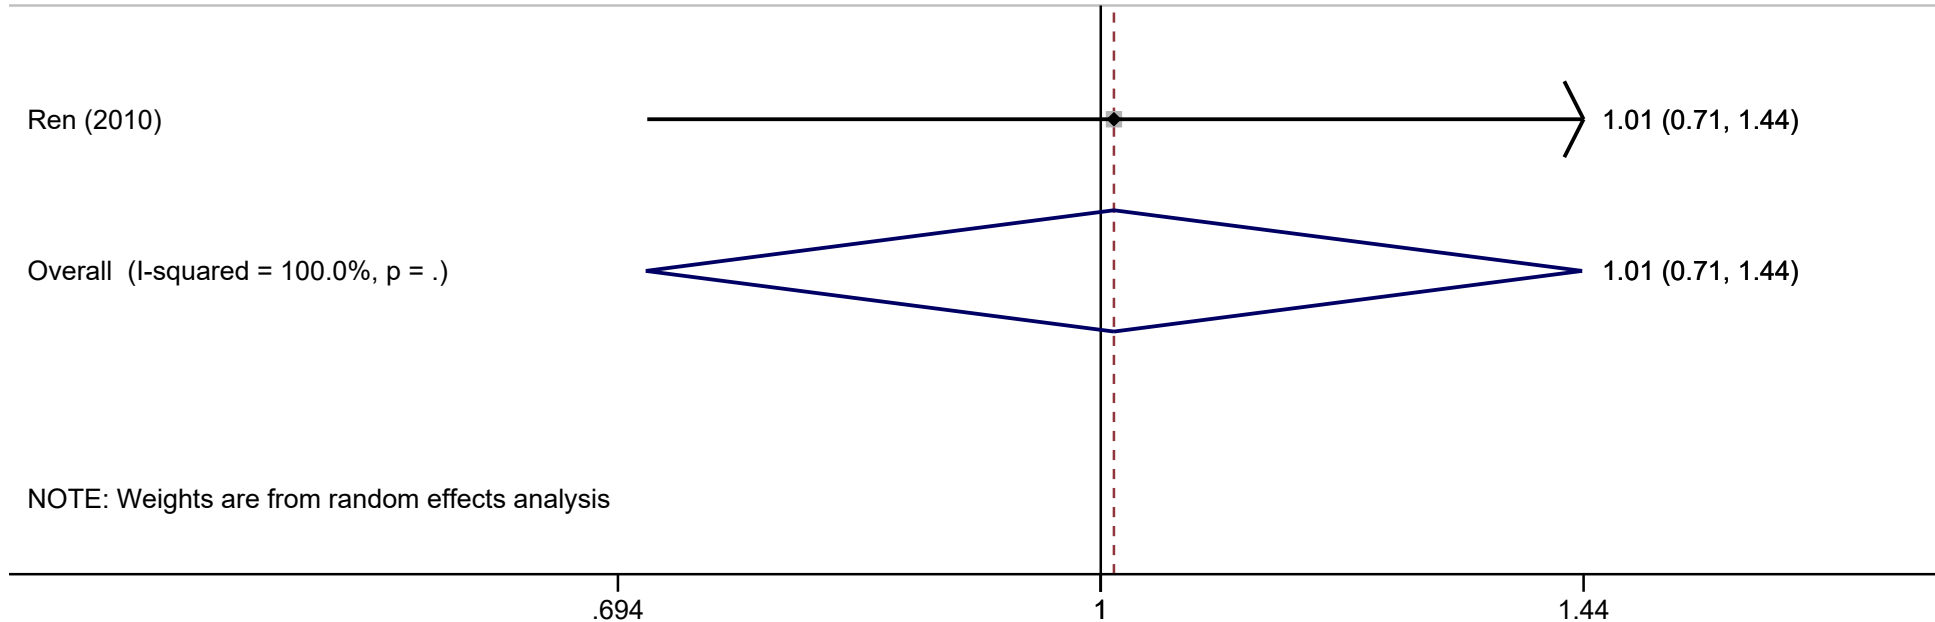

Supplementary figure 52, Leukemia, H/L, only cohort studies

Study

ID

RR (95% CI)

Ma (2010)

0.62 (0.44, 0.88)

Jacobsen (1986)

1.62 (0.35, 6.38)

Overall (I-squared = 37.2%, p = 0.207)

0.77 (0.35, 1.67)

NOTE: Weights are from random effects analysis

.157

1

6.38

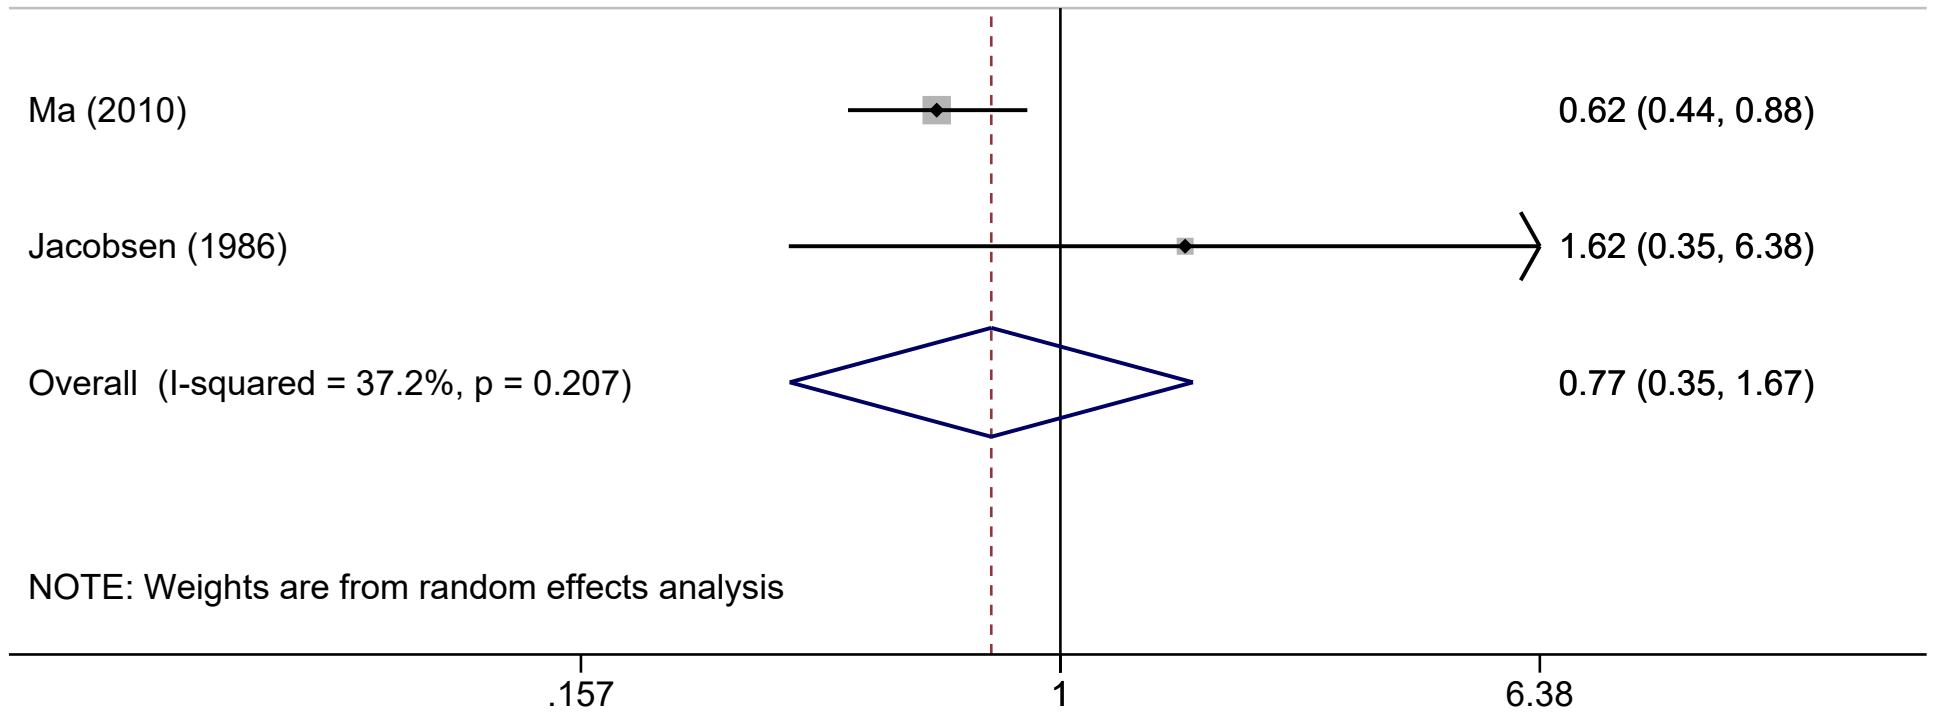

# Supplementary figure 53, Liver cancer, H/L, only cohort studies

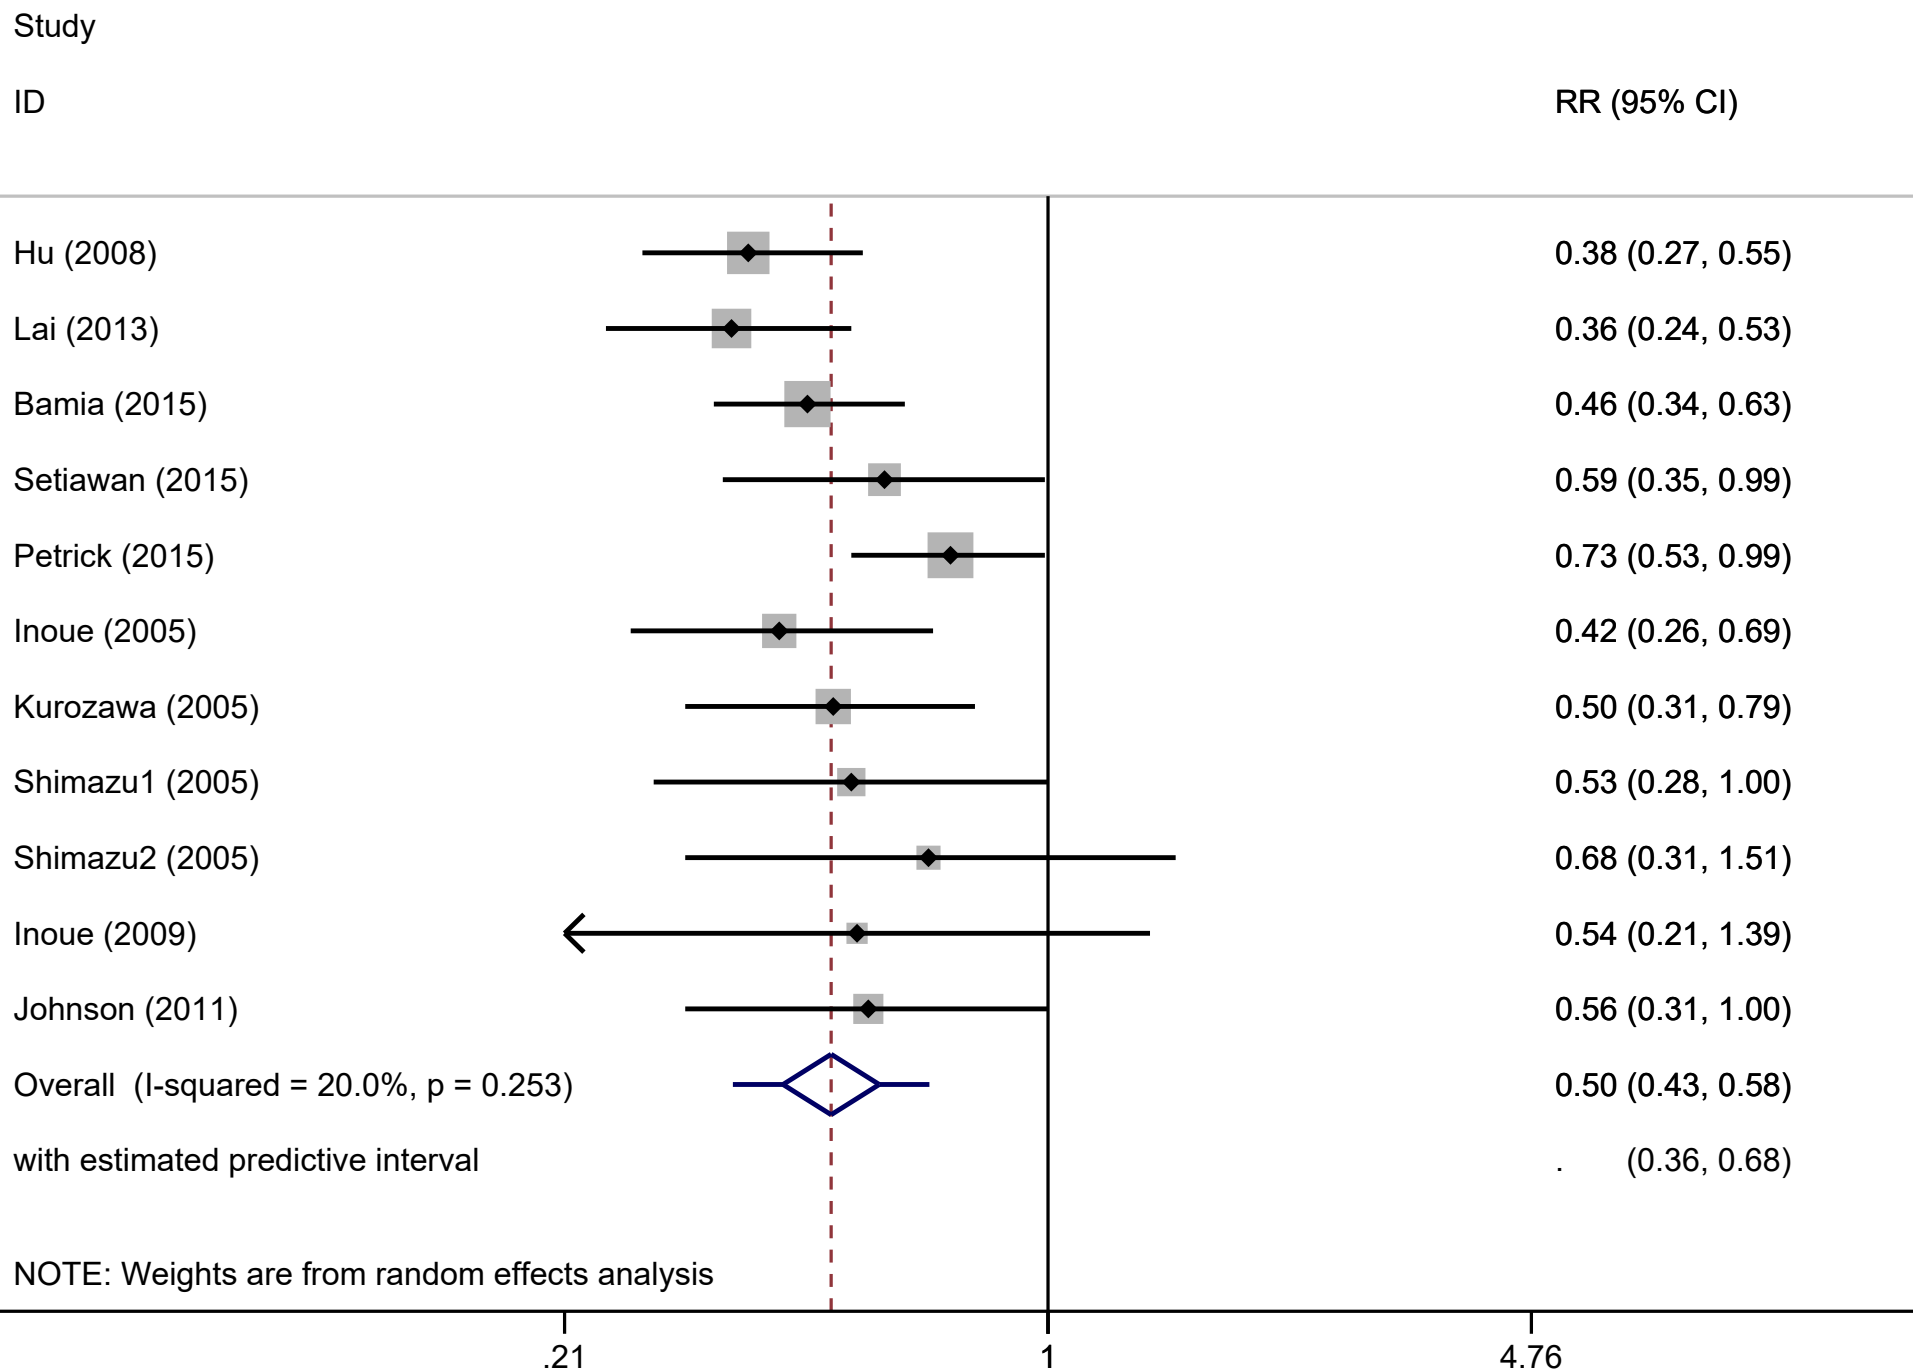

# Supplementary figure 54, Liver cancer, Per 1 cup, only cohort studies

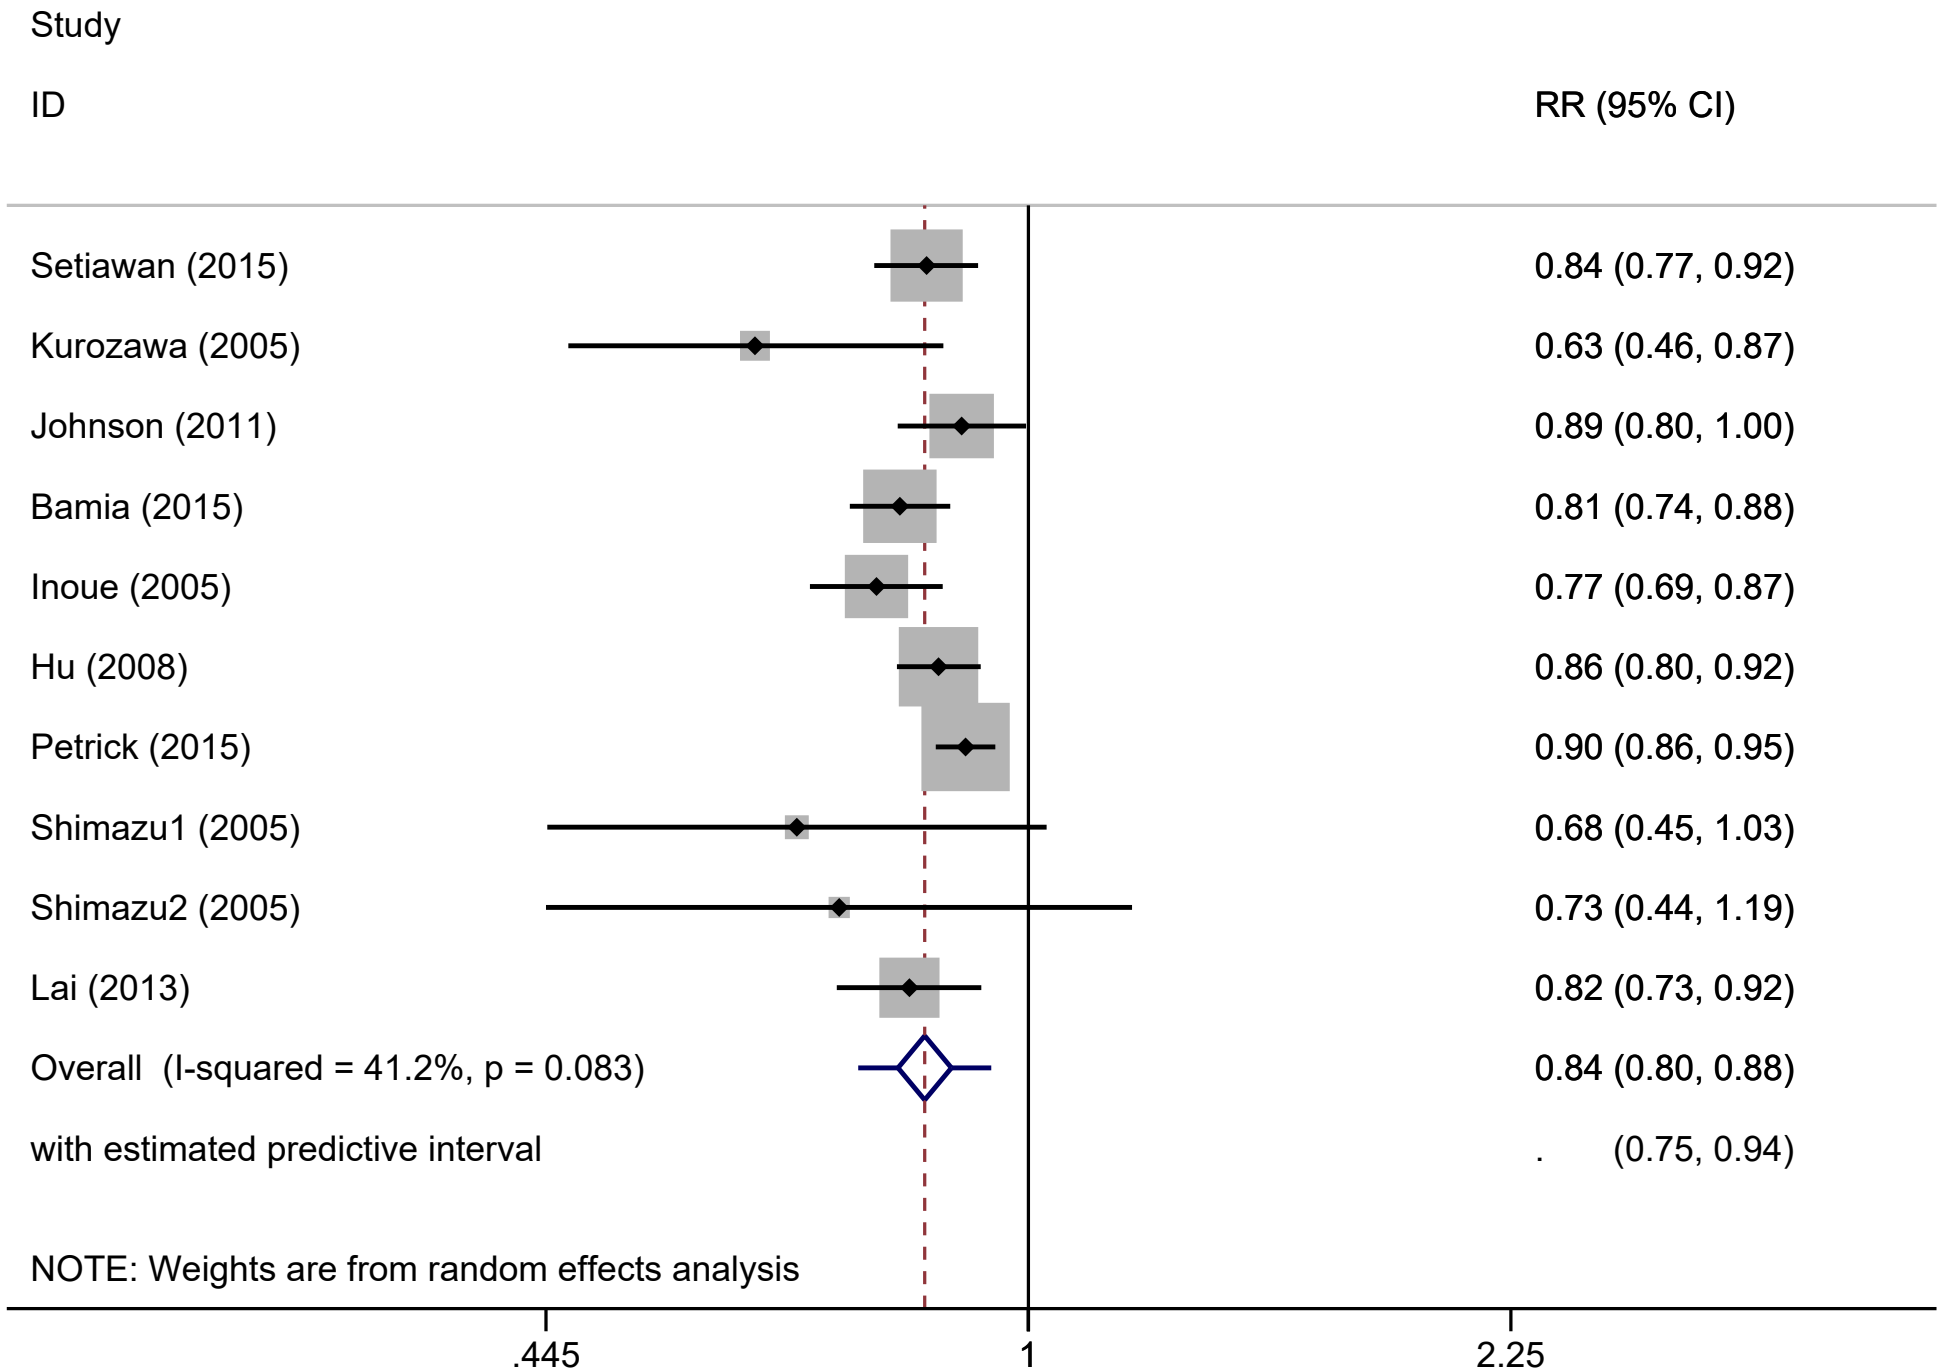

# Supplementary figure 55, Lung cancer, H/L, only cohort studies

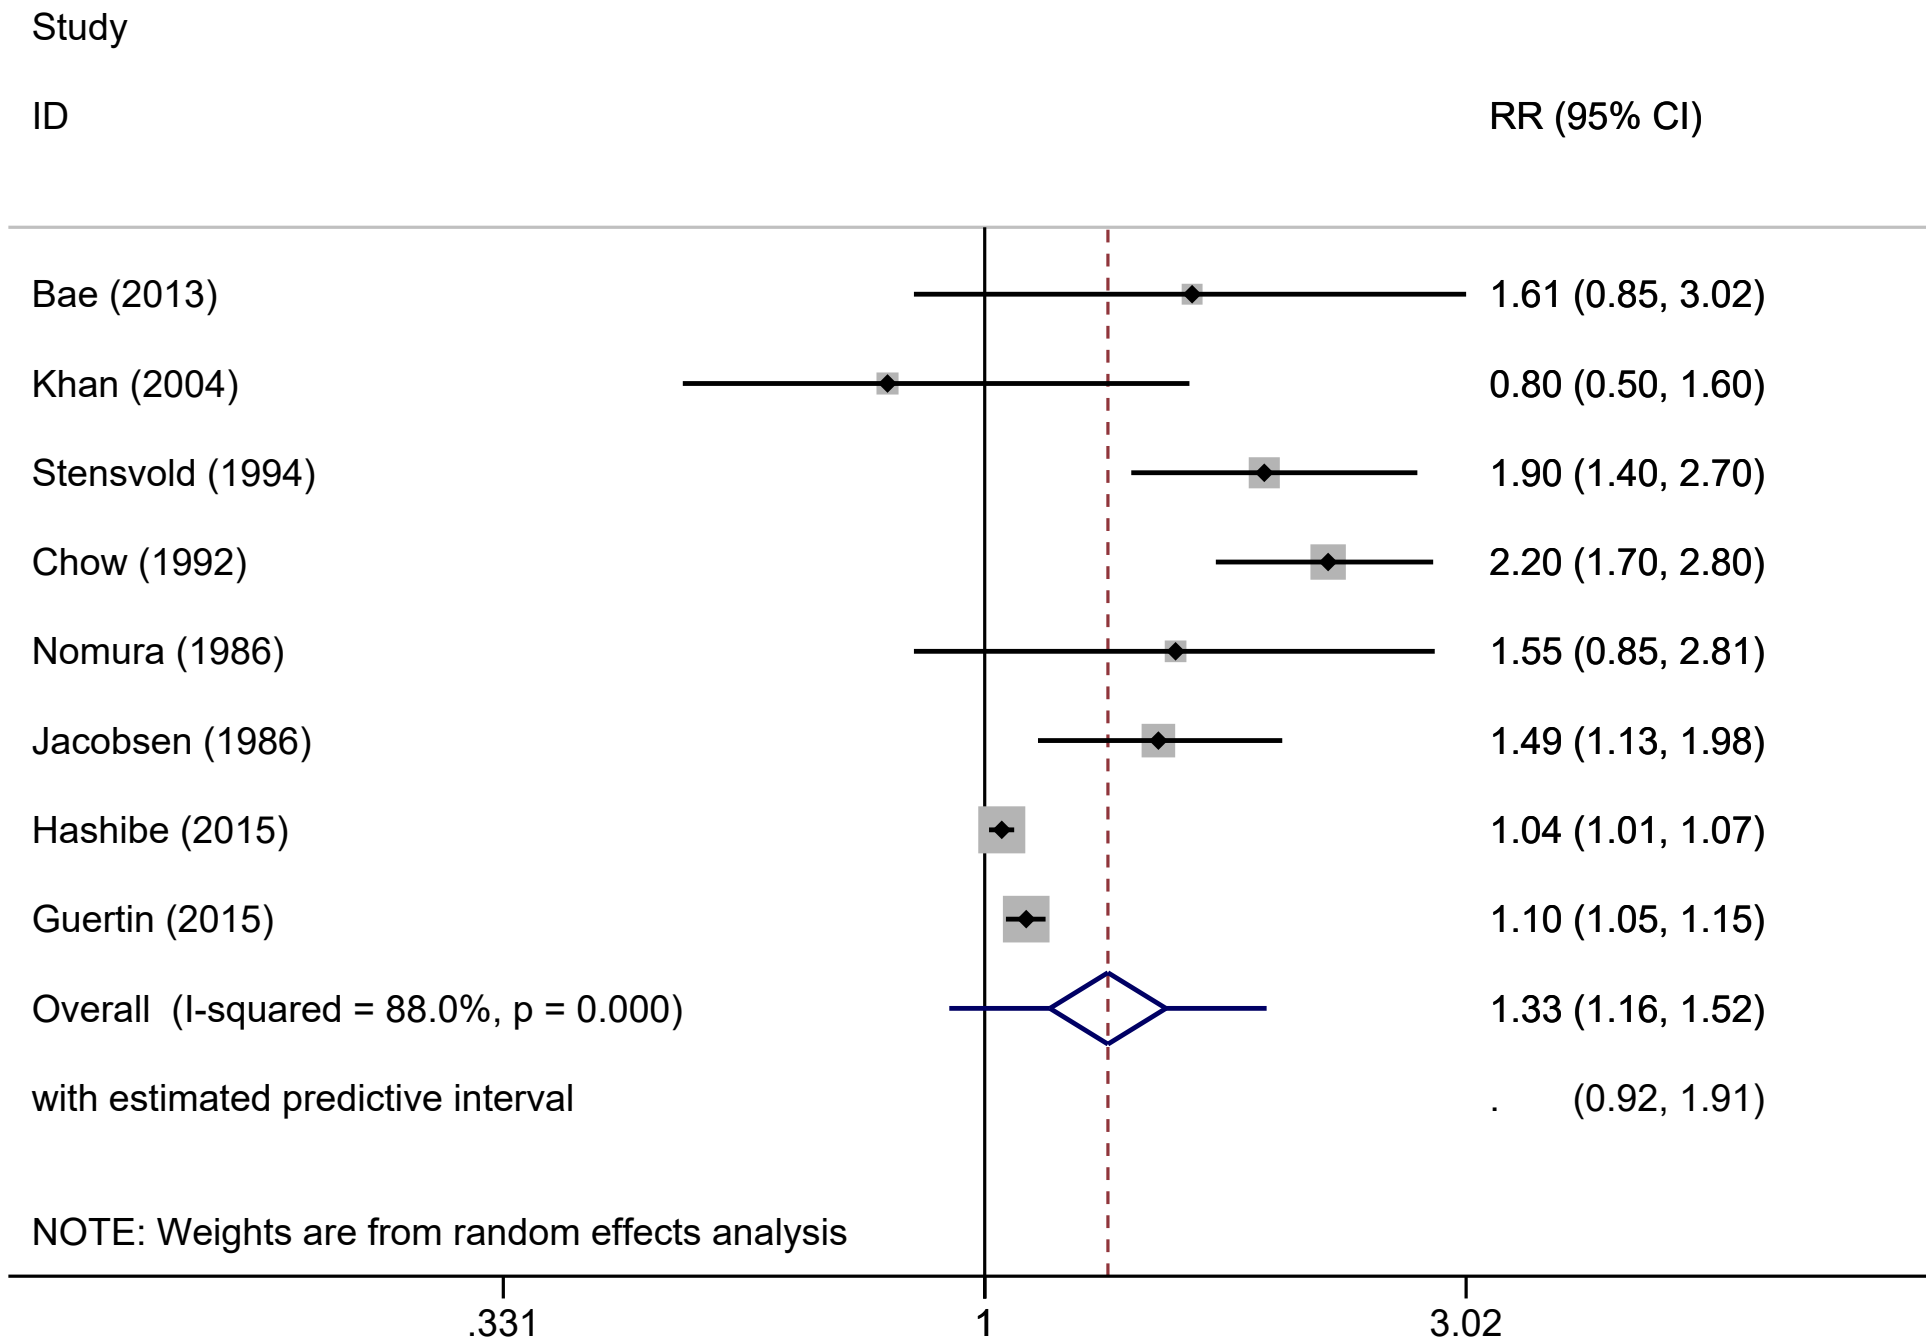

Supplementary figure 56, Lung cancer, Per 1 cup, only cohort studies

Study

ID

RR (95% CI)

Nomura (1986)

1.07 (0.96, 1.19)

Stensvold (1994)

1.23 (1.09, 1.39)

Overall (I-squared = 62.4%, p = 0.103)

1.14 (1.00, 1.31)

NOTE: Weights are from random effects analysis

.719

1

1.39

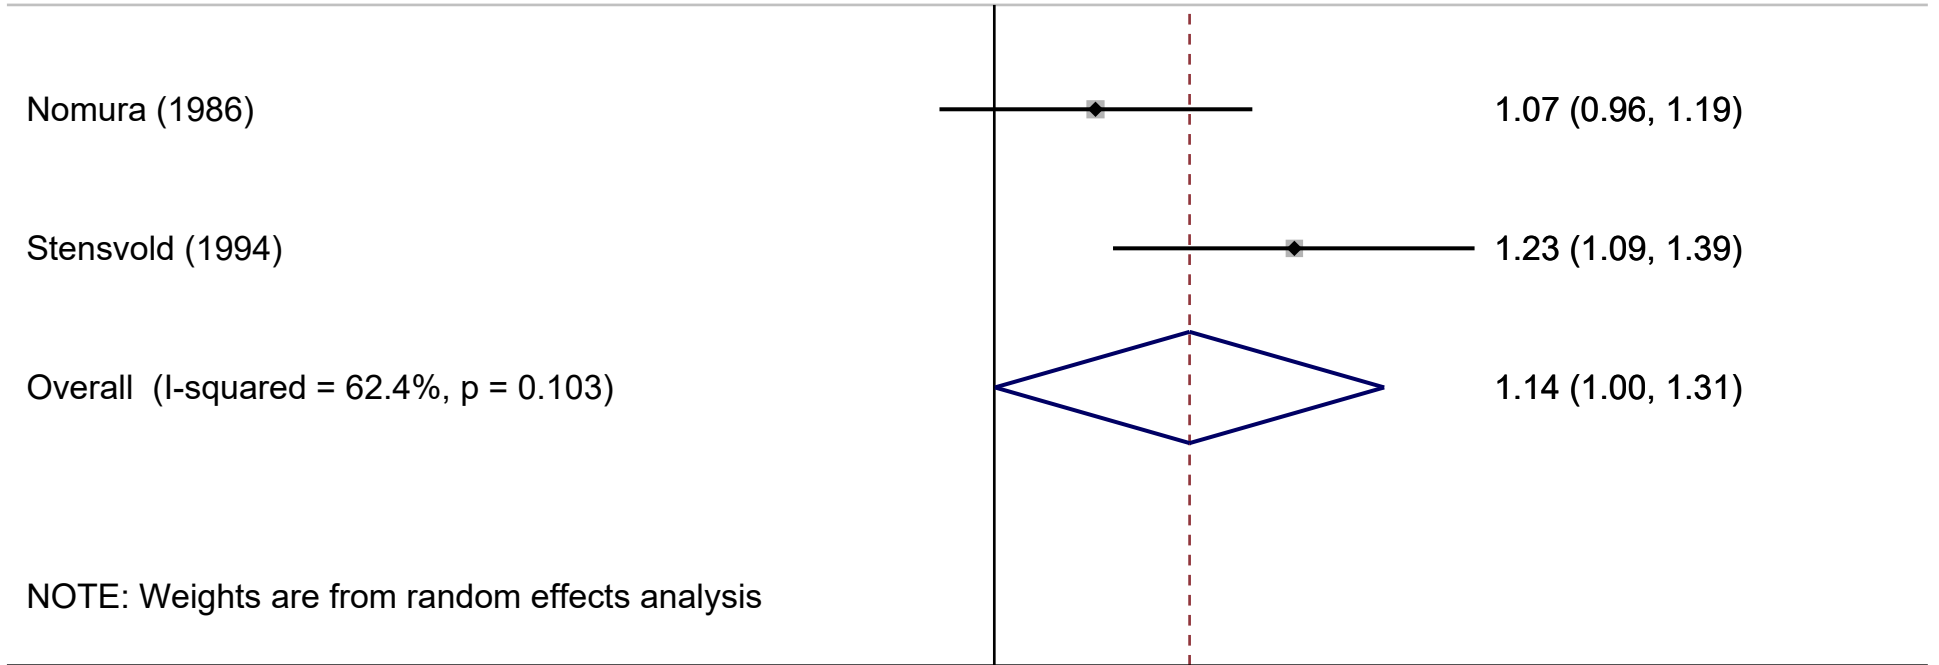



# Supplementary figure 57, Lymphoma, H/L, only cohort studies

Study

ID

RR (95% CI)

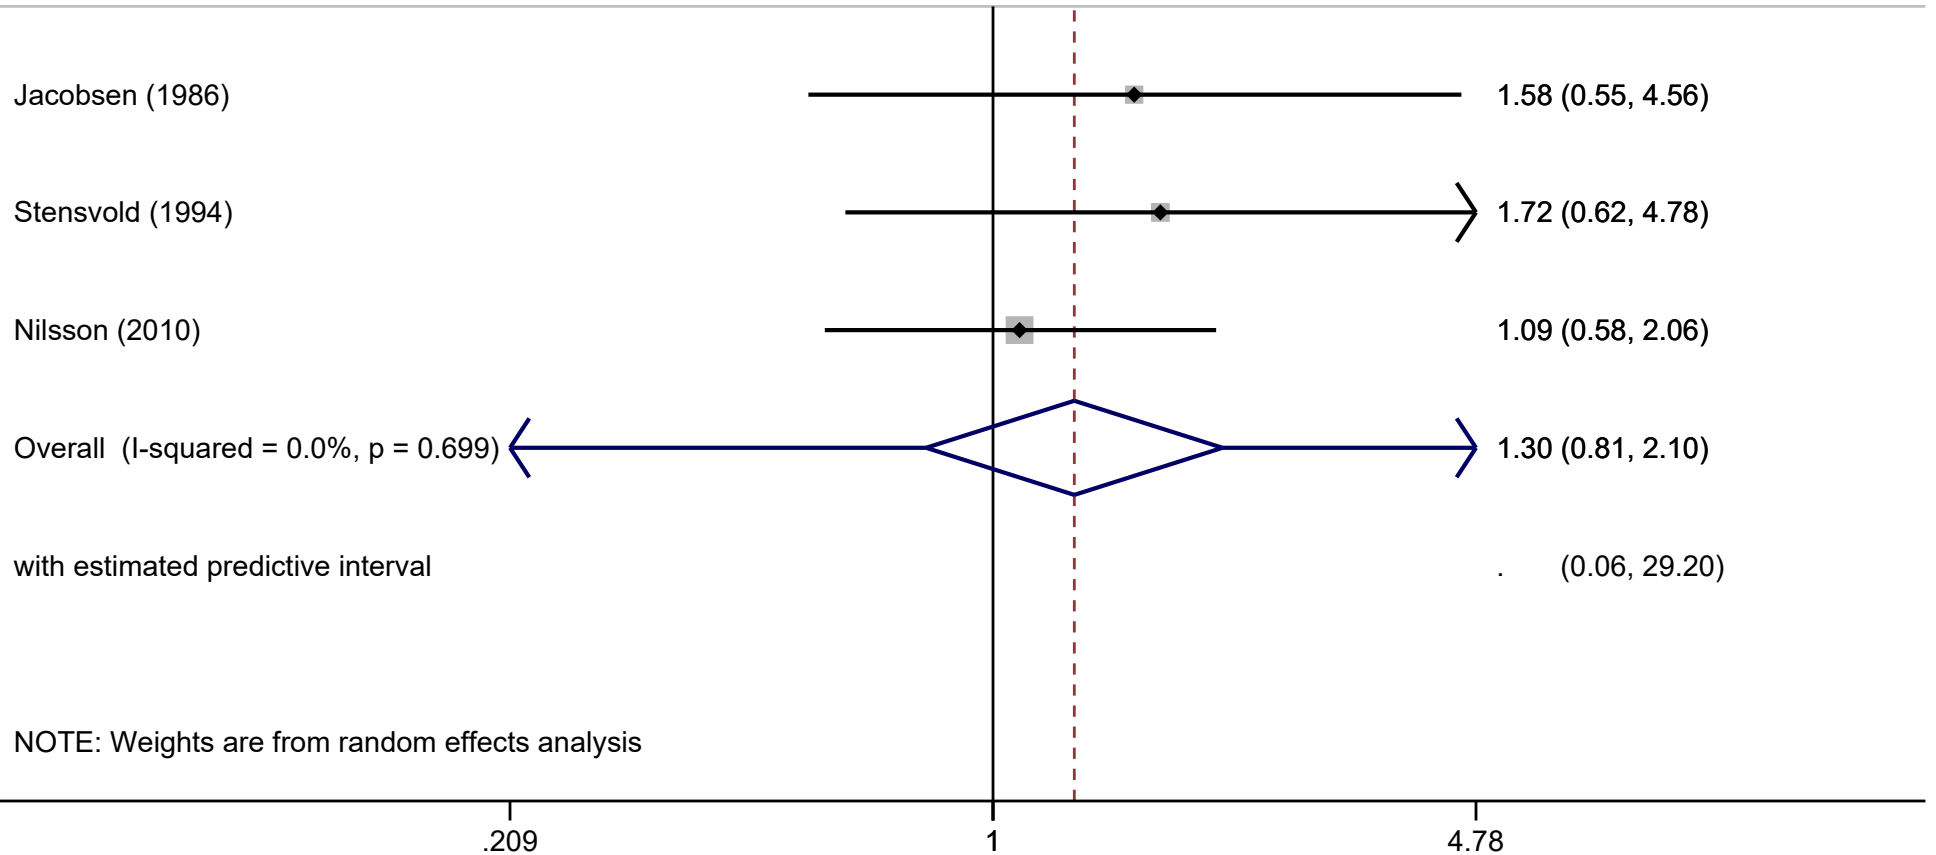

NOTE: Weights are from random effects analysis

# Supplementary figure 58, Melanoma, H/L, only cohort studies

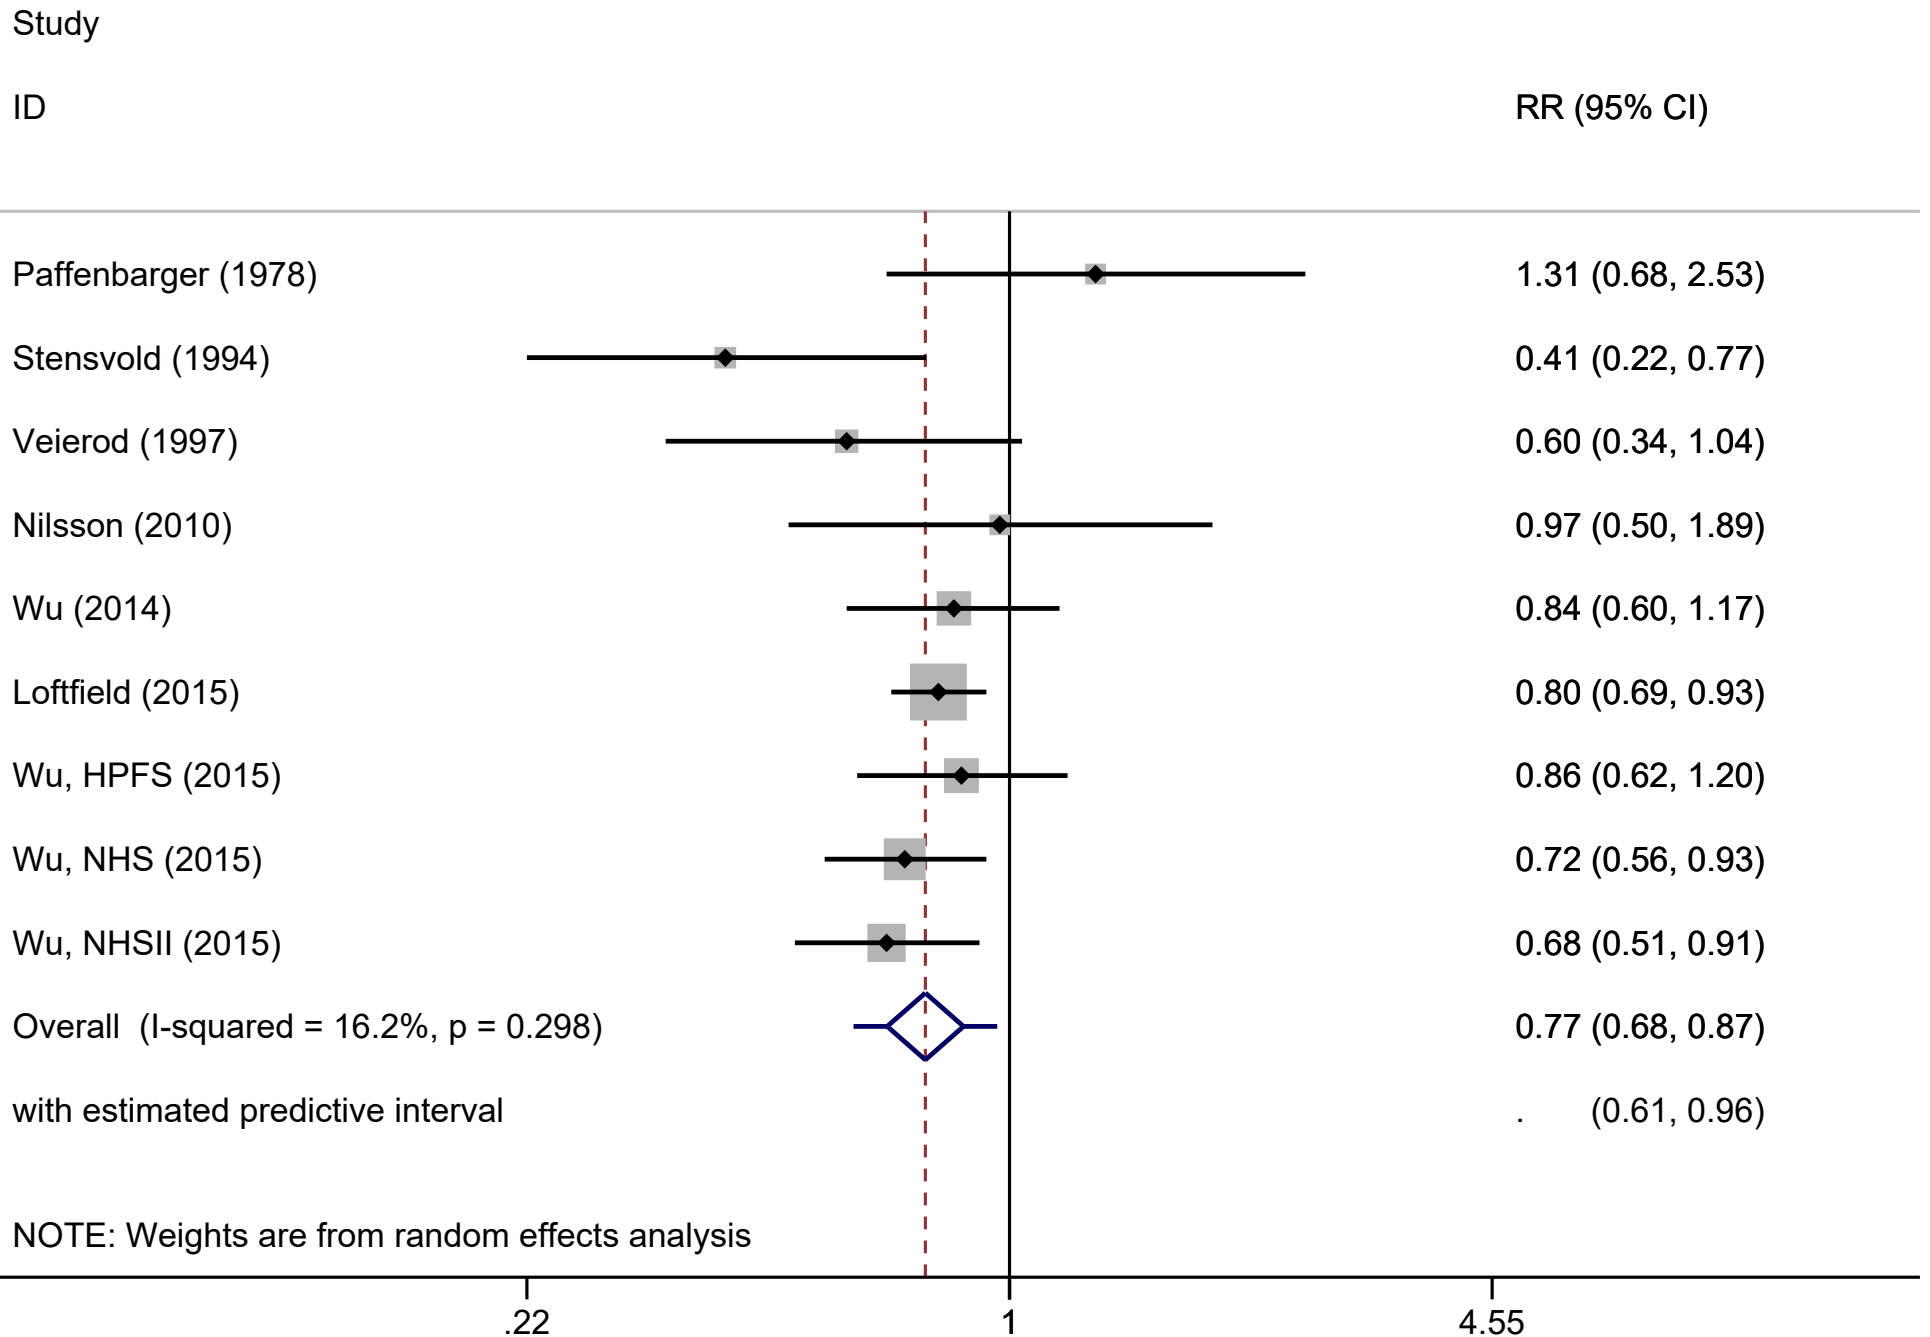

Supplementary figure 59, Nonmelanoma, H/L, only cohort studies

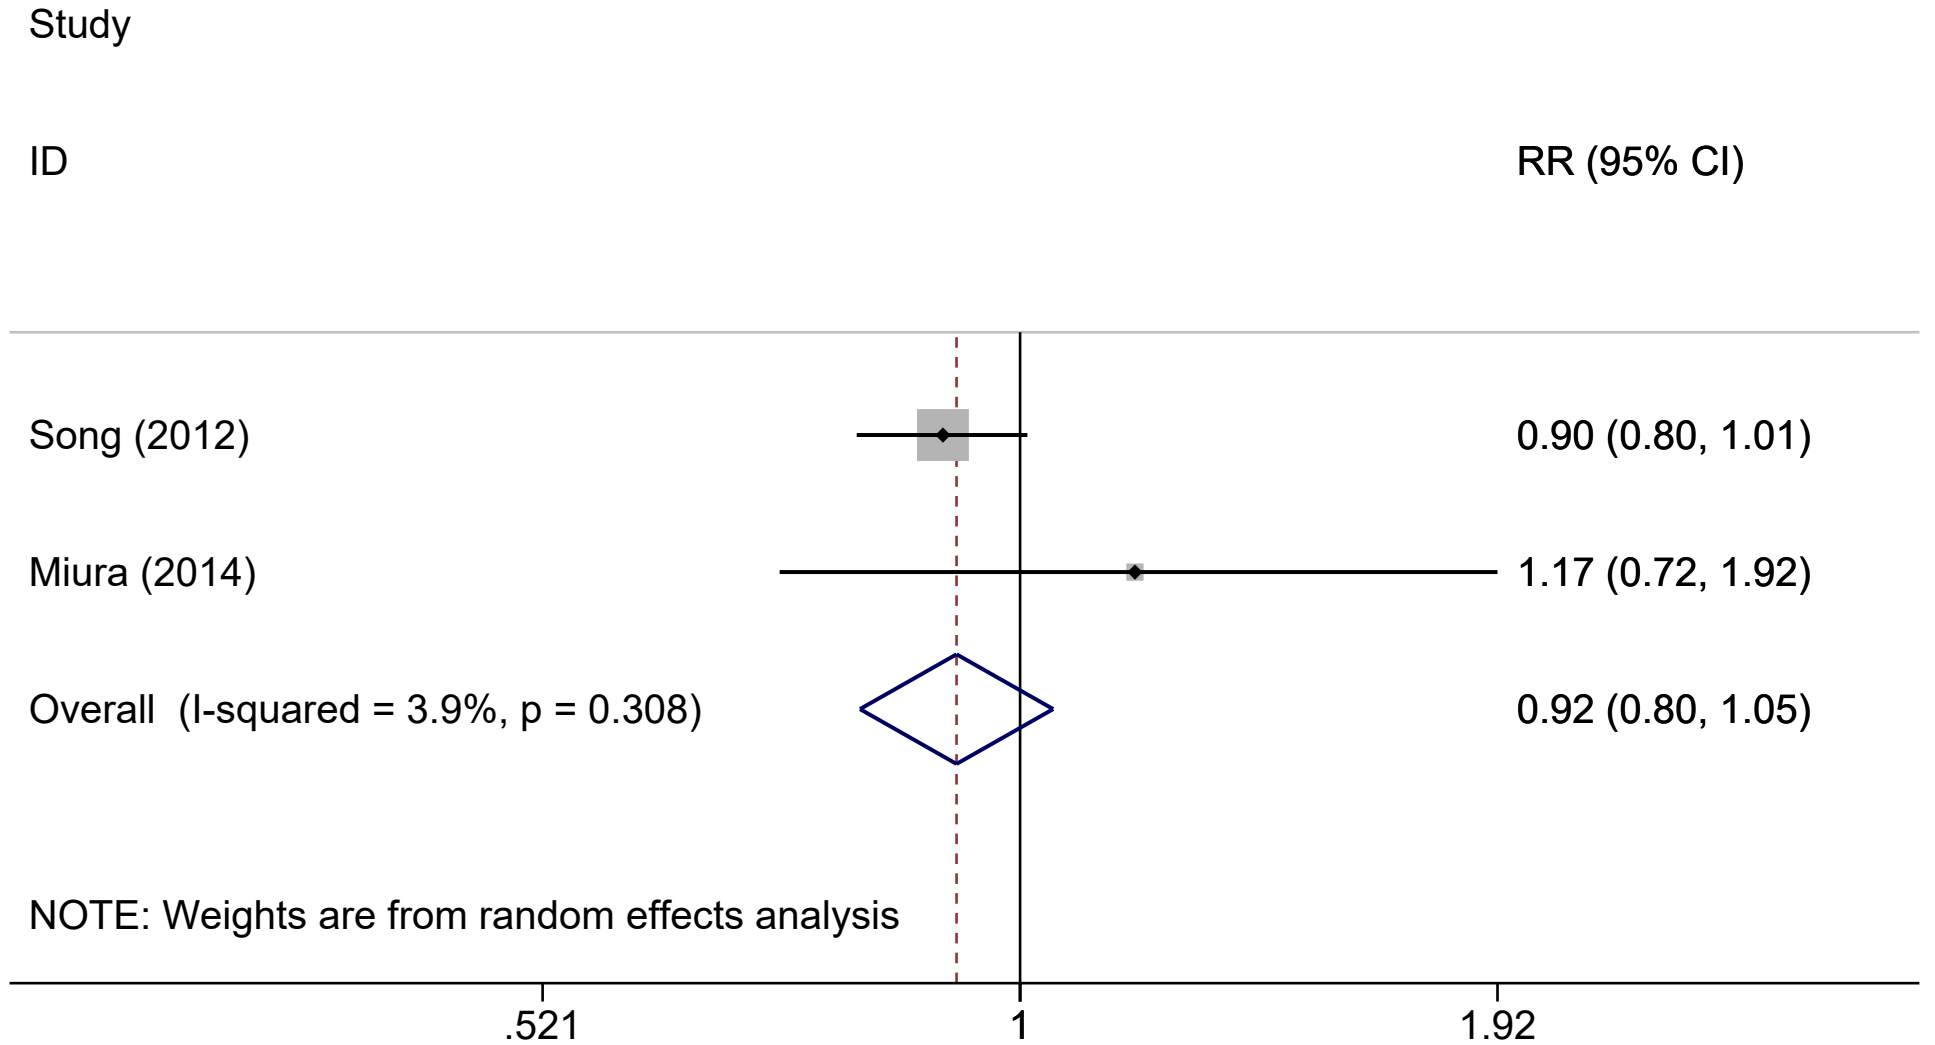

# Supplementary figure 60, Oral cancer, H/L, only cohort studies

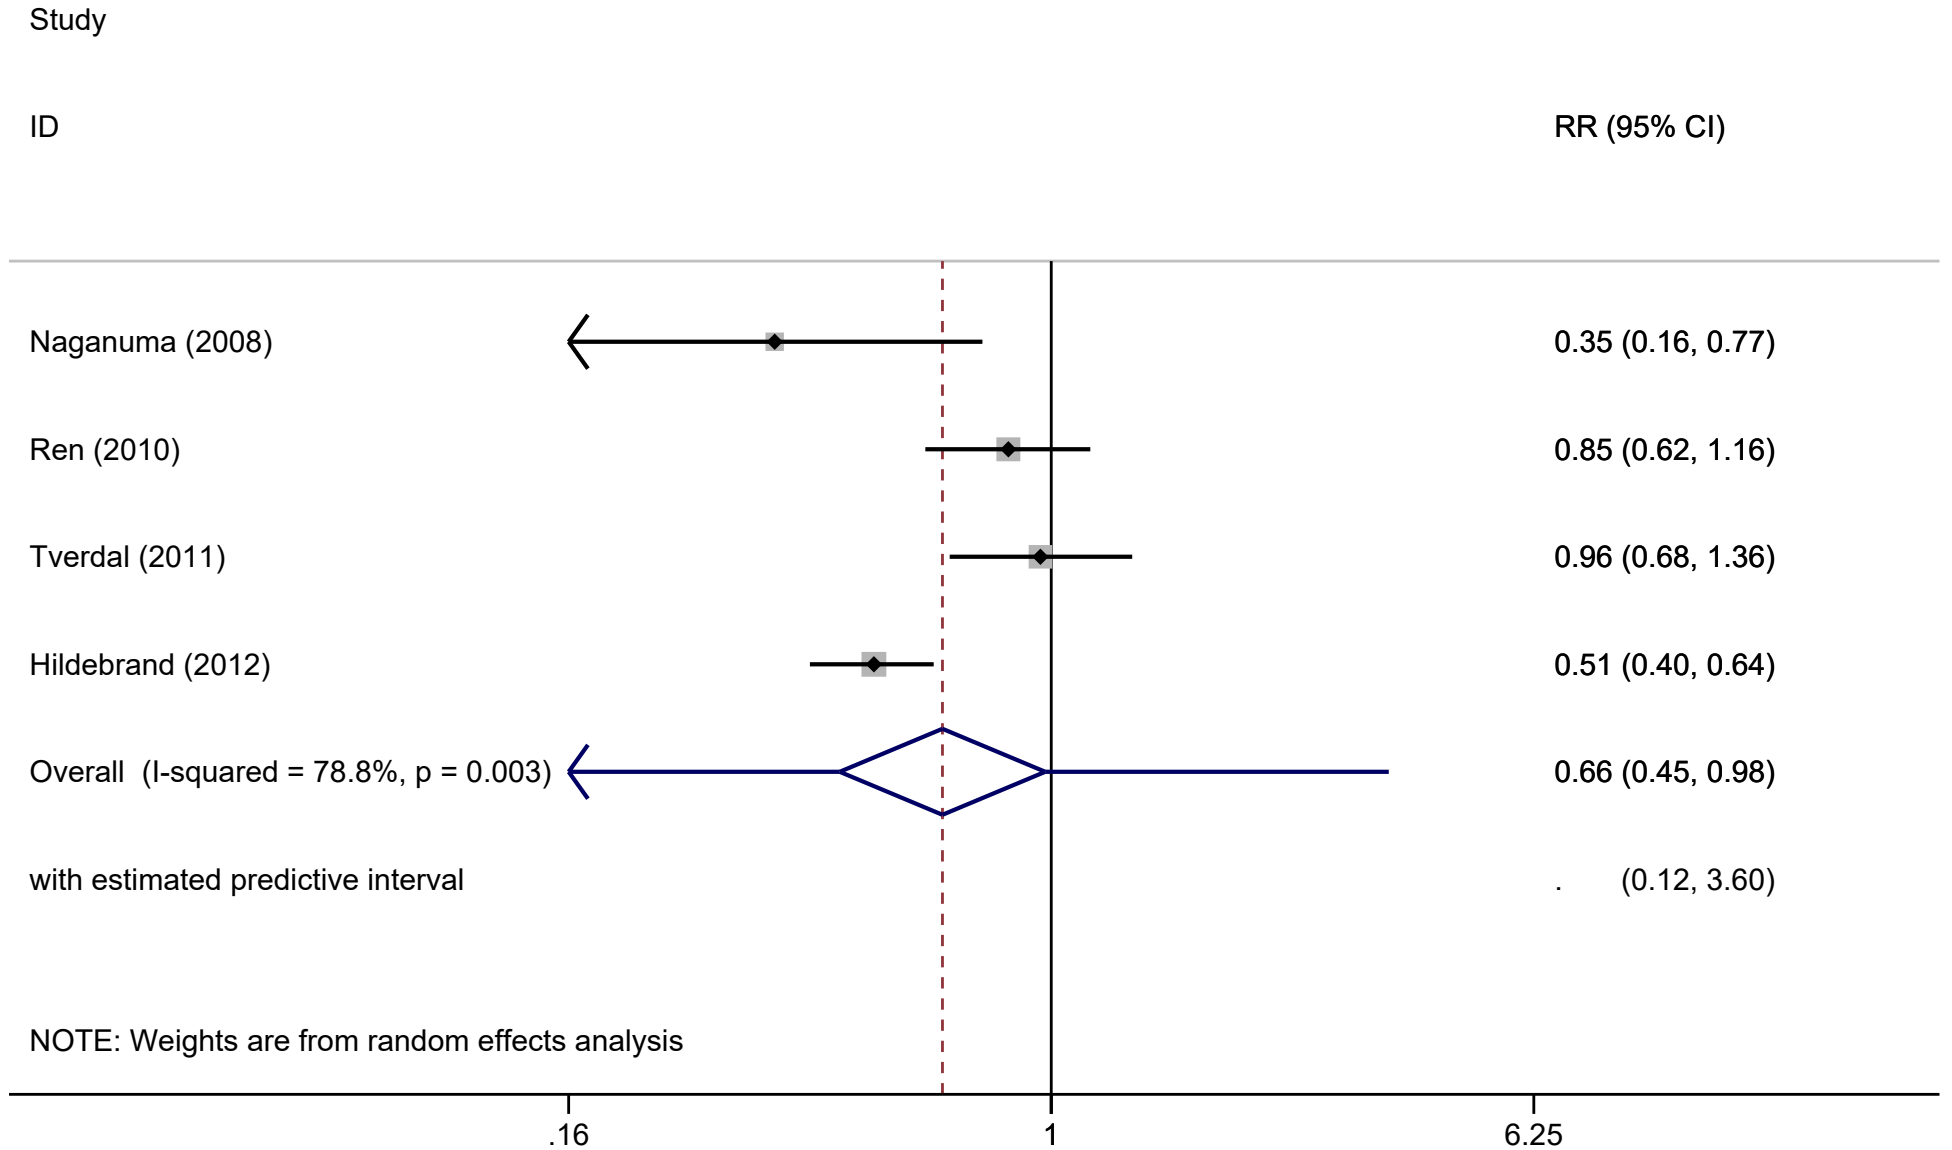

# Supplementary figure 61, Oral/pharynx cancer, H/L, only cohort studies

Study

ID

RR (95% CI)

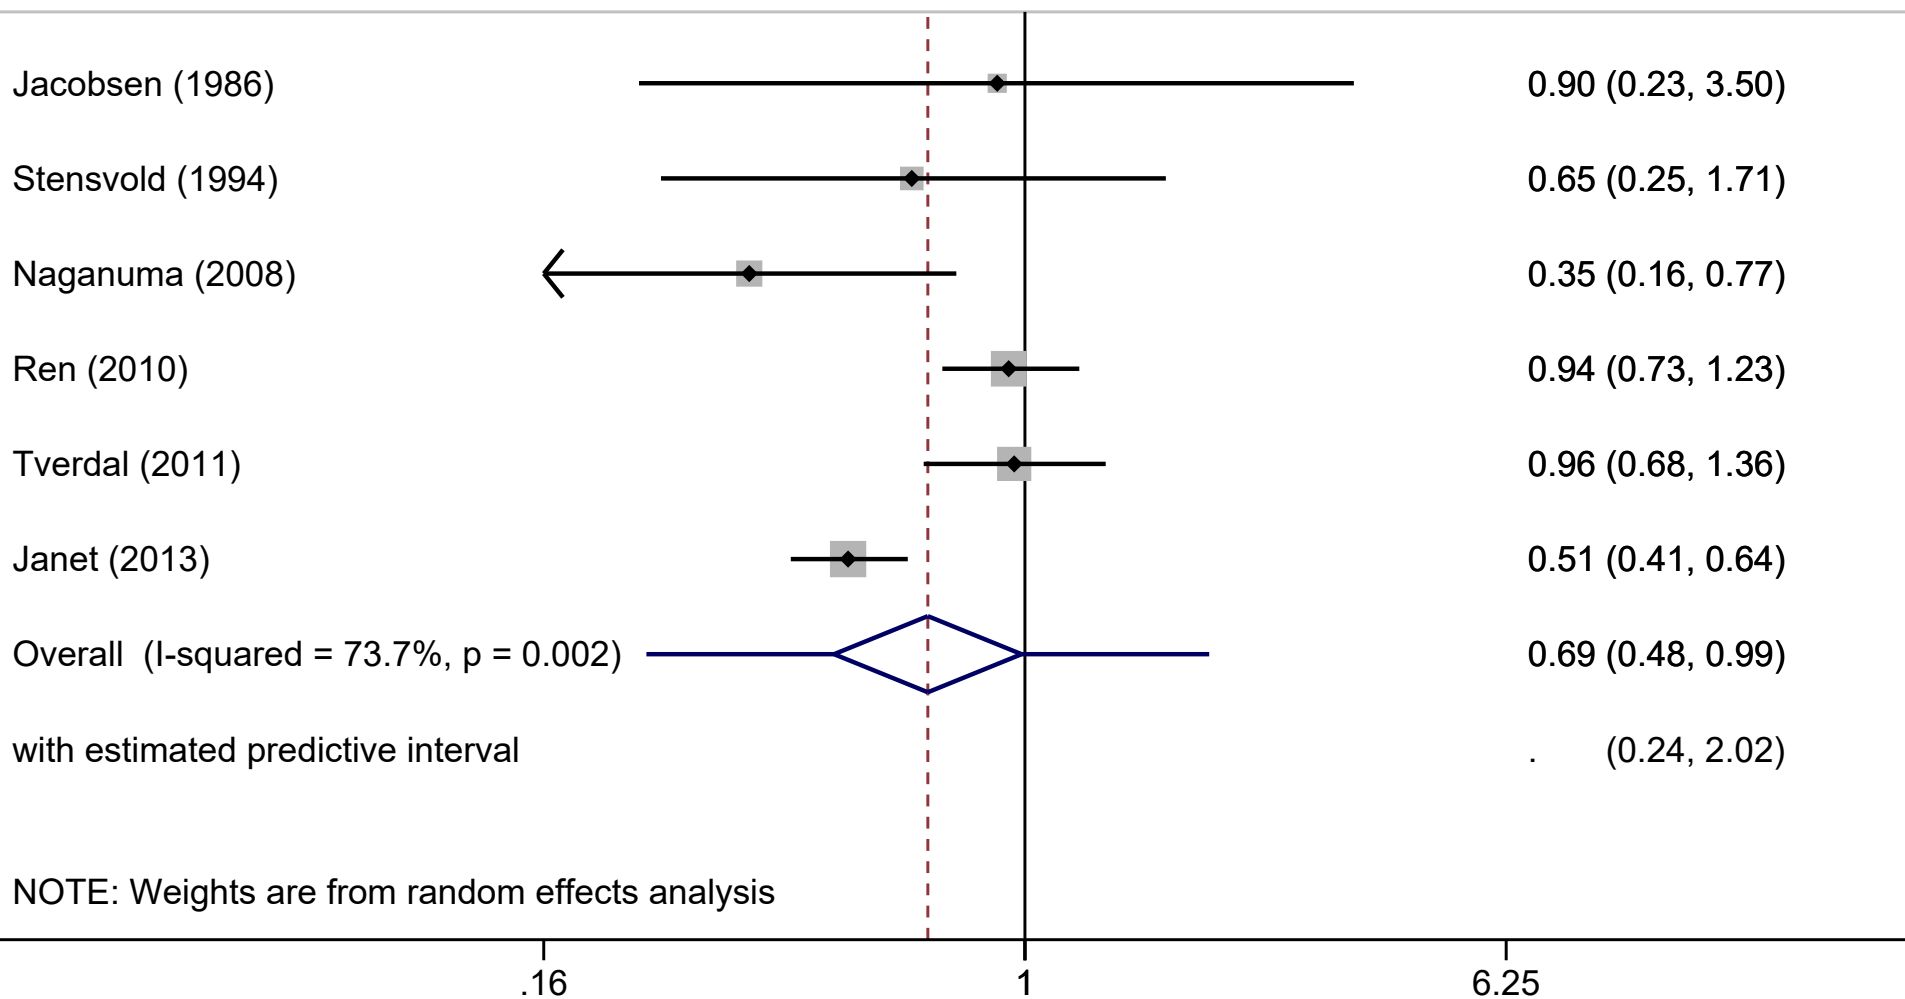

# Supplementary figure 62, Ovarian cancer, H/L, only cohort studies

Study

ID

RR (95% CI)

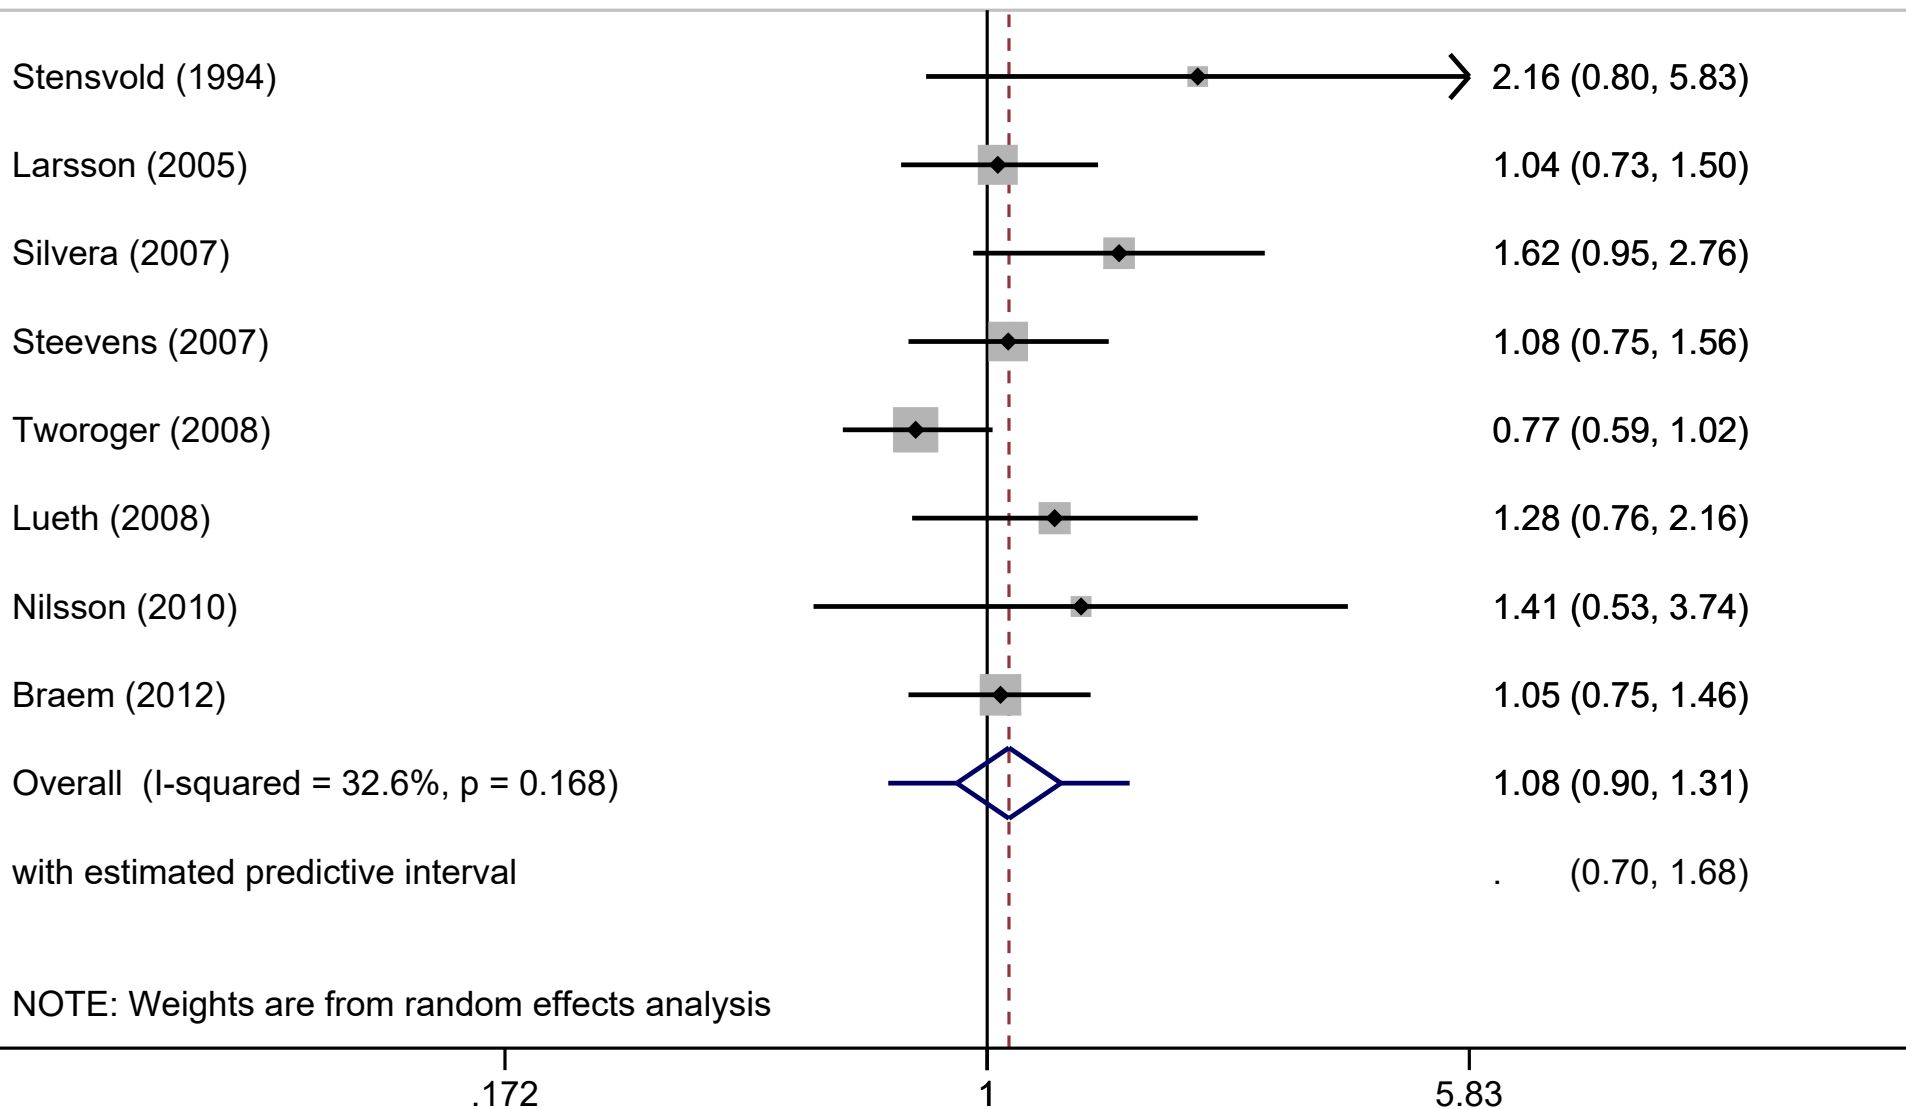

# Supplementary figure 63, Pancreatic cancer, H/L, only cohort studies

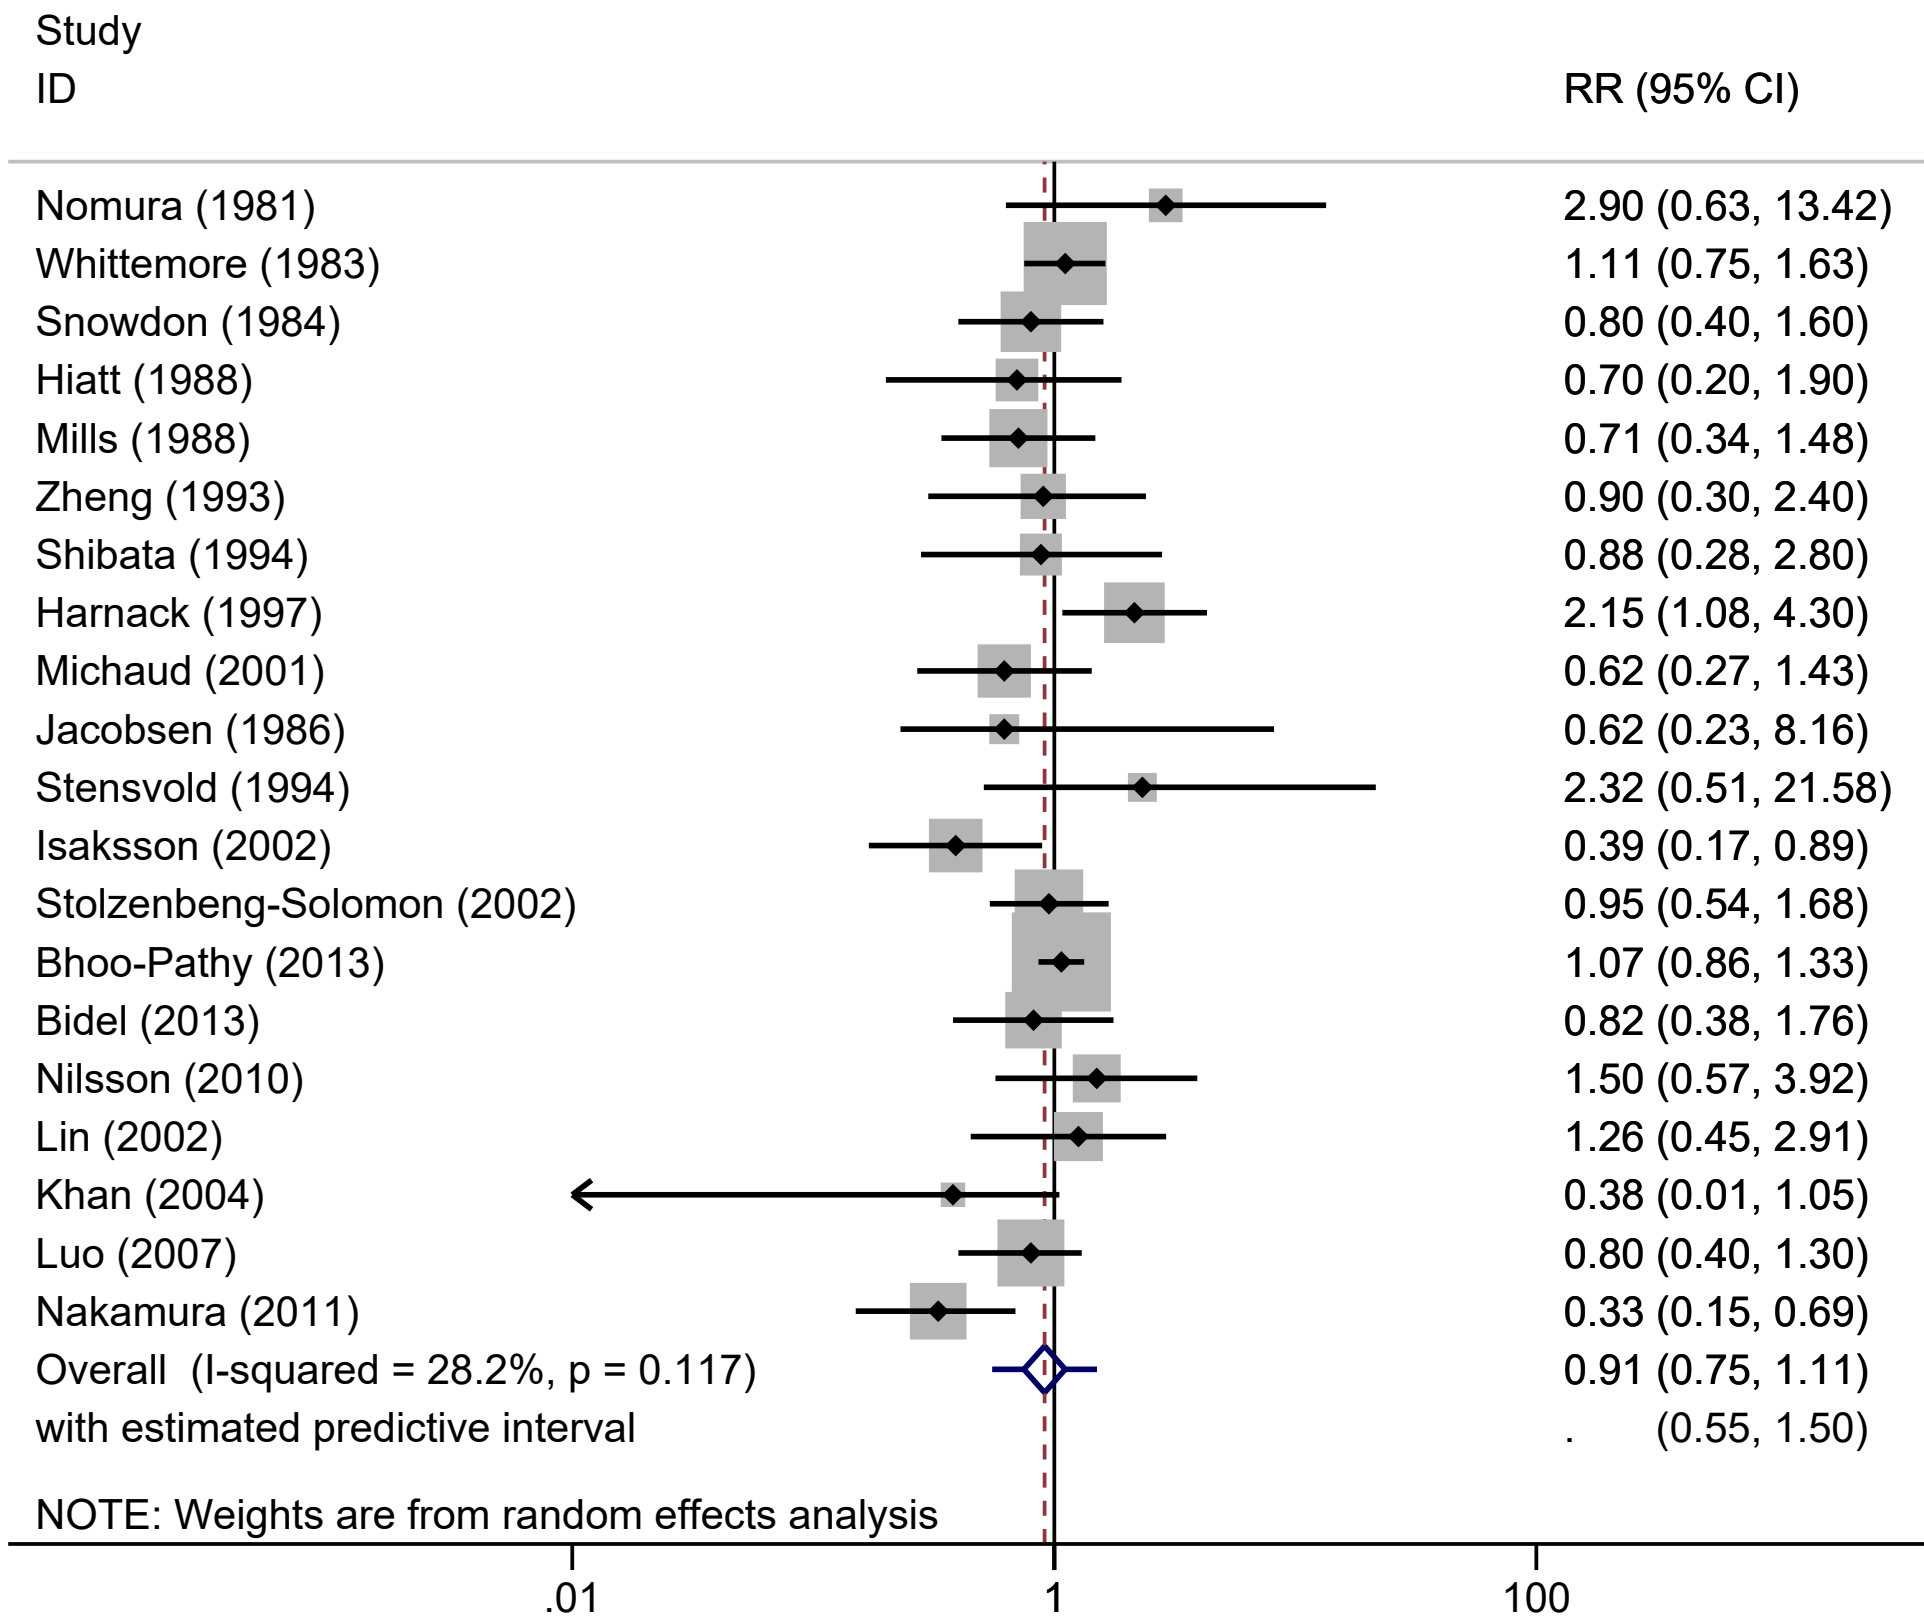

# Supplementary figure 64, Pancreatic cancer, Per 1 cup, only cohort studies

Study

ID RR (95% CI)

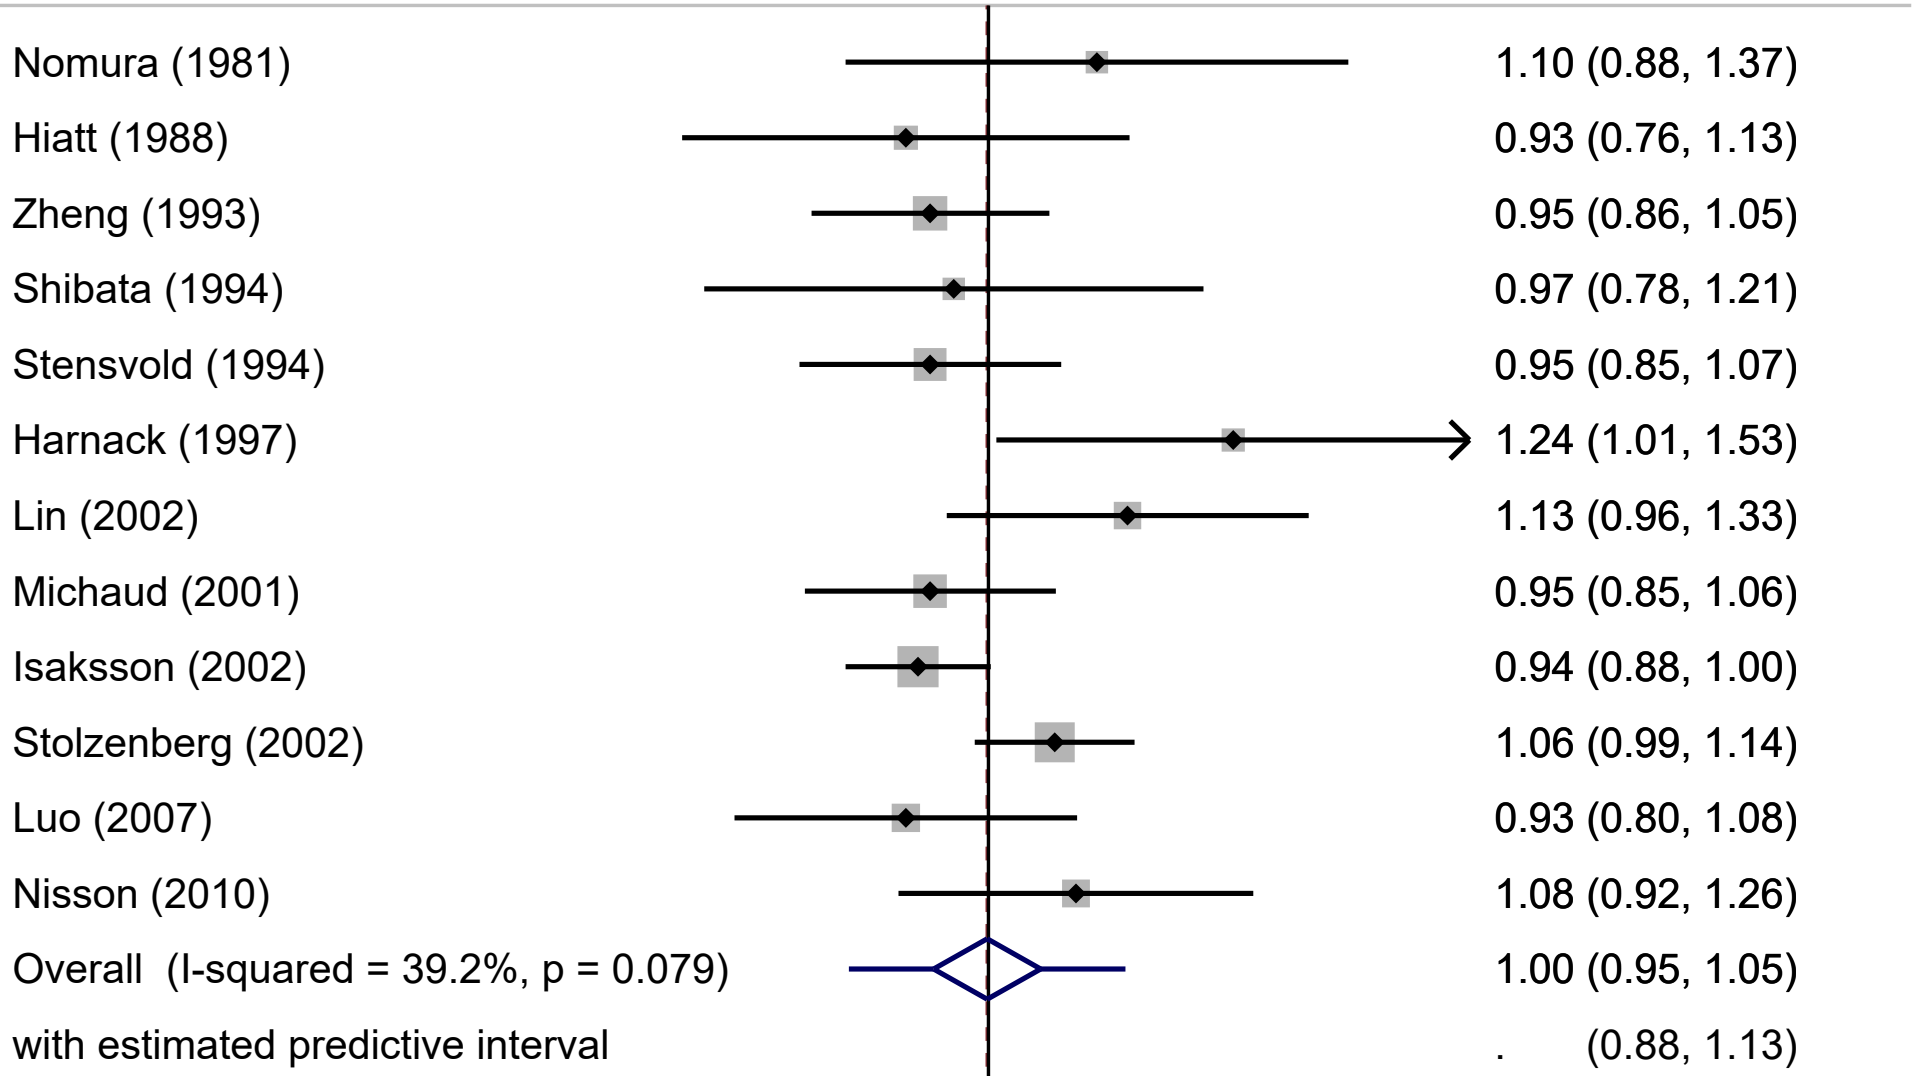

NOTE: Weights are from random effects analysis

.655

1

1.53



# Supplementary figure 65, Prostate cancer, H/L, only cohort studies

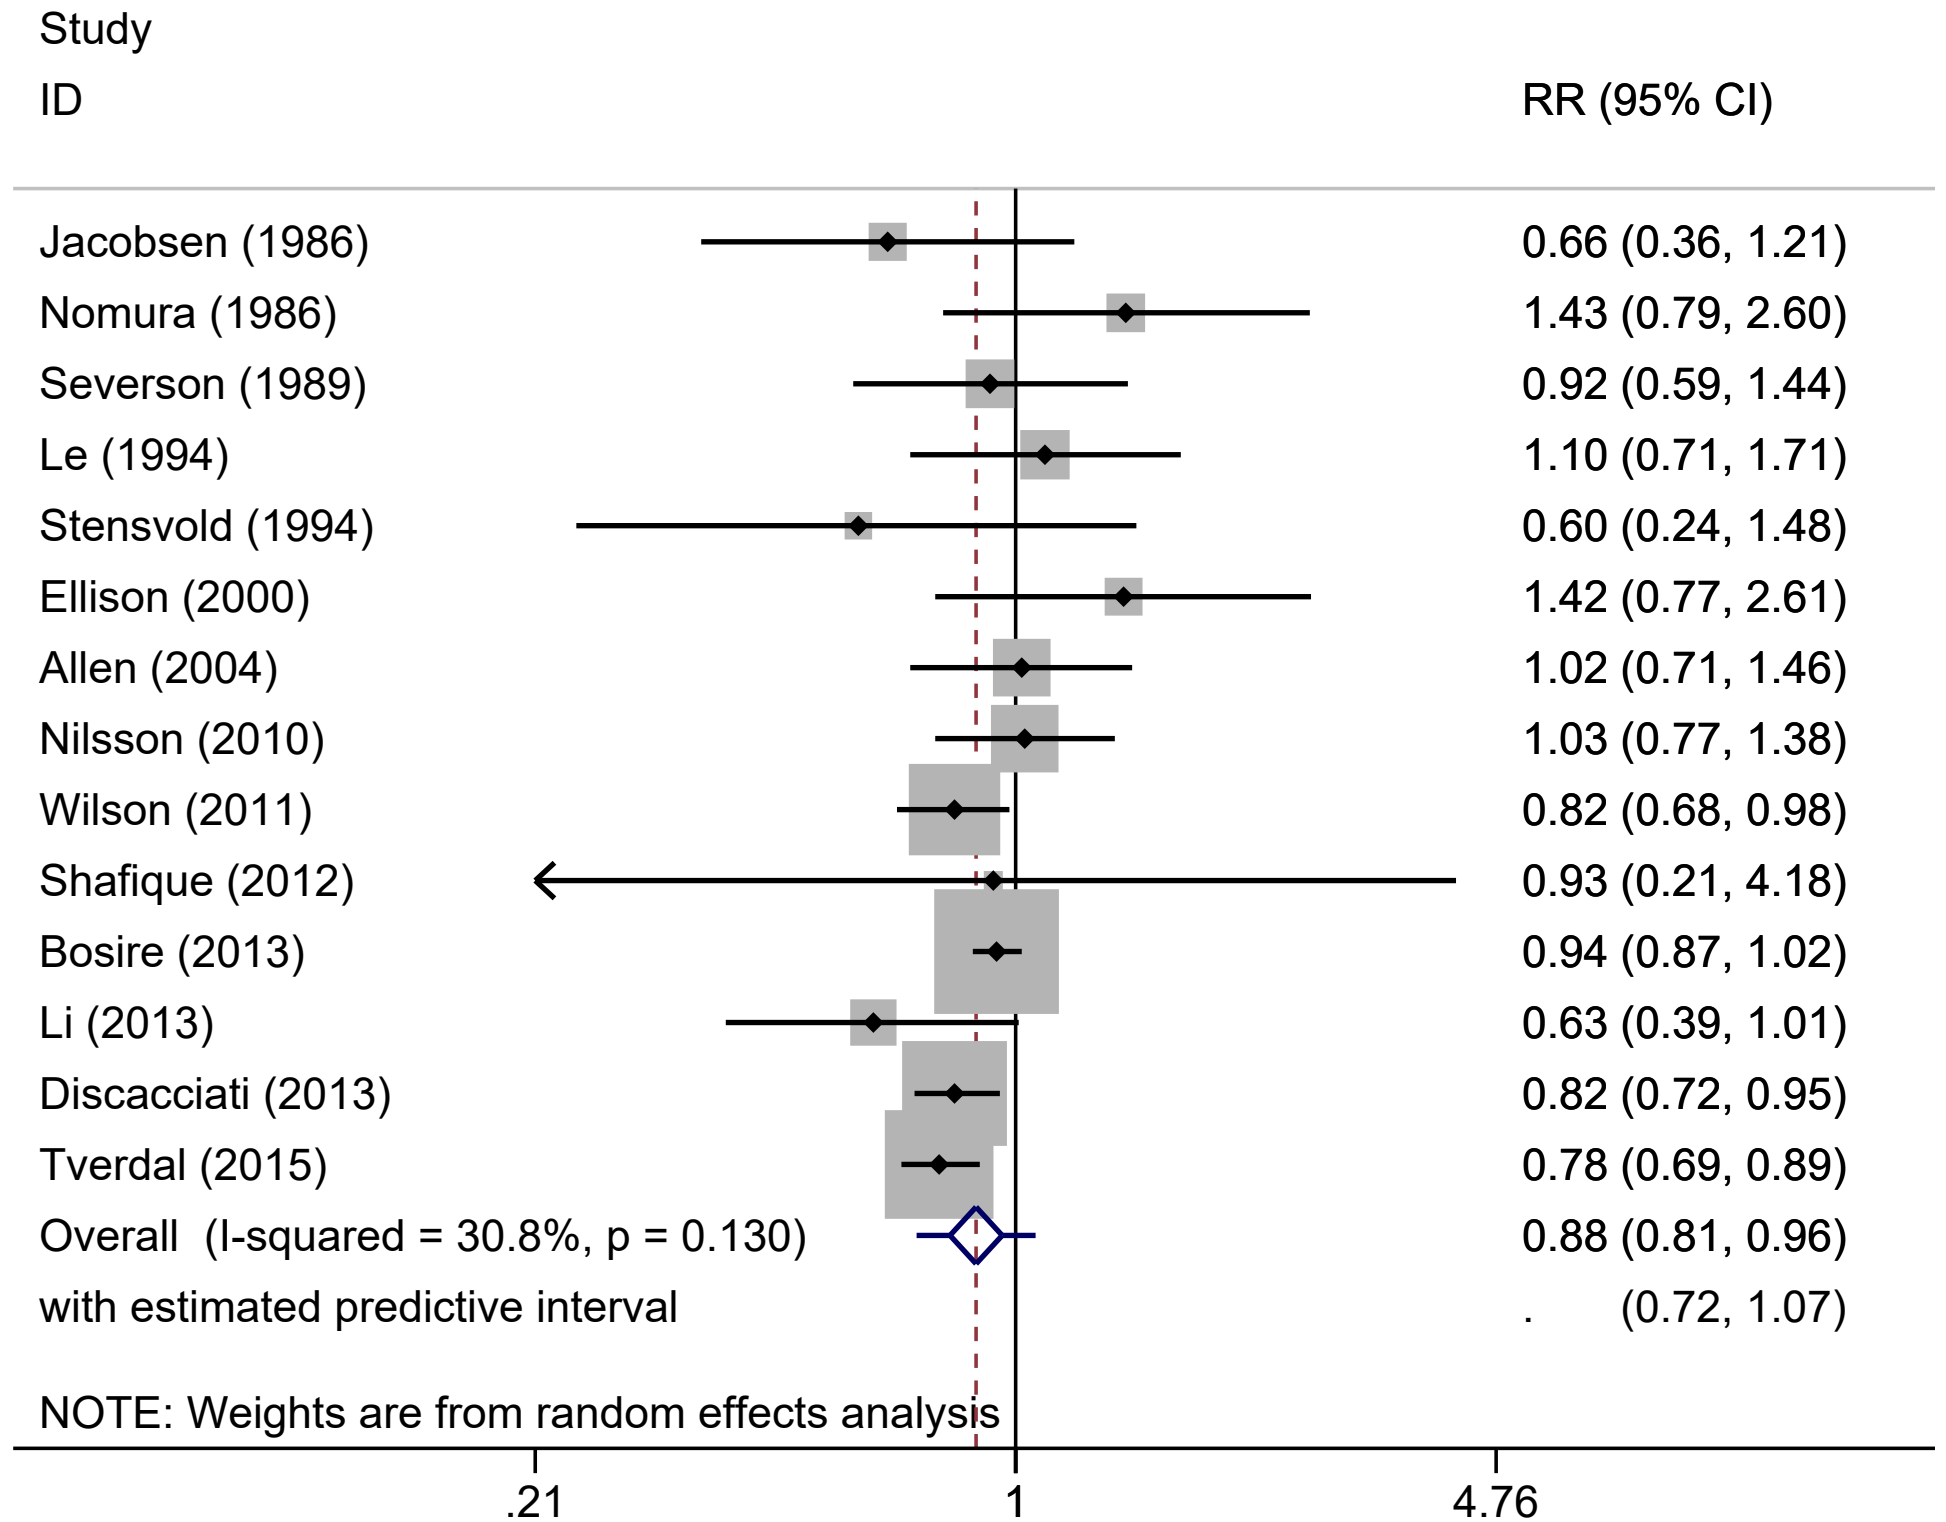

# Supplementary figure 66, Rectal cancer, H/L, only cohort studies

Study

ID

RR (95% CI)

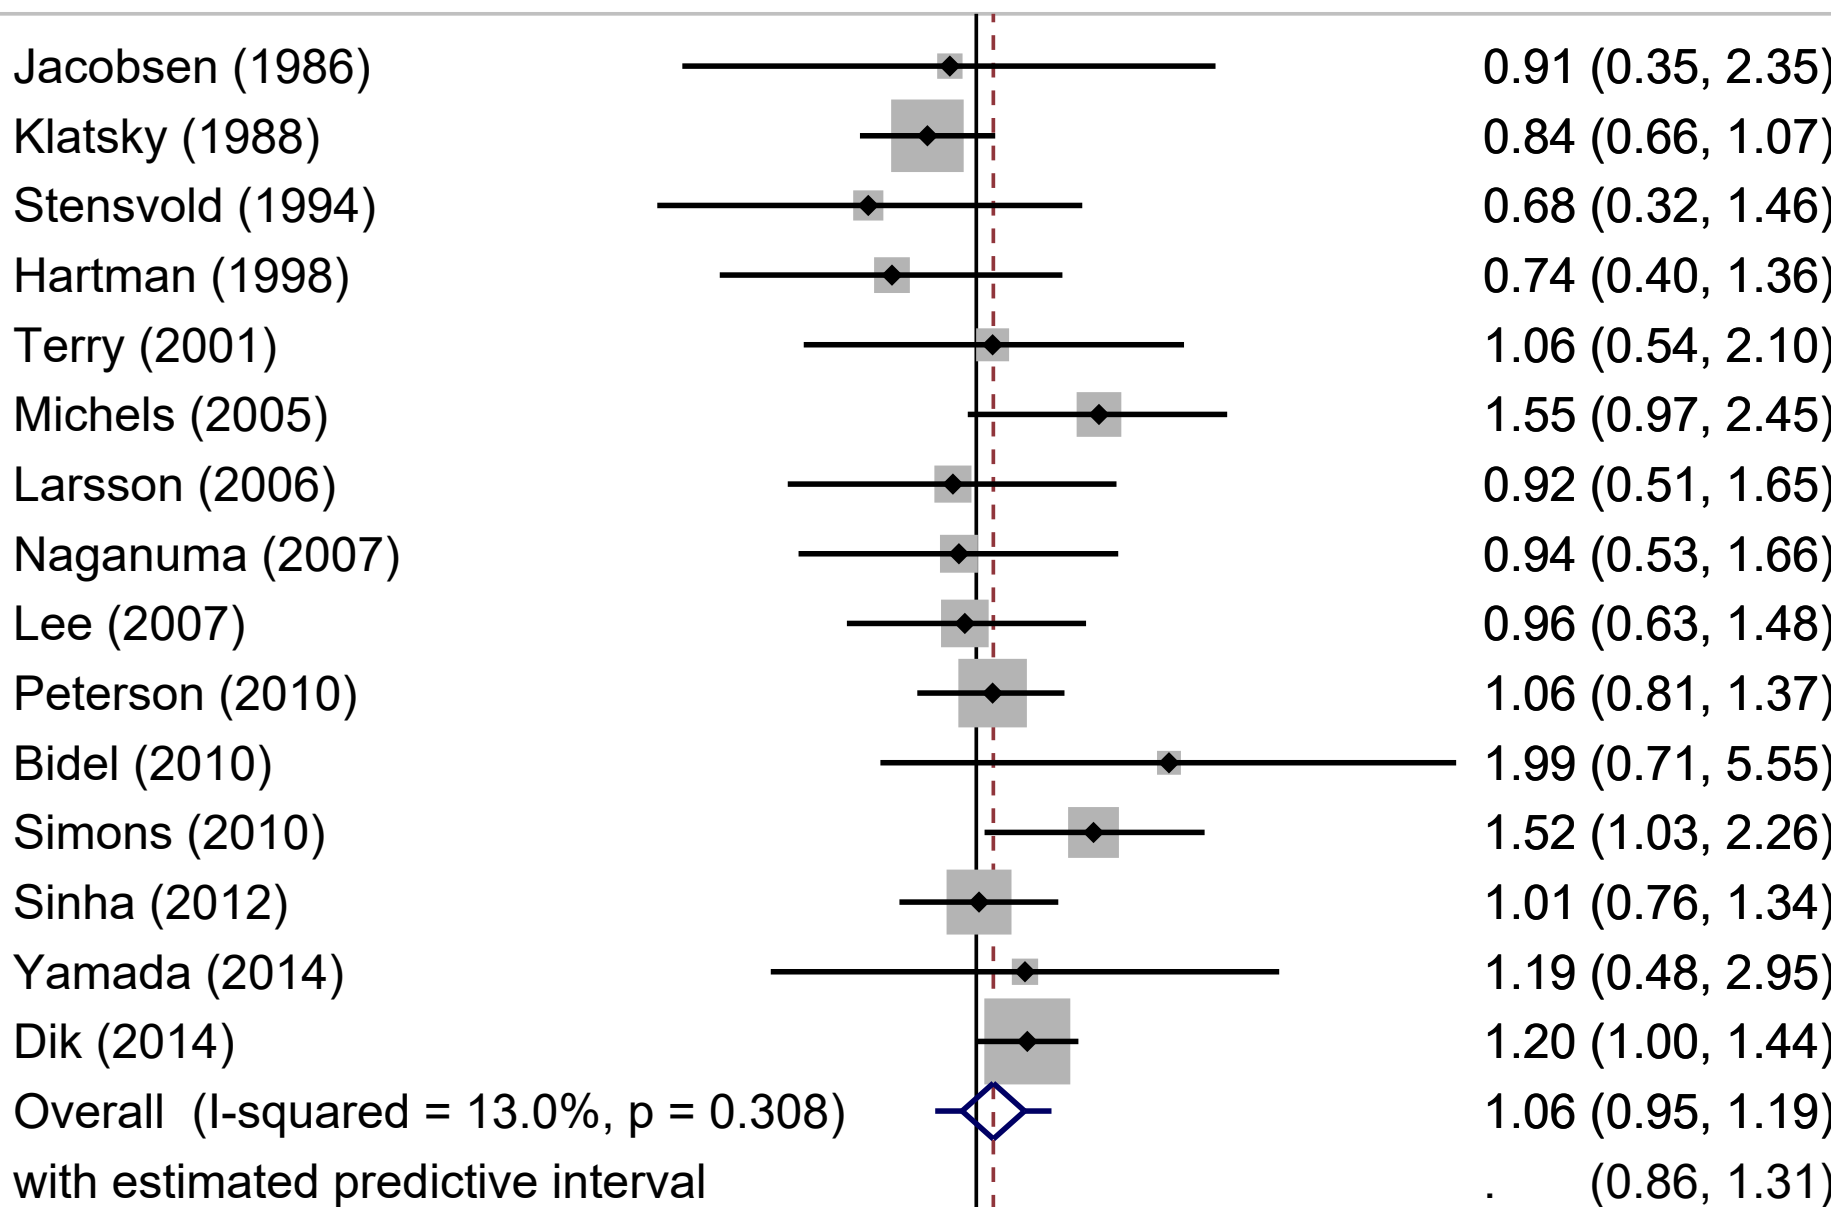

NOTE: Weights are from random effects analysis

.18

1

5.55

# Supplementary figure 67, Rectal cancer, Per 1 cup, only cohort studies

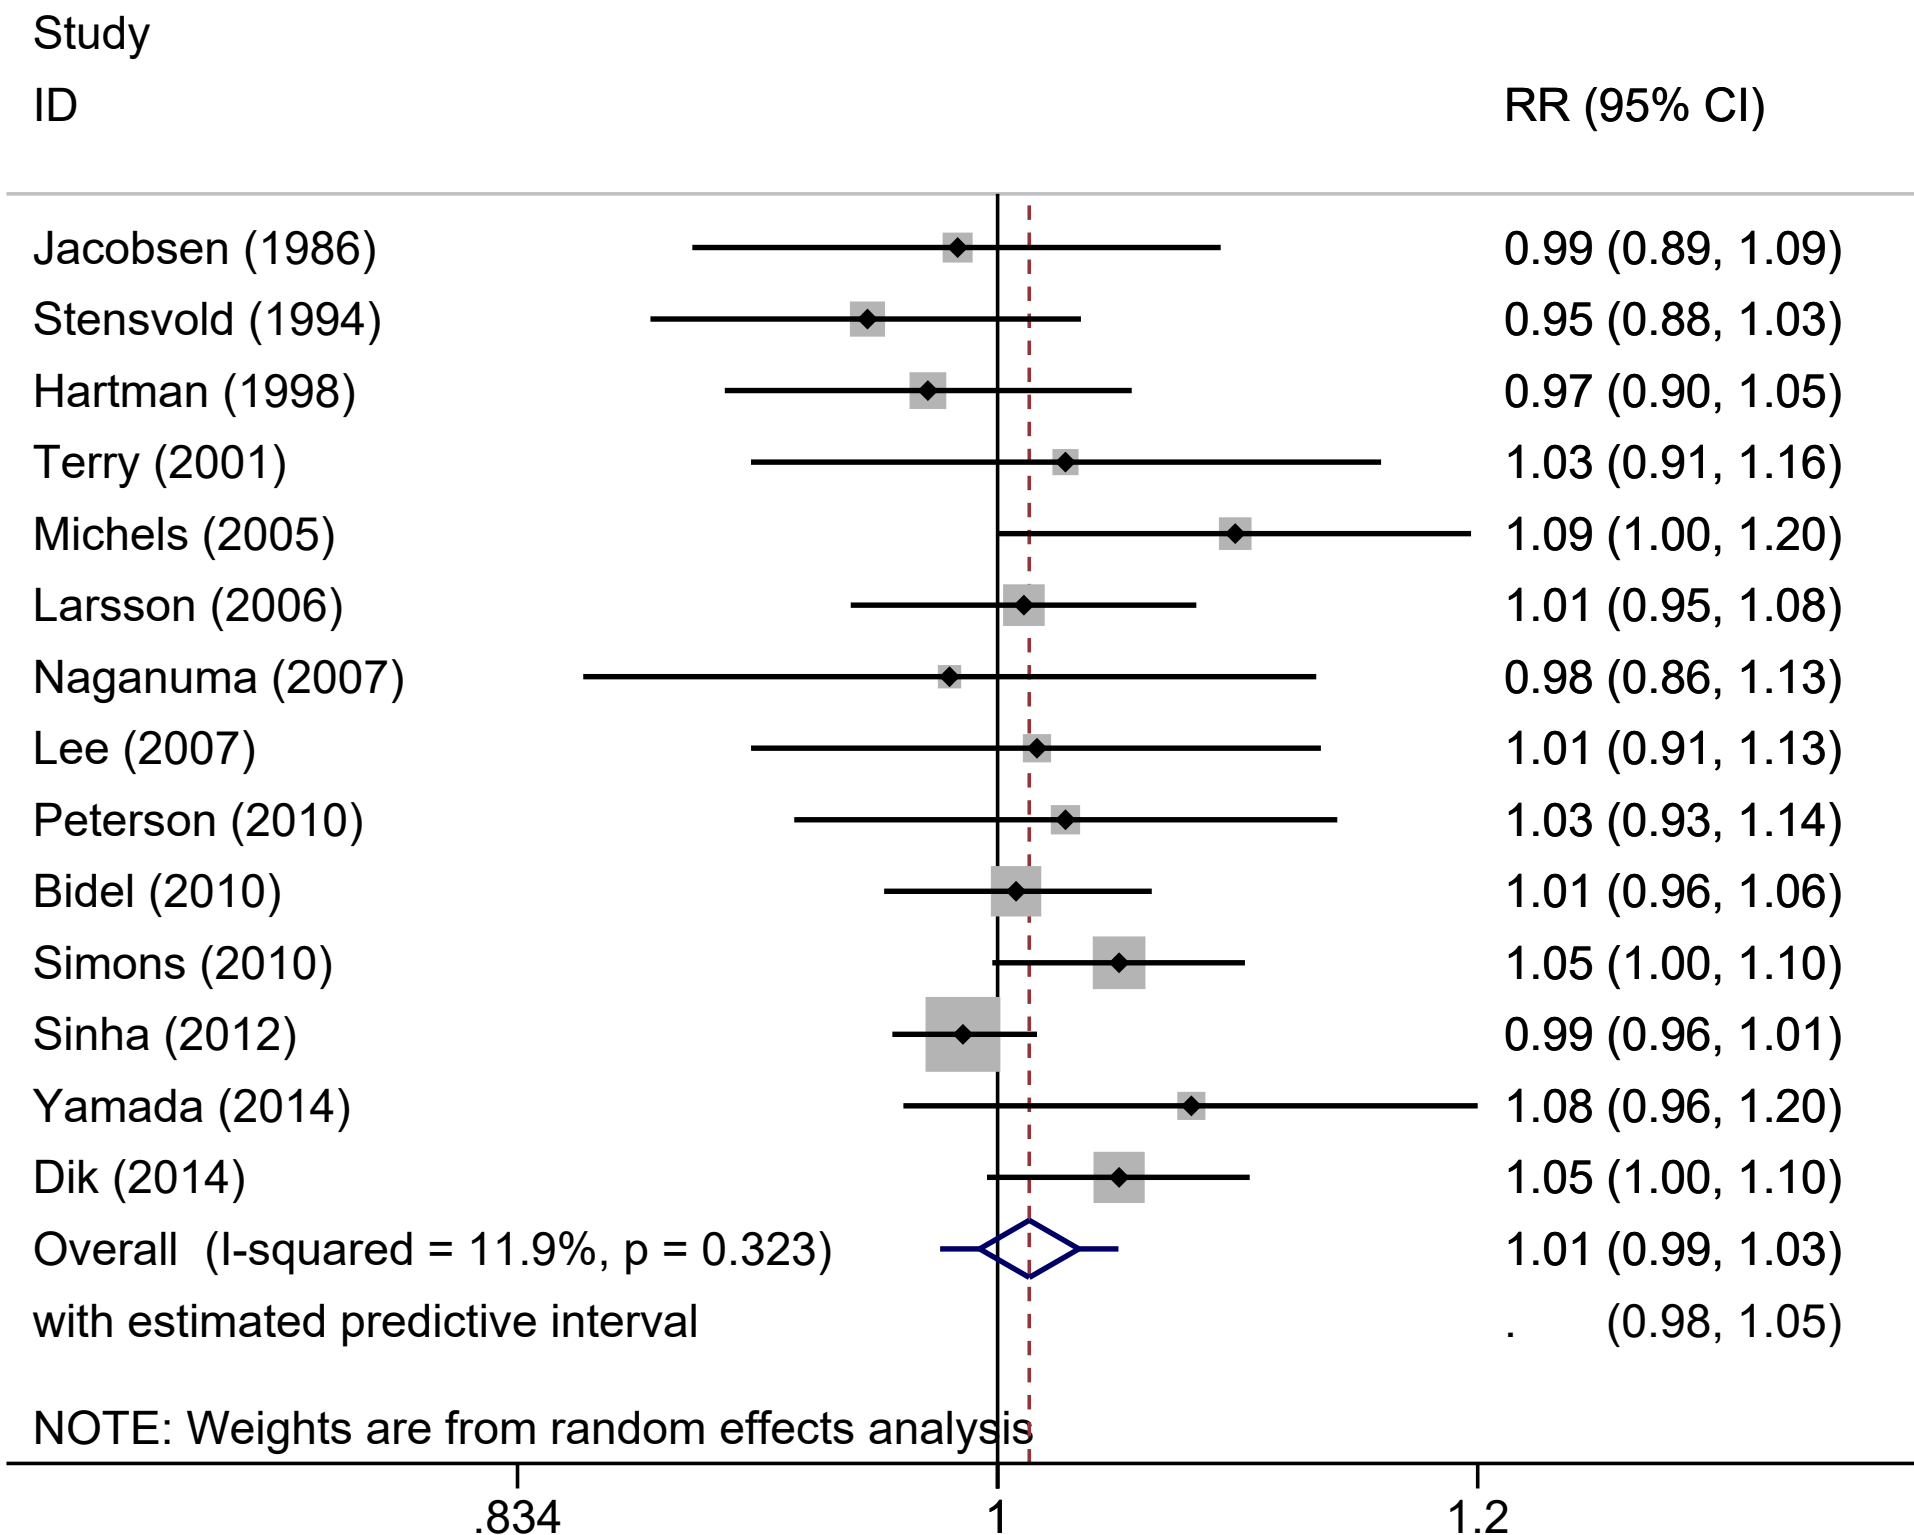

Supplementary figure 68, Thyroid cancer, H/L, only cohort studies

Study

ID

RR (95% CI)

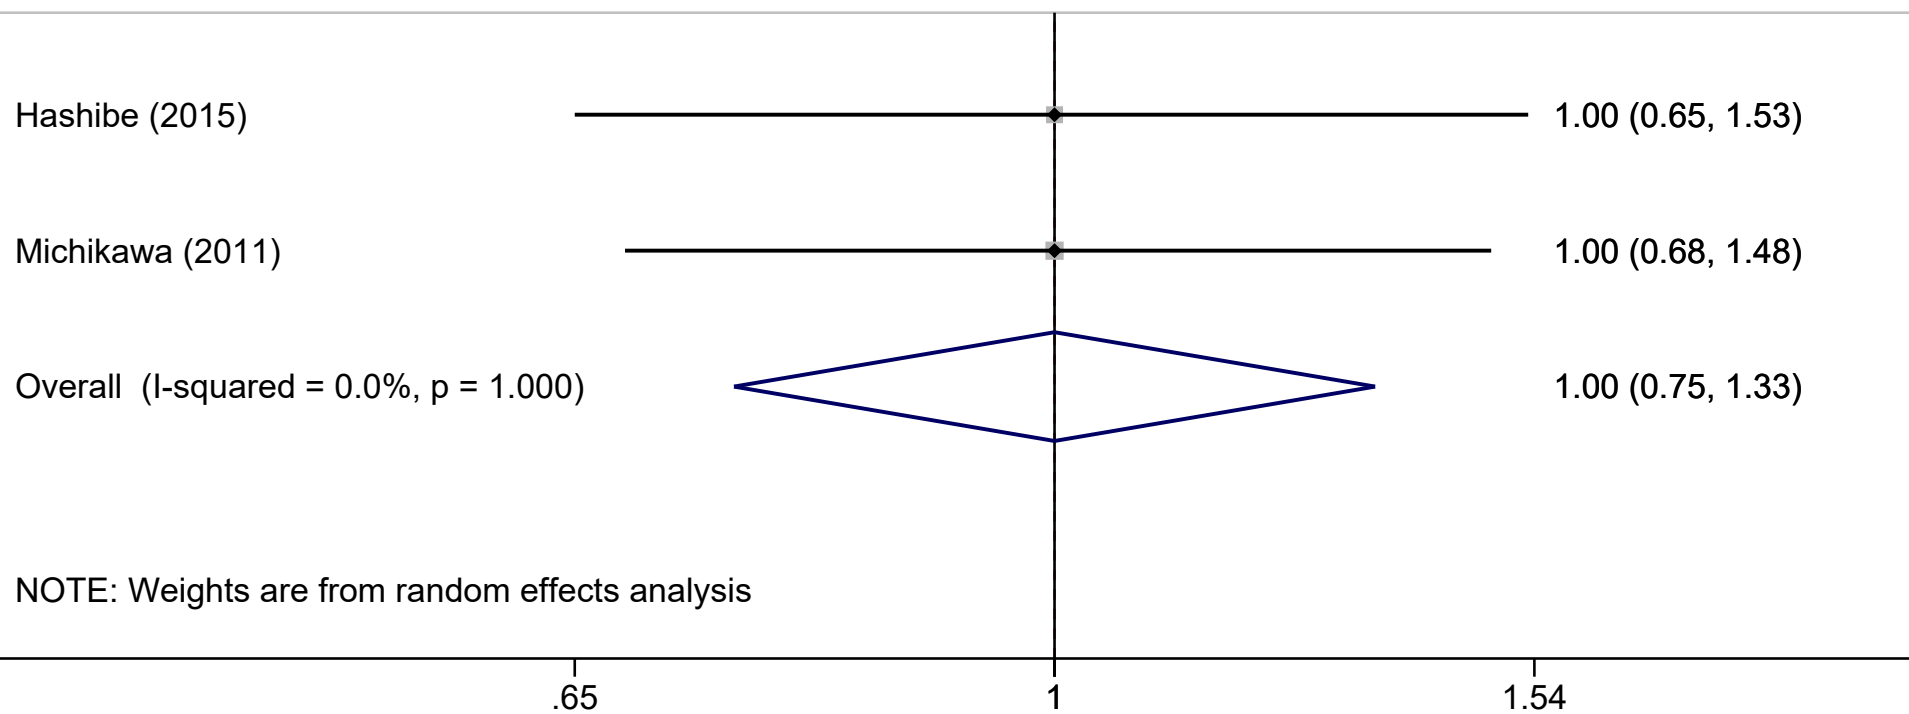

# Supplementary figure 69, Biliary tract cancer, H/L, only cohort studies

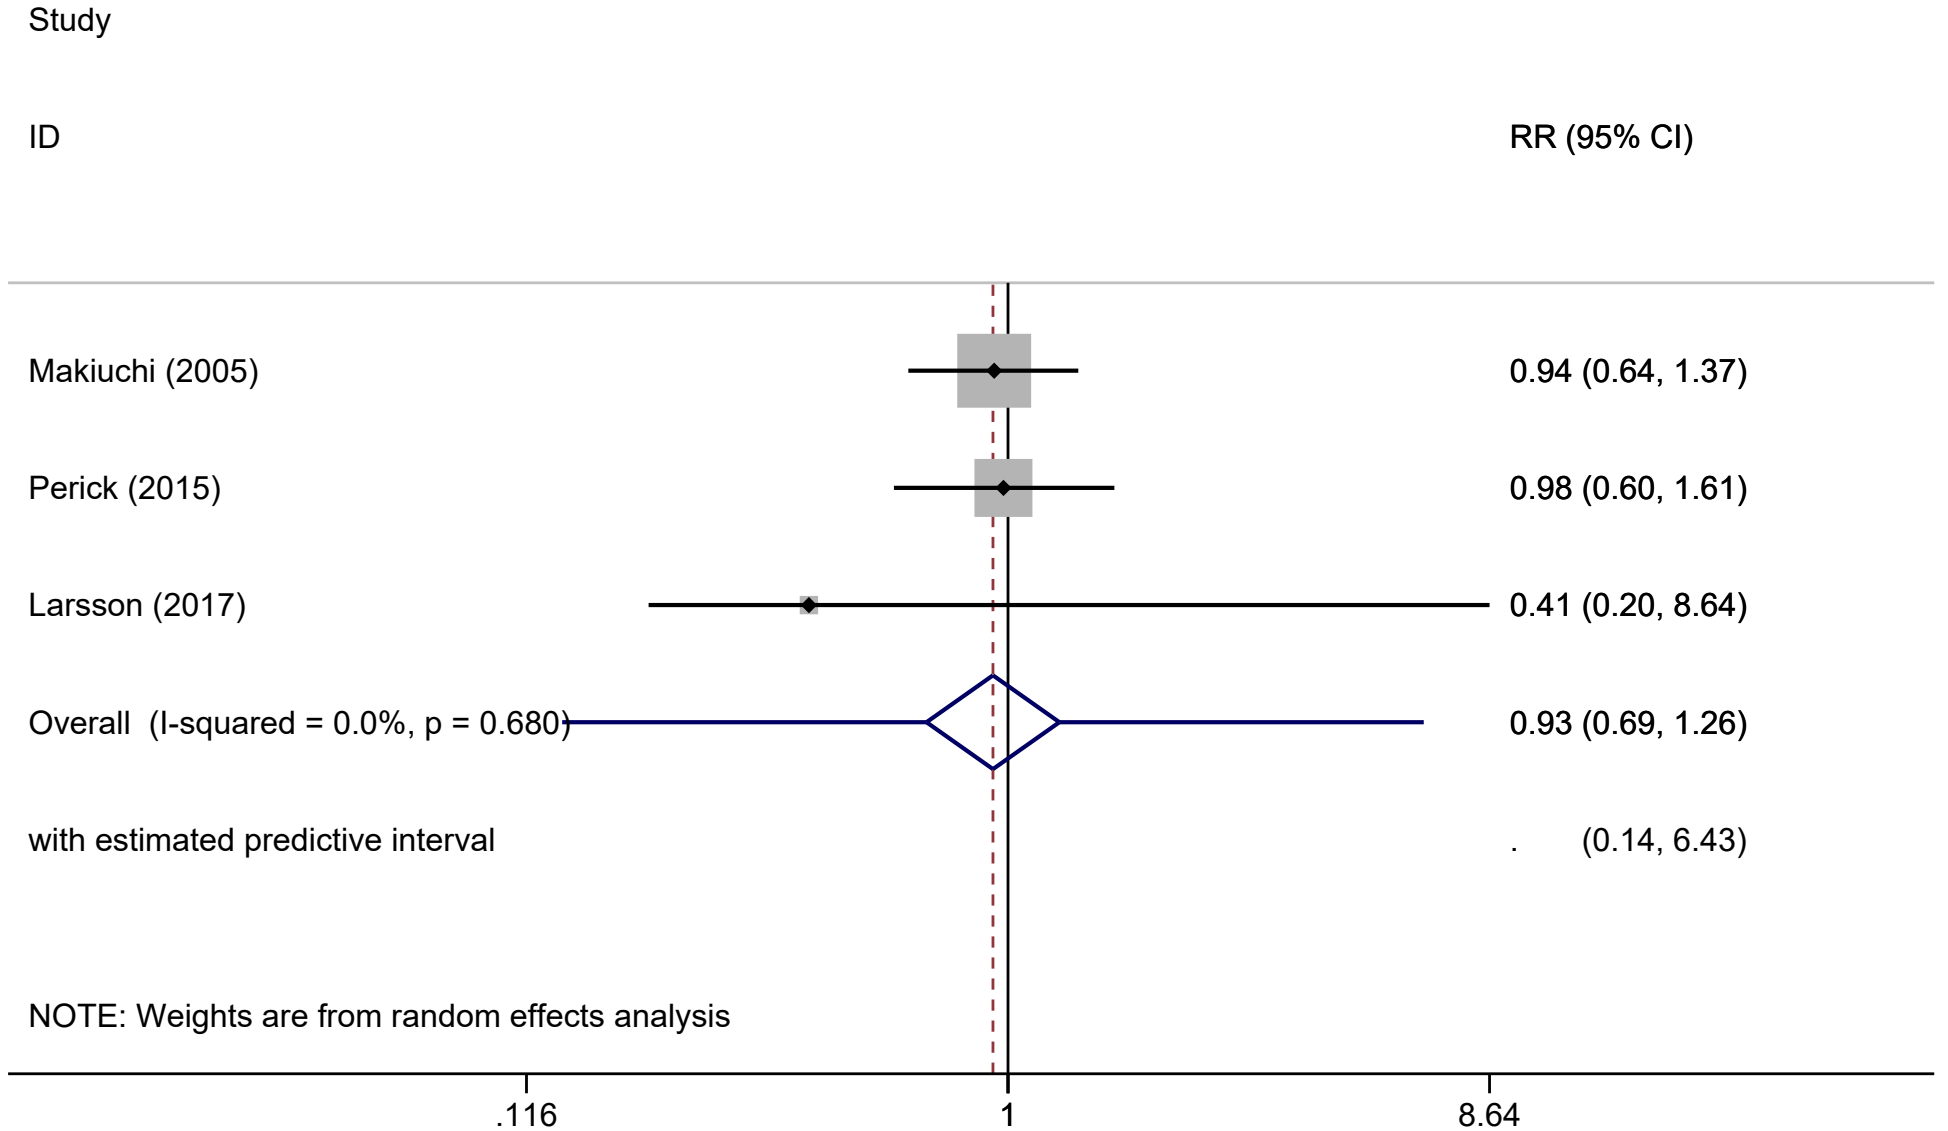

# Supplementary figure 70, Glioma, Per 1 cup, only cohort studies

Study

ID

RR (95% CI)

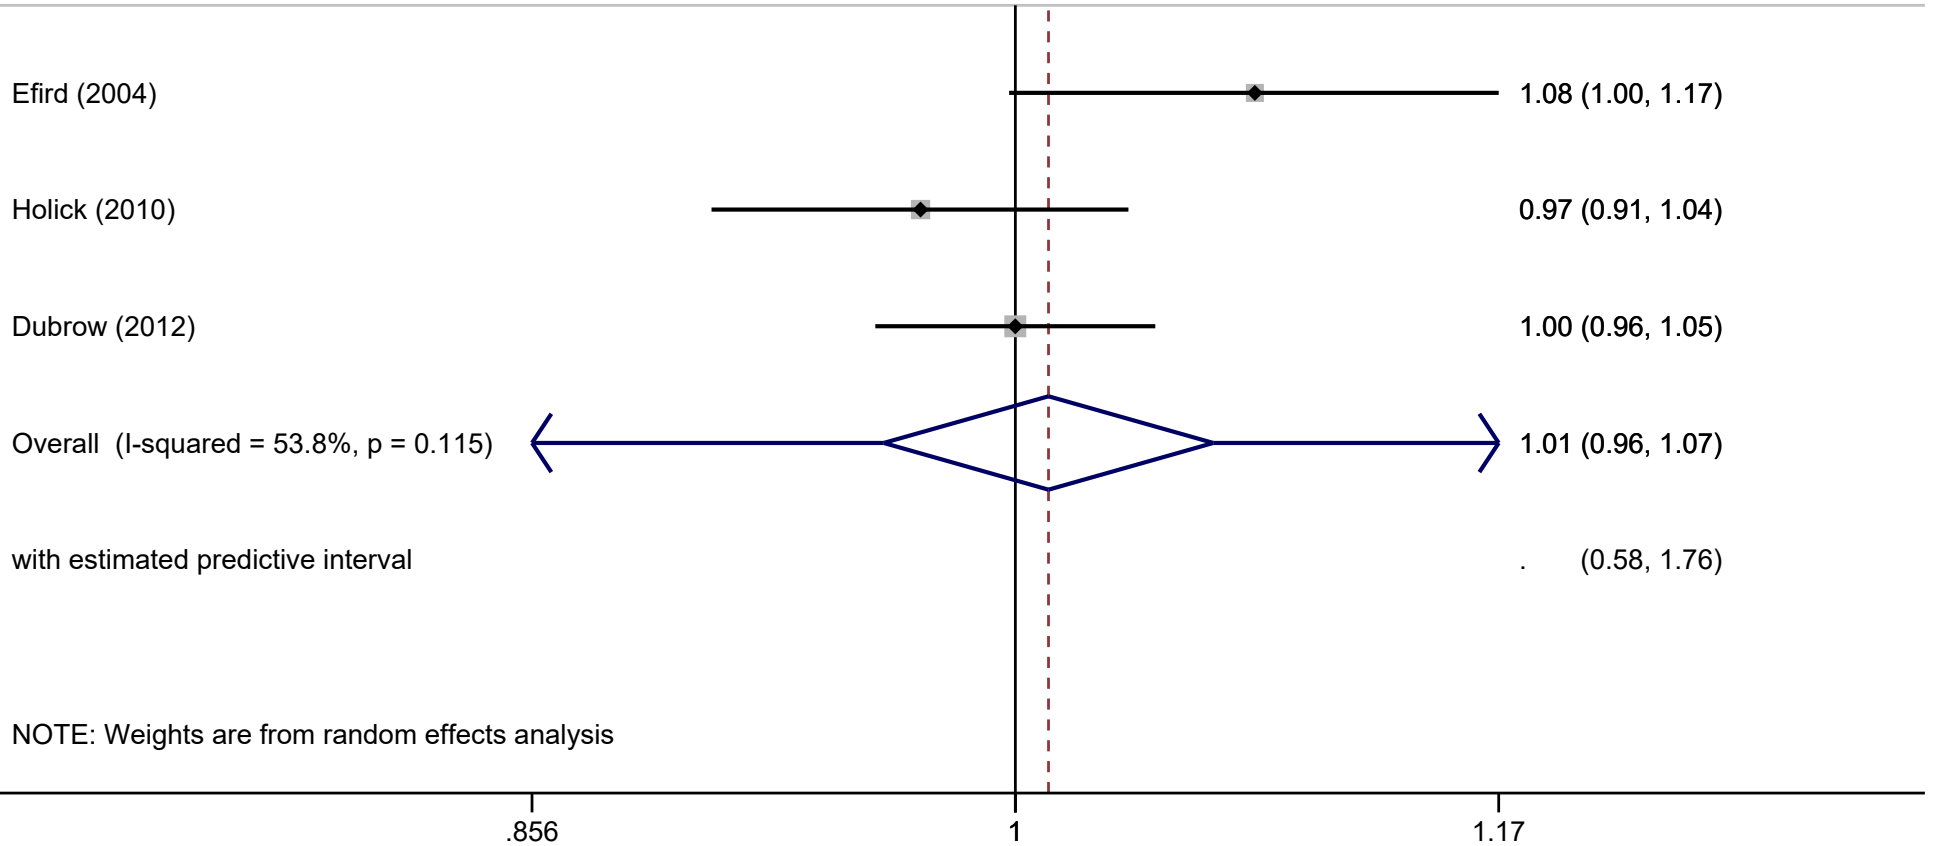

NOTE: Weights are from random effects analysis
